# Supplementary material
Source: PubMed Central journal article supplement (PMC3508136)
Supplement: NIHMS416926-supplement-1_si_001.pdf [file NIHMS416926-supplement-1_si_001.pdf]

**Supporting Information for:**

**Using a Build-and-Click Approach for Producing Structural and Functional Diversity in DNA-Targeted Hybrid Anticancer Agents**

*Song Ding, Xin Qiao, Gregory L. Kucera, and Ulrich Bierbach\**

| <b><u>Content</u></b>                                                               | <b><u>page</u></b> |
|-------------------------------------------------------------------------------------|--------------------|
| 1. Synthetic Procedures                                                             | S2                 |
| 1.1. Synthesis of building blocks                                                   | S2                 |
| 1.2. Synthesis of Pt-Acridines                                                      | S10-S11            |
| 2. LC-MS analysis of reaction mixtures                                              | S12-S72            |
| <b>Figure S1.61.</b> Percent conversion in ‘click’ reactions for platinum-acridines | S73                |
| 3. NMR spectra for purified compounds                                               | S74-S104           |
| 4. LC-MS analysis of purified compounds                                             | S105-S119          |
| 5. Cell proliferation assays                                                        | S120               |
| <b>Figures S5.1.</b> and <b>S5.2.</b> Drug-response curves.                         | S120               |
| 6. References                                                                       | S121               |

# 1. Synthetic Procedures

## Acronyms used for reagents:

**CDI:** 1,1'-carbonyldiimidazole

**DMF:** Dimethylformamide

**DCM:** Dichloromethane

**MeOH:** Methanol

**TEA:** Triethanolamine

**TFA:** Trifluoroacetic acid

## 1.1. Synthetic procedures for building blocks

The synthetic precursors [PtCl<sub>2</sub>(en)] (**S11**), cisplatin (**S12**), and *rac*-1,3-diaminopropan-2-ol (**S13**),<sup>[1]</sup> 9-phenoxyacridine (**S1**),<sup>[2]</sup> and building blocks *N*<sup>1</sup>-(acridin-9-yl)-*N*<sup>2</sup>-methylethane-1,2-diamine (**A1**),<sup>[2]</sup> and *N*<sup>1</sup>-(acridin-9-yl)-*N*<sup>3</sup>-methylpropane-1,3-diamine (**A2**)<sup>[3]</sup> were synthesized according to the cited methods.

### Scheme 1. Synthesis of precursor A3.

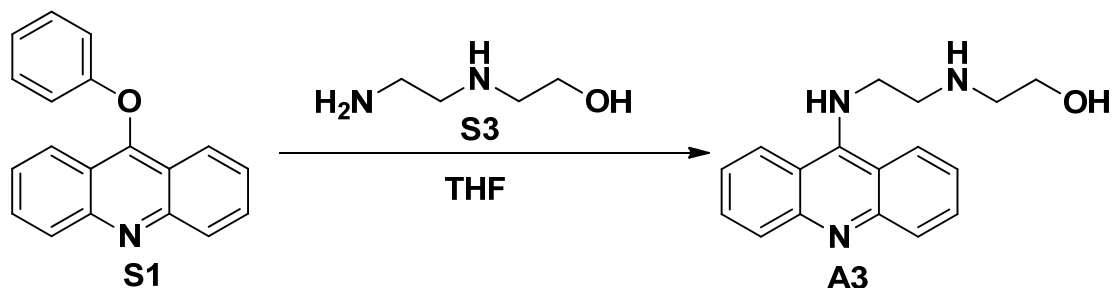

A mixture of phenoxyacridine (**S1**) (2.71 g, 0.01 mol) and 2-(2-aminoethylamino)ethanol (**S3**) (1.14 g, 0.011 mol) in 15 mL of anhydrous THF was refluxed for 16 h. The solvent was evaporated off and the residue was dissolved in 30 mL of acetone. To this solution were added 5 mL of concentrated HCl and the mixture was stirred at 4 °C for 3 hours. A yellow precipitate formed which was recovered by filtration, resuspended in 50 mL of 2 M ammonium hydroxide, and stirred at room temperature for 30 min. The aqueous phase was extracted with CH<sub>2</sub>Cl<sub>2</sub> and the organic phase was collected, dried over Na<sub>2</sub>SO<sub>4</sub>, and concentrated using rotary evaporation, affording 2.57 g of the free base as a yellow solid (Yield: 92%). <sup>1</sup>H NMR ((CD<sub>3</sub>)<sub>2</sub>SO) δ 8.27 (d, *J* = 8.5 Hz, 2H), 7.69 (d, *J* = 7.6 Hz, 2H), 7.59 (t, *J* = 7.3 Hz, 1H), 7.26 (t, *J* = 7.5 Hz, 2H), 4.50 (s, 1H), 3.88 (t, *J* = 6.2 Hz, 2H), 3.47 (t, *J* = 5.7 Hz, 1H), 2.90 (t, *J* = 6.2 Hz, 2H), 2.63 (t, *J* = 5.7 Hz, 2H). <sup>13</sup>C NMR ((CD<sub>3</sub>)<sub>2</sub>SO) δ 151.70, 129.74, 124.84, 121.30, 60.39, 51.27, 50.18, 40.90. MS (ESI, positive-ion mode): calculated for C<sub>17</sub>H<sub>20</sub>N<sub>3</sub>O ([M+H]<sup>+</sup>), 282.15; found: 282.3.

### Scheme 2. Synthesis of precursor A2.

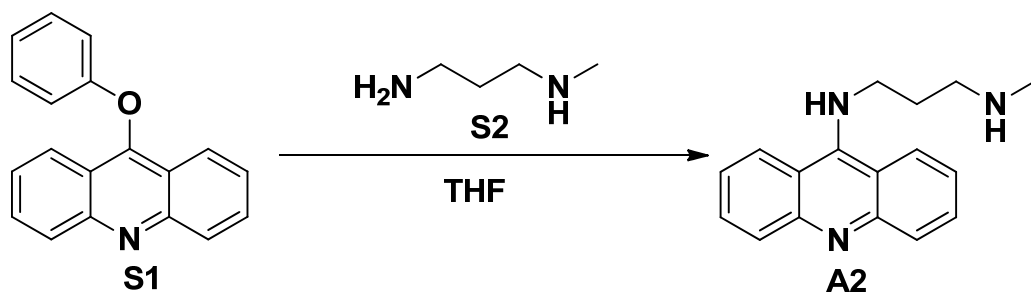

**A2** was prepared using the procedure described for **A3**. Yield: 94%.  $^1\text{H}$  NMR (300 MHz,  $\text{CDCl}_3$ )  $\delta$  8.12 (d,  $J = 8.7$ , 2H), 8.02 (d,  $J = 8.7$ , 2H), 7.61 (t,  $J = 6.7$  Hz, 2H), 7.25 (t,  $J = 7.5$  Hz, 2H), 4.01 (t,  $J = 5.9$  Hz, 2H), 2.96 - 2.75 (m, 2H), 2.53 (s, 3H), 1.94-1.68 (p,  $J = 5.9$  Hz, 2H). MS (ESI, positive-ion mode): calculated for  $\text{C}_{17}\text{H}_{20}\text{N}_3$  ( $[\text{M}+\text{H}]^+$ ), 266.36; found: 266.2.

### Scheme 3. Synthesis of precursor A4.

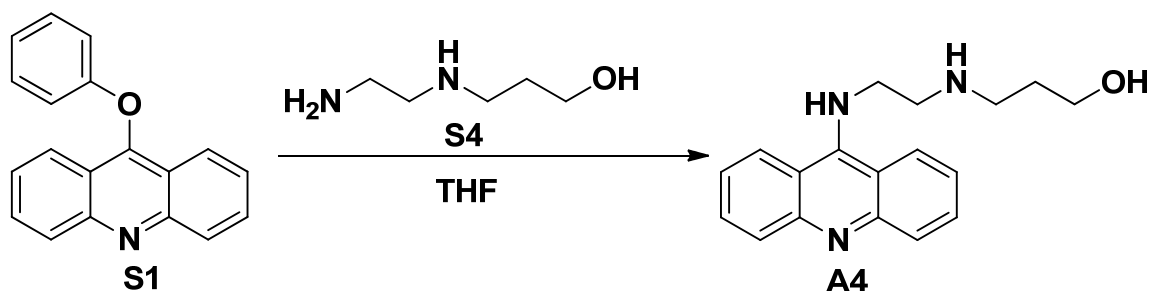

**A4** was prepared using the procedure described for **A3**. Yield: 86%.  $^1\text{H}$  NMR ( $\text{CDCl}_3$ ) 8.11 (d,  $J = 8.5$  Hz, 2H), 8.02 (d,  $J = 8.6$  Hz, 2H), 7.72 - 7.54 (m, 2H), 7.35-7.29 (m, 2H), 3.87-3.82 (m, 4H), 3.16 - 2.64 (m, 4H), 1.79 (p,  $J = 6.5$  Hz, 2H).  $^{13}\text{C}$ -NMR ( $\text{CDCl}_3$ ) 151.97, 147.93, 130.25, 127.65, 123.25, 122.70, 116.33, 62.15, 49.48, 48.91, 47.68, 31.98. MS (ESI, positive-ion mode): calculated for  $\text{C}_{18}\text{H}_{22}\text{N}_3\text{O}$  ( $[\text{M}+\text{H}]^+$ ), 296.38; found: 296.3.

### Scheme 4. Synthesis of precursor A5.

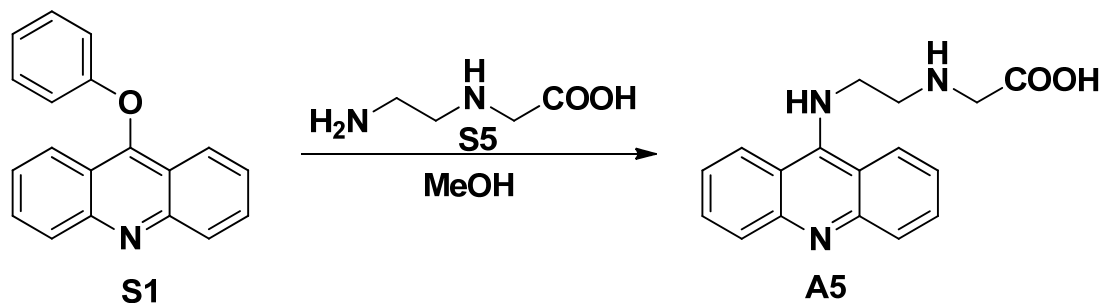

A mixture of phenoxyacridine (**S1**) (2.71 g, 0.01 mol) and 2-((2-aminoethyl)amino)glycine (**S5**) (1.3 g, 0.011 mol) in 20 mL of dry MeOH was refluxed for 3 h. The yellow solid that precipitated

during the reaction was collected by filtration, washed with hot THF and ether, and dried in a vacuum, affording 2.55 g of the product as a yellow solid (Yield: 86 %).  $^1\text{H}$  NMR ( $(\text{CD}_3)_2\text{SO}$ ) 8.22 (m, 2H), 7.55 (t,  $J = 7.6$  Hz, 2H), 7.43 (m, 2H), 7.15 (t,  $J = 7.6$  Hz, 2H), 4.08 (d,  $J = 6.0$  Hz, 2H), 3.22 (s, 2H), 3.16 (t,  $J = 5.9$  Hz, 2H). A  $^{13}\text{C}$  NMR spectrum of this compound was not obtained due to limited solubility of the compound. MS (ESI, positive-ion mode): calculated for  $\text{C}_{17}\text{H}_{18}\text{N}_3\text{O}_2$  ( $[\text{M}+\text{H}]^+$ ), 296.34; found: 296.3.

#### Scheme 5. Synthesis of precursor A6.

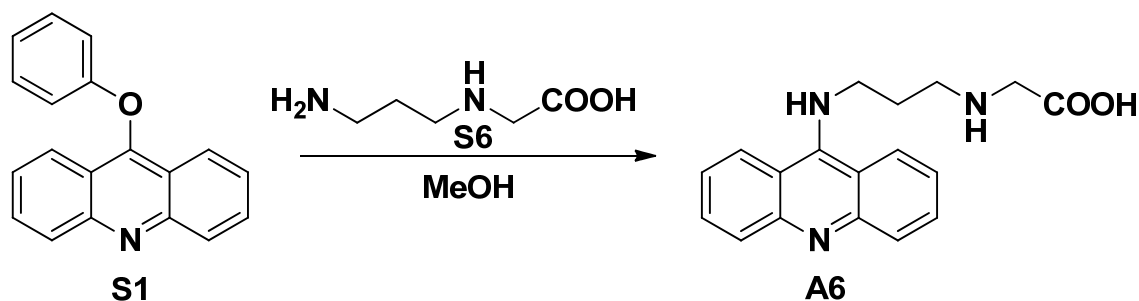

**A6** was prepared using the procedure described for **A5**. Yield: 91%.  $^1\text{H}$  NMR ( $(\text{CD}_3)_2\text{SO}$ )  $\delta$  8.21 (d,  $J = 8.4$  Hz, 2H), 7.54 (m, 3H), 7.12-7.18 (m, 4H), 6.93-6.62 (m, 2H), 3.91 (t,  $J = 6.4$  Hz, 2H), 3.21 (s, 2H), 3.01 (t,  $J = 7.2$  Hz, 2H), 2.03 (p,  $J = 6.5$  Hz, 2H).  $^{13}\text{C}$  NMR ( $(\text{CD}_3)_2\text{SO}$ )  $\delta$  166.95, 157.31, 152.15, 130.13, 129.21, 125.84, 120.79, 118.56, 115.13, 49.87, 48.74, 45.42, 27.92. MS (ESI, positive-ion mode): calculated for  $\text{C}_{18}\text{H}_{20}\text{N}_3\text{O}_2$  ( $[\text{M}+\text{H}]^+$ ), 310.37; found: 310.2.

#### Scheme 6. Synthesis of precursor A7.

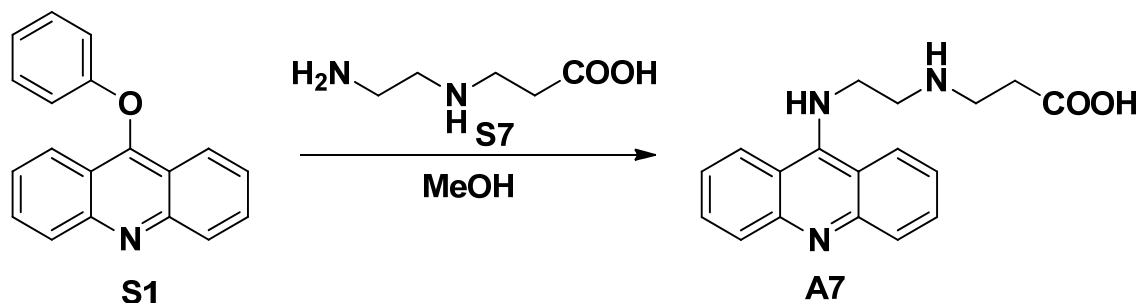

**A7** was prepared using the procedure described for **A5**. Yield: 84%.  $^1\text{H}$  NMR ( $\text{D}_2\text{O}$ )  $\delta$  8.04 (d,  $J = 8.7$  Hz, 2H), 7.83 (dd,  $J = 8.4, 7.0$  Hz, 2H), 7.58 - 7.34 (m, 4H), 4.33 (t,  $J = 6.1$  Hz, 2H), 3.60 (t,  $J = 5.8$  Hz, 1H), 3.33 (t,  $J = 6.3$  Hz, 2H), 3.33 (t,  $J = 6.3$  Hz, 2H).  $^{13}\text{C}$  NMR ( $\text{D}_2\text{O}$ )  $\delta$  166.95, 157.31, 152.15, 130.13, 129.21, 125.84, 118.56, 115.13, 49.87, 48.80, 45.42, 27.92. MS (ESI, positive-ion mode): calculated for  $\text{C}_{18}\text{H}_{20}\text{N}_3\text{O}_2$  ( $[\text{M}+\text{H}]^+$ ), 310.37; found: 310.3.

### Scheme 7. Synthesis of precursor A8.

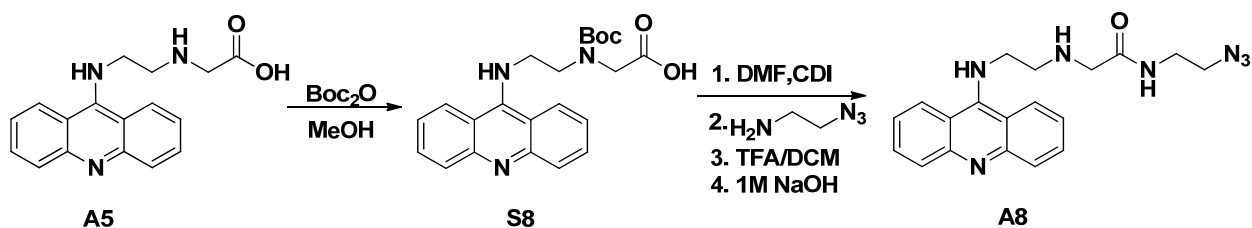

The Boc-protected acridine derivative (**S8**) (1.36 g, 4.6 mmol) was synthesized as follows. **A5** was suspended in 30 mL of anhydrous methanol, to which was added  $\text{Boc}_2\text{O}$  (1.3 g, 6 mmol) in 5 mL of anhydrous MeOH at 0-5 °C maintained with an ice bath. The mixture was then stirred at room temperature for 4 h. The solvent was removed by rotary evaporation and residue was dissolved in 10 mL of dichloromethane and precipitated with 200 mL of anhydrous diethyl ether. The solid was recovered by filtration and dried in a vacuum affording 1.79 g (99%) of the product as a yellow solid, which was used in the next step without further purification.

Compound **S8** (1 g, 2.52 mmol) and 1,1'-carbonyldiimidazole (CDI, 533 mg, 3.28 mmol) were combined in 20 mL of anhydrous DMF. The mixture was heated to 40-50 °C and stirred for 6 h. Then the solution was cooled to 0-5 °C in an ice bath and 264 mg of 2-azidoethanamine dissolved in 3 mL of anhydrous DMF were added. The mixture was stirred at 0-5 °C for 4 h. DMF was removed by vacuum distillation at 35-40 °C, and the residue was redissolved in 40 mL of dichloromethane and washed with 1 M HCl (3 × 20 mL). The organic phase was collected, dried with anhydrous  $\text{Na}_2\text{SO}_4$ , and concentrated to afford an orange oil. To remove the Boc group, the residue was dissolved in 6 mL of a 1:1 mixture of anhydrous dichloromethane and trifluoroacetic acid and stirred at room temperature for 3 h. The reaction was quenched by adding 10 mL of 1 M NaOH solution. The crude product was extracted from NaOH solution with DCM, dried over anhydrous  $\text{Na}_2\text{SO}_4$ , and concentrated. The product was purified by flash chromatography ( $\text{Al}_2\text{O}_3$ , DCM:MeOH, 30:1). Yield: 0.59 g (64 %).  $^1\text{H}$  NMR ( $\text{CDCl}_3$ )  $\delta$  8.10 (d,  $J = 8.7$  Hz, 2H), 7.97 (d,  $J = 8.6$  Hz, 2H), 7.60 (t,  $J = 8.3, 6.8$  Hz, 2H), 7.40 - 7.14 (m, 3H), 3.89 (t,  $J = 5.6$  Hz, 2H), 3.50 - 3.23 (m, 6H), 2.99 (t,  $J = 5.6$  Hz, 2H).  $^{13}\text{C}$  NMR ( $\text{CDCl}_3$ )  $\delta$  172.56, 152.98, 146.04, 131.21, 125.75, 123.56, 122.97, 115.48, 50.72, 48.69, 48.47, 44.85, 38.82, 36.22. MS (ESI, positive-ion mode): calculated for  $\text{C}_{19}\text{H}_{22}\text{N}_7\text{O}$  ( $[\text{M}+\text{H}]^+$ ), 364.42; found: 364.3.

### Scheme 8. Synthesis of precursor A9.

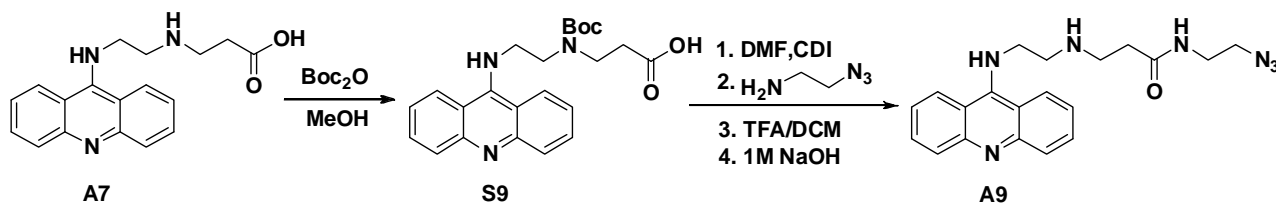

A9 was prepared using the procedure described for A8. Yield: 64%.  $^1\text{H}$  NMR ( $\text{CDCl}_3$ )  $\delta$  8.09 (d,  $J = 8.7$  Hz, 2H), 8.02 (d,  $J = 8.7$  Hz, 2H), 7.59 (t,  $J = 7.6$  Hz, 2H), 7.41 (s, 1H), 7.27 (t,  $J = 7.5$  Hz, 2H), 4.95 (brs, 2H), 3.92 (t,  $J = 5.6$  Hz, 2H), 3.44 (s, 4H), 2.91-3.14 (m, 4H), 2.53 (t,  $J = 6.0$  Hz, 2H).  $^{13}\text{C}$  NMR ( $\text{CDCl}_3$ )  $\delta$  152.09, 149.60, 129.65, 129.23, 123.60, 121.91, 115.75, 51.37, 51.32, 36.51, 29.15. MS (ESI, positive-ion mode): calculated for  $\text{C}_{20}\text{H}_{24}\text{N}_7\text{O}$  ( $[\text{M}+\text{H}]^+$ ), 378.45; found: 378.3.

### Scheme 9. Synthesis of precursor A10.

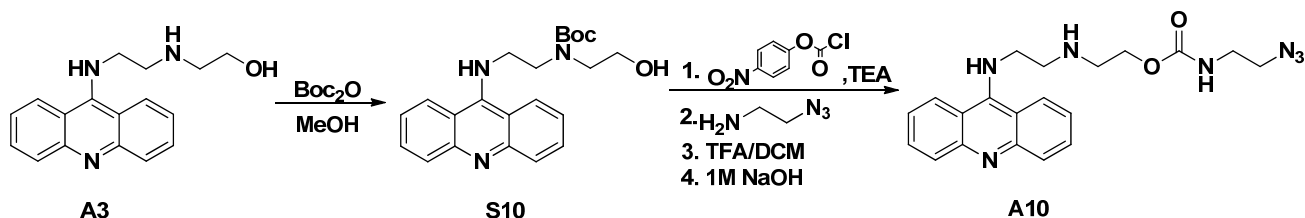

The Boc-protected acridine derivative (S10) was prepared as described for S8 starting with compound A3. Compound S10 (1 g, 2.62 mmol), TEA (793 mg, 7.85 mmol) and 4-nitrobenzyl chloroformate (732 mg, 3.4 mmol) were dissolved in 20 mL of anhydrous DCM. The mixture was stirred at room temperature for 16 h. Then 271 mg of 2-azidoethanamine dissolved in 5 mL of anhydrous DCM was added and the reaction was stirred for another 8 h. The solvent was removed using vacuum distillation and the residue was redissolved in 40 mL of DCM and washed with 1 M HCl ( $3 \times 20$  mL). The organic phase was collected, dried with anhydrous  $\text{Na}_2\text{SO}_4$ , and concentrated to afford an orange oil. To remove the Boc group, the orange oil was dissolved in 6 mL of a 1:1 mixture of anhydrous dichloromethane and trifluoroacetic acid and stirred at room temperature for 3 h. The reaction was quenched by adding 10 mL of 1 M NaOH solution. The crude product was extracted from NaOH solution with DCM, dried over anhydrous  $\text{Na}_2\text{SO}_4$ , and concentrated. The product was further purified by flash chromatography ( $\text{Al}_2\text{O}_3$ , DCM:MeOH, 30:1). Yield: 0.73 g (71 %).  $^1\text{H}$  NMR ( $\text{CDCl}_3$ )  $\delta$  8.12 - 7.96 (m, 4H), 7.59 (t,  $J = 7.8$  Hz, 2H), 7.23 (t,  $J = 7.6$  Hz, 2H), 5.65 (brs, 1H), 4.27 (t,  $J = 4.8$  Hz, 2H), 3.92 (t,  $J = 5.7$  Hz, 1H), 3.61 - 3.20 (m, 4H), 3.01 (t,  $J = 5.7$  Hz, 2H), 2.96 (t,  $J = 4.9$  Hz, 2H).  $^{13}\text{C}$  NMR ( $\text{CDCl}_3$ )  $\delta$  156.53, 152.69, 145.93, 131.22, 125.98, 123.3, 123.00, 115.07, 64.48, 50.97, 48.35, 48.17, 47.83, 40.45. MS (ESI, positive-ion mode): calculated for  $\text{C}_{20}\text{H}_{24}\text{N}_7\text{O}_2$  ( $[\text{M}+\text{H}]^+$ ), 394.45; found: 394.3.

**Scheme 10. Synthesis of precursor P1<sup>[4]</sup>.**

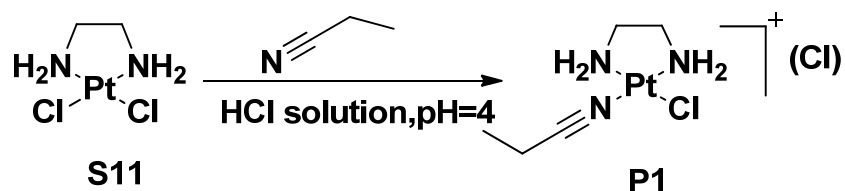

The complex [PtCl<sub>2</sub>(en)] (**S11**) (0.50 g, 1.54 mmol) was heated under reflux in 25 mL of dilute HCl (pH 4) with propionitrile (6.85 mL, 98.5 mmol) until the yellow suspension turned into a colorless solution (~2 h). Solvent was removed by rotary evaporation, and the pale-yellow residue was redissolved in 10 mL of dry methanol. A small amount of an insoluble yellow solid was removed by membrane filtration and the colorless filtrate was added directly into 250 mL of vigorously stirred dry diethyl ether, affording **P1** as an off-white, extremely hygroscopic microcrystalline precipitate. Yield: 0.48 g (83%). <sup>1</sup>H NMR (D<sub>2</sub>O) δ 5.72, 5.64 (2 br s, 0.7 H, HD exchange), 2.87(q, J=7.5 Hz, 2H), 2.48 - 2.75 (m, Pt satellites, 4 H), 1.3 (t, J=7.5 Hz, 3H).

**Scheme 11. Synthesis of precursor P2<sup>[5]</sup>.**

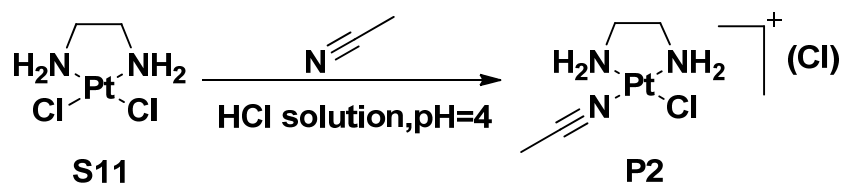

**P2** was prepared using the similar procedure as described for **P1** as the white solid with the yield 89%. <sup>1</sup>H NMR (D<sub>2</sub>O) δ 5.80, 5.65 (2 br s, 1H, HD exchange), 2.87(q, J=7.5 Hz, 2H), 2.55 - 2.65 (m, Pt satellites, 4 H), 2.53 (s, 3H).

**Scheme 12. Synthesis of precursor P3.**

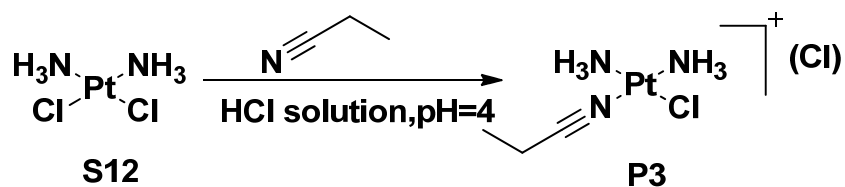

**P3** was prepared using the procedure described for **P1**. Yield: 74%.  $^1\text{H}$  NMR ( $\text{D}_2\text{O}$ )  $\delta$  2.89 (t,  $J = 7.6$ , 2H), 1.30 (t,  $J = 7.5$ , 3H).

**Scheme 13. Synthesis of precursor P4.**

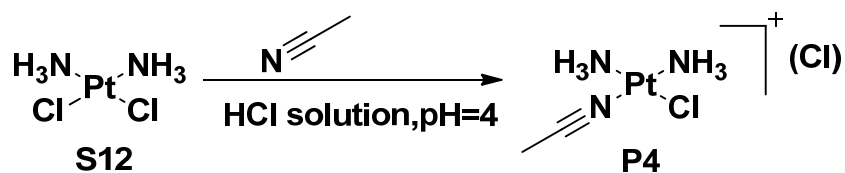

**P4** was prepared using the procedure described for **P1**. Yield: 63%.  $^1\text{H}$  NMR ( $\text{D}_2\text{O}$ )  $\delta$  2.53 (3 H, m, Pt satellites), 4.35, 4.48 (4 H, HD exchange, 2 br s).

**Scheme 14. Synthesis of precursor P5.**

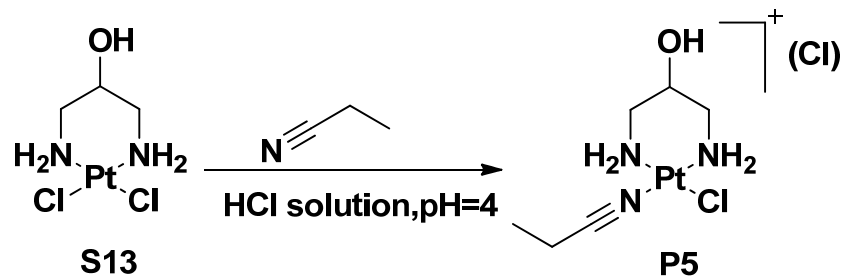

**P5** was prepared using the procedure described for **P1**. Yield: 91%.  $^1\text{H}$  NMR ( $\text{D}_2\text{O}$ )  $\delta$  4.26 (m, 1H), 2.99 - 2.54 (m, 6H), 1.39 - 0.96 (t,  $J = 7.5$  Hz, 3H).



**Scheme 15. Synthesis of precursor P6.**

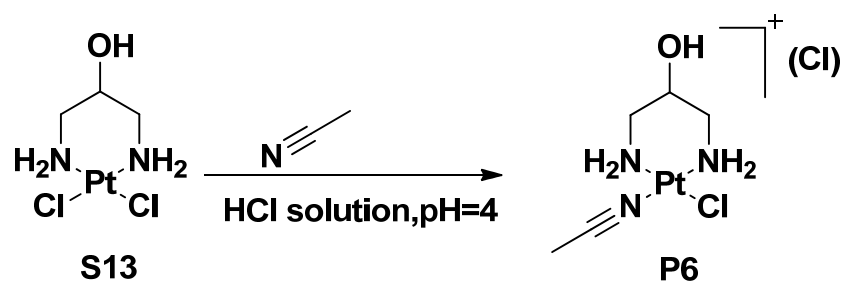

**P6** was prepared using the procedure described for **P1**. Yield: 77%.  $^1\text{H}$  NMR ( $\text{D}_2\text{O}$ )  $\delta$  4.28 (m, 1H), 2.85 - 2.53 (m, 4H), 2.53 (s, 3H).

## 1.2. Synthesis of Pt-Acridines

Scheme 16. Resynthesis of compound P4-A3.

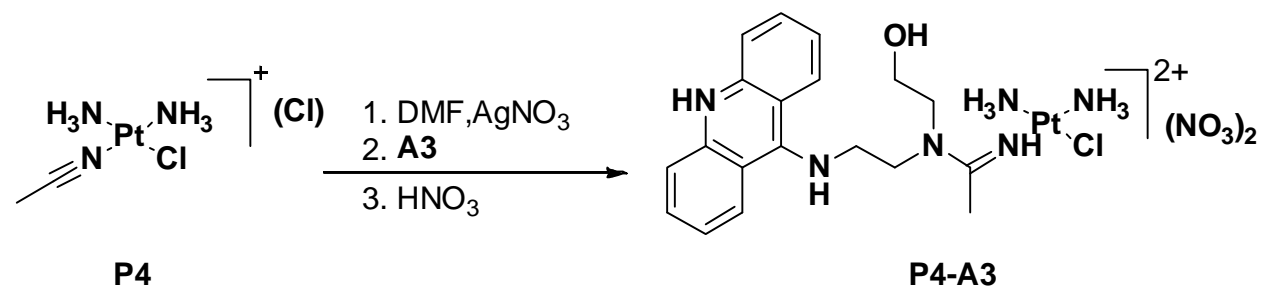

**P4-A3** was prepared using the same procedure as described for **P1-A3** and was recovered with a yield of 87%. <sup>1</sup>H NMR (MeOD) δ 8.40 (d, *J* = 8.8 Hz, 2H), 7.87 (t, *J* = 6.8, 2H), 7.72 (dd, *J* = 8.7, 1.2 Hz, 1H), 7.49 (d, *J* = 8.4 Hz, 2H), 4.31 (t, *J* = 7.0 Hz, 2H), 4.10 (brs, 2H), 3.91 (t, *J* = 6.8 Hz, 1H), 3.75 (s, 2H), 3.65 (t, *J* = 4.9 Hz, 2H), 3.49 (t, *J* = 4.9 Hz, 2H), 2.58 (s, 3H). <sup>13</sup>C NMR (MeOD) δ 167.49, 160.02, 141.40, 136.55, 126.49, 125.30, 119.77, 114.14, 60.73, 49.86, 48.16, 47.39, 23.02. MS (ESI, positive-ion mode): for C<sub>19</sub>H<sub>28</sub>ClN<sub>6</sub>OPt ([M]<sup>+</sup>), 587.00; found: 585.2.

Scheme 17. Resynthesis of compound P6-A1.

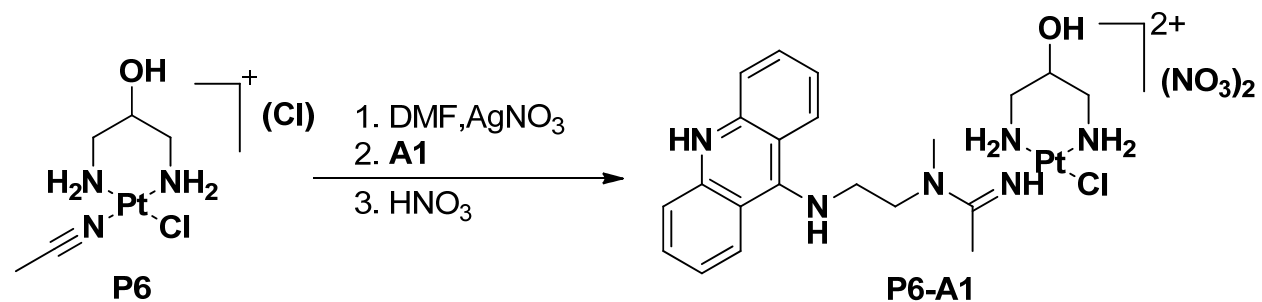

**P6-A1** was prepared using the same procedure as described for **P1-A3** and was recovered with a yield of 92%. <sup>1</sup>H NMR (DMF-*d*<sub>7</sub>) δ 13.92 (s, 1H), 9.89 (s, 1H), 8.68 (d, *J* = 8.7 Hz, 2H), 7.9 - 8.11 (m, 4H), 7.62 (td, *J* = 6.4, 3.1 Hz, 2H), 6.21 (s, 1H), 5.65 (s, 1H), 5.60 (s, 1H), 5.13 (s, 2H), 4.87 (s, 1H), 4.50 (s, 2H), 4.12 (t, *J* = 6.3 Hz, 2H), 4.06 (s, 1H), 3.50 (s, 4H), 3.18 (s, 3H), 2.59 - 2.97 (m, 4H). <sup>13</sup>C NMR (DMF) δ 165.94, 158.64, 139.96, 135.33, 125.29, 123.91, 118.98, 112.80, 65.84, 48.38, 47.80, 33.79, 28.66. MS (ESI, positive-ion mode): for C<sub>21</sub>H<sub>30</sub>ClN<sub>6</sub>OPt ([M]<sup>+</sup>), 613.04; found: 612.3.

**Scheme 18. Resynthesis of compound P1-A8.**

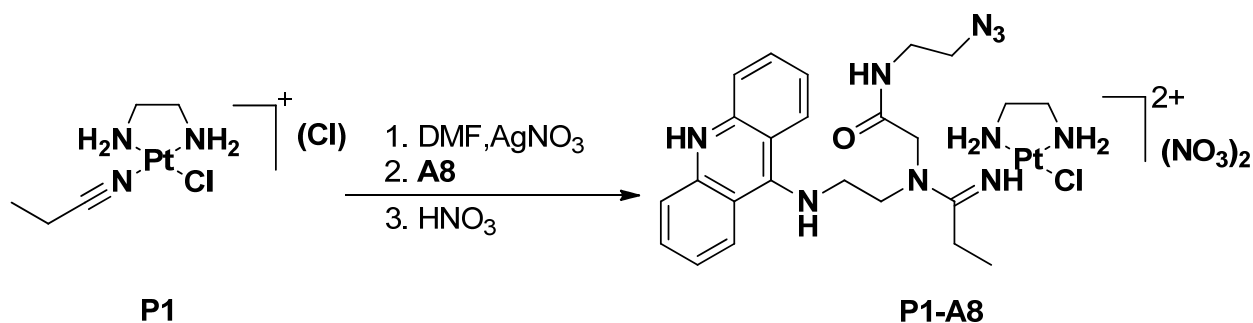

**P1-A8** was prepared using the same procedure as described for **P1-A3** and was recovered with a yield of 81%.  $^1\text{H}$  NMR (DMF-*d*7)  $\delta$  13.90 (s, 1H), 9.99 (s, 1H), 8.83 - 8.52 (m, 3H), 8.28 - 7.92 (m, 4H), 7.62 (td,  $J = 6.6, 1.5$  Hz, 2H), 6.73 (s, 1H), 5.84 (s, 2H), 5.51 (s, 2H), 4.54 (q,  $J = 5.7$  Hz, 2H), 4.44 (s, 2H), 4.15 (t,  $J = 5.9$  Hz, 2H), 3.44 - 3.52 (m, 4H), 3.06 (q,  $J = 7.9$  Hz, 2H), 2.67 (s, 4H), 1.33 (t,  $J = 7.5$  Hz, 3H).  $^{13}\text{C}$  NMR (DMF-*d*7)  $\delta$  170.37, 169.56, 158.62, 140.17, 135.27, 125.92, 123.80, 118.90, 112.94, 50.32, 48.97, 48.79, 46.34, 38.78, 28.67, 11.00. MS (ESI, positive-ion mode): for  $\text{C}_{24}\text{H}_{34}\text{ClN}_{10}\text{OPt}$  ( $[\text{M}]^+$ ), 709.13; found: 708.5.

**Scheme 19. Resynthesis of compound P3-A7.**

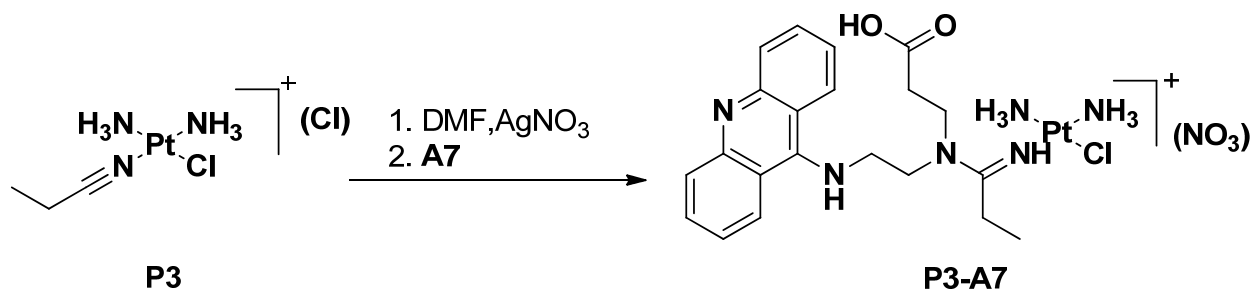

Platinum complex **P3** (354 mg, 1 mmol) was converted to its nitrate salt by reaction with  $\text{AgNO}_3$  (162 mg, 0.95 mmol) in 7 mL of anhydrous DMF.  $\text{AgCl}$  was removed by syringe filtration, and the filtrate was cooled to  $-10$  °C. Acridine precursor **A7** (310 mg, 0.1 mmol) was added to the solution, and the suspension was stirred at  $4$  °C for 5 days. The mixture was poured into 300 mL of vigorously stirred diethyl ether, and the precipitate was recovered by membrane filtration and dried in a vacuum overnight. The product was further purified by recrystallization from hot methanol to give 461.7 mg of the product as a yellow solid (Yield: 67%).  $^1\text{H}$  NMR (MeOD)  $\delta$  8.29 (d,  $J = 8.6$  Hz, 2H), 7.92 - 7.58 (m, 4H), 7.41 (t,  $J = 7.7$  Hz, 2H), 4.06 (t,  $J = 6.5$  Hz, 2H), 3.74 (t,  $J = 6.4$  Hz, 2H), 3.63 (t,  $J = 6.5$  Hz, 2H), 3.02 (t,  $J = 7.9$  Hz, 2H), 2.35 (t,  $J = 6.4$  Hz, 2H), 1.23 (t,  $J = 8.0$  Hz, 2H). MS (ESI, positive-ion mode): for  $\text{C}_{21}\text{H}_{30}\text{ClN}_6\text{O}_2\text{Pt}$  ( $[\text{M}]^+$ ), 629.04; found: 629.2.

## 2. LC-ESMS analysis of reaction mixtures

Abbreviations:

en = ethylenediamine; HPDA = 2-hydroxy-1,3-propanediamine (pn<sup>2-OH</sup>)

### The Reaction Scheme Of P1-A1

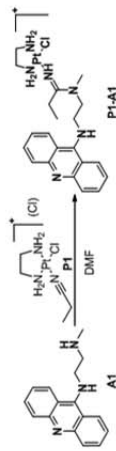

### The LC-MS Analysis Of P1-A1

## Compound Chromatogram Report - MS

Analysis Name: LIB-1310.D Instrument: LC-MSD-Trap-SL Print Date: 06/07/2012 09:15:43 PM  
 Method: SONG-L-1.M Operator: Administrator Acq. Date: 5/12/2012 12:39:00 PM  
 Sample Name: 1-1  
 Analysis Info:

Acquisition Parameters:

|                 |             |                       |            |
|-----------------|-------------|-----------------------|------------|
| Mass Range Mode | Std/Normal  | Trap Drive            | 150 m/z    |
| Ion Polarity    | Positive    | Octopole RF Amplitude | 200.0 Vpp  |
| Ion Source Type | ESI         | Capillary Exit        | 135.7 Volt |
| Dry Temp (Set)  | 350 °C      | Skimmer               | 40.0 Volt  |
| Nebulizer (Set) | 50.00 psi   | Oct 1 DC              | 12.00 Volt |
| Dry Gas (Set)   | 11.00 l/min | Oct 2 DC              | 1.73 Volt  |
|                 |             | Charge Control        | on         |

Compound List:

| # | RT [min] | Range [min] | Height | Area | Area Frac % |
|---|----------|-------------|--------|------|-------------|
| 1 | 8.8      | 8.7 - 9.0   | 2      | 14   | 13.5        |
| 2 | 9.8      | 9.7 - 10.0  | 14     | 91   | 86.5        |

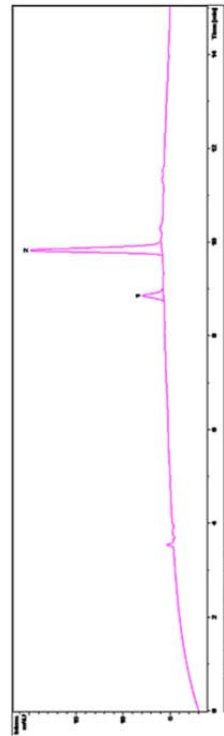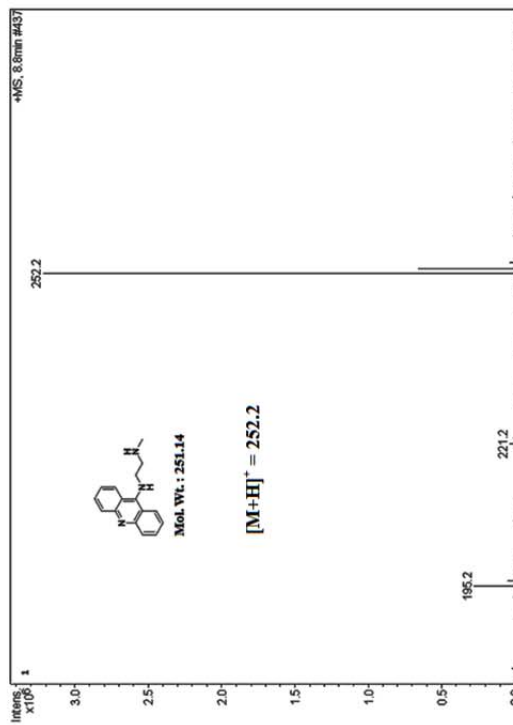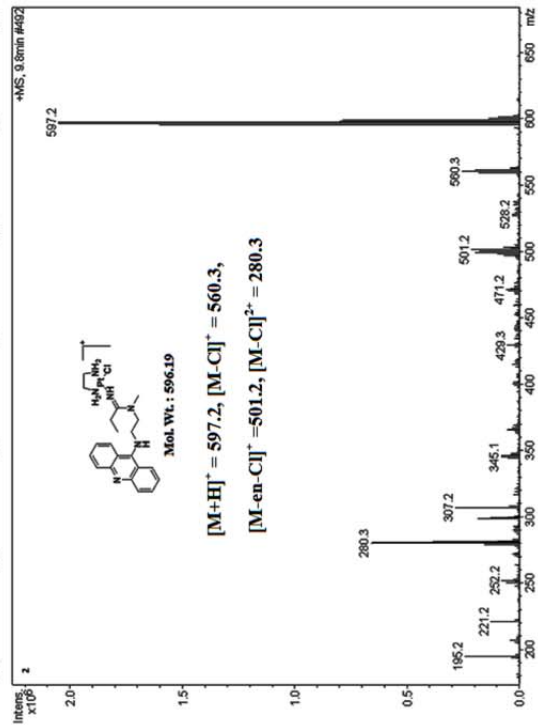

Figure S1.1. LC-ESMS analysis of reaction P1 + A1.

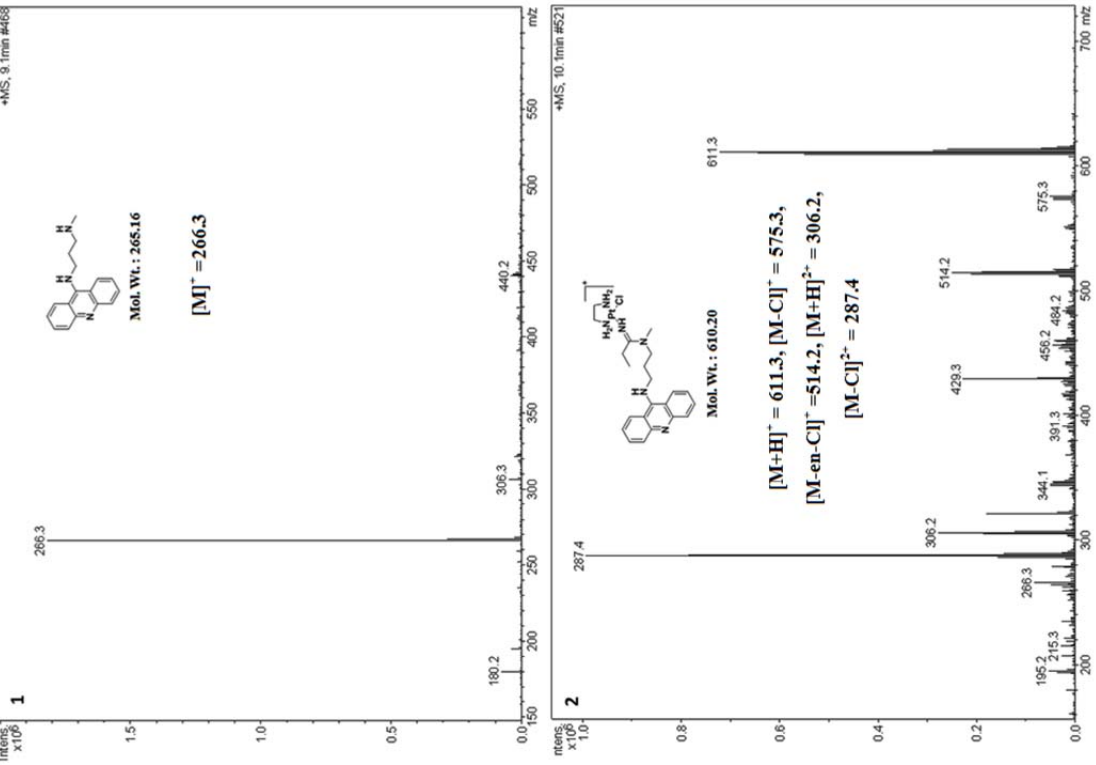

### The Reaction Scheme Of P1-A2

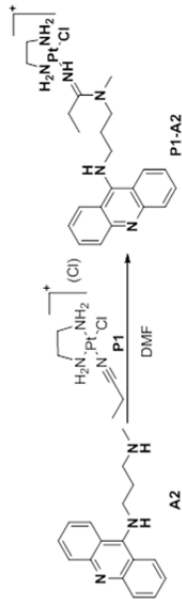

### The LC-MS Analysis Of P1-A2

### Compound Chromatogram Report - MS

Analysis Name: 05121233.D Instrument: LC-MSD-Trap-SL Print Date: 06/18/2012 03:32:27 PM  
 Method: SONG-L-1.M Operator: Administrator Acq. Date: 5/10/2012 11:02:27 PM  
 Sample Name: 1-2  
 Analysis Info:

| Acquisition Parameter: |             | Trap Drive     |  | Scan Begin |  |
|------------------------|-------------|----------------|--|------------|--|
| Mass Range Mode        | Std/Normal  | 150 m/z        |  |            |  |
| Ion Polarity           | Positive    | 2200 m/z       |  |            |  |
| Ion Source Type        | ESI         | 200.0 Vpp      |  |            |  |
| Dry Temp (Set)         | 350 °C      | 135.7 Volt     |  |            |  |
| Nebulizer (Set)        | 50.00 psi   | 40.0 Volt      |  |            |  |
| Dry Gas (Set)          | 11.00 l/min | Oct 1 DC       |  |            |  |
|                        |             | Oct 2 DC       |  |            |  |
|                        |             | Charge Control |  |            |  |
|                        |             | on             |  |            |  |

| Compound List: |          |        |             |
|----------------|----------|--------|-------------|
| #              | RT [min] | Height | Area        |
| 1              | 9.1      | 3      | 19          |
| 2              | 10.0     | 14     | 99          |
|                |          |        | Area Frac % |
|                |          |        | 16.4        |
|                |          |        | 83.6        |

### Chromatograms:

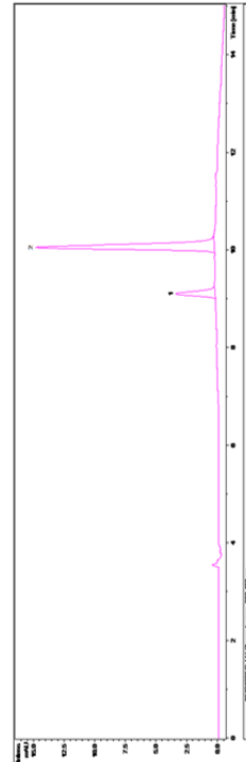

Figure S1.2 LC-ESMS analysis of reaction P1 + A2.

### The Reaction Scheme Of P1-A3

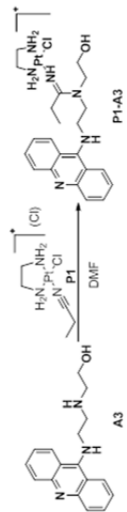

### The LC-MS Analysis Of P1-A3

#### Compound Chromatogram Report - MS

**Analysis Name:** 06081206.D **Instrument:** LC-MSD-Trap-SL **Print Date:** 06/08/2012 05:54:19 PM  
**Method:** SONG4-1.M **Operator:** Administrator **Acq. Date:** 6/8/2012 5:33:25 PM  
**Sample Name:** Ilb 1-3  
**Analysis Info:**

#### Acquisition Parameter:

|                 |             |                |           |
|-----------------|-------------|----------------|-----------|
| Mass Range Mode | Std/Normal  | Trap Drive     | 150 m/z   |
| Ion Polarity    | Positive    | Scan Begin     | 2200 m/z  |
| Ion Source Type | ESI         | Scan End       | 5 Spectra |
| Dry Temp (Set)  | 350 °C      | Averages       | 200000 µs |
| Nebulizer (Set) | 50.00 psi   | Max. Accu Time | 30000     |
| Dry Gas (Set)   | 11.00 l/min | ICC Target     | on        |
|                 |             | Charge Control |           |

#### Compound List:

| # | RT [min] | Range [min] | Height | Area | Area Frac % |
|---|----------|-------------|--------|------|-------------|
| 1 | 8.7      | 8.6 - 9.0   | 3      | 21   | 20.8        |
| 2 | 9.7      | 9.5 - 9.9   | 11     | 81   | 79.2        |

#### Chromatograms:

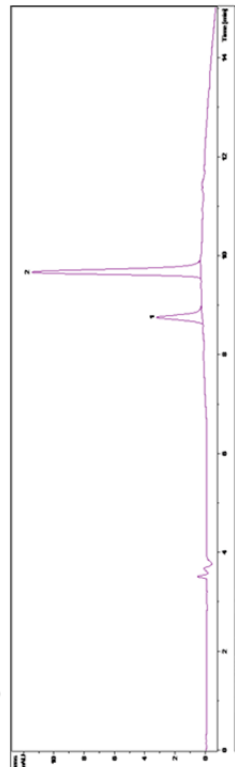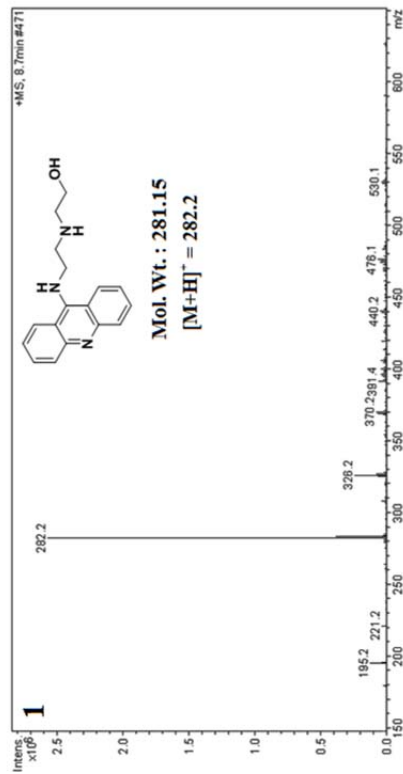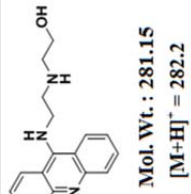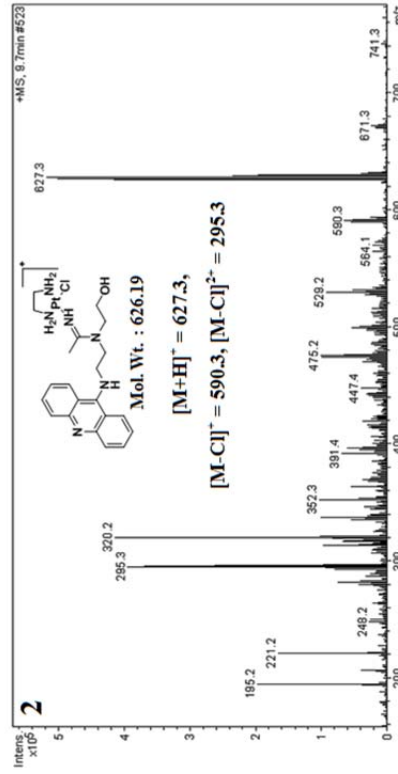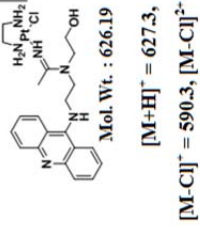

Figure S1.3 LC-ESMS analysis of reaction P1 + A3.

### The Reaction Scheme Of P1-A4

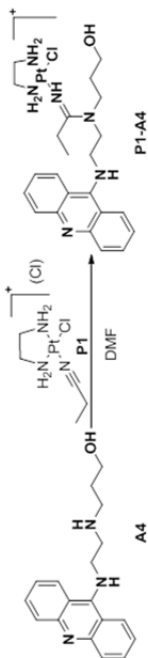

### The LC-MS Analysis Of P1-A4

### Compound Chromatogram Report - MS

**Analysis Name:** LIB-1410.D **Instrument:** LC-MSD-Trap-SL **Print Date:** 06/08/2012 12:08:55 AM  
**Method:** SONG-L-1.m **Operator:** Administrator **Acq. Date:** 5/12/2012 2:52:47 PM  
**Sample Name:** 1-4  
**Analysis Info:**

**Acquisition Parameter:**  
 Mass Range Mode: Std/Normal **Trap Drive:** 150 m/z  
 Ion Polarity: Positive **Scan Begin:** 2000 m/z  
 Ion Source Type: ESI **Scan End:** 5 Spectra  
 Dry Temp (Set): 350 °C **Capillary Exit:** 135.7 Volt  
 Nebulizer (Set): 50.00 psi **Skimmer:** 40.0 Volt  
 Dry Gas (Set): 11.00 l/min **Oct 1 DC:** 12.00 Volt  
**Oct 2 DC:** 1.73 Volt  
**Charge Control:** on

| Compound List: |          |             |        |      |             |
|----------------|----------|-------------|--------|------|-------------|
| #              | RT [min] | Range [min] | Height | Area | Area Frac % |
| 1              | 8.9      | 8.7 - 9.1   | 5      | 37   | 32.8        |
| 2              | 9.8      | 9.6 - 10.1  | 11     | 75   | 67.2        |

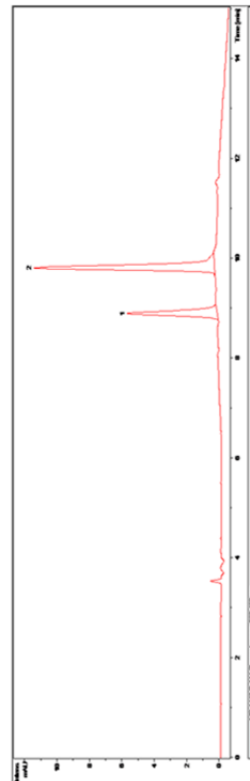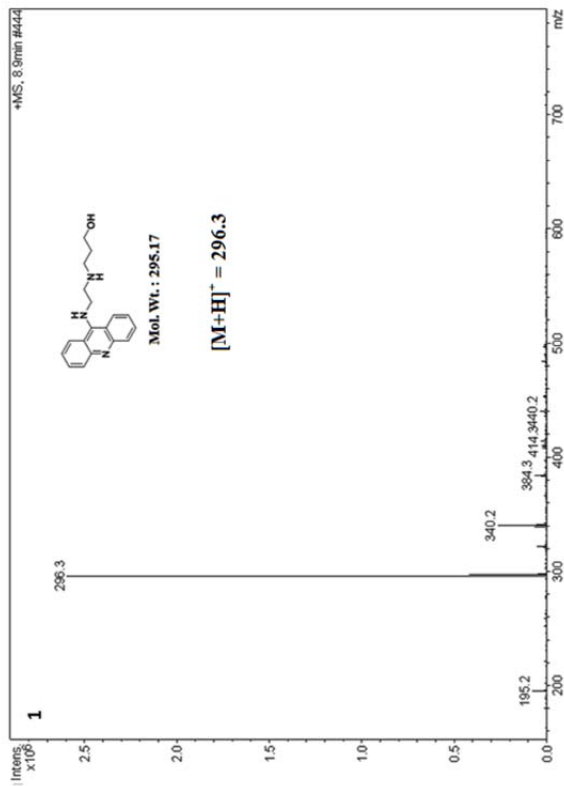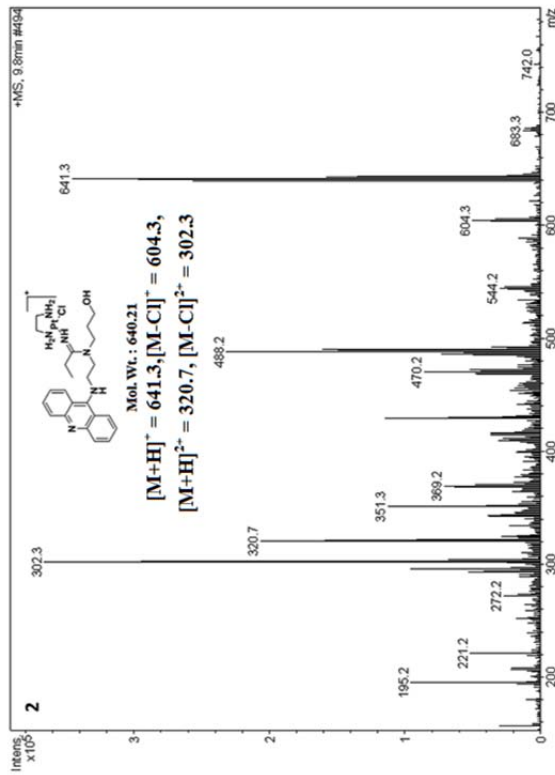

Figure S1.4 LC-ESMS analysis of reaction P1 + A4.



### The Reaction Scheme Of P1-A5

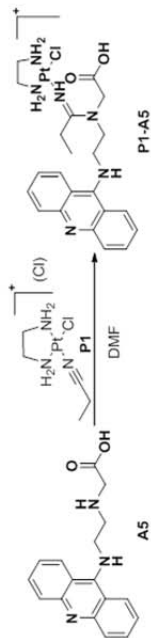

### The LC-MS Analysis Of P1-A5

### Compound Chromatogram Report - MS

Analysis Name: LIB12010.D Instrument: LC-MSD-Trap-SL Print Date: 06/08/2012 12:11:42 AM  
 Method: SONG-L-1.M Operator: Administrator Acq. Date: 5/11/2012 9:00:58 PM  
 Sample Name: 1-5-1

#### Acquisition Parameter:

|                 |             |                       |           |
|-----------------|-------------|-----------------------|-----------|
| Mass Range Mode | Std/Normal  | Trap Drive            | 150 m/z   |
| Ion Polarity    | Positive    | Octopole RF Amplitude | 2200 m/z  |
| Ion Source Type | ESI         | Capillary Ext         | 5 Spectra |
| Dry Temp (Set)  | 350 °C      | Skimmer               | 200000 µs |
| Nebulizer (Set) | 50.00 psi   | Oct 1 DC              | 30000     |
| Dry Gas (Set)   | 11.00 l/min | Oct 2 DC              | on        |

#### Compound List:

| # | RT [min] | Range [min] | Height | Area | Area Frac % |
|---|----------|-------------|--------|------|-------------|
| 1 | 9.7      | 9.6 - 9.9   | 14     | 90   | 74.8        |
| 2 | 10.3     | 10.2 - 10.5 | 3      | 30   | 25.2        |

#### Chromatograms:

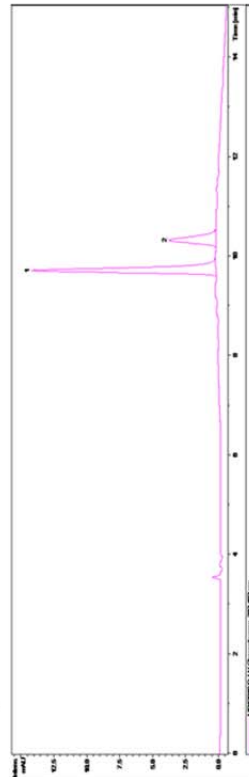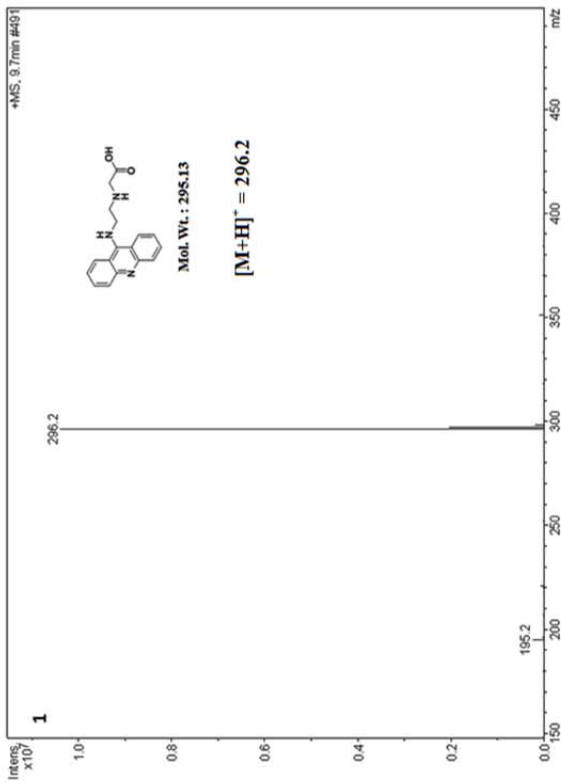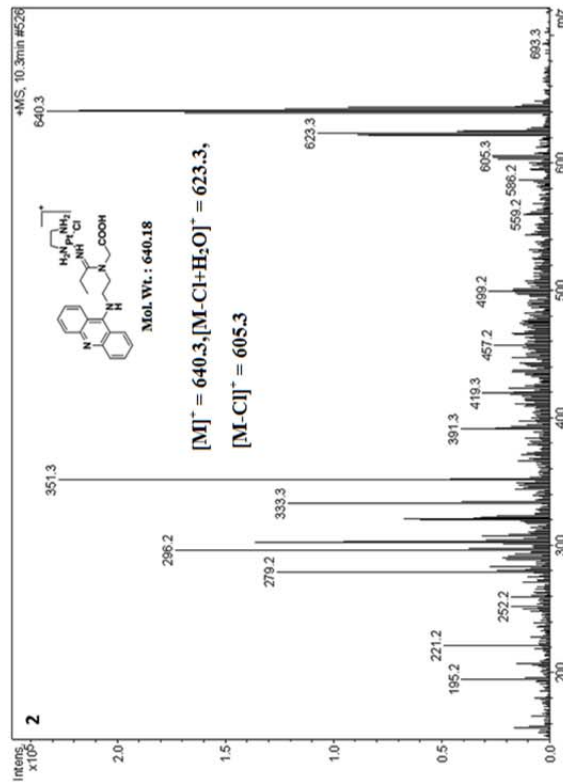

Figure S1.5 LC-ESMS analysis of reaction P1 + A5.

### The Reaction Scheme Of P1-A6

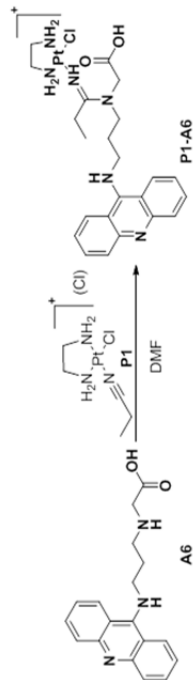

### The LC-MS Analysis Of P1-A6

## Compound Chromatogram Report - MS

**Analysis Name:** 05221208.D **Instrument:** LC-MSD-Trip-SL **Print Date:** 06/08/2012 12:18:27 AM  
**Method:** SONG-L-1.M **Operator:** Administrator **Acq. Date:** 5/22/2012 1:24:03 PM  
**Sample Name:** 1-6

#### Acquisition Parameter:

|                 |             |                       |                |
|-----------------|-------------|-----------------------|----------------|
| Mass Range Mode | Std/Normal  | Trap Drive            | 150 m/z        |
| Ion Polarity    | Positive    | Octopole RF Amplitude | 2200 m/z       |
| Ion Source Type | ESI         | Capillary Exit        | Averages       |
| Dry Temp (Set)  | 350 °C      | Skimmer               | 5 Spectra      |
| Nebulizer (Set) | 50.00 psi   | Oct 1 DC              | Max. Accu Time |
| Dry Gas (Set)   | 11.00 l/min | Oct 2 DC              | ICC Target     |
|                 |             |                       | Charge Control |

#### Compound List:

| # | RT [min] | Range [min] | Height | Area | Area Frac % |
|---|----------|-------------|--------|------|-------------|
| 1 | 9.9      | 9.8 - 10.1  | 9      | 59   | 52.0        |
| 2 | 10.5     | 10.4 - 10.8 | 7      | 54   | 48.0        |

#### Chromatograms:

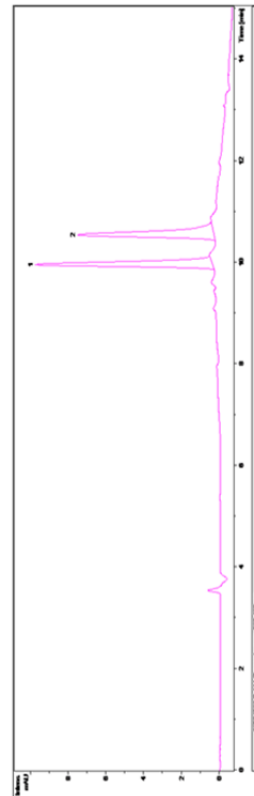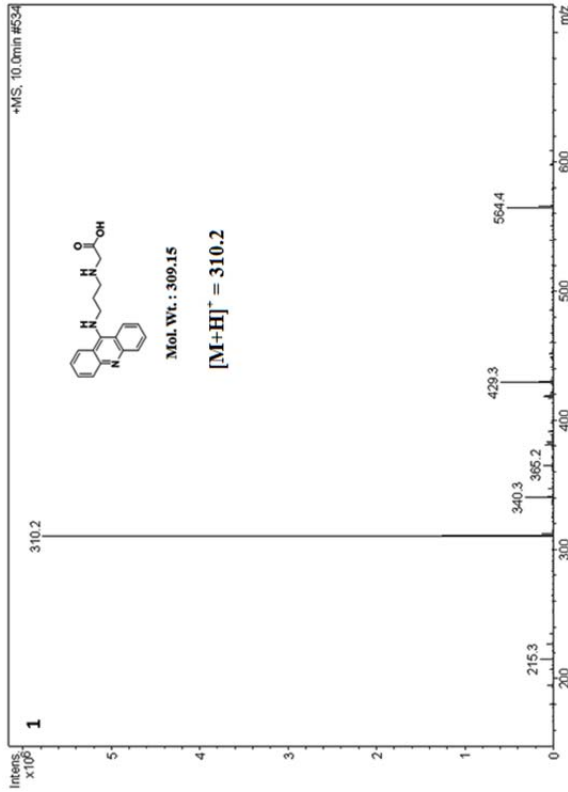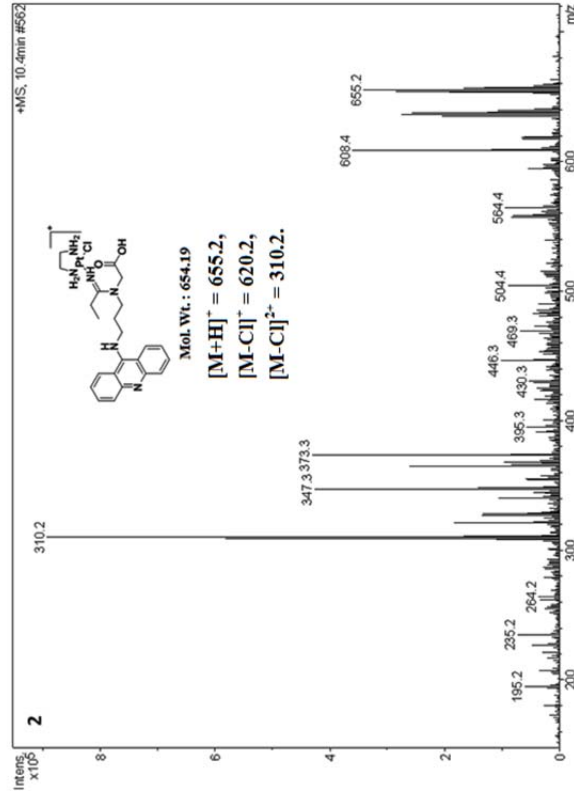

Figure S1.6 LC-ESMS analysis of reaction P1 + A6.

### The Reaction Scheme Of P1-A7

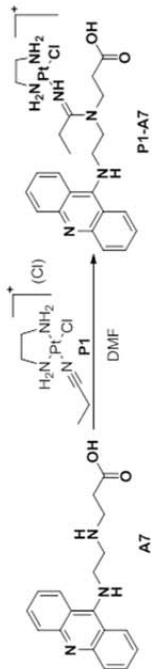

### The LC-MS Analysis Of P1-A7

## Compound Chromatogram Report - MS

Analysis Name: LIB-6016.D Instrument: LC-MSD-Trip-SL Print Date: 06/08/2012 12:20:04 AM  
 Method: SONG-L~1.M Operator: Administrator Acq. Date: 5/12/2012 1:24:20 AM  
 Sample Name: 1-7  
 Analysis Info:

#### Acquisition Parameter:

|                 |             |                       |                   |
|-----------------|-------------|-----------------------|-------------------|
| Mass Range Mode | Std/Normal  | Trap Drive            | 150 m/z           |
| Ion Polarity    | Positive    | Octopole RF Amplitude | 2200 Vpp          |
| Ion Source Type | ESI         | Capillary Exit        | 5 Spectra         |
| Dry Temp (Set)  | 350 °C      | Skimmer               | 200000 µs         |
| Nebulizer (Set) | 50.00 psi   | Oct 1 DC              | 30000             |
| Dry Gas (Set)   | 11.00 l/min | Oct 2 DC              | Charge Control on |

#### Compound List:

| # | RT [min] | Range [min] | Height | Area | Area Frac % |
|---|----------|-------------|--------|------|-------------|
| 1 | 9.2      | 9.1 - 9.5   | 12     | 79   | 74.4        |
| 2 | 10.0     | 9.8 - 10.2  | 4      | 27   | 25.6        |

#### Chromatograms:

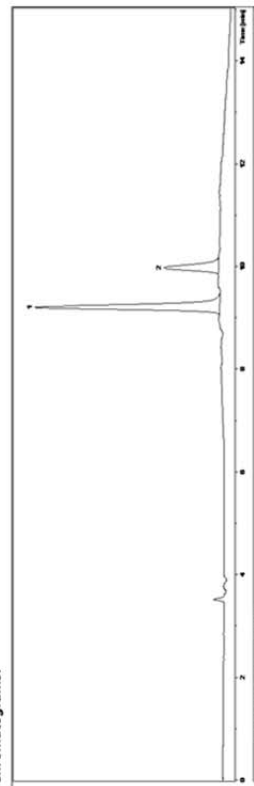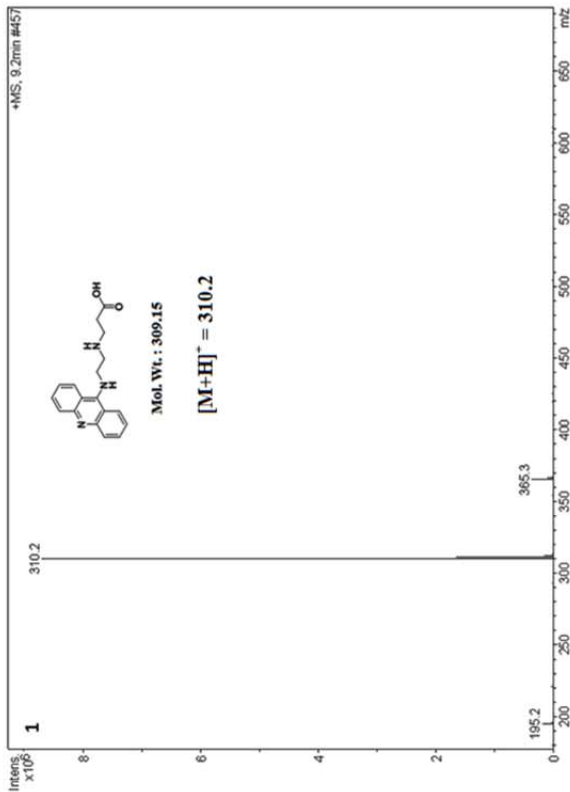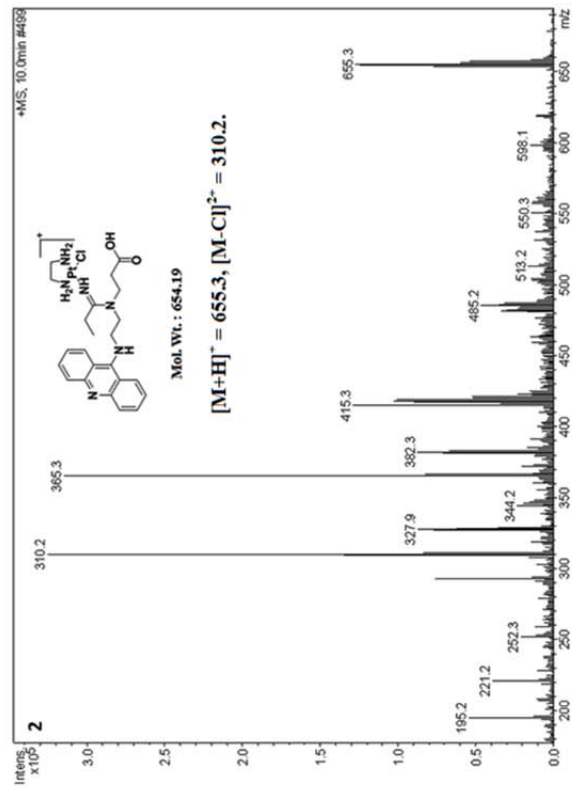

Figure S1.7 LC-ESMS analysis of reaction P1 and A7.

### The Reaction Scheme Of P1-A8

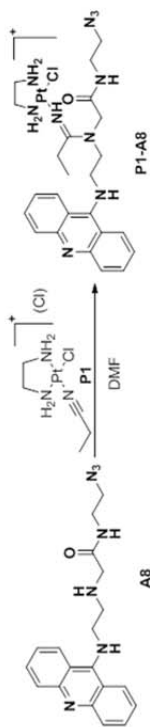

### The LC-MS Analysis Of P1-A8

## Compound Chromatogram Report - MS

**Analysis Name:** LIB-1811.D **Instrument:** LC-MSD-Trap-SL **Print Date:** 06/08/2012 12:21:33 AM  
**Method:** SONG-L-1.M **Operator:** Administrator **Acq. Date:** 5/12/2012 5:21:56 PM  
**Sample Name:** 1-8

#### Analysis Info:

| Mass Range      | Mode        | Std/Normal | Trap Drive            | Scan Begin     | 150 m/z   |
|-----------------|-------------|------------|-----------------------|----------------|-----------|
| Ion Polarity    | Positive    |            | Octopole RF Amplitude | Scan End       | 2200 m/z  |
| Ion Source Type | ESI         |            | Capillary Ext         | Averages       | 5 Spectra |
| Dry Temp (Set)  | 350 °C      |            | Skimmer               | Max. Accu Time | 200000 µs |
| Nebulizer (Set) | 50.00 psi   |            | Oct 1 DC              | ICC Target     | 30000     |
| Dry Gas (Set)   | 11.00 l/min |            | Oct 2 DC              | Charge Control | on        |

#### Compound List:

| # | RT [min] | Range [min] | Height | Area | Area Frac % |
|---|----------|-------------|--------|------|-------------|
| 1 | 9.7      | 9.6 - 9.9   | 8      | 48   | 55.5        |
| 2 | 10.8     | 10.5 - 11.0 | 5      | 39   | 44.5        |

#### Chromatograms:

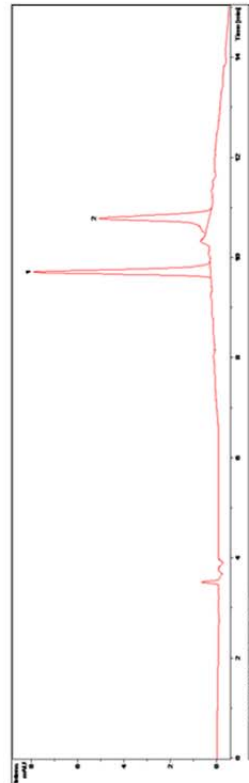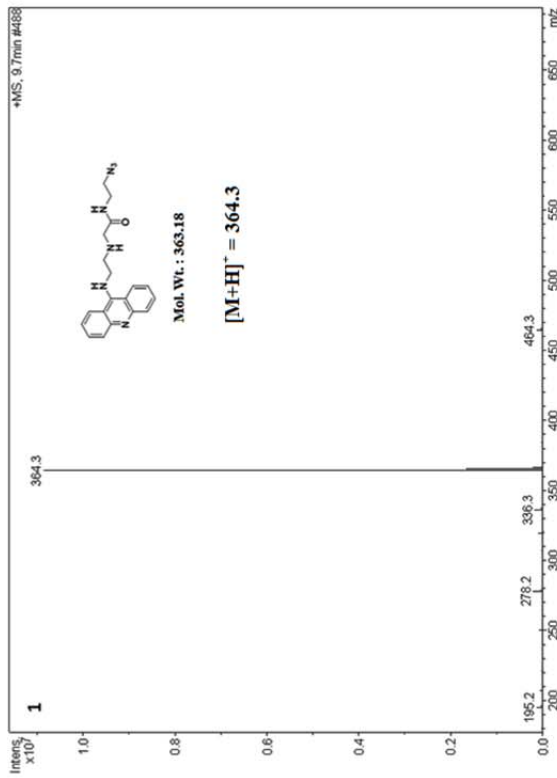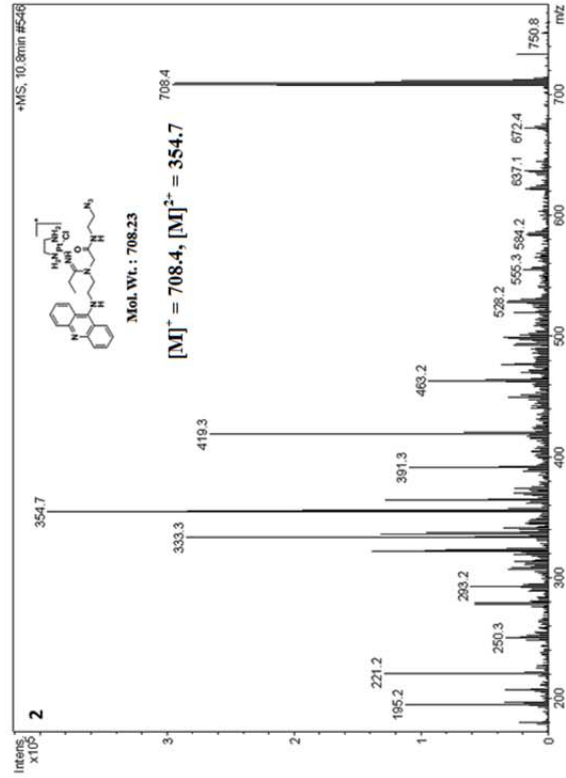

Figure S1.8 LC-ESMS analysis of reaction P1 + A8.

### The Reaction Scheme Of P1-A9

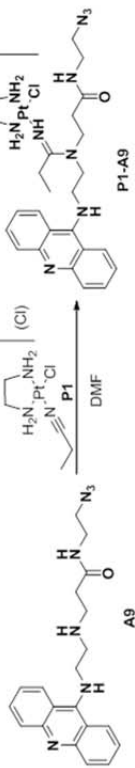

### The LC-MS Analysis Of P1-A9

#### Compound Chromatogram Report - MS

**Analysis Name:** LIB-1825.D    **Instrument:** LC-MSD-Trap-SL    **Print Date:** 06/08/2012 12:23:24 AM  
**Method:** SONG-L-1.M    **Operator:** Administrator    **Acq. Date:** 5/13/2012 12:24:31 AM  
**Sample Name:** 1-9  
**Analysis Info:**

| Acquisition Parameter: |             | Trap Drive |                | Scan Begin |       |
|------------------------|-------------|------------|----------------|------------|-------|
| Mass Range Mode        | Std/Normal  | 52.5       | 150 m/z        | 529.3      | 555.4 |
| Ion Polarity           | Positive    | 200.0 Vpp  | 2200 m/z       | 350.3      |       |
| Ion Source Type        | ESI         | 135.7 Volt | Averages       | 361.8      |       |
| Dry Temp (Set)         | 350 °C      | 40.0 Volt  | Max. Accu Time |            |       |
| Nebulizer (Set)        | 50.00 psi   | Oct 1 DC   | ICC Target     |            |       |
| Dry Gas (Set)          | 11.00 l/min | Oct 2 DC   | Charge Control |            |       |

| Compound List: |          |        |      |             |
|----------------|----------|--------|------|-------------|
| #              | RT [min] | Height | Area | Area Frac % |
| 1              | 9.5      | 4      | 27   | 26.0        |
| 2              | 10.3     | 11     | 77   | 74.0        |

#### Chromatograms:

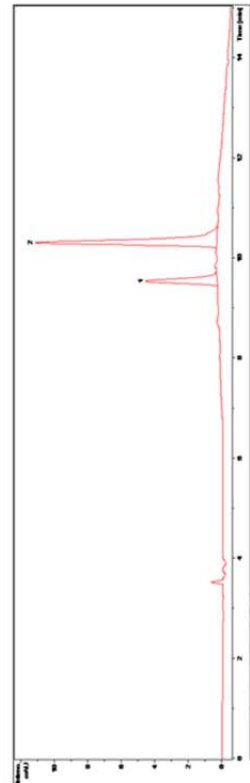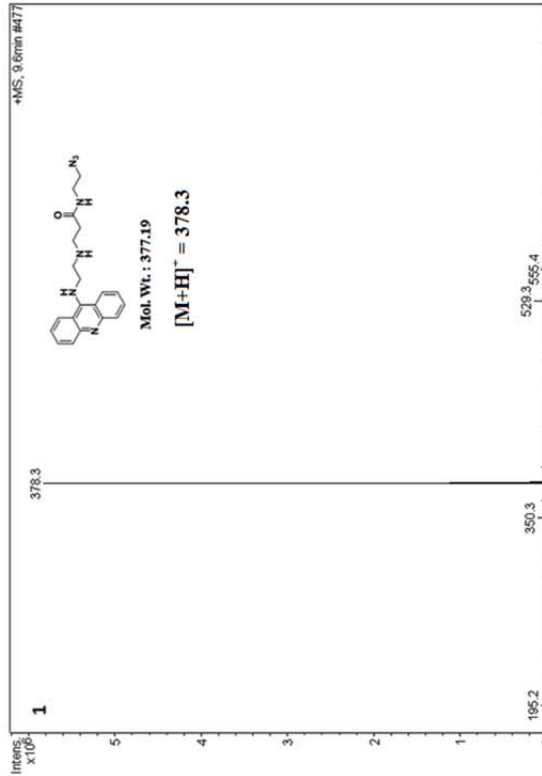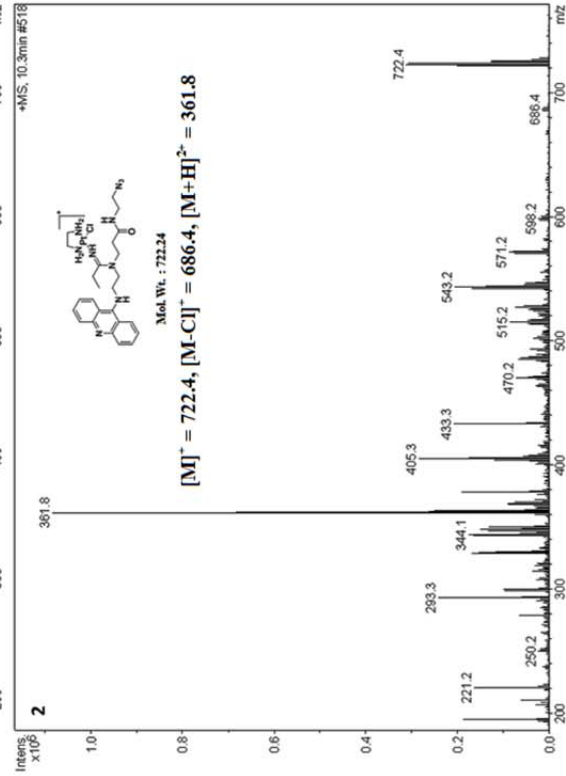

Figure S1.9 LC-ESMS analysis of reaction P1 + A9.

### The Reaction Scheme Of P1-A10

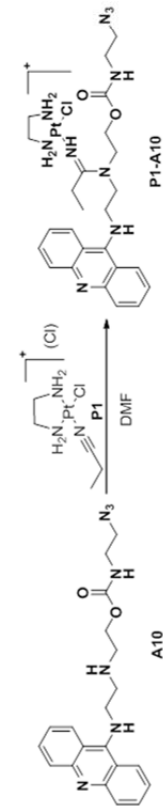

### The LC-MS Analysis Of P1-A10

## Compound Chromatogram Report - MS

**Analysis Name:** LIB91025.D    **Instrument:** LC-MSD-Trap-SL    **Print Date:** 06/08/2012 12:24:39 AM  
**Method:** SONG-L-1.M    **Operator:** Administrator    **Acq. Date:** 5/13/2012 2:58:59 PM  
**Sample Name:** 1-10  
**Analysis Info:**

#### Acquisition Parameter:

|                 |             |                       |           |
|-----------------|-------------|-----------------------|-----------|
| Mass Range Mode | Std/Normal  | Trap Drive            | 150 m/z   |
| Ion Polarity    | Positive    | Octopole RF Amplitude | 2200 Vpp  |
| Ion Source Type | ESI         | Capillary Exit        | 5 Spectra |
| Dry Temp (Set)  | 350 °C      | Skimmer               | 200000 µs |
| Nebulizer (Set) | 50.00 psi   | Oct 1 DC              | 30000     |
| Dry Gas (Set)   | 11.00 l/min | Oct 2 DC              | on        |

#### Compound List:

| # | RT [min] | Range [min] | Height | Area | Area Frac % |
|---|----------|-------------|--------|------|-------------|
| 1 | 9.6      | 9.4 - 9.9   | 5      | 36   | 45.2        |
| 2 | 10.3     | 10.1 - 10.5 | 6      | 44   | 54.8        |

#### Chromatograms:

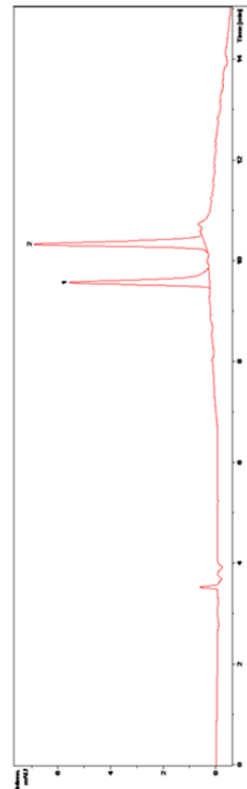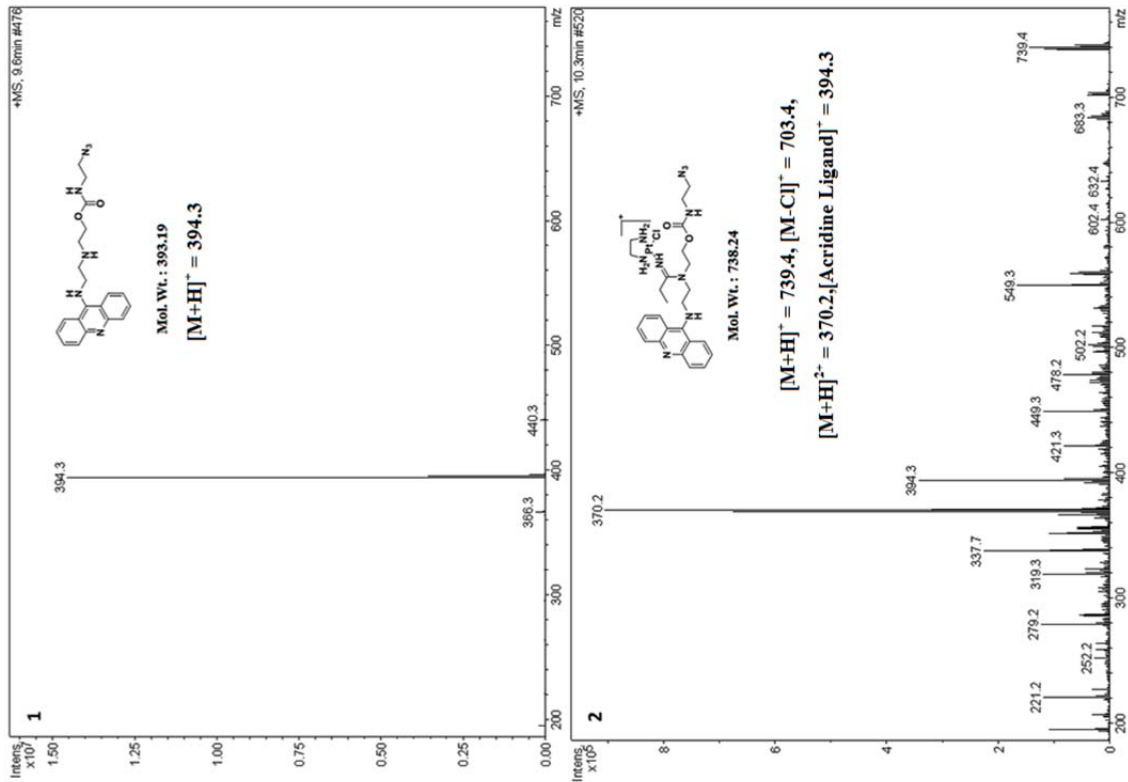

Figure S1.10 LC-ESMS analysis of reaction P1 + A10.

The Reaction Scheme of P2-A1

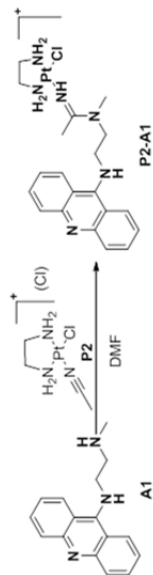

The LC-MS Analysis Of P2-A1

Compound Chromatogram Report - MS

Analysis Name: 05121211.D Instrument: LC-MSD-Trap-SL Print Date: 06/08/2012 12:26:18 AM  
 Method: SONG-L-1.M Operator: Administrator Acq. Date: 5/10/2012 6:49:23 PM  
 Sample Name: 2-1  
 Analysis Info:

Acquisition Parameter:

|                 |             |                       |                          |
|-----------------|-------------|-----------------------|--------------------------|
| Mass Range Mode | Std/Normal  | Trap Drive            | 150 m/z                  |
| Ion Polarity    | Positive    | Octopole RF Amplitude | 2200 Vpp                 |
| Ion Source Type | ESI         | Capillary Exit        | 5 Spectra                |
| Dry Temp (Set)  | 350 °C      | Skimmer               | Max. Accu Time 200000 µs |
| Nebulizer (Set) | 50.00 psi   | Oct 1 DC              | ICC Target 30000         |
| Dry Gas (Set)   | 11.00 l/min | Oct 2 DC              | Charge Control on        |

Compound List:

| # | RT [min] | Range [min] | Height | Area | Area Frac % |
|---|----------|-------------|--------|------|-------------|
| 1 | 9.5      | 9.4-9.7     | 19     | 121  | 100.0       |

Chromatograms:

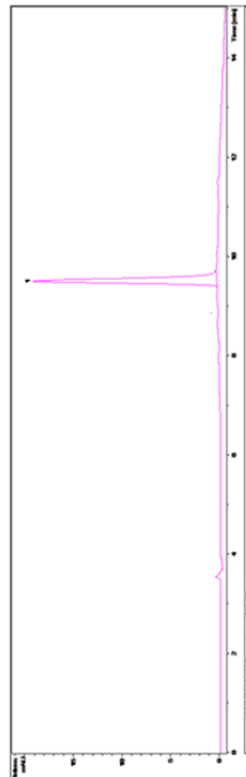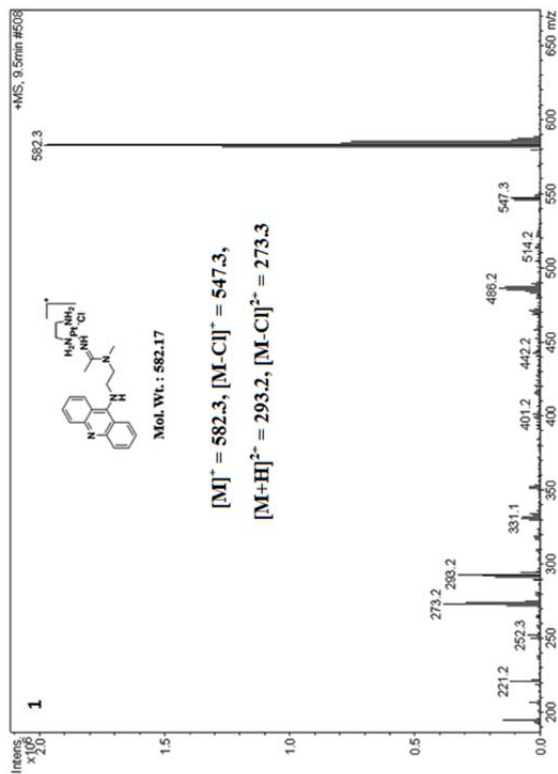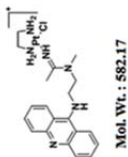

Mol. Wt.: 582.17

$[M]^+ = 582.3$ ,  $[M-CI]^+ = 547.3$ ,  
 $[M+H]^2+ = 293.2$ ,  $[M-CI]^2+ = 273.3$

Figure S1.11. LC-ESMS analysis of reaction P2 + A1.

### The Reaction Scheme Of P2-A2

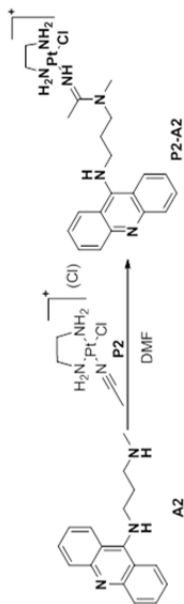

### The LC-MS Analysis Of P2-A2

#### Compound Chromatogram Report - MS

Analysis Name: 05121234.D Instrument: LC-MSD-Trip-SL Print Date: 06/08/2012 12:27:35 AM  
 Method: SONG-L-1.M Operator: Administrator Acq. Date: 5/10/2012 11:27:01 PM  
 Sample Name: 2-2  
 Analysis Info:

Acquisition Parameter:

|                 |             |                       |            |                |           |
|-----------------|-------------|-----------------------|------------|----------------|-----------|
| Mass Range Mode | Std/Normal  | Trap Drive            | 52.5       | Scan Begin     | 150 m/z   |
| Ion Polarity    | Positive    | Octopole RF Amplitude | 200.0 Vpp  | Scan End       | 2200 m/z  |
| Ion Source Type | ESI         | Capillary Exit        | 135.7 Volt | Averages       | 5 Spectra |
| Dry Temp (Set)  | 350 °C      | Skimmer               | 40.0 Volt  | Max. Accu Time | 200000 µs |
| Nebulizer (Set) | 50.00 psi   | Oct 1 DC              | 12.00 Volt | ICC Target     | 30000     |
| Dry Gas (Set)   | 11.00 l/min | Oct 2 DC              | 1.73 Volt  | Charge Control | on        |

#### Compound List:

| # | RT [min] | Range [min] | Height | Area | Area Frac % |
|---|----------|-------------|--------|------|-------------|
| 1 | 9.1      | 9.0 - 9.3   | 1      | 9    | 7.5         |
| 2 | 9.7      | 9.6 - 10.0  | 17     | 115  | 92.5        |

#### Chromatograms:

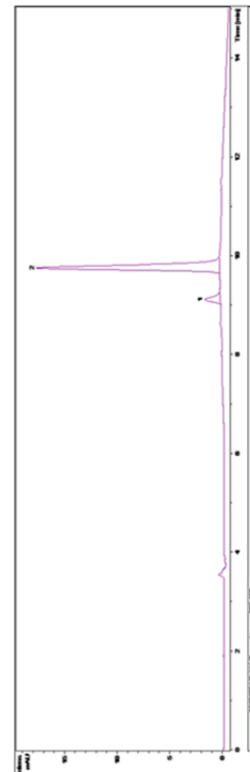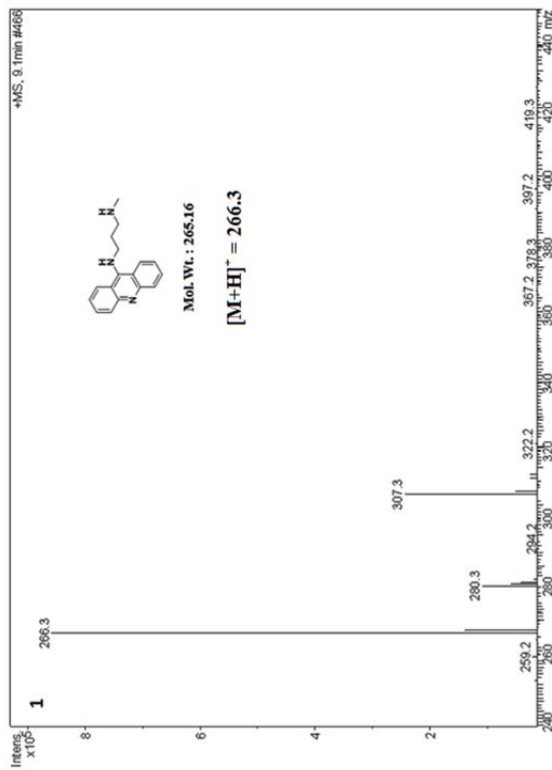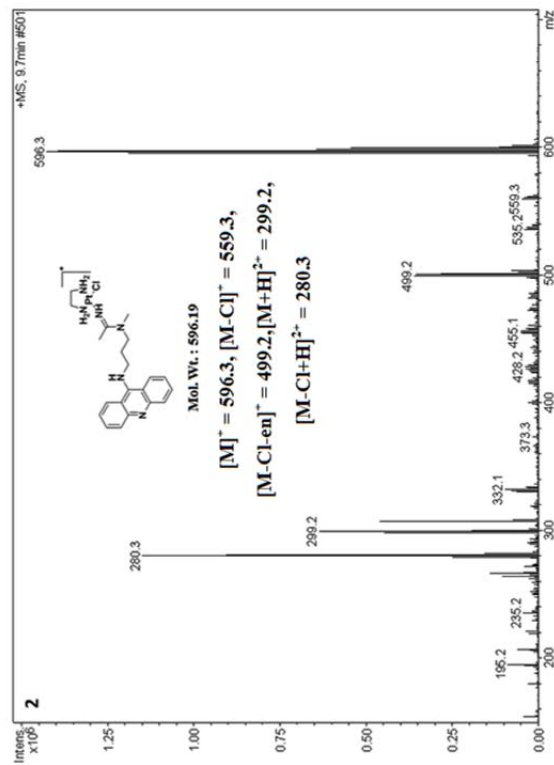

Figure S1.12. LC-ESMS analysis of reaction P2 + A2.



### The Reaction Scheme Of P2-A3

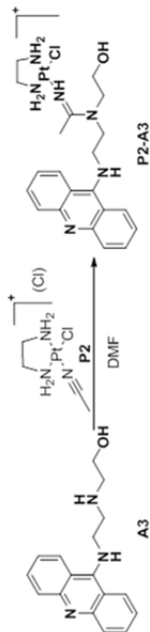

### The LC-MS Analysis Of P2-A3

#### Compound Chromatogram Report - MS

Analysis Name: 05121241.D Instrument: LC-MSD-Trap-SL Print Date: 06/08/2012 12:29:22 AM  
 Method: SONG-L-1.M Operator: Administrator Acq. Date: 5/11/2012 2:44:42 AM  
 Sample Name: 2-3  
 Analysis Info:

Acquisition Parameter:

|                 |             |                |            |
|-----------------|-------------|----------------|------------|
| Mass Range Mode | Std/Normal  | Trap Drive     | 150 m/z    |
| Ion Polarity    | Positive    | Scan Begin     | 2200 m/z   |
| Ion Source Type | ESI         | Scan End       | 200.0 Vpp  |
| Dry Temp (Set)  | 350 °C      | Capillary Ext  | 135.7 Volt |
| Nebulizer (Set) | 50.00 psi   | Skimmer        | 40.0 Volt  |
| Dry Gas (Set)   | 11.00 l/min | Oct 1 DC       | 12.00 Volt |
|                 |             | Oct 2 DC       | 1.73 Volt  |
|                 |             | Charge Control | on         |

| Compound List: |          |             |        |      |             |
|----------------|----------|-------------|--------|------|-------------|
| #              | RT [min] | Range [min] | Height | Area | Area Frac % |
| 1              | 9.5      | 9.3 - 9.7   | 15     | 101  | 100.0       |

Chromatograms:

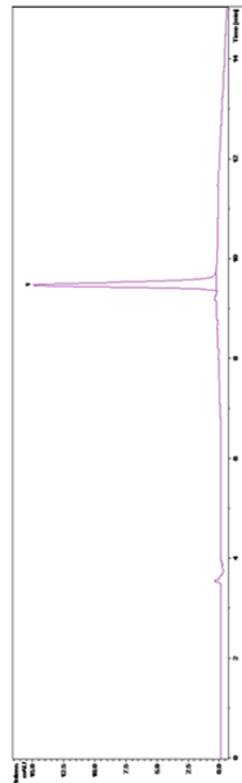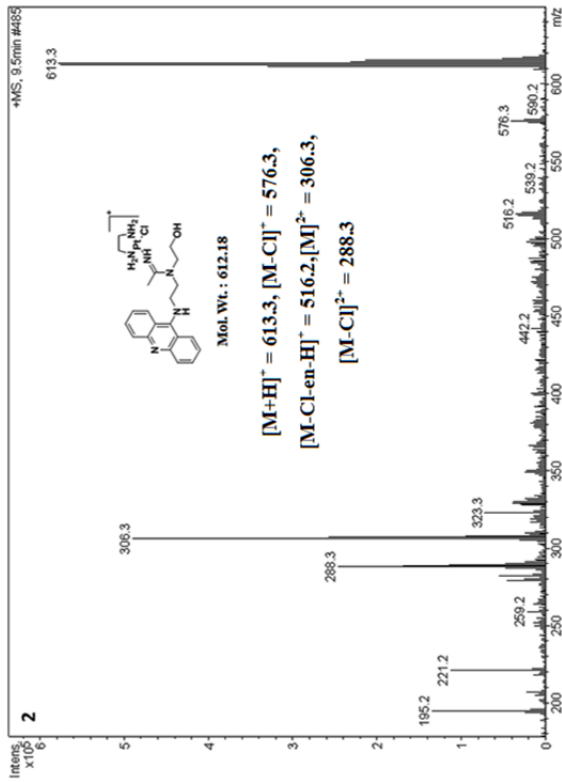

Mol. Wt.: 612.18

$[M+H]^+ = 613.3$ ,  $[M-Cl]^- = 576.3$ ,

$[M-Cl-en-H]^+ = 516.2$ ,  $[M]^{2+} = 306.3$ ,

$[M-Cl]^{2-} = 288.3$

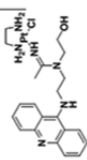

Figure S1.13. LC-ESMS analysis of reaction P2 + A3.

### The Reaction Scheme Of P2-A4

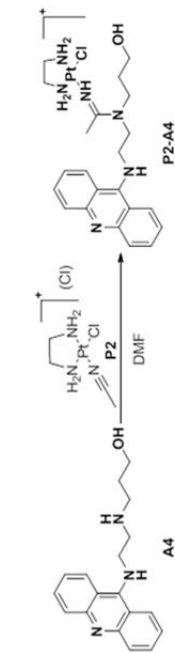

### The LC-MS Analysis Of P2-A4

### Compound Chromatogram Report - MS

**Analysis Name:** LIB-1411.D **Instrument:** LC-MSD-Trap-SL **Print Date:** 06/08/2012 04:44:46 PM  
**Method:** SONG-L-1.m **Operator:** Administrator **Acq. Date:** 5/12/2012 3:14:48 PM  
**Sample Name:** 2-4  
**Analysis Info:**

| Acquisition Parameter: |             | Trap Drive            |            | Scan Begin     |           |
|------------------------|-------------|-----------------------|------------|----------------|-----------|
| Mass Range Mode        | Std/Normal  | 52.5                  | 150 m/z    | Scan End       | 2200 m/z  |
| Ion Polarity           | Positive    | Octopole RF Amplitude | 200.0 Vpp  | Averages       | 5 Spectra |
| Ion Source Type        | ESI         | Capillary Exit        | 135.7 Volt | Max. Accu Time | 200000 µs |
| Dry Temp (Set)         | 350 °C      | Skimmer               | 40.0 Volt  | ICC Target     | 30000     |
| Nebulizer (Set)        | 50.00 psi   | Oct 1 DC              | 12.00 Volt | Charge Control | on        |
| Dry Gas (Set)          | 11.00 l/min | Oct 2 DC              | 1.73 Volt  |                |           |

| Compound List: |          |             |      |             |      |
|----------------|----------|-------------|------|-------------|------|
| #              | RT [min] | Range [min] | Area | Area Frac % |      |
| 1              | 8.9      | 8.7 - 9.0   | 2    | 13          | 8.8  |
| 2              | 9.6      | 9.4 - 9.8   | 20   | 133         | 91.2 |

### Chromatograms:

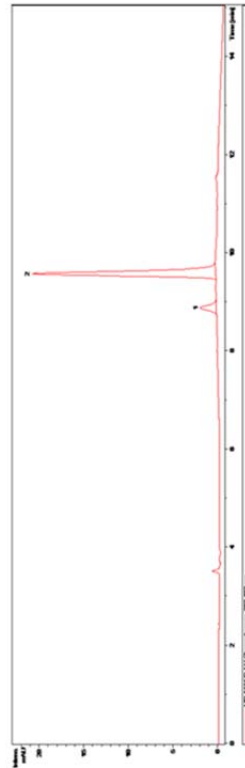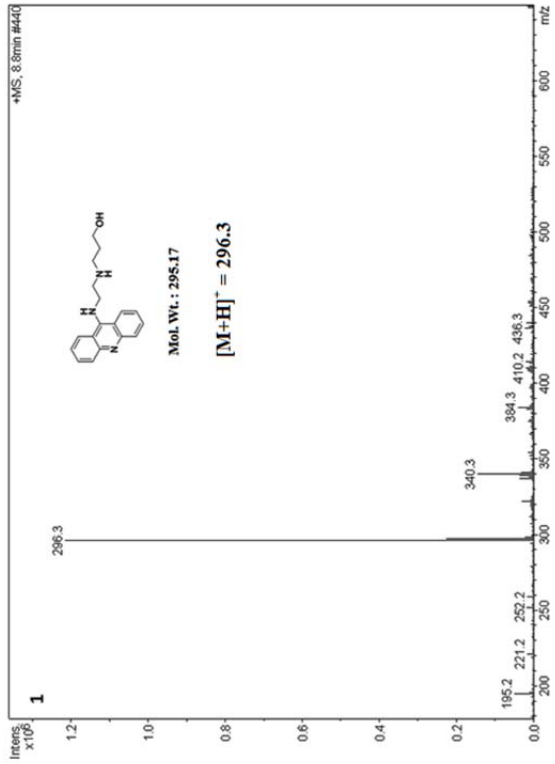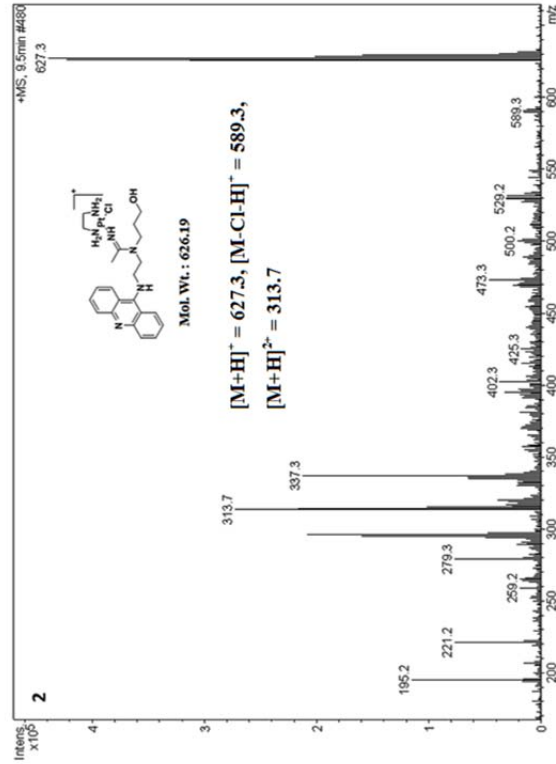

Figure S1.14. LC-ESMS analysis of reaction P2 + A4.

### The Reaction Scheme Of P2-A5

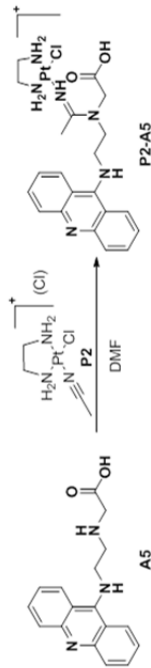

### The LC-MS Analysis Of P2-A5

### Compound Chromatogram Report - MS

**Analysis Name:** LIB12011.D **Instrument:** LC-HSD-Trap-SL **Print Date:** 06/08/2012 04:49:11 PM  
**Method:** SONG-L-1.M **Operator:** Administrator **Acq. Date:** 5/11/2012 9:23:01 PM  
**Sample Name:** 2-5-1  
**Analysis Info:**

**Acquisition Parameter:**  
 Mass Range Mode: Std/Normal **Trap Drive:** 150 m/z  
 Ion Polarity: Positive **Octopole RF Amplitude:** 52.5 **Scan Begin:** 2200 m/z  
 Ion Source Type: ESI **Capillary Exit:** 200.0 Vpp **Scan End:** 2200 m/z  
 Dry Temp (Set): 350 °C **Skimmer:** 135.7 Volt **Averages:** 5 Spectra  
 Nebulizer (Set): 50.00 psi **Oct 1 DC:** 40.0 Volt **Max. Accu Time:** 200000 µs  
 Dry Gas (Set): 11.00 l/min **Oct 2 DC:** 1.73 Volt **Charge Control:** on

| Compound List: | # | RT [min] | Range [min] | Height | Area | Area Frac % |
|----------------|---|----------|-------------|--------|------|-------------|
|                | 1 | 9.7      | 9.6 - 9.9   | 9      | 56   | 46.1        |
|                | 2 | 10.0     | 9.9 - 10.3  | 8      | 66   | 53.9        |

**Chromatograms:**

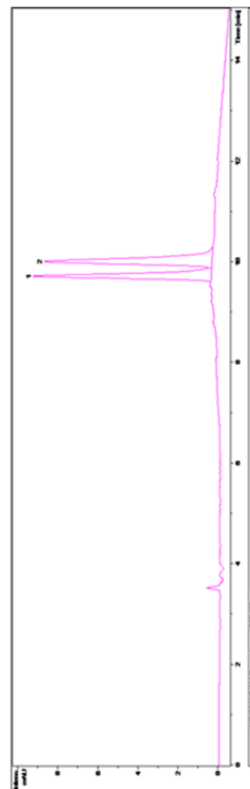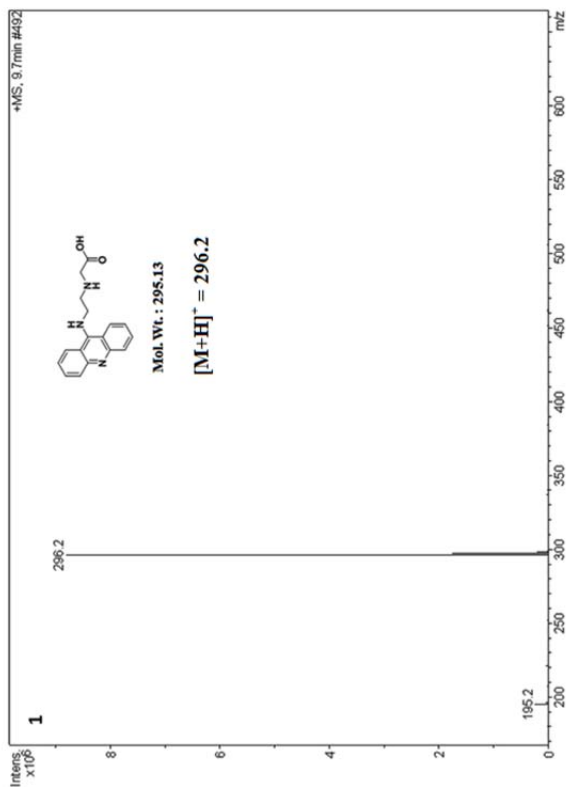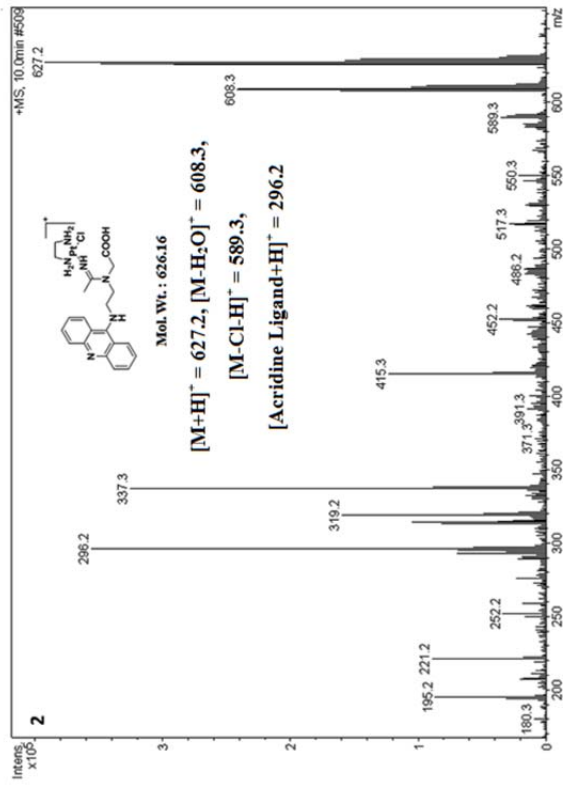

Figure S1.15. LC-ESMS analysis of reaction P2 + A5.

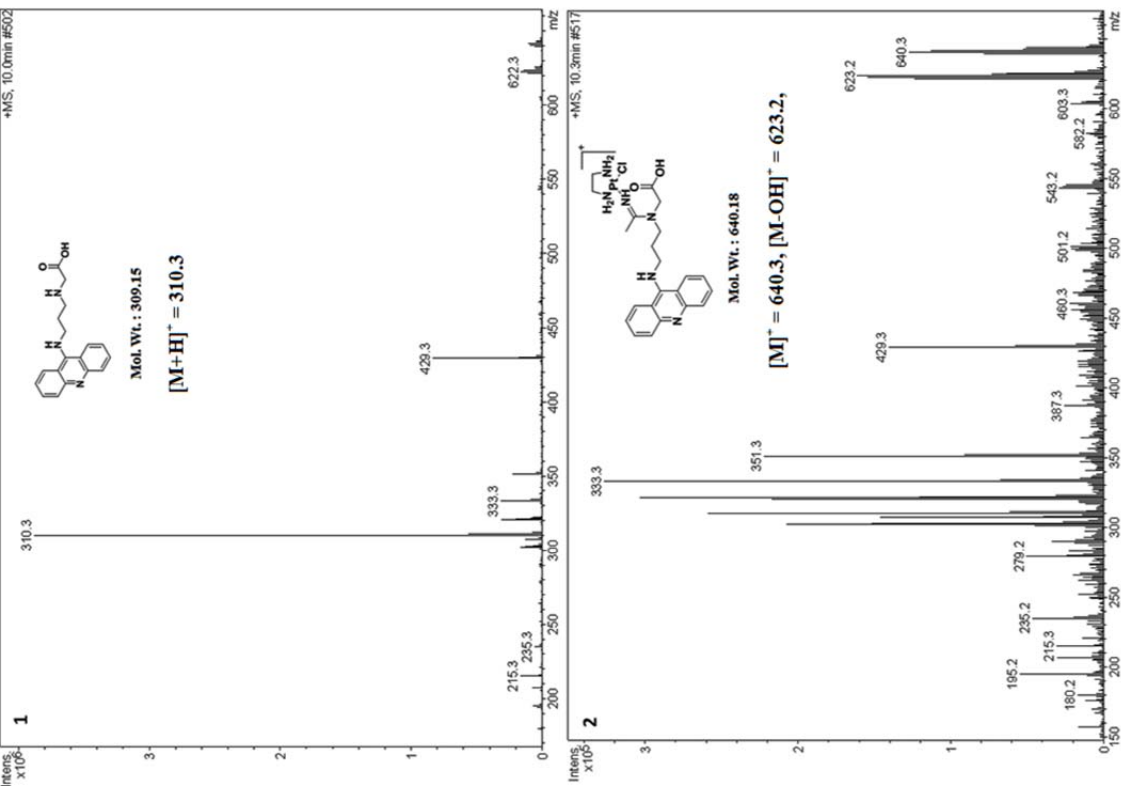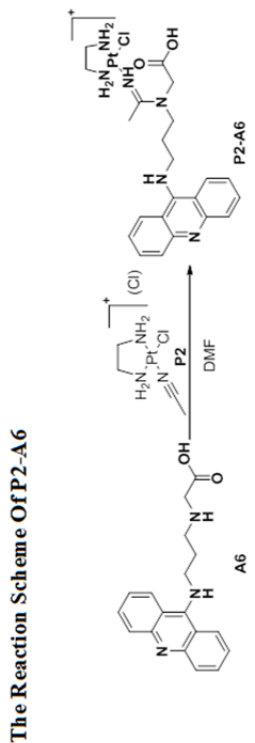

**The LC-MS Analysis Of P2-6**

**Compound Chromatogram Report - MS**

**Analysis Name:** LIB-6011.D **Instrument:** LC-MSD-Trap-SL **Print Date:** 06/08/2012 04:50:33 PM  
**Method:** SONG-L-1.M **Operator:** Administrator **Acq. Date:** 5/11/2012 11:34:04 PM  
**Sample Name:** 2-6  
**Analysis Info:**

**Acquisition Parameter:**

|                 |            |                |           |
|-----------------|------------|----------------|-----------|
| Mass Range Mode | Sid/Normal | Trap Drive     | 150 m/z   |
| Ion Polarity    | Positive   | Scan Begin     | 2200 m/z  |
| Ion Source Type | ESI        | Scan End       | 5 Spectra |
| Dry Temp (Set)  | 350 °C     | Averages       | 200000 µs |
| Nebulizer (Set) | 50.00 psi  | Max. Accu Time | 30000     |
| Dry Gas (Set)   | 11.00 /min | ICC Target     | on        |
|                 |            | Charge Control | on        |

**Compound List:**

| # | RT [min] | Range [min] | Height | Area | Area Frac % |
|---|----------|-------------|--------|------|-------------|
| 1 | 10.0     | 9.9 - 10.1  | 4      | 29   | 26.2        |
| 2 | 10.3     | 10.1 - 10.5 | 11     | 81   | 73.8        |

**Chromatograms:**

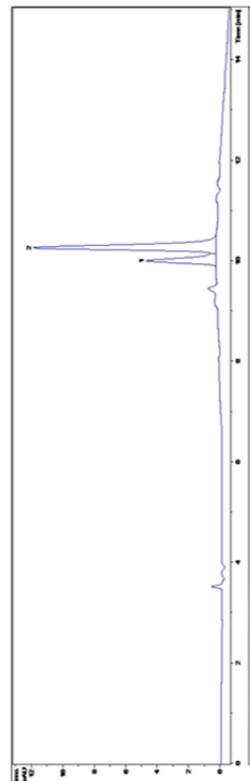

**Figure S1.16. LC-ESMS analysis of reaction P2 + A6.**

### The Reaction Scheme Of P2-A7

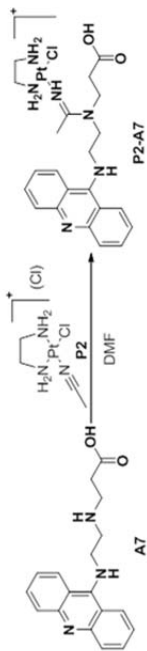

### The LC-MS Analysis Of P2-A7

### Compound Chromatogram Report - MS

Analysis Name: LIB-7002.D Instrument: LC-MSD-Trip-SL Print Date: 06/08/2012 04:51:47 PM  
 Method: SONG-Lv-1.M Operator: Administrator Acq. Date: 5/12/2012 9:37:31 AM  
 Sample Name: 2-7  
 Analysis Info:

Acquisition Parameter:

|                 |             |                       |            |
|-----------------|-------------|-----------------------|------------|
| Mass Range Mode | Std/Normal  | Trap Drive            | 150 m/z    |
| Ion Polarity    | Positive    | Octopole RF Amplitude | 2200 Vpp   |
| Ion Source Type | ESI         | Capillary Exit        | 5 Spectra  |
| Dry Temp (Set)  | 350 °C      | Skimmer               | 40.0 Volt  |
| Nebulizer (Set) | 50.00 psi   | Oct 1 DC              | 12.00 Volt |
| Dry Gas (Set)   | 11.00 l/min | Oct 2 DC              | 1.73 Volt  |
|                 |             | Charge Control        | on         |

| Compound List: | # | RT [min] | Range [min] | Height | Area | Area Frac. % |
|----------------|---|----------|-------------|--------|------|--------------|
|                | 1 | 9.2      | 9.0 - 9.4   | 11     | 83   | 36.0         |
|                | 2 | 9.7      | 9.6 - 9.9   | 21     | 147  | 64.0         |

Chromatograms:

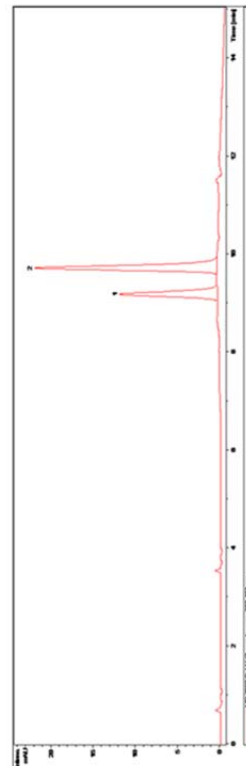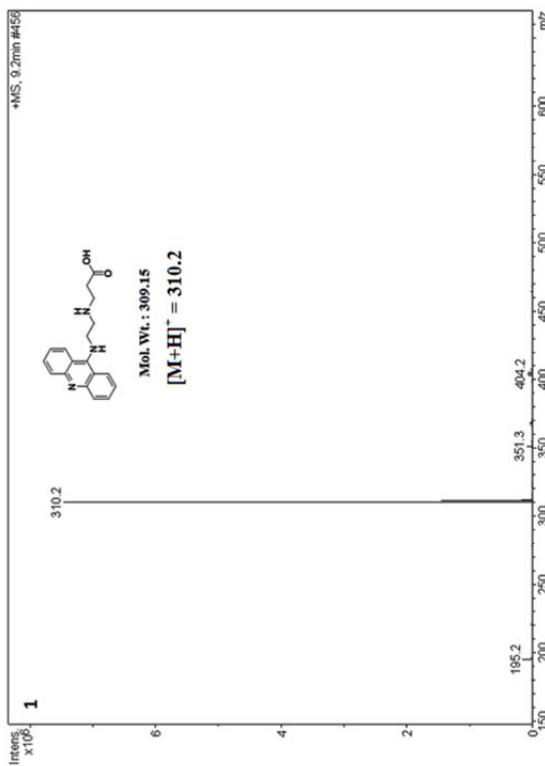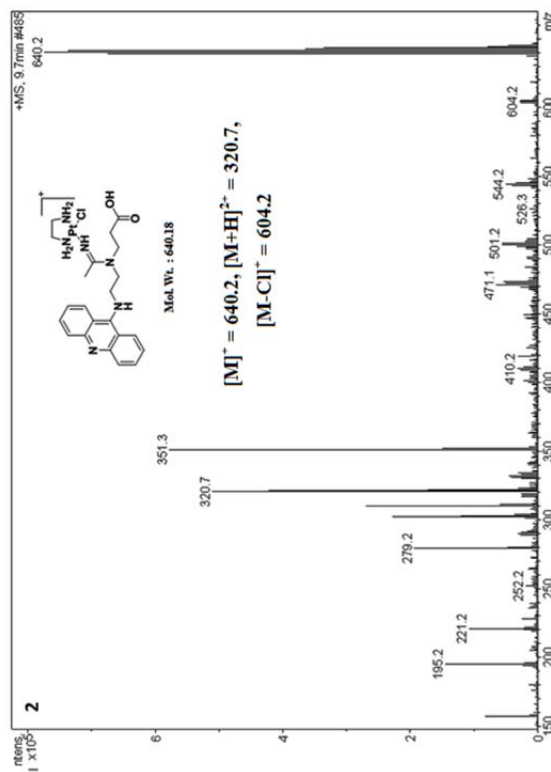

Figure S1.17 LC-ESMS analysis of reaction P2 + A7.

### The Reaction Scheme Of P2-A8

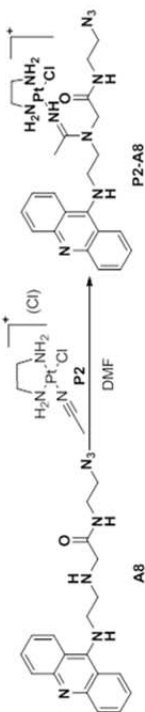

### The LC-MS Analysis Of P2-A8

### Compound Chromatogram Report - MS

**Analysis Name:** LIB-1820.D **Instrument:** LC-MSD-Trap-SL **Print Date:** 06/08/2012 04:53:16 PM  
**Method:** SONG-L-1.M **Operator:** Administrator **Acq. Date:** 5/12/2012 10:34:40 PM  
**Sample Name:** 2-8

**Acquisition Parameter:**  
 Mass Range Mode: Std/Normal **Trap Drive:** 150 m/z  
 Ion Polarity: Positive **Octopole RF Amplitude:** 52.5  
 Ion Source Type: ESI **Capillary Exit:** 200.0 Vpp  
 Dry Temp (Set): 350 °C **Skimmer:** 135.7 Volt  
 Nebulizer (Set): 50.00 psi **Oct 1 DC:** 40.0 Volt  
 Dry Gas (Set): 11.00 l/min **Oct 2 DC:** 12.00 Volt  
**Charge Control:** on

| Compound List: |          |             |        |      |             |
|----------------|----------|-------------|--------|------|-------------|
| #              | RT [min] | Range [min] | Height | Area | Area Frac % |
| 1              | 9.6      | 9.5 - 9.9   | 6      | 36   | 41.9        |
| 2              | 10.4     | 10.2 - 10.6 | 7      | 50   | 58.1        |

### Chromatograms:

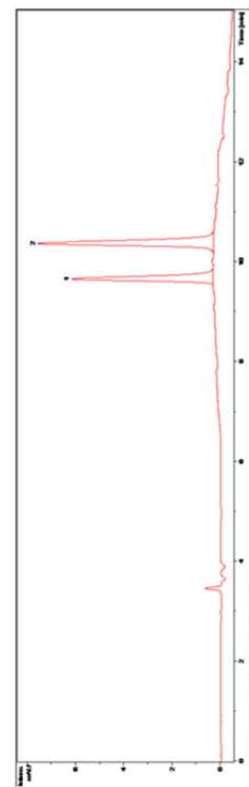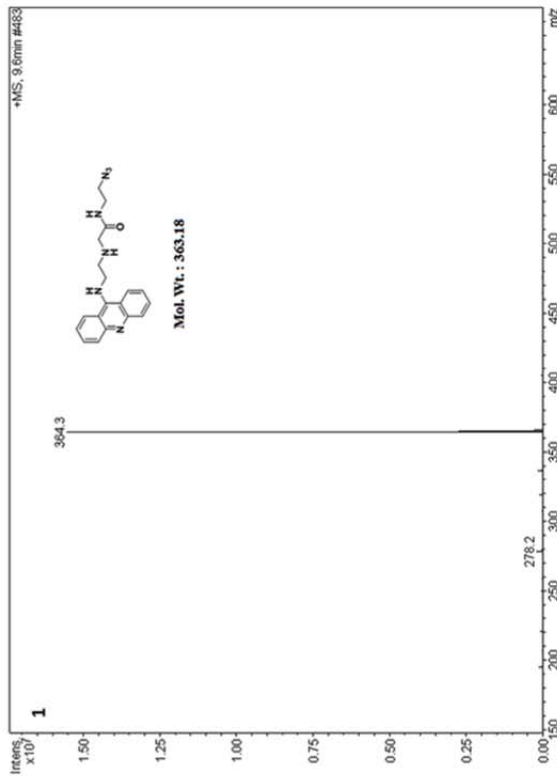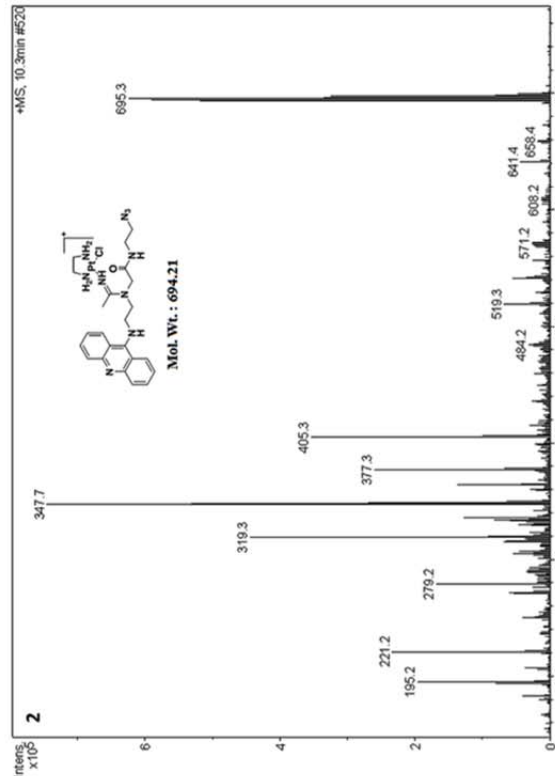

Figure S1.18 LC-ESMS analysis of reaction P2 + A8.

### The Reaction Scheme Of P2-A9

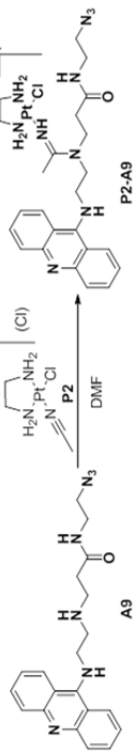

### The LC-MS Analysis Of P2-A9

### Compound Chromatogram Report - MS

**Analysis Name:** LIB91020.D **Instrument:** LC-MSD-Trip-SL **Print Date:** 06/08/2012 04:54:48 PM  
**Method:** SONG-L-1.M **Operator:** Administrator **Acq. Date:** 5/13/2012 1:08:56 PM  
**Sample Name:** 2-9  
**Analysis Info:**

**Acquisition Parameter:**  
 Mass Range Mode: Std/Normal **Trap Drive:** 150 m/z  
 Ion Polarity: Positive **Octopole RF Amplitude:** 52.5 **Scan Begin:** 2200 m/z  
 Ion Source Type: ESI **Capillary Exit:** 200.0 Vpp **Averages:** 5 Spectra  
 Dry Temp (Set): 350 °C **Skimmer:** 40.0 Volt **Max. Accu Time:** 200000 µs  
 Nebulizer (Set): 50.00 psi **Oct 1 DC:** 12.00 Volt **ICC Target:** 30000  
 Dry Gas (Set): 11.00 l/min **Oct 2 DC:** 1.73 Volt **Charge Control:** on

**Compound List:**

| # | RT [min] | Range [min] | Height | Area | Area Frac % |
|---|----------|-------------|--------|------|-------------|
| 1 | 9.5      | 9.3 - 9.6   | 3      | 22   | 17.0        |
| 2 | 10.0     | 9.9 - 10.3  | 15     | 106  | 83.0        |

**Chromatograms:**

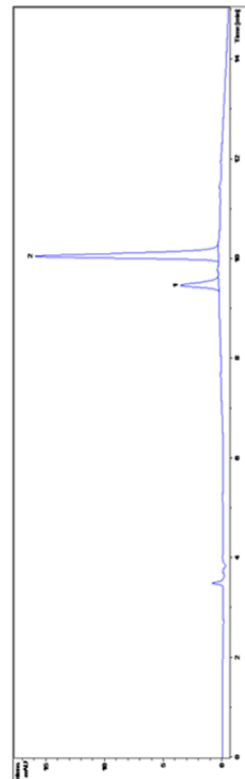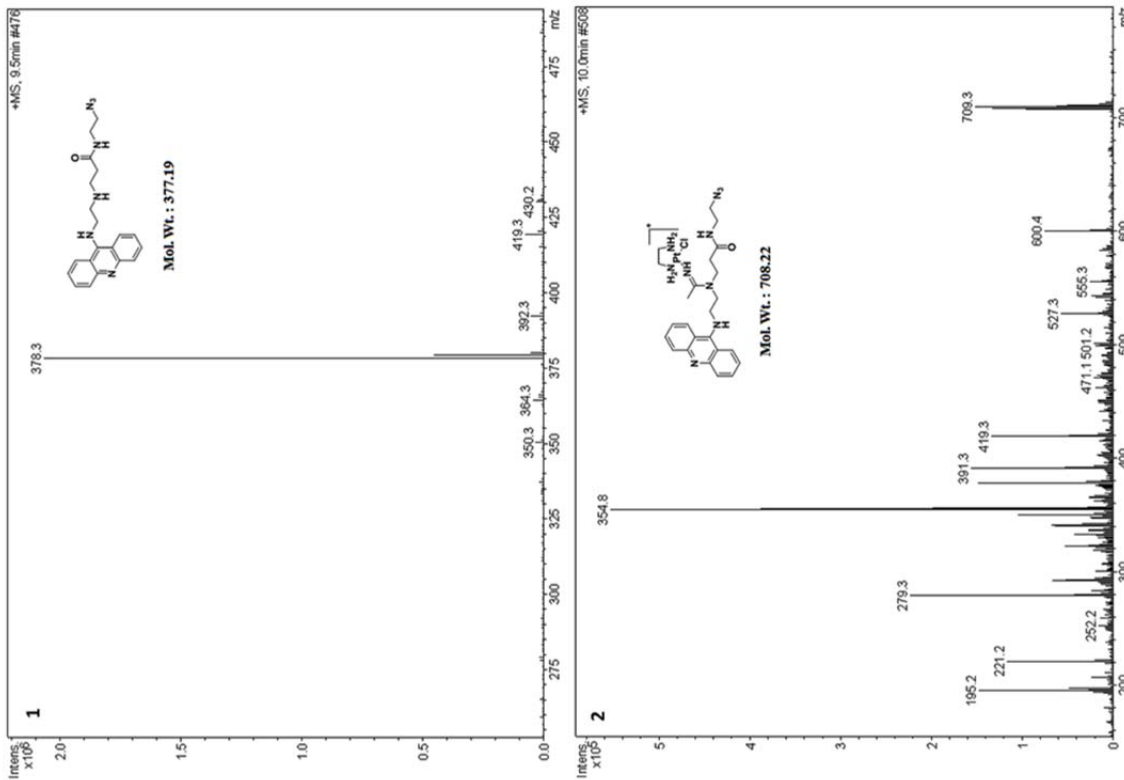

Figure S1.19 LC-ESMS analysis of reaction P2 + A9.

**The Reaction Scheme of P2-A10**

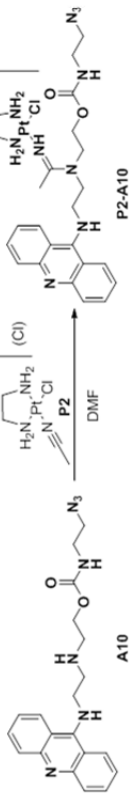

**The LC-MS Analysis of P2-A10**

**Compound Chromatogram Report - MS**

Analysis Name: LIB91026.D Instrument: LC-MSD-Trip-SL Print Date: 06/08/2012 04:56:33 PM  
 Method: SONG-L-1.M Operator: Administrator Acq. Date: 5/13/2012 3:21:18 PM  
 Sample Name: 2-10  
 Analysis Info:

Acquisition Parameter: Trap Drive 150 m/z Scan Begin  
 Mass Range Mode Std/Normal 52.5 Scan End 2200 m/z  
 Ion Polarity Positive 200.0 Vpp Octopole RF Amplitude  
 Ion Source Type ESI 135.7 Volt Capillary Exit Averages 5 Spectra  
 Dry Temp (Set) 350 °C Skimmer 40.0 Volt Max. Accu. Time 200000 µs  
 Nebulizer (Set) 50.00 psi Oct 1 DC 12.00 Volt ICC Target 30000  
 Dry Gas (Set) 11.00 l/min Oct 2 DC 1.73 Volt Charge Control on

**Compound List:**

| # | RT [min] | Range [min] | Height | Area | Area Frac % |
|---|----------|-------------|--------|------|-------------|
| 1 | 9.6      | 9.4 - 9.8   | 4      | 29   | 30.8        |
| 2 | 10.2     | 10.0 - 10.4 | 9      | 64   | 69.2        |

Chromatograms:

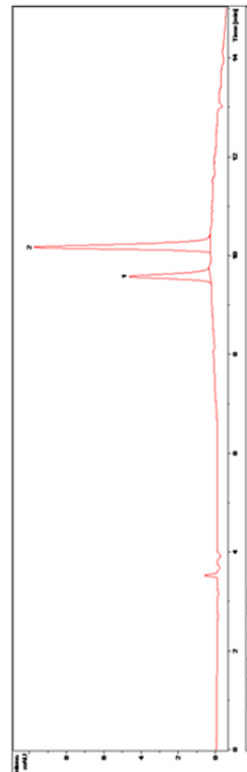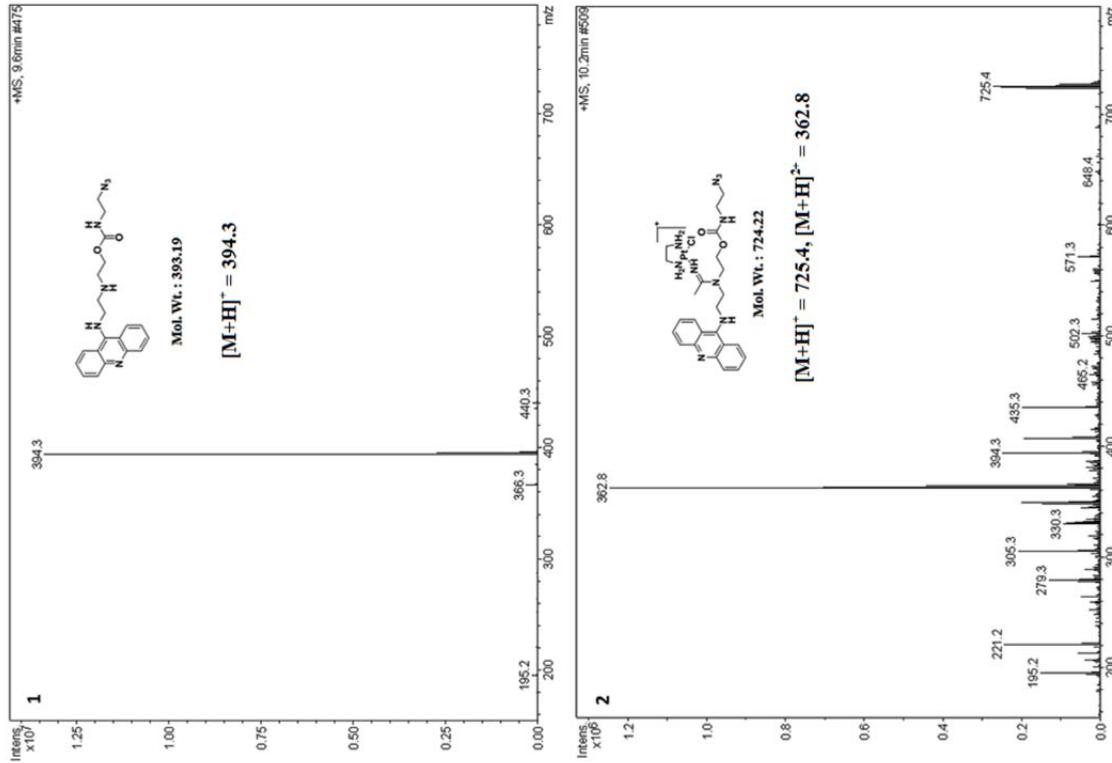

**Figure S1.20 LC-ESMS analysis of reaction P2 + A10.**



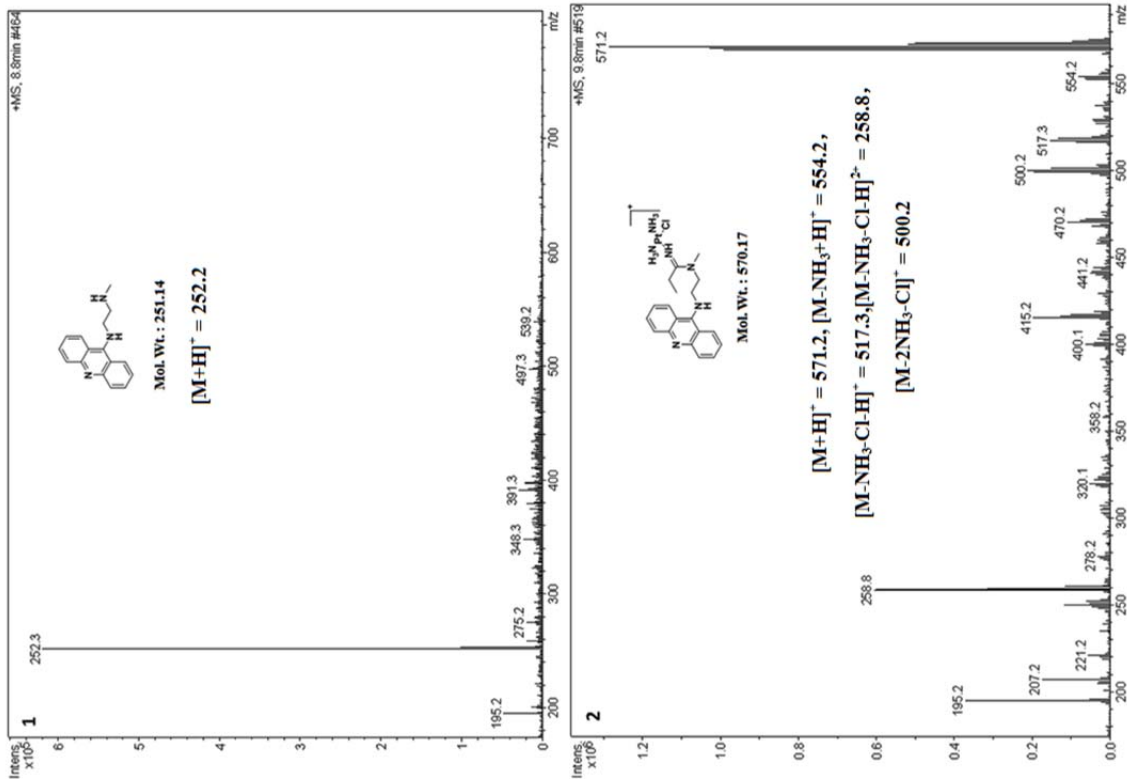

### The Reaction Scheme Of P3-A1

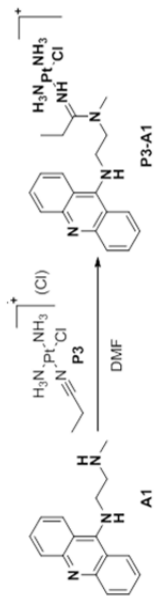

### The LC-MS Analysis Of P3-A1

### Compound Chromatogram Report - MS

**Analysis Name:** 05121212.D **Instrument:** LC-MSD-Trip-SL **Print Date:** 06/08/2012 05:18:51 PM  
**Method:** SONG-L-1.M **Operator:** Administrator **Acq. Date:** 5/10/2012 7:14:02 PM  
**Sample Name:** 3-1  
**Analysis Info:**

| Acquisition Parameter: |             |
|------------------------|-------------|
| Mass Range Mode        | Std/Normal  |
| Ion Polarity           | Positive    |
| Ion Source Type        | ESI         |
| Dry Temp (Set)         | 350 °C      |
| Nebulizer (Set)        | 50.00 psi   |
| Dry Gas (Set)          | 11.00 l/min |
| Trap Drive             | 52.5        |
| Octopole RF Amplitude  | 200.0 Vpp   |
| Capillary Exit         | 135.7 Volt  |
| Skimmer                | 40.0 Volt   |
| Oct 1 DC               | 12.00 Volt  |
| Oct 2 DC               | 1.73 Volt   |
| Scan Begin             | 150 m/z     |
| Scan End               | 2200 m/z    |
| Averages               | 5 Spectra   |
| Max. Accu Time         | 2000000 µs  |
| ICC Target             | 30000       |
| Charge Control         | on          |

| Compound List: |             |        |       |
|----------------|-------------|--------|-------|
| #              | RT [min]    | Height | Area  |
| 1              | 9.8         | 18     | 116   |
|                | Range [min] |        | Area  |
|                | 9.7 - 10.0  | 18     | 100.0 |

### Chromatograms:

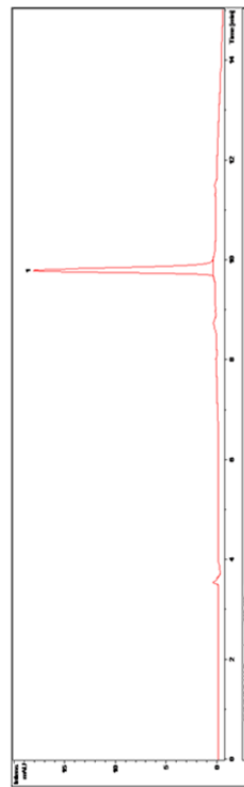

Figure S1.21. LC-ESMS analysis of reaction P3 + A1.

### The Reaction Scheme Of P3-A2

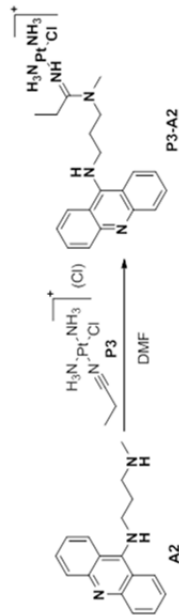

### The LC-MS Analysis Of P3-A2

### Compound Chromatogram Report - MS

Analysis Name: 05121236.D Instrument: LC-MSD-Trap-SL Print Date: 06/08/2012 05:22:32 PM  
 Method: SONG-L-1.M Operator: Administrator Acq. Date: 5/11/2012 12:47:12 AM  
 Sample Name: 3-2

#### Acquisition Parameters:

|                 |             |                       |            |                |           |
|-----------------|-------------|-----------------------|------------|----------------|-----------|
| Mass Range Mode | Std/Normal  | Trap Drive            | 52.5       | Scan Begin     | 150 m/z   |
| Ion Polarity    | Positive    | Octopole RF Amplitude | 200.0 Vpp  | Scan End       | 2200 m/z  |
| Ion Source Type | ESI         | Capillary Exit        | 135.7 Volt | Averages       | 5 Spectra |
| Dry Temp (Set)  | 350 °C      | Skimmer               | 40.0 Volt  | Max. Accu Time | 200000 µs |
| Nebulizer (Set) | 50.00 psi   | Oct 1 DC              | 12.00 Volt | ICC Target     | -1        |
| Dry Gas (Set)   | 11.00 l/min | Oct 2 DC              | 1.73 Volt  | Charge Control | on        |

#### Compound List:

| # | RT [min] | Range [min] | Height | Area | Area Frac % |
|---|----------|-------------|--------|------|-------------|
| 1 | 9.1      | 9.0 - 9.2   | 1      | 6    | 4.9         |
| 2 | 10.1     | 9.9 - 10.3  | 18     | 121  | 95.1        |

#### Chromatograms:

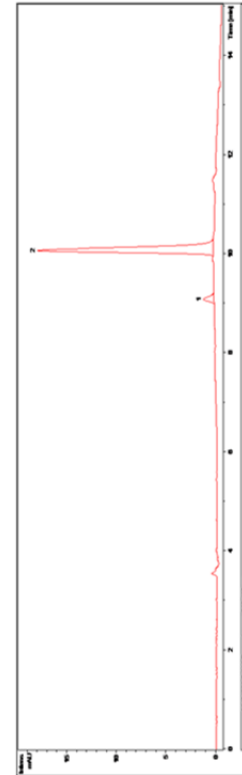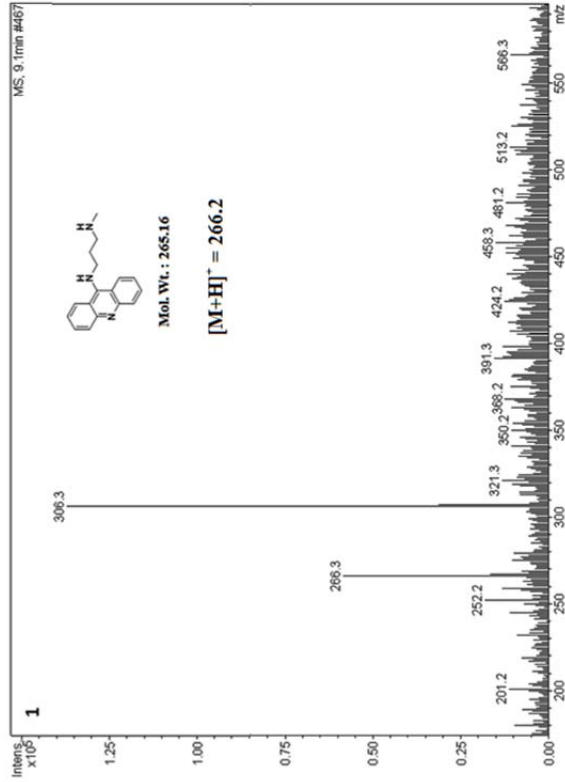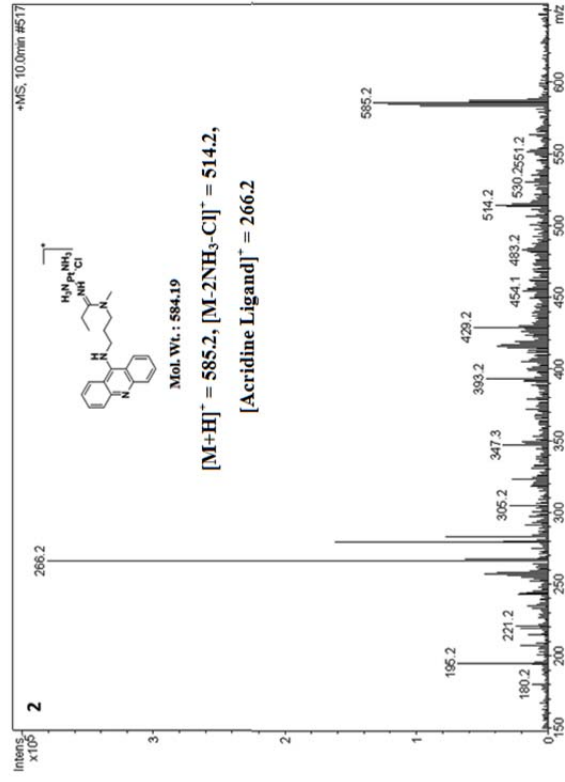

Figure S1.22. LC-ESMS analysis of reaction P3 + A2.

### The Reaction Scheme of P3-A3

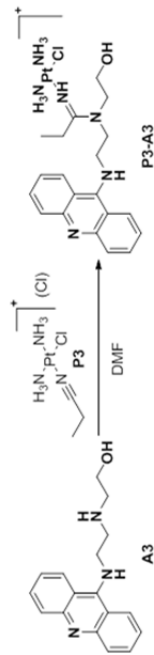

### The LC-MS Analysis of P3-A3

### Compound Chromatogram Report - MS

Analysis Name: LIB-1313.D Instrument: LC-MSD-Trap-SL Print Date: 06/08/2012 05:45:24 PM  
 Method: SONG-1-1.M Operator: Administrator Acq. Date: 5/12/2012 1:44:57 PM  
 Sample Name: 3-3

Acquisition Parameter:

|                 |             |                       |                |
|-----------------|-------------|-----------------------|----------------|
| Mass Range Mode | Std/Normal  | Trap Drive            | 150 m/z        |
| Ion Polarity    | Positive    | Scan End              | 2200 m/z       |
| Ion Source Type | ESI         | Octopole RF Amplitude | 5 Spectra      |
| Dry Temp (Set)  | 350 °C      | Capillary Exit        | Max. Accu Time |
| Nebulizer (Set) | 50.00 psi   | Skimmer               | ICC Target     |
| Dry Gas (Set)   | 11.00 l/min | Oct 1 DC              | 30000          |
|                 |             | Oct 2 DC              | on             |
|                 |             | Charge Control        |                |

#### Compound List:

| # | RT [min] | Range [min] | Height | Area | Area Frac. % |
|---|----------|-------------|--------|------|--------------|
| 1 | 8.9      | 8.7 - 9.0   | 2      | 13   | 9.9          |
| 2 | 9.8      | 9.7 - 10.0  | 17     | 120  | 90.1         |

#### Chromatograms:

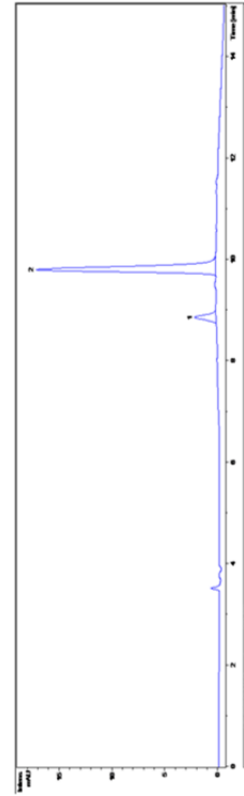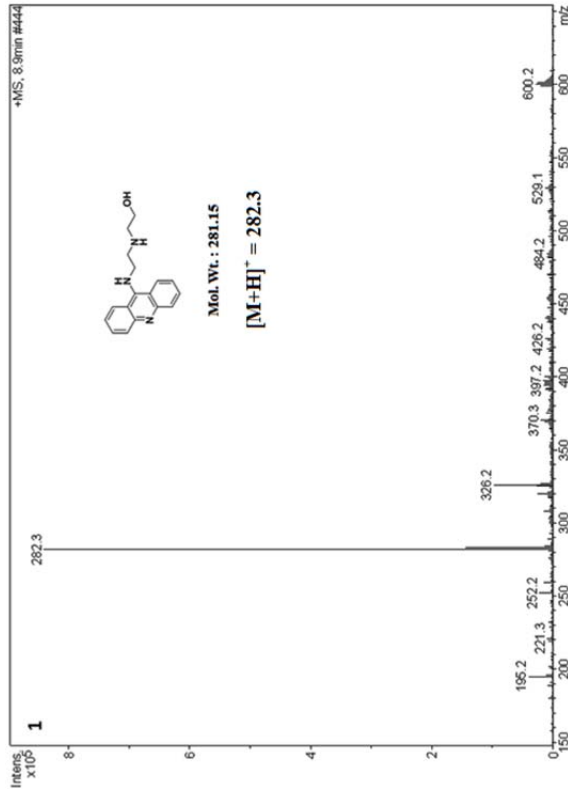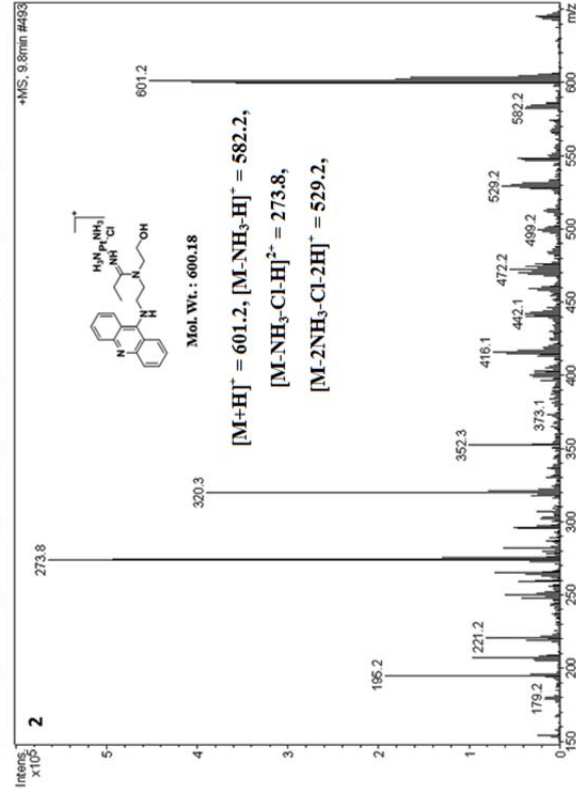

Figure S1.23. LC-ESMS analysis of reaction P3 + A3.

### The Reaction Scheme Of P3-A4

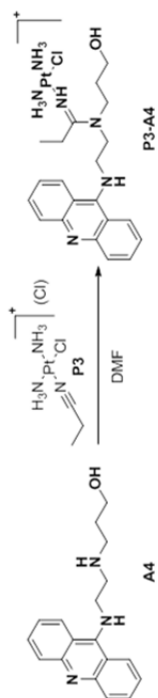

### The LC-MS Analysis Of P3-A4

### Compound Chromatogram Report - MS

**Analysis Name:** LIB-1412.D **Instrument:** LC-MSD-Trap-SL **Print Date:** 05/08/2012 05:46:36 PM  
**Method:** SONG-L-1.m **Operator:** Administrator **Acq. Date:** 5/12/2012 3:36:43 PM  
**Sample Name:** 3-4

**Analysis Info:**

| Mass Range Mode | Std/Normal  | Trap Drive            | Scan Begin     | Scan End  |
|-----------------|-------------|-----------------------|----------------|-----------|
| Positive        | 52.5        | Octopole RF Amplitude | 150 m/z        | 2200 m/z  |
| ESI             | 200.0 Vpp   | Capillary Exit        | Averages       | 5 Spectra |
| Dry Temp (Set)  | 350 °C      | Skimmer               | Max. Accu Time | 200000 µs |
| Nebulizer (Set) | 50.00 psi   | Oct 1 DC              | ICC Target     | 30000     |
| Dry Gas (Set)   | 11.00 l/min | Oct 2 DC              | Charge Control | on        |

**Compound List:**

| # | RT [min] | Range [min] | Height | Area | Area Frac % |
|---|----------|-------------|--------|------|-------------|
| 1 | 8.9      | 8.8 - 9.0   | 2      | 10   | 13.0        |
| 2 | 9.8      | 9.7 - 10.1  | 11     | 70   | 87.0        |

**Chromatograms:**

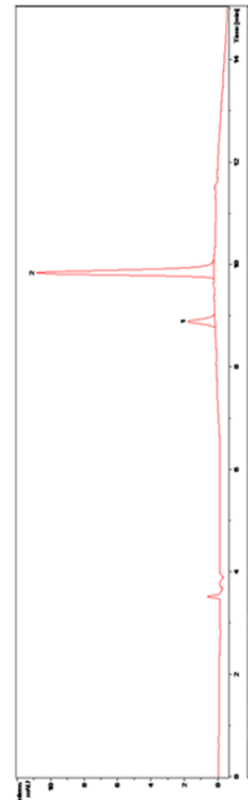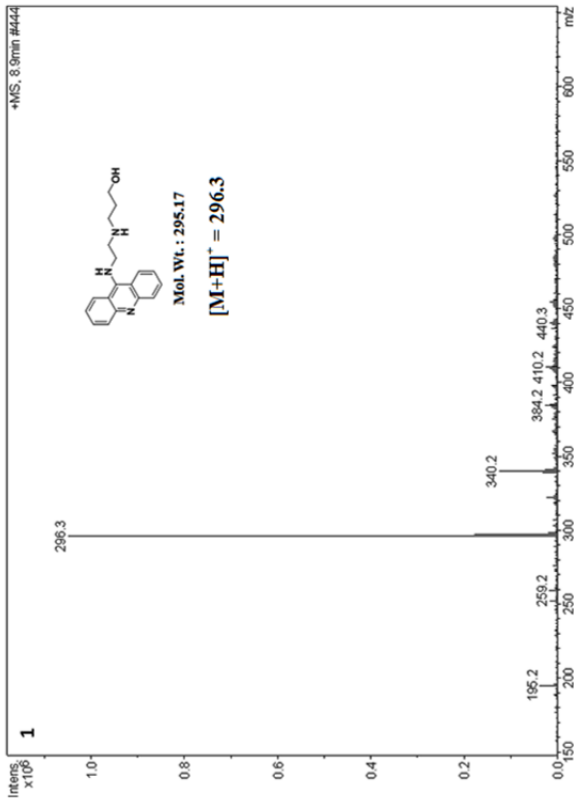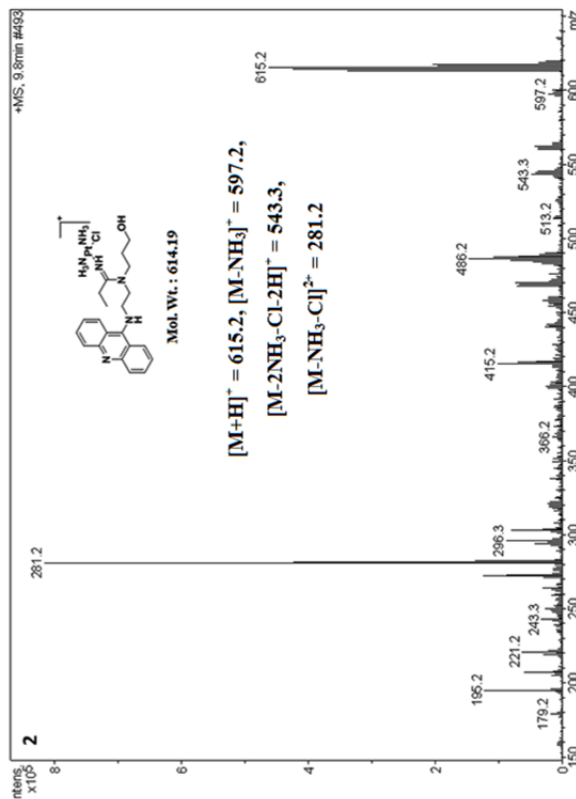

Figure S1.24. LC-ESMS analysis of reaction P3 + A4.

### The Reaction Scheme Of P3-A5

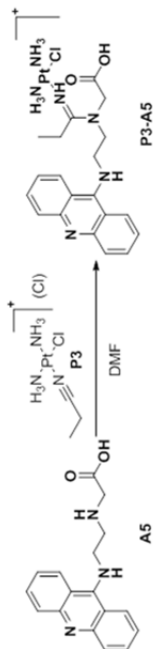

### The LC-MS Analysis Of P3-A5

### Compound Chromatogram Report - MS

**Analysis Name:** LIB12012.D **Instrument:** LC-MSD-Trap-SL **Print Date:** 06/08/2012 05:52:19 PM  
**Method:** SONG-L-1.M **Operator:** Administrator **Acq. Date:** 5/11/2012 9:45:05 PM  
**Sample Name:** 3-5-1

**Acquisition Parameter:**

|                 |             |                |           |
|-----------------|-------------|----------------|-----------|
| Mass Range Mode | Std/Normal  | Trap Drive     | 150 m/z   |
| Ion Polarity    | Positive    | Scan End       | 2200 m/z  |
| Ion Source Type | ESI         | Averages       | 5 Spectra |
| Dry Temp (Set)  | 350 °C      | Max. Accu Time | 200000 µs |
| Neblizer (Set)  | 50.00 psi   | ICC Target     | 30000     |
| Dry Gas (Set)   | 11.00 l/min | Charge Control | on        |

**Compound List:**

| # | RT [min] | Range [min] | Height | Area | Area Frac. % |
|---|----------|-------------|--------|------|--------------|
| 1 | 9.7      | 9.6 - 10.0  | 7      | 47   | 35.9         |
| 2 | 10.3     | 10.2 - 10.6 | 10     | 85   | 64.1         |

**Chromatograms:**

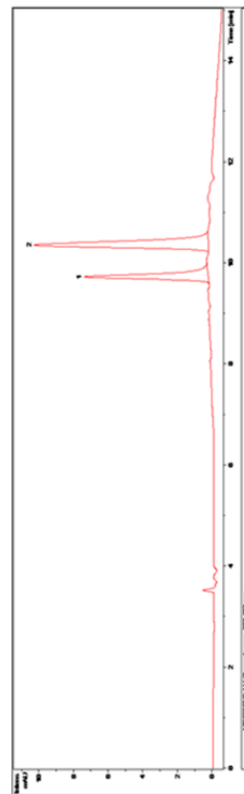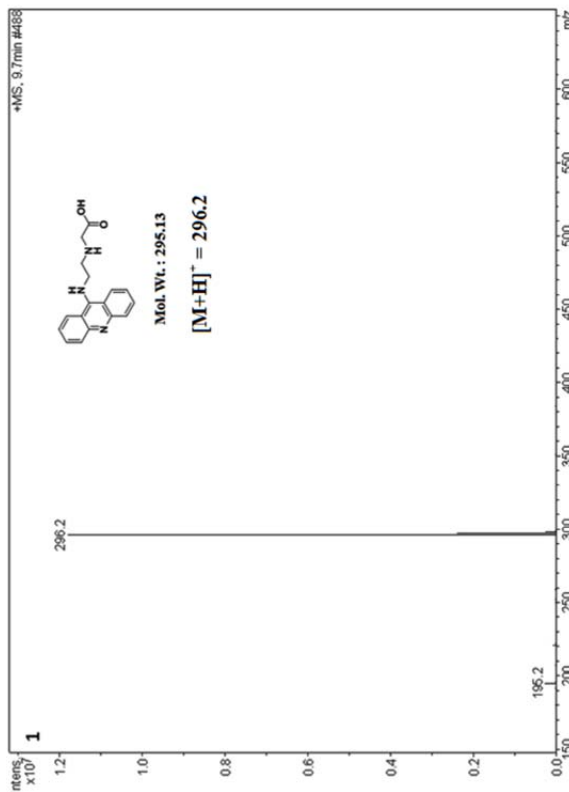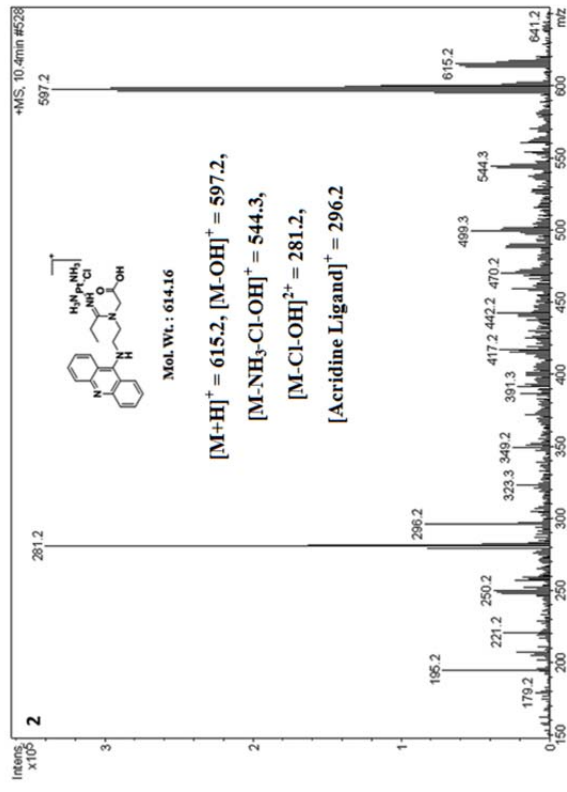

Figure S1.25. LC-ESMS analysis of reaction P3 + A5.

### The Reaction Scheme Of P3-A6

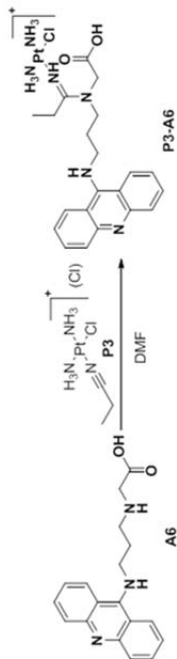

### The LC-MS Analysis Of P3-A6

#### Compound Chromatogram Report - MS

**Analysis Name:** LIB-6012.D **Instrument:** LC-MSD-Trap-SL **Print Date:** 06/08/2012 05:59:40 PM  
**Method:** SONG-L-1.M **Operator:** Administrator **Acq. Date:** 5/11/2012 11:56:12 PM  
**Sample Name:** 3-6  
**Analysis Info:**

#### Acquisition Parameter:

|                 |             |                |                |
|-----------------|-------------|----------------|----------------|
| Mass Range Mode | Std/Normal  | Trap Drive     | 150 m/z        |
| Ion Polarity    | Positive    | Scan Begin     | 2200 m/z       |
| Ion Source Type | ESI         | Capillary Exit | Averages       |
| Dry Temp (Set)  | 350 °C      | Skimmer        | 5 Spectra      |
| Nebulizer (Set) | 50.00 psi   | Oct 1 DC       | Max. Accu Time |
| Dry Gas (Set)   | 11.00 l/min | Oct 2 DC       | 30000          |
|                 |             | Charge Control | on             |

#### Compound List:

| # | RT [min] | Range [min] | Height | Area | Area Frac % |
|---|----------|-------------|--------|------|-------------|
| 1 | 10.0     | 9.9 - 10.1  | 3      | 21   | 20.0        |
| 2 | 10.6     | 10.5 - 10.9 | 11     | 82   | 80.0        |

#### Chromatograms:

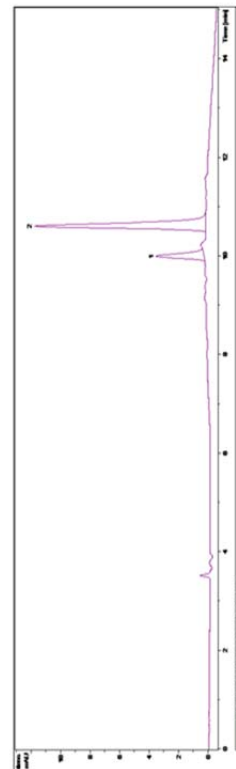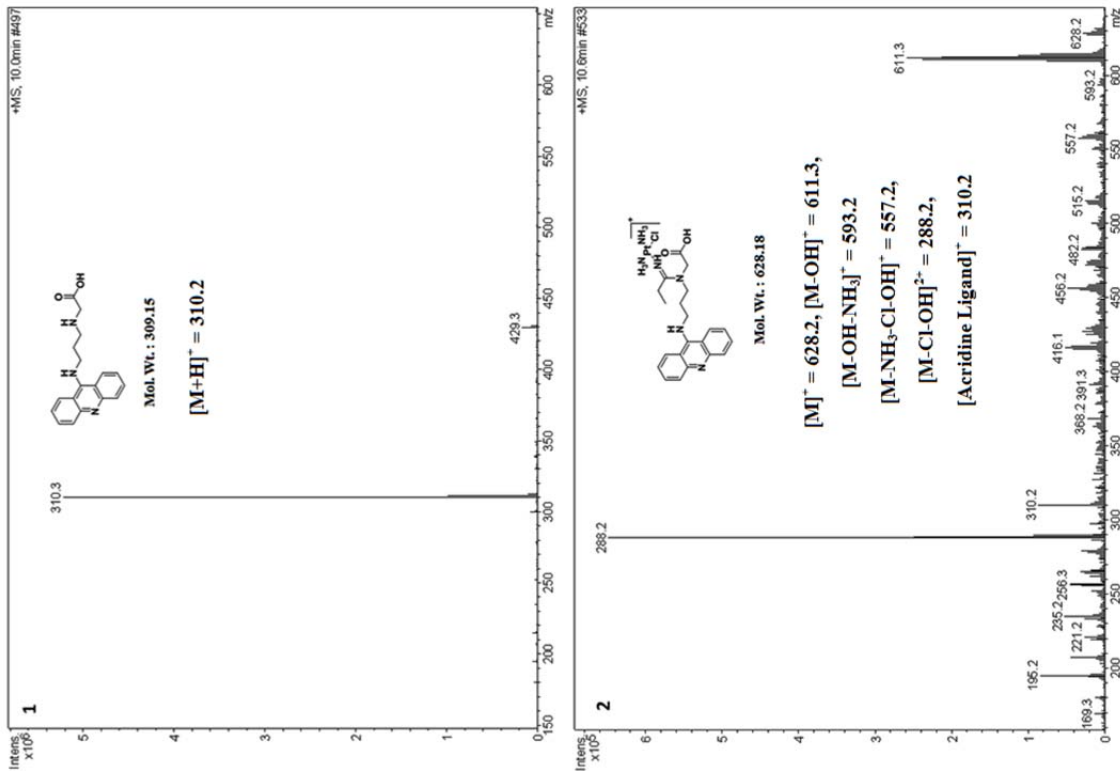

Figure S1.26. LC-ESMS analysis of reaction P3 + A6.

### The Reaction Scheme Of P3-A7

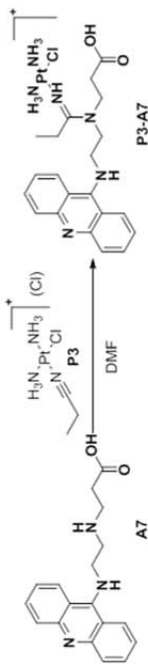

### The LC-MS Analysis Of P3-A7

### Compound Chromatogram Report - MS

**Analysis Name:** LIB-7003.D **Instrument:** LC-MSD-Trip-SL **Print Date:** 06/08/2012 06:01:20 PM  
**Method:** SONG-L-1.M **Operator:** Administrator **Acq. Date:** 5/12/2012 9:59:28 AM  
**Sample Name:** 3-7

**Acquisition Parameter:**  
 Mass Range Mode: Std/Normal **Trap Drive:** 150 m/z  
 Ion Polarity: Positive **Octopole RF Amplitude:** 52.5 **Scan Begin:** 2200 m/z  
 Ion Source Type: ESI **Capillary Exit:** 200.0 Vpp **Averages:** 5 Spectra  
 Dry Temp (Set): 350 °C **Skimmer:** 135.7 Volt **Max. Accu Time:** 200000 µs  
 Nebulizer (Set): 50.00 psi **Oct 1 DC:** 12.00 Volt **ICC Target:** 30000  
 Dry Gas (Set): 11.00 /min **Oct 2 DC:** 1.73 Volt **Charge Control:** on

| Compound List: |          |             |      |              |
|----------------|----------|-------------|------|--------------|
| #              | RT [min] | Range [min] | Area | Area Frac. % |
| 1              | 9.2      | 9.1 - 9.5   | 20   | 45.9         |
| 2              | 10.0     | 9.9 - 10.2  | 24   | 54.1         |

### Chromatograms:

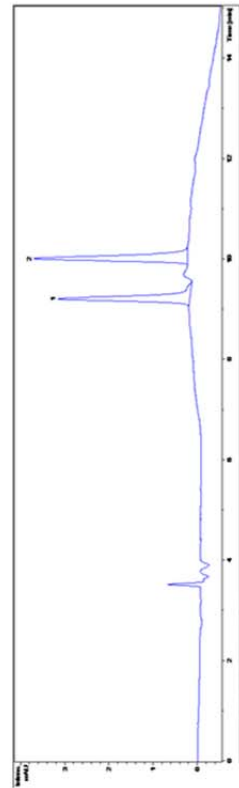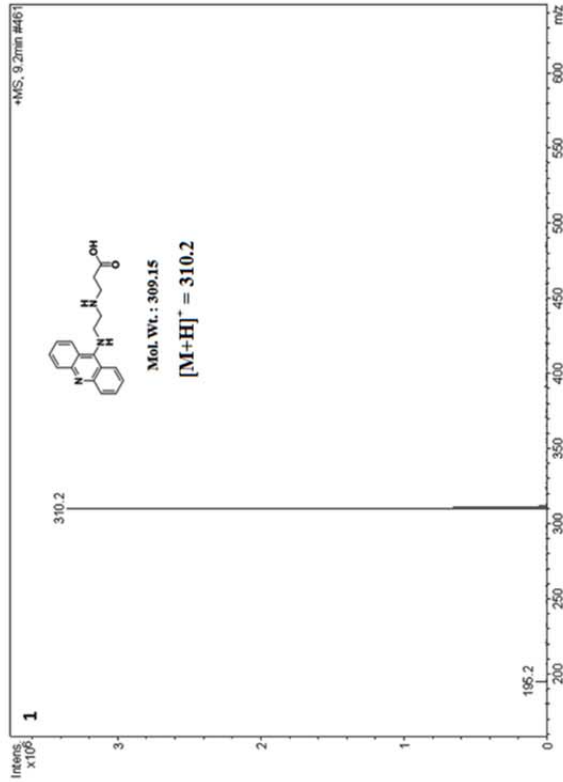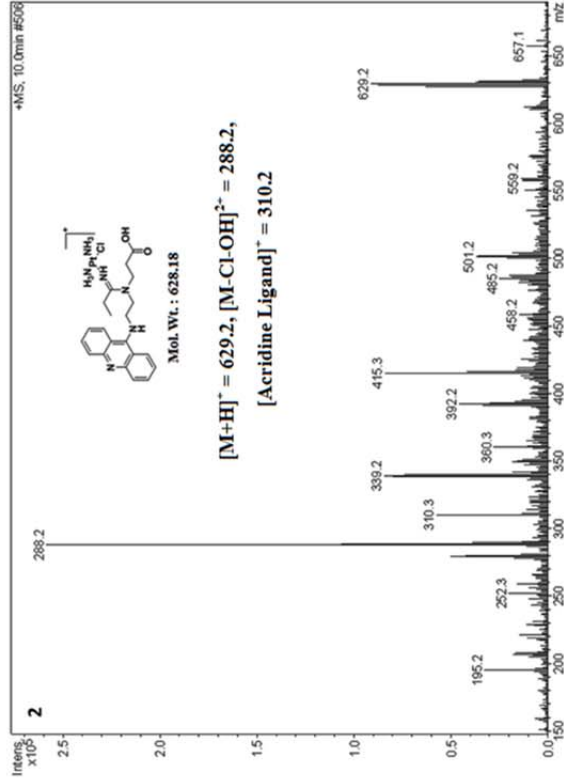

Figure S1.27. LC-ESMS analysis of reaction P3 + A7.

### The Reaction Scheme Of P3-A8

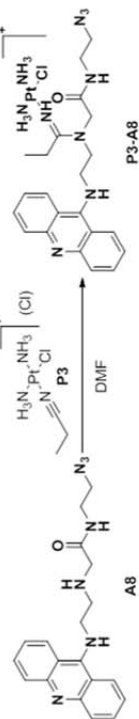

### The LC-MS Analysis Of P3-A8

### Compound Chromatogram Report - MS

**Analysis Name:** LIB-1821.D **Instrument:** LC-MSD-Trap-SL **Print Date:** 06/08/2012 06:03:06 PM  
**Method:** SONG-L-1.M **Operator:** Administrator **Acq. Date:** 5/12/2012 10:56:37 PM  
**Sample Name:** 3-8  
**Analysis Info:**

**Acquisition Parameter:**  
 Mass Range Mode: Std/Normal **Trap Drive:** 150 m/z  
 Ion Polarity: Positive **Octopole RF Amplitude:** 2200 m/z  
 Ion Source Type: ESI **Capillary Exit:** 5 Spectra  
 Dry Temp (Set): 350 °C **Skimmer:** 135.7 Volt  
 Nebulizer (Set): 50.00 psi **Oct 1 DC:** 40.0 Volt  
 Dry Gas (Set): 11.00 l/min **Oct 2 DC:** 12.00 Volt  
**Charge Control:** on

**Compound List:**

| # | RT [min] | Range [min] | Height | Area | Area Frac % |
|---|----------|-------------|--------|------|-------------|
| 1 | 9.7      | 9.5 - 9.8   | 7      | 44   | 58.8        |
| 2 | 10.7     | 10.4 - 11.0 | 4      | 31   | 41.2        |

**Chromatograms:**

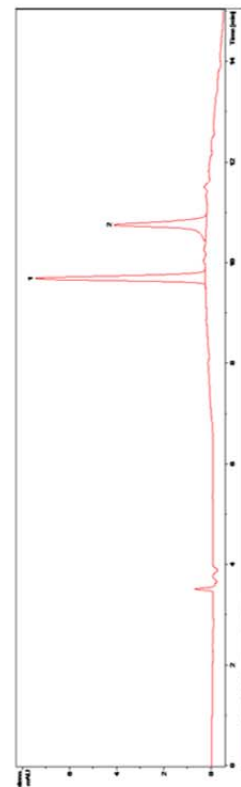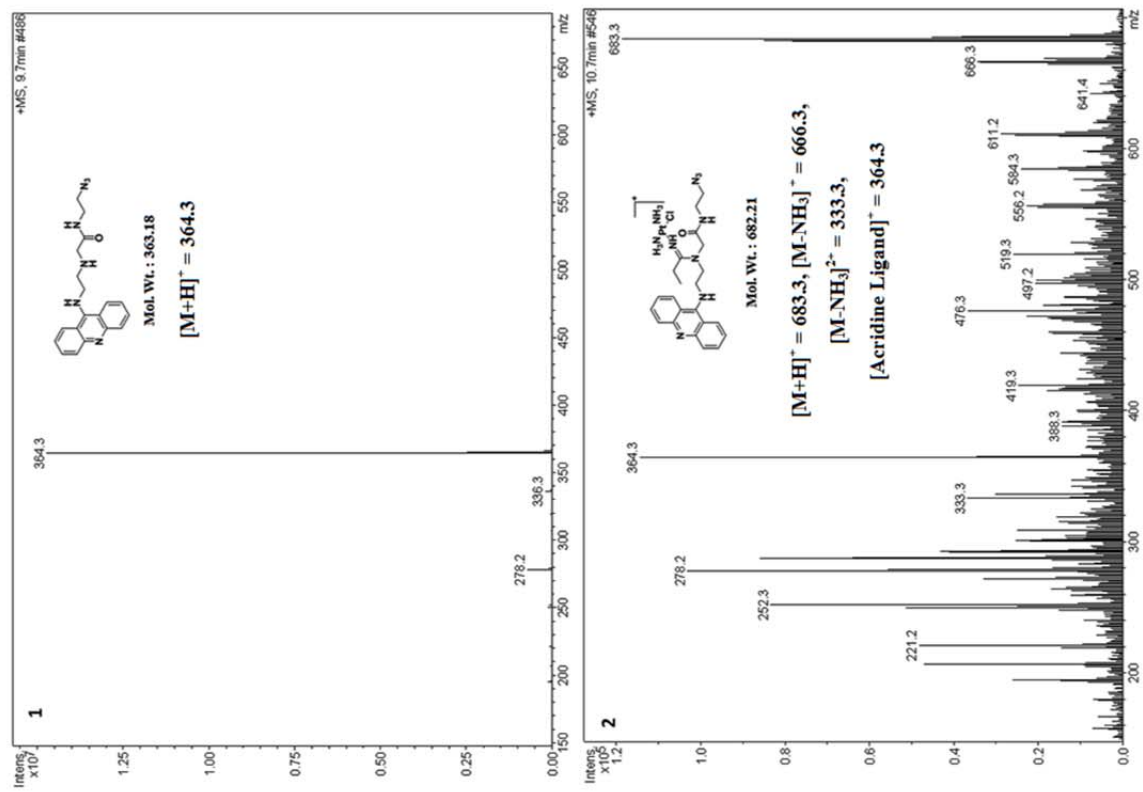

Figure S1.28. LC-ESMS analysis of reaction P3 + A8.



The Reaction Scheme Of P3-A9

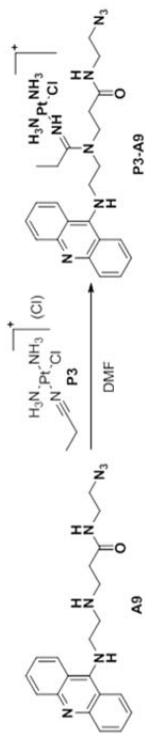

The LC-MS Analysis Of P3-A9

Compound Chromatogram Report - MS

Analysis Name: LIB91021.D Instrument: LC-HSD-Trap-SL Print Date: 06/08/2012 06:05:40 PM  
 Method: SONG-L-1.M Operator: Administrator Acq. Date: 5/13/2012 1:30:49 PM  
 Sample Name: 3-9  
 Analysis Info:

Acquisition Parameter:

|                 |             |                       |            |                |           |
|-----------------|-------------|-----------------------|------------|----------------|-----------|
| Mass Range Mode | Std/Normal  | Trap Drive            | 52.5       | Scan Begin     | 150 m/z   |
| Ion Polarity    | Positive    | Octopole RF Amplitude | 200.0 Vpp  | Scan End       | 2200 m/z  |
| ESI             | ESI         | Capillary Exit        | 135.7 Volt | Averages       | 5 Spectra |
| Ion Source Type | Skimmer     | Skimmer               | 40.0 Volt  | Max. Accu Time | 200000 µs |
| Dry Temp (Set)  | 350 °C      | Oct 1 DC              | 12.00 Volt | ICC Target     | 30000     |
| Nebulizer (Set) | 50.00 psi   | Oct 2 DC              | 1.73 Volt  | Charge Control | on        |
| Dry Gas (Set)   | 11.00 l/min |                       |            |                |           |

Compound List:

| # | RT [min] | Range [min] | Height | Area | Area Frac % |
|---|----------|-------------|--------|------|-------------|
| 1 | 9.5      | 9.4 - 9.7   | 6      | 37   | 31.8        |
| 2 | 10.3     | 10.2 - 10.6 | 11     | 78   | 68.2        |

Chromatograms:

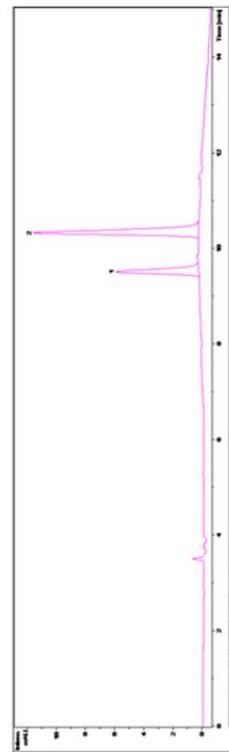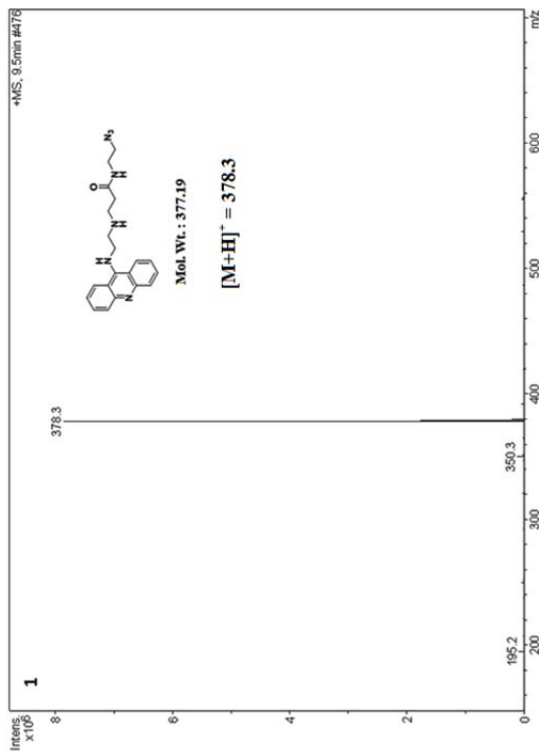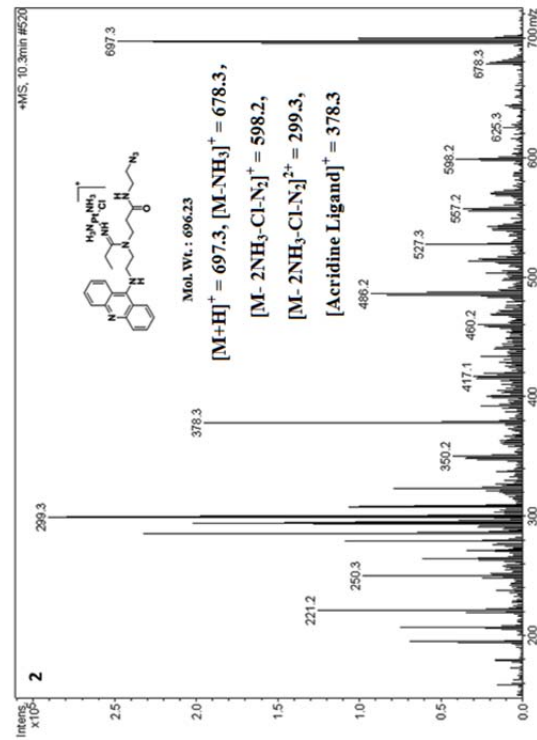

Figure S1.29. LC-ESMS analysis of reaction P3 + A9.

### The Reaction Scheme Of P3-A10

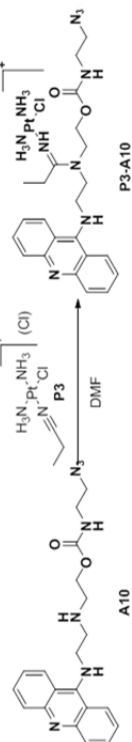

### The LC-MS Analysis Of P3-A10

#### Compound Chromatogram Report - MS

**Analysis Name:** LIB91027.D **Instrument:** LC-MSD-Trip-SL **Print Date:** 06/08/2012 06:06:46 PM  
**Method:** SONG-L-1.M **Operator:** Administrator **Acq. Date:** 5/13/2012 3:43:20 PM  
**Sample Name:** 3-10

#### Analysis Info:

#### Acquisition Parameter:

|                 |             |                       |            |                |           |
|-----------------|-------------|-----------------------|------------|----------------|-----------|
| Mass Range Mode | Std/Normal  | Trap Drive            | 52.5       | Scan Begin     | 150 m/z   |
| Ion Polarity    | Positive    | Octopole RF Amplitude | 200.0 Vpp  | Scan End       | 2200 m/z  |
| Ion Source Type | ESI         | Capillary Exit        | 135.7 Volt | Averages       | 5 Spectra |
| Dry Temp (Set)  | 350 °C      | Skimmer               | 40.0 Volt  | Max. Accu Time | 200000 µs |
| Nebulizer (Set) | 50.00 psi   | Oct 1 DC              | 12.00 Volt | ICC Target     | 30000     |
| Dry Gas (Set)   | 11.00 l/min | Oct 2 DC              | 1.73 Volt  | Charge Control | on        |

#### Compound List:

| # | RT [min] | Range [min] | Height | Area | Area Frac % |
|---|----------|-------------|--------|------|-------------|
| 1 | 9.6      | 9.4 - 9.7   | 5      | 35   | 45.3        |
| 2 | 10.4     | 10.2 - 10.6 | 6      | 42   | 54.7        |

#### Chromatograms:

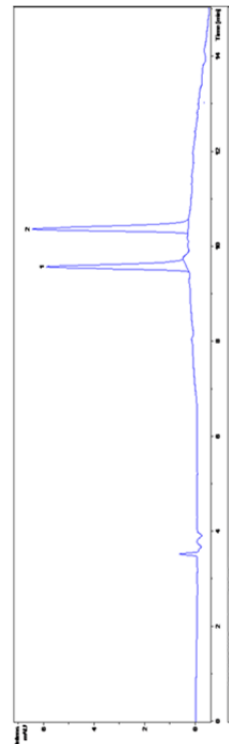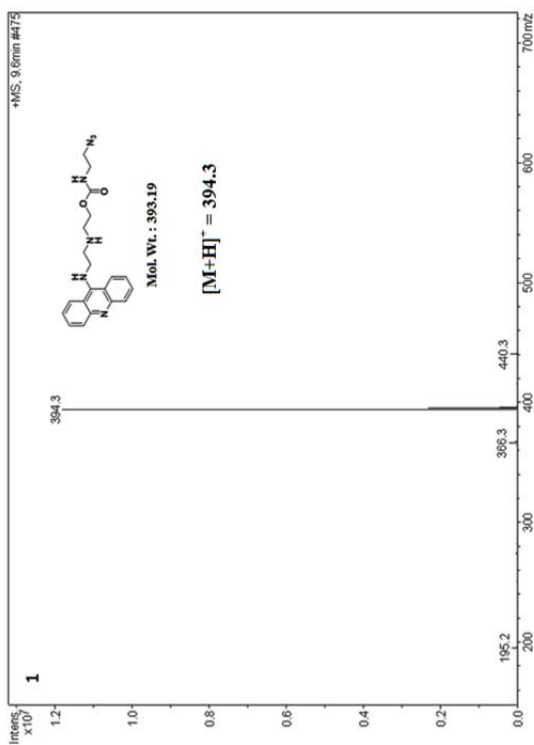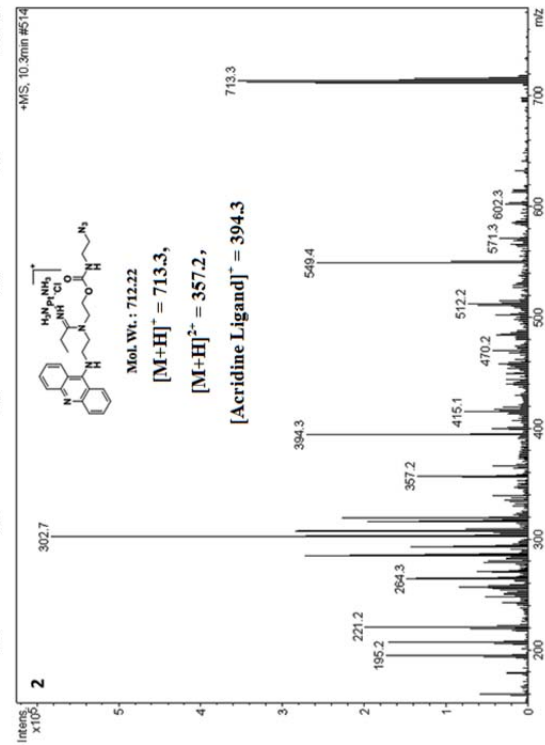

Figure S1.30. LC-ESMS analysis of reaction P3 + A10.

### The Reaction Scheme Of P4-A1

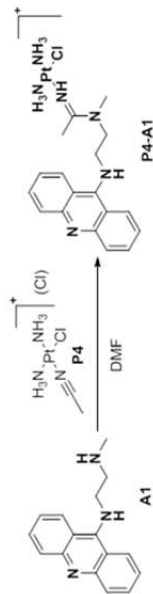

### The LC-MS Analysis Of P4-A1

#### Compound Chromatogram Report - MS

**Analysis Name:** 05121213.D **Instrument:** LC-MSD-Trip-SL **Print Date:** 06/08/2012 06:08:25 PM  
**Method:** SONG-L-1.M **Operator:** Administrator **Acq. Date:** 5/10/2012 7:38:31 PM  
**Sample Name:** 4-1  
**Analysis Info:**

#### Acquisition Parameter:

|                 |             |                       |            |                |           |
|-----------------|-------------|-----------------------|------------|----------------|-----------|
| Mass Range Mode | Std/Normal  | Trap Drive            | 52.5       | Scan Begin     | 150 m/z   |
| Ion Polarity    | Positive    | Octopole RF Amplitude | 200.0 Vpp  | Scan End       | 2200 m/z  |
| Ion Source Type | ESI         | Capillary Exit        | 135.7 Volt | Averages       | 5 Spectra |
| Dry Temp (Set)  | 350 °C      | Skimmer               | 40.0 Volt  | Max. Accu Time | 200000 µs |
| Nebulizer (Set) | 50.00 psi   | Oct 1 DC              | 12.00 Volt | ICC Target     | 30000     |
| Dry Gas (Set)   | 11.00 l/min | Oct 2 DC              | 1.73 Volt  | Charge Control | on        |

#### Compound List:

| # | RT [min] | Range [min] | Height | Area | Area Frac % |
|---|----------|-------------|--------|------|-------------|
| 1 | 9.5      | 9.4 - 9.7   | 18     | 116  | 100.0       |

#### Chromatograms:

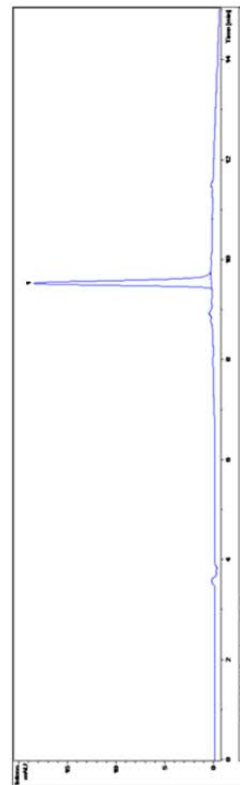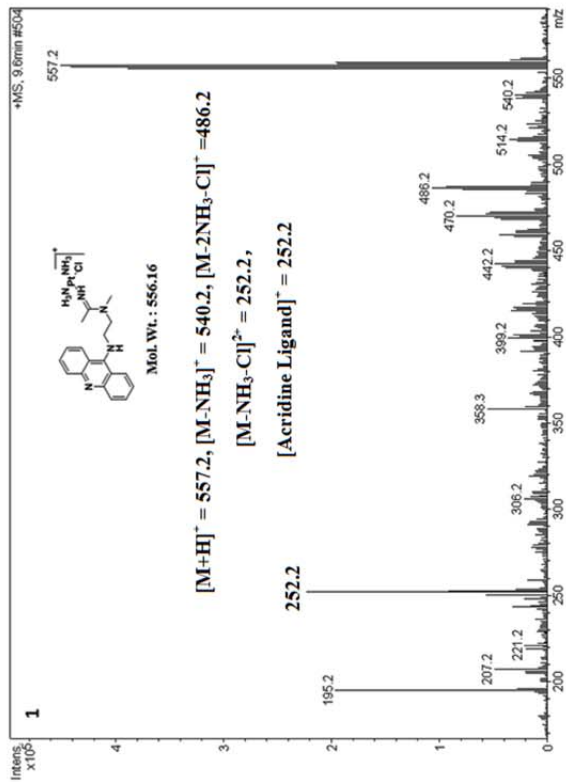

Figure S1.31. LC-ESMS analysis of reaction P4 + A1.

### The Reaction Scheme Of P4-A2

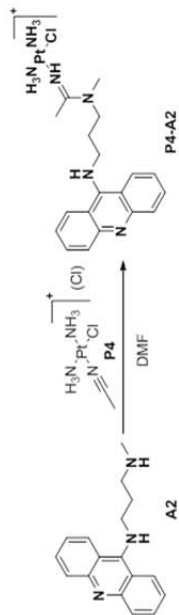

### The LC-MS Analysis Of P4-A2

#### Compound Chromatogram Report - MS

**Analysis Name:** 05121237.D **Instrument:** LC-MSD-Trap-SL **Print Date:** 06/08/2012 06:09:21 PM  
**Method:** SONG-L-1.M **Operator:** Administrator **Acq. Date:** 5/11/2012 1:10:34 AM  
**Sample Name:** 4-2  
**Analysis Info:**

#### Acquisition Parameter:

|                 |             |                       |            |
|-----------------|-------------|-----------------------|------------|
| Mass Range Mode | Std/Normal  | Trap Drive            | 150 m/z    |
| Ion Polarity    | Positive    | Octopole RF Amplitude | 200.0 Vpp  |
| Ion Source Type | ESI         | Capillary Exit        | 5 Spectra  |
| Dry Temp (Set)  | 350 °C      | Skimmer               | 200000 µs  |
| Nebulizer (Set) | 50.00 psi   | Oct 1 DC              | 12.00 Volt |
| Dry Gas (Set)   | 11.00 l/min | Oct 2 DC              | 1.73 Volt  |
|                 |             | Charge Control        | on         |

#### Compound List:

| # | RT [min] | Range [min] | Height | Area | Area Frac % |
|---|----------|-------------|--------|------|-------------|
| 1 | 9.8      | 9.6 - 10.0  | 17     | 116  | 100.0       |

#### Chromatograms:

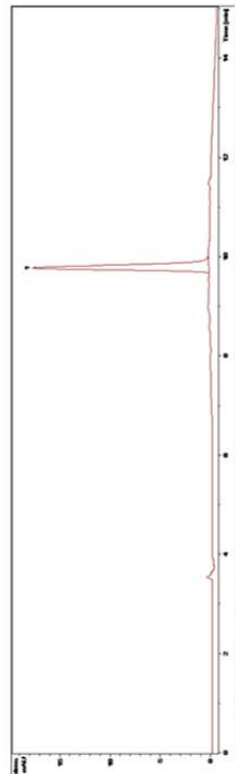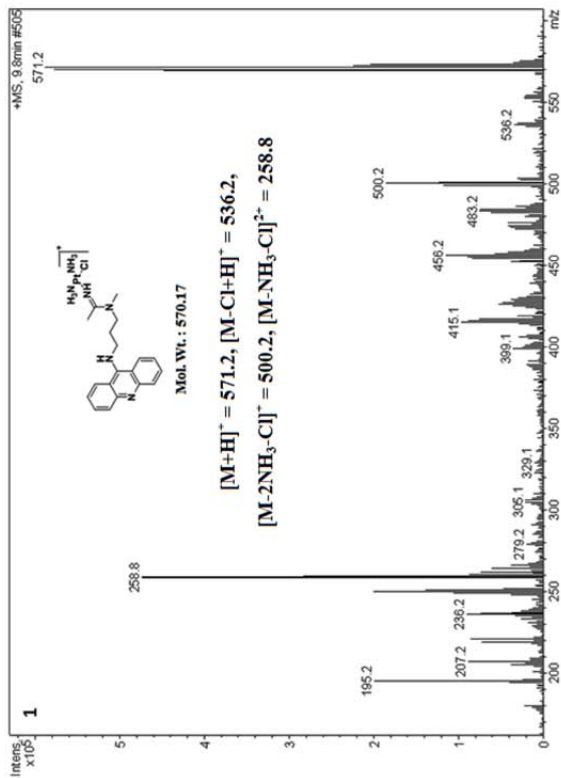

Figure S1.32. LC-ESMS analysis of reaction P4 + A2.

### The Reaction Scheme Of P4-A3

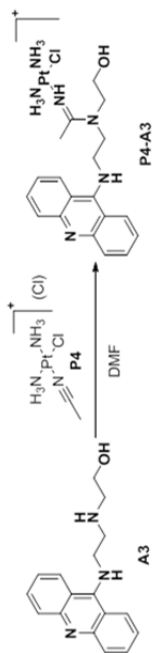

### The LC-MS Analysis Of P4-A3

#### Compound Chromatogram Report - MS

**Analysis Name:** 05121243.D **Instrument:** LC-MSD-Trip-SL **Print Date:** 06/08/2012 06:11:30 PM  
**Method:** SONG-L-1.M **Operator:** Administrator **Acq. Date:** 5/11/2012 3:31:45 AM  
**Sample Name:** 4-3

#### Acquisition Parameters:

|                 |             |                       |                |
|-----------------|-------------|-----------------------|----------------|
| Mass Range Mode | Std/Normal  | Trap Drive            | 150 m/z        |
| Ion Polarity    | Positive    | Octopole RF Amplitude | 2200 m/z       |
| Ion Source Type | ESI         | Capillary Exit        | Averages       |
| Dry Temp (Set)  | 350 °C      | Skimmer               | 5 Spectra      |
| Nebulizer (Set) | 50.00 psi   | Oct 1 DC              | Max. Accu Time |
| Dry Gas (Set)   | 11.00 l/min | Oct 2 DC              | ICC Target     |
|                 |             |                       | Charge Control |
|                 |             |                       | on             |

#### Compound List:

| # | RT [min] | Range [min] | Height | Area | Area Frac % |
|---|----------|-------------|--------|------|-------------|
| 1 | 9.5      | 9.4 - 9.8   | 15     | 105  | 100.0       |

#### Chromatograms:

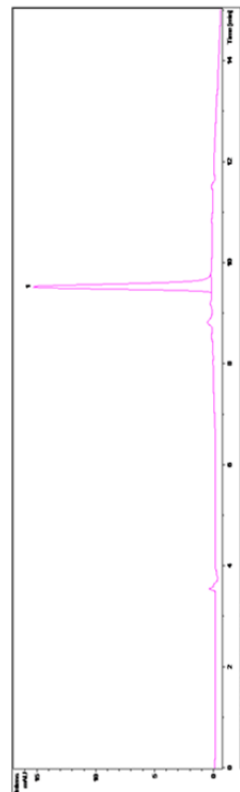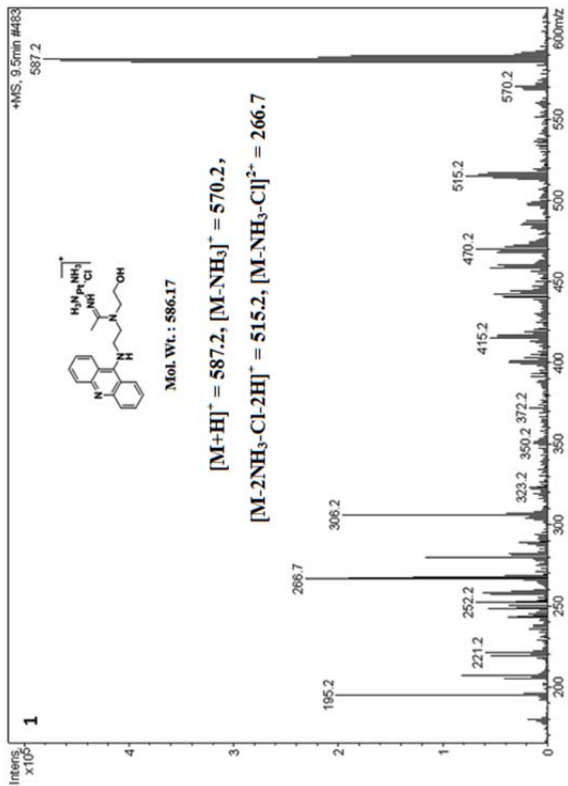

Figure S1.33. LC-ESMS analysis of reaction P4 + A3.

### The Reaction Scheme Of P4-A4

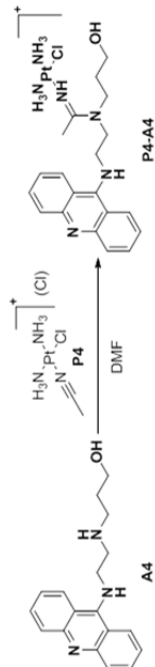

### The LC-MS Analysis Of P4-A4

#### Compound Chromatogram Report - MS

Analysis Name: 05121249.D Instrument: LC-MSD-Trap-SL Print Date: 06/08/2012 06:14:21 PM  
 Method: SONG-L-1.M Operator: Administrator Acq. Date: 5/11/2012 5:53:07 AM  
 Sample Name: 4-4  
 Analysis Info:

#### Acquisition Parameter:

|                 |             |                       |            |
|-----------------|-------------|-----------------------|------------|
| Mass Range Mode | Std/Normal  | Trap Drive            | 150 m/z    |
| Ion Polarity    | Positive    | Octopole RF Amplitude | 200.0 Vpp  |
| Ion Source Type | ESI         | Capillary Exit        | 135.7 Volt |
| Dry Temp (Set)  | 350 °C      | Skimmer               | 40.0 Volt  |
| Nebulizer (Set) | 50.00 psi   | Oct 1 DC              | 12.00 Volt |
| Dry Gas (Set)   | 11.00 l/min | Oct 2 DC              | 1.73 Volt  |
|                 |             | Charge Control        | on         |

#### Compound List:

| # | RT [min] | Range [min] | Height | Area | Area Frac % |
|---|----------|-------------|--------|------|-------------|
| 1 | 9.5      | 9.4 - 9.8   | 16     | 105  | 100.0       |

#### Chromatograms:

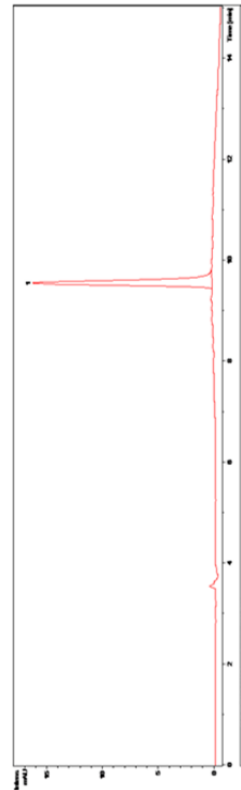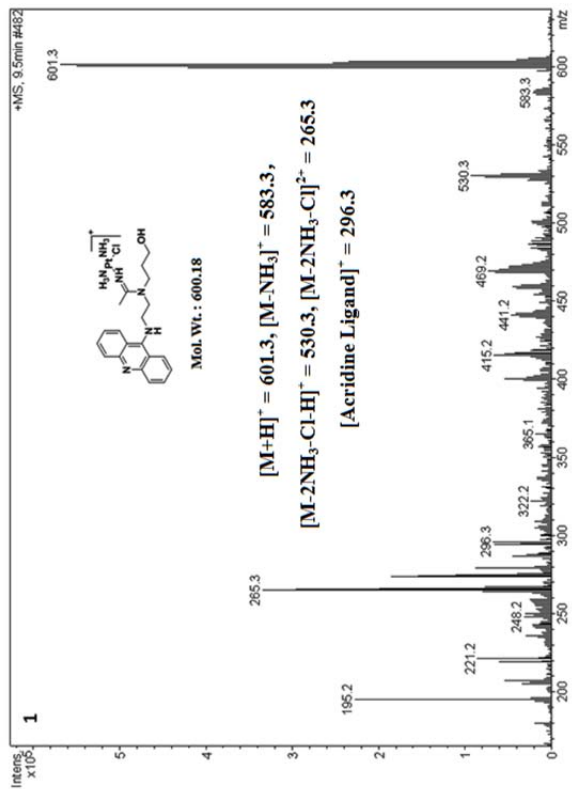

Figure S1.34. LC-ESMS analysis of reaction P4 + A4.

### The Reaction Scheme Of P4-A5

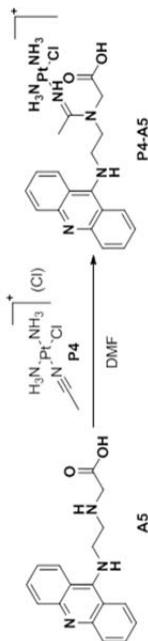

### The LC-MS Analysis Of P4-A5

### Compound Chromatogram Report - MS

**Analysis Name:** LIB12013.D **Instrument:** LC-MSD-Trip-SL **Print Date:** 06/08/2012 06:16:06 PM  
**Method:** SONG-L-1.M **Operator:** Administrator **Acq. Date:** 5/11/2012 10:07:11 PM  
**Sample Name:** 4-5-1

#### Acquisition Parameters:

|                 |             |                       |            |                |           |
|-----------------|-------------|-----------------------|------------|----------------|-----------|
| Mass Range Mode | Std/Normal  | Trap Drive            | 52.5       | Scan Begin     | 150 m/z   |
| Ion Polarity    | Positive    | Octopole RF Amplitude | 200.0 Vpp  | Scan End       | 2200 m/z  |
| Ion Source Type | ESI         | Capillary Exit        | 135.7 Volt | Averages       | 5 Spectra |
| Dry Temp (Set)  | 350 °C      | Skimmer               | 40.0 Volt  | Max. Accu Time | 200000 µs |
| Nebulizer (Set) | 50.00 psi   | Oct 1 DC              | 12.00 Volt | ICC Target     | 30000     |
| Dry Gas (Set)   | 11.00 l/min | Oct 2 DC              | 1.73 Volt  | Charge Control | on        |

#### Compound List:

| # | RT [min] | Range [min] | Height | Area | Area Frac % |
|---|----------|-------------|--------|------|-------------|
| 1 | 9.7      | 9.5 - 9.9   | 6      | 36   | 28.9        |
| 2 | 10.0     | 9.9 - 10.3  | 12     | 87   | 71.1        |

#### Chromatograms:

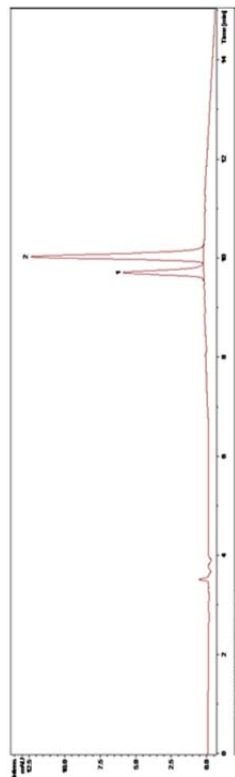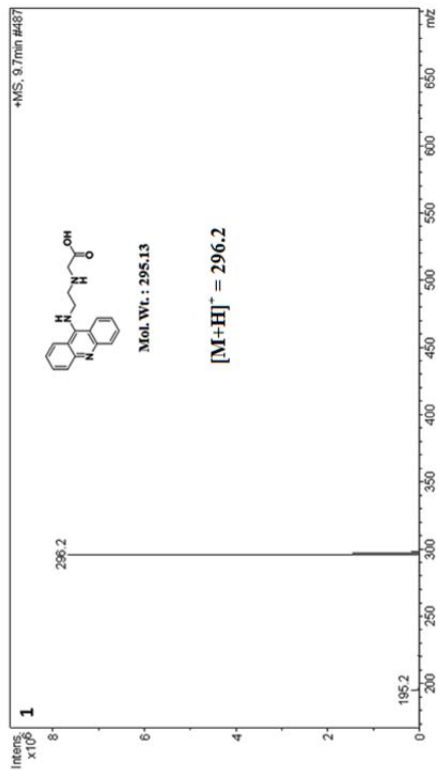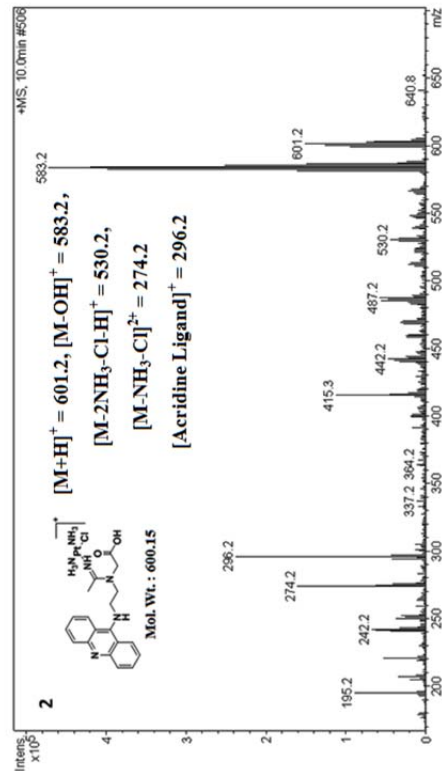

Figure S1.35. LC-ESMS analysis of reaction P4 + A5.

### The Reaction Scheme Of P4-A6

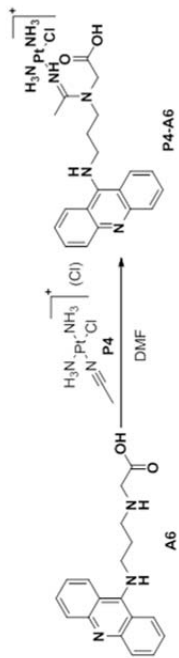

### The LC-MS Analysis Of P4-A6

### Compound Chromatogram Report - MS

**Analysis Name:** LIB-6013.D **Instrument:** LC-MSD-Trip-SL **Print Date:** 06/08/2012 06:17:13 PM  
**Method:** SONG-L-1.M **Operator:** Administrator **Acq. Date:** 5/12/2012 12:18:10 AM  
**Sample Name:** 4-6

#### Acquisition Parameters:

|                 |             |                       |                           |
|-----------------|-------------|-----------------------|---------------------------|
| Mass Range Mode | Std/Normal  | Trap Drive            | 150 m/z                   |
| Ion Polarity    | Positive    | Octopole RF Amplitude | 2200 Vpp                  |
| Ion Source Type | ESI         | Capillary Exit        | 5 Spectra                 |
| Dry Temp (Set)  | 350 °C      | Skimmer               | Plax. Accu Time 200000 us |
| Nebulizer (Set) | 50.00 psi   | Oct 1 DC              | 30000                     |
| Dry Gas (Set)   | 11.00 l/min | Oct 2 DC              | Charge Control on         |

#### Compound List:

| # | RT [min] | Range [min] | Height | Area | Area Frac % |
|---|----------|-------------|--------|------|-------------|
| 1 | 10.0     | 9.8 - 10.1  | 3      | 19   | 18.5        |
| 2 | 10.3     | 10.1 - 10.5 | 13     | 85   | 81.5        |

#### Chromatograms:

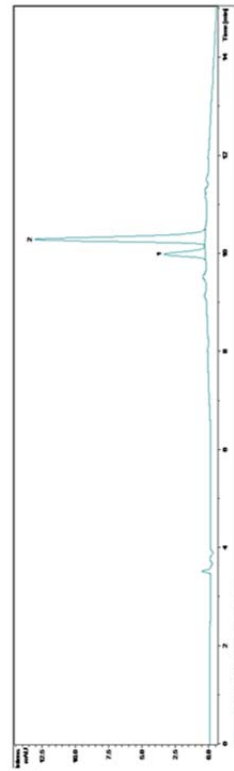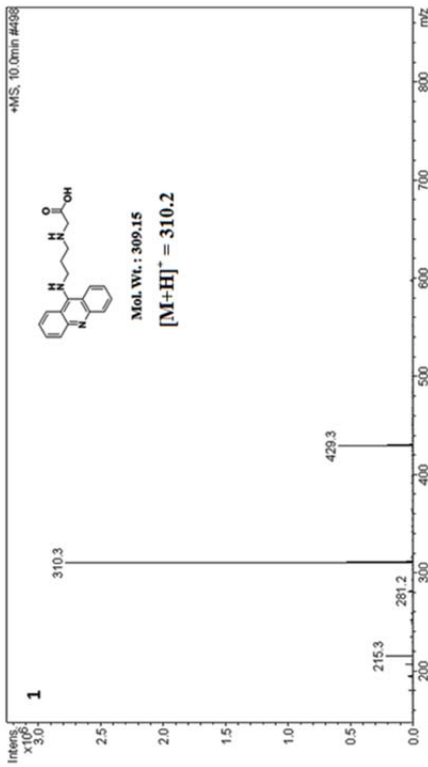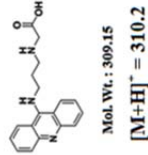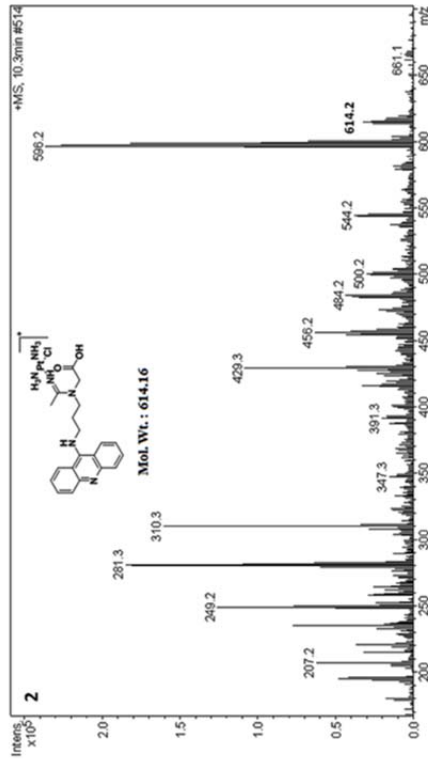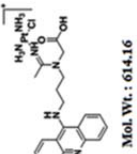

**[M]<sup>+</sup> = 614.2, [M-NH<sub>3</sub>-H]<sup>+</sup> = 596.2, [M-2NH<sub>3</sub>-Cl-H]<sup>+</sup> = 544.2,**  
**[M-2NH<sub>3</sub>-Cl-CO<sub>2</sub>-H]<sup>+</sup> = 500.2, [M-2NH<sub>3</sub>-Cl-CO<sub>2</sub>-H]<sup>2+</sup> = 249.2**  
**[M-NH<sub>3</sub>-Cl]<sup>2+</sup> = 281.3, [Acridine Ligand]<sup>+</sup> = 310.2**

Figure S1.36. LC-ESMS analysis of reaction P4 + A6.



### The Reaction Scheme of P4-A7

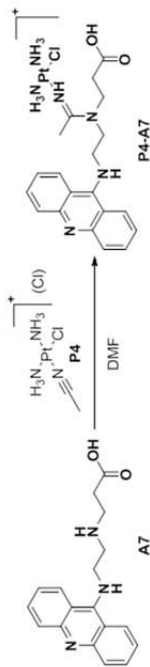

### The LC-MS Analysis of P4-A7

### Compound Chromatogram Report - MS

Analysis Name: LIB-7010.D Instrument: LC-MSD-Trip-SL Print Date: 06/08/2012 06:19:04 PM  
 Method: SONG-L-1.M Operator: Administrator Acq. Date: 5/12/2012 11:27:15 AM  
 Sample Name: 4-7

Acquisition Parameter:

|                 |             |                       |           |
|-----------------|-------------|-----------------------|-----------|
| Mass Range Mode | Std/Normal  | Trap Drive            | 150 m/z   |
| Ion Polarity    | Positive    | Octopole RF Amplitude | 2200 Vpp  |
| Ion Source Type | ESI         | Capillary Exit        | 5 Spectra |
| Dry Temp (Set)  | 350 °C      | Skimmer               | 200000 µs |
| Nebulizer (Set) | 50.00 psi   | Oct 1 DC              | -1        |
| Dry Gas (Set)   | 11.00 l/min | Oct 2 DC              | on        |

Compound List:

| # | RT [min] | Range [min] | Height | Area | Area Frac % |
|---|----------|-------------|--------|------|-------------|
| 1 | 9.2      | 9.0 - 9.3   | 4      | 27   | 8.0         |
| 2 | 9.7      | 9.6 - 10.0  | 48     | 309  | 92.0        |

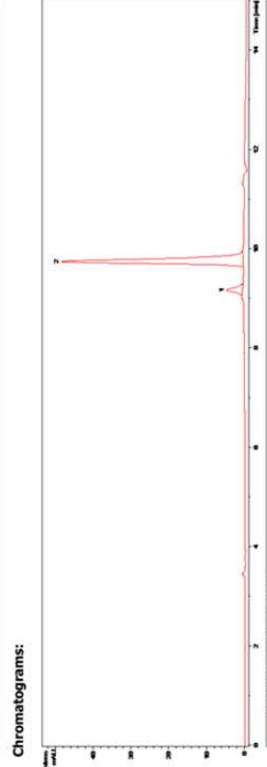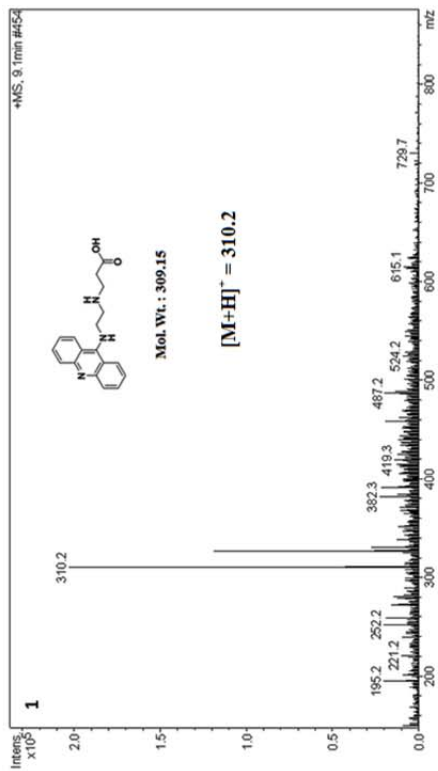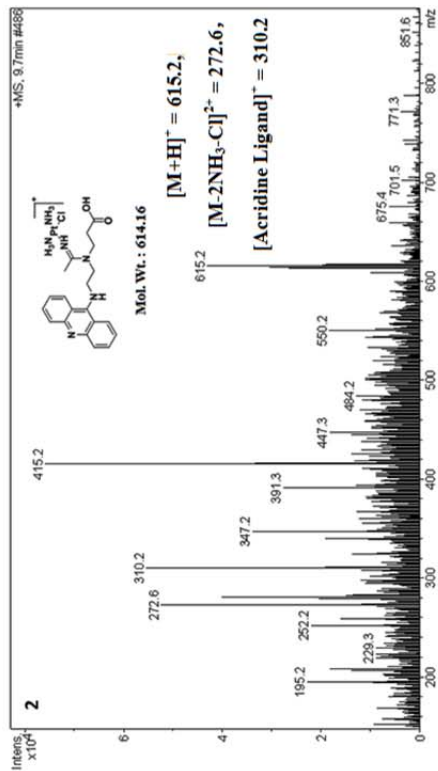

Figure S1.37. LC-ESMS analysis of reaction P4 + A7.

### The Reaction Scheme Of P4-A8

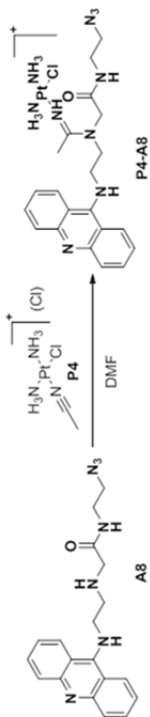

### The LC-MS Analysis Of P4-A8

### Compound Chromatogram Report - MS

**Analysis Name:** LIB-1822.D **Instrument:** LC-MSD-Trip-SL **Print Date:** 06/08/2012 06:20:06 PM  
**Method:** SONG-L-1.M **Operator:** Administrator **Acq. Date:** 5/12/2012 11:18:32 PM  
**Sample Name:** 4-8  
**Analysis Info:**

#### Acquisition Parameter:

|                 |             |                       |                   |
|-----------------|-------------|-----------------------|-------------------|
| Mass Range Mode | Std/Normal  | Trap Drive            | 150 m/z           |
| Ion Polarity    | Positive    | Octopole RF Amplitude | 2200 m/z          |
| Ion Source Type | ESI         | Capillary Exit        | 5 Spectra         |
| Dry Temp (Set)  | 350 °C      | Skimmer               | 200000 µs         |
| Neblizer (Set)  | 50.00 psi   | Oct 1 DC              | 12.00 Volt        |
| Dry Gas (Set)   | 11.00 l/min | Oct 2 DC              | Charge Control on |

#### Compound List:

| # | RT [min] | Range [min] | Height | Area | Area Frac % |
|---|----------|-------------|--------|------|-------------|
| 1 | 9.7      | 9.6 - 9.8   | 4      | 27   | 32.4        |
| 2 | 10.4     | 10.2 - 10.6 | 8      | 57   | 67.6        |

#### Chromatograms:

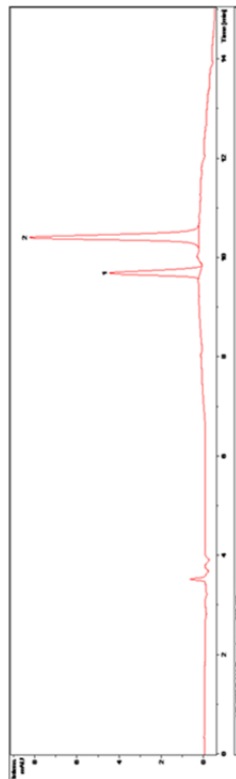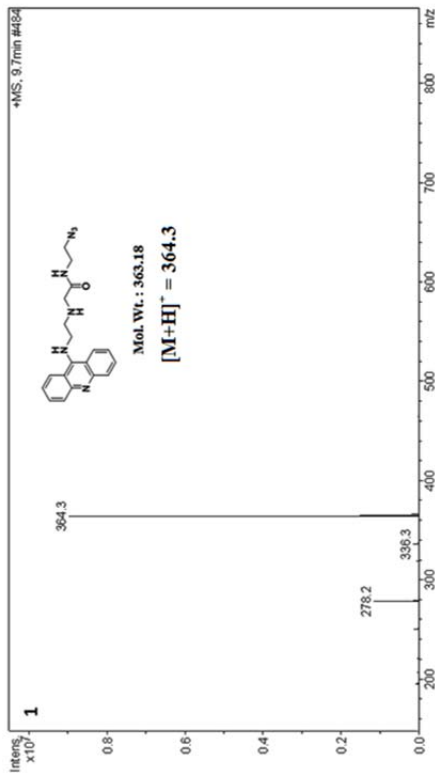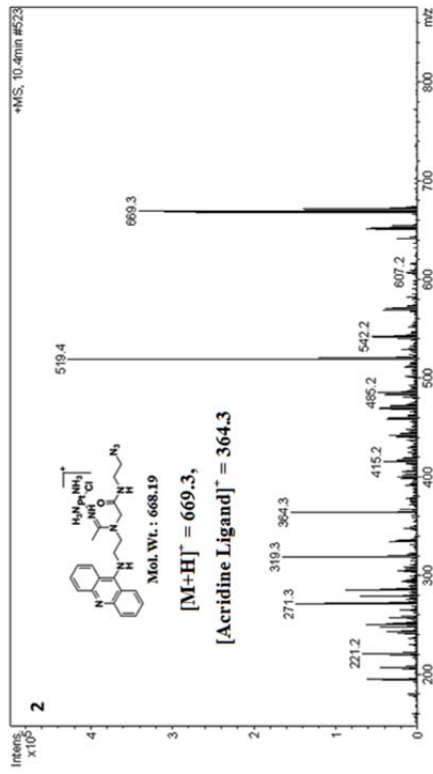

Figure S1.38. LC-ESMS analysis of reaction P4 + A8.

### The Reaction Scheme Of P4-A9

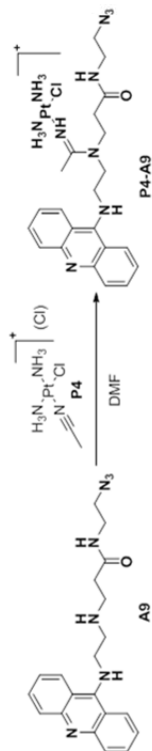

### The LC-MS Analysis Of P4-A9

#### Compound Chromatogram Report - MS

**Analysis Name:** LIB91022.D **Instrument:** LC-MSD-Trap-SL **Print Date:** 06/08/2012 06:21:52 PM  
**Method:** SONG-L-1.M **Operator:** Administrator **Acq. Date:** 5/13/2012 1:52:56 PM  
**Sample Name:** 4-9

**Analysis Info:**

**Acquisition Parameter:**

|                 |             |                       |                |
|-----------------|-------------|-----------------------|----------------|
| Mass Range Mode | Std/Normal  | Trap Drive            | 150 m/z        |
| Ion Polarity    | Positive    | Octopole RF Amplitude | 2200 m/z       |
| Ion Source Type | ESI         | Capillary Exit        | Averages       |
| Dry Temp (Set)  | 350 °C      | Skimmer               | 5 Spectra      |
| Nebulizer (Set) | 50.00 psi   | Oct 1 DC              | Max. Accu Time |
| Dry Gas (Set)   | 11.00 l/min | Oct 2 DC              | ICC Target     |
|                 |             |                       | Charge Control |
|                 |             |                       | on             |

**Compound List:**

| # | RT [min] | Range [min] | Height | Area | Area Frac % |
|---|----------|-------------|--------|------|-------------|
| 1 | 9.5      | 9.4 - 9.7   | 3      | 17   | 14.9        |
| 2 | 10.1     | 10.0 - 10.4 | 15     | 98   | 85.1        |

**Chromatograms:**

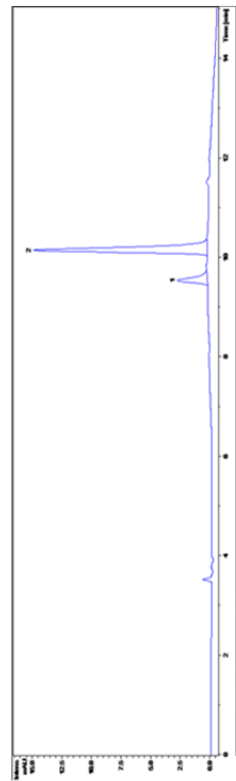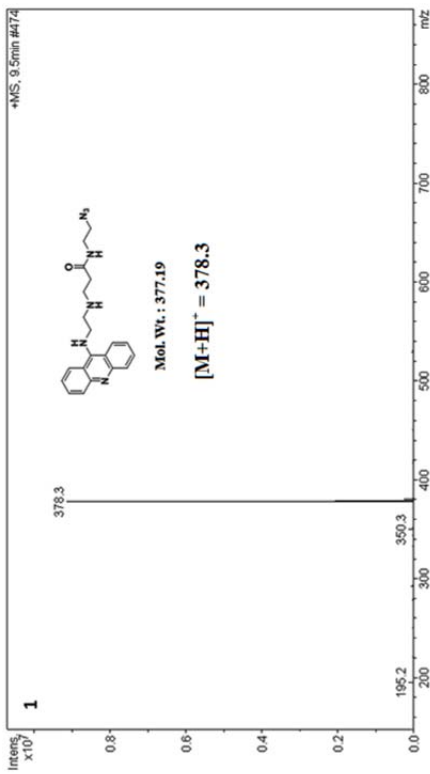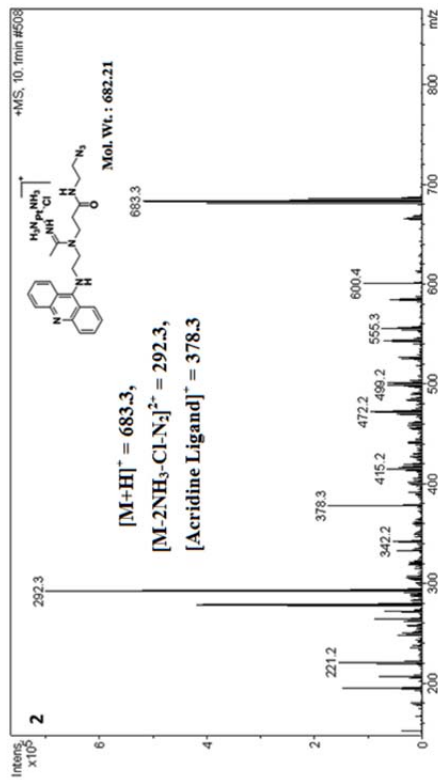

Figure S1.39. LC-ESMS analysis of reaction P4 + A9.

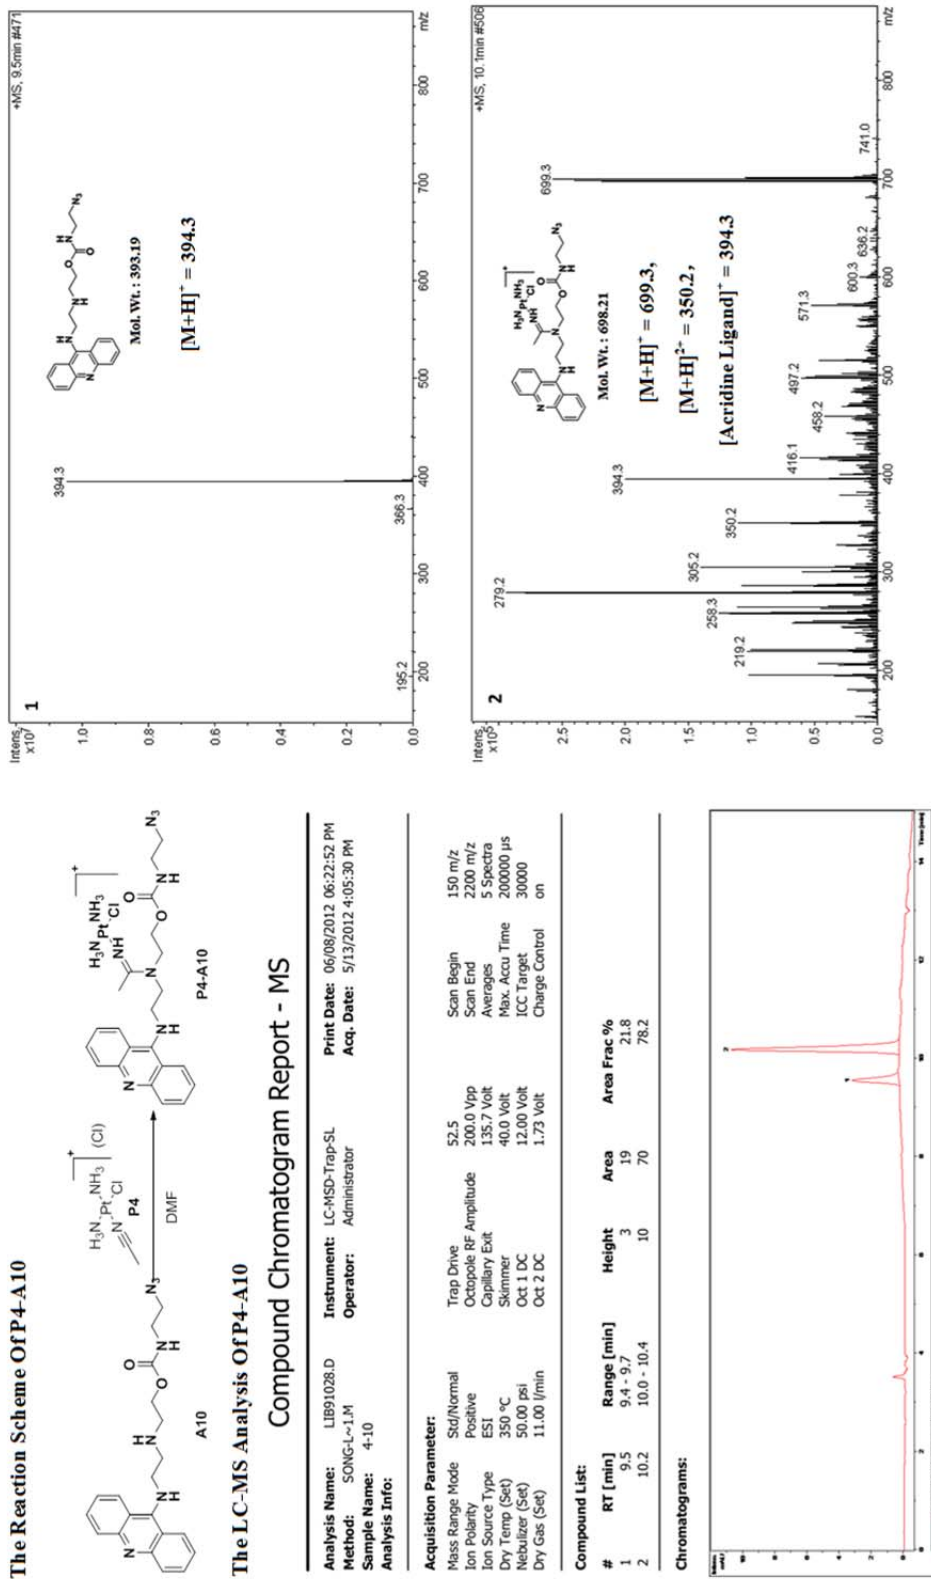

**Figure S1.40. LC-ESMS analysis of reaction P4 + A10.**

### The Reaction Scheme Of P5-A1

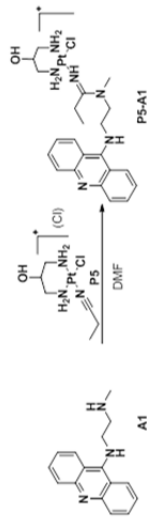

### The LC-MS Analysis Of P5-A1

## Compound Chromatogram Report - MS

**Analysis Name:** LIB05121.D **Instrument:** LC-MSD-Trap-SL **Print Date:** 06/08/2012 06:25:34 PM  
**Method:** SONG-L-1.M **Operator:** Administrator **Acq. Date:** 5/11/2012 4:50:20 PM  
**Sample Name:** 5-1-2  
**Analysis Info:**

**Acquisition Parameter:**  
 Mass Range Mode: Std/Normal **Trap Drive:** 150 m/z  
 Ion Polarity: Positive **Scan Begin:** 2200 m/z  
 Ion Source Type: ESI **Octopole RF Amplitude:** 200.0 Vpp  
 Dry Temp (Set): 350 °C **Capillary Exit:** 135.7 Volt  
 Nebulizer (Set): 50.00 psi **Skimmer:** 40.0 Volt  
 Dry Gas (Set): 11.00 l/min **Oct 1 DC:** 12.00 Volt  
**Oct 2 DC:** 1.73 Volt  
**Charge Control:** on

| # | RT [min] | Range [min] | Height | Area | Area Frac % |
|---|----------|-------------|--------|------|-------------|
| 1 | 8.8      | 8.7 - 9.0   | 2      | 15   | 11.6        |
| 2 | 9.8      | 9.7 - 10.1  | 17     | 111  | 88.4        |

### Chromatograms:

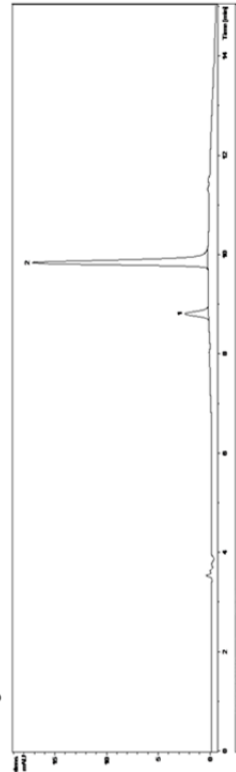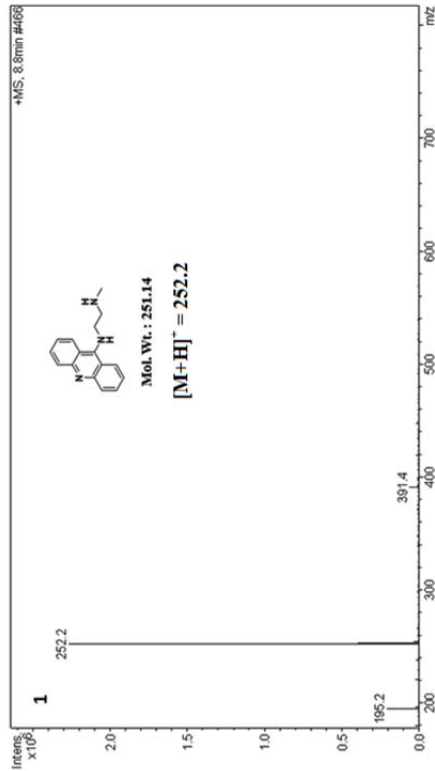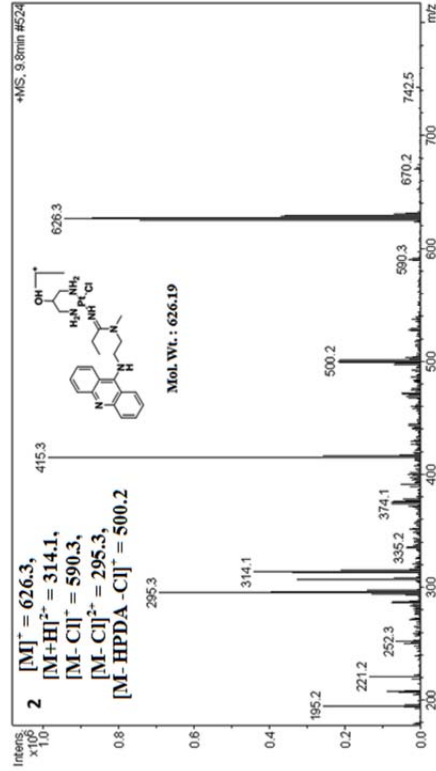

Figure S1.41. LC-ESMS analysis of reaction P5 + A1.

### The Reaction Scheme Of P5-A2

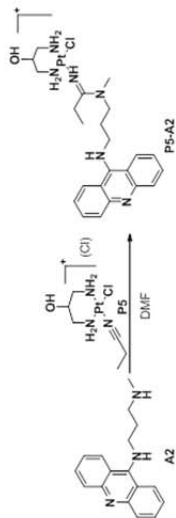

### The LC-MS Analysis Of P5-A2

### Compound Chromatogram Report - MS

**Analysis Name:** 05121238.D **Instrument:** LC-MSD-Trip-SL **Print Date:** 06/08/2012 06:26:49 PM  
**Method:** SONG-L-1.M **Operator:** Administrator **Acq. Date:** 5/11/2012 1:34:06 AM  
**Sample Name:** 5-2  
**Analysis Info:**

#### Acquisition Parameter:

|                 |             |                       |            |                |           |
|-----------------|-------------|-----------------------|------------|----------------|-----------|
| Mass Range Mode | Std/Normal  | Trap Drive            | 52.5       | Scan Begin     | 150 m/z   |
| Ion Polarity    | Positive    | Octopole RF Amplitude | 200.0 Vpp  | Scan End       | 2200 m/z  |
| Ion Source Type | ESI         | Capillary Exit        | 135.7 Volt | Averages       | 5 Spectra |
| Dry Temp (Set)  | 350 °C      | Skimmer               | 40.0 Volt  | Max. Accu Time | 200000 µs |
| Nebulizer (Set) | 50.00 psi   | Oct 1 DC              | 12.00 Volt | ICC Target     | 30000     |
| Dry Gas (Set)   | 11.00 l/min | Oct 2 DC              | 1.73 Volt  | Charge Control | on        |

#### Compound List:

| # | RT [min] | Range [min] | Height | Area | Area Frac % |
|---|----------|-------------|--------|------|-------------|
| 1 | 9.1      | 9.0 - 9.2   | 3      | 18   | 14.9        |
| 2 | 10.1     | 10.0 - 10.3 | 15     | 105  | 85.1        |

#### Chromatograms:

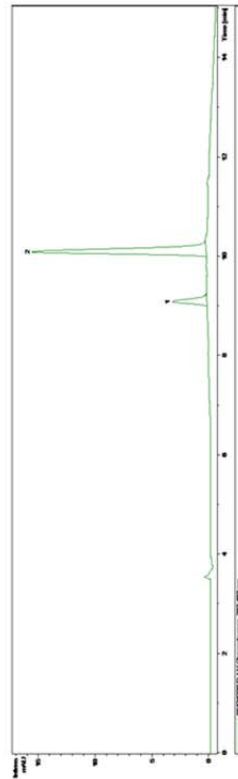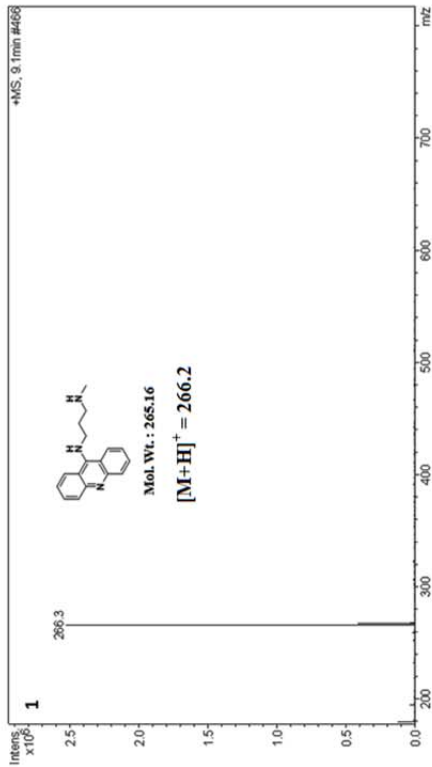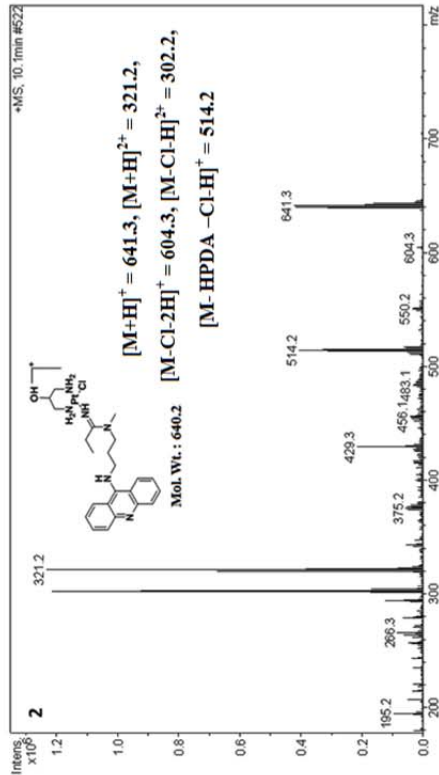

Figure S1.42. LC-ESMS analysis of reaction P5 + A2.

### The Reaction Scheme Of P5-A3

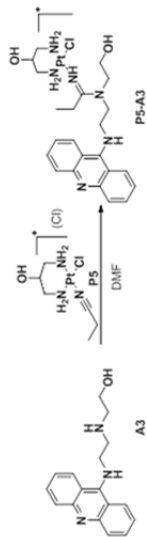

### The LC-MS Analysis Of P5-A3

### Compound Chromatogram Report - MS

**Analysis Name:** LIB-1314.D **Instrument:** LC-MSD-Trap-SL **Print Date:** 06/08/2012 06:28:21 PM  
**Method:** SONG-L-1.M **Operator:** Administrator **Acq. Date:** 5/12/2012 2:06:57 PM  
**Sample Name:** 5-3

#### Analysis Info:

**Acquisition Parameter:**  
 Mass Range Mode: Std/Normal **Trap Drive:** 52.5 **Scan Begin:** 150 m/z  
 Ion Polarity: Positive **Octopole RF Amplitude:** 200.0 Vpp **Scan End:** 2200 m/z  
 Ion Source Type: ESI **Capillary Exit:** 135.7 Volt **Averages:** 5 Spectra  
 Dry Temp (Set): 350 °C **Skimmer:** 40.0 Volt **Max. Accu Time:** 200000 µs  
 Nebulizer (Set): 50.00 psi **Oct 1 DC:** 12.00 Volt **ICC Target:** 30000  
 Dry Gas (Set): 11.00 l/min **Oct 2 DC:** 1.73 Volt **Charge Control:** on

#### Compound List:

| # | RT [min] | Range [min] | Height | Area | Area Frac % |
|---|----------|-------------|--------|------|-------------|
| 1 | 8.9      | 8.7 - 9.0   | 2      | 12   | 10.6        |
| 2 | 9.8      | 9.7 - 10.1  | 14     | 98   | 89.4        |

#### Chromatograms:

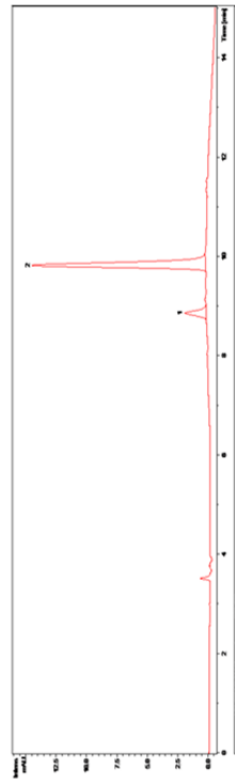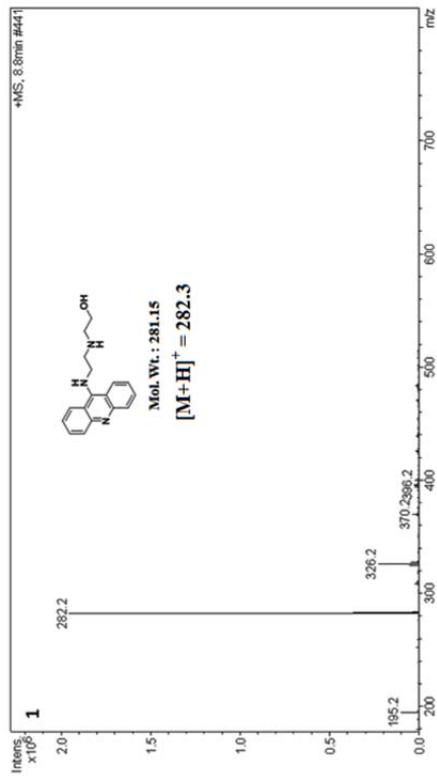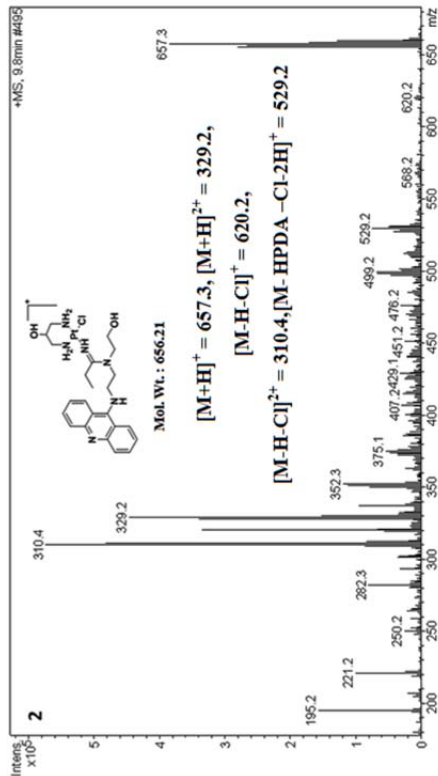

Figure S1.43. LC-ESMS analysis of reaction P5 + A3.

### The Reaction Scheme of P5-A4

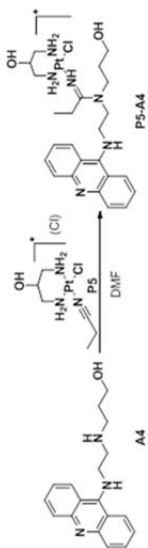

### The LC-MS Analysis of P5-A4

### Compound Chromatogram Report - MS

**Analysis Name:** LIB-1413.D **Instrument:** LC-MSD-Trap-SL **Print Date:** 06/08/2012 06:30:43 PM  
**Method:** SONG-L-1.m **Operator:** Administrator **Acq. Date:** 5/12/2012 3:58:43 PM  
**Sample Name:** 5-4  
**Analysis Info:**

**Acquisition Parameter:**

|                 |             |                       |           |
|-----------------|-------------|-----------------------|-----------|
| Mass Range Mode | Std/Normal  | Trap Drive            | 150 m/z   |
| Ion Polarity    | Positive    | Octopole RF Amplitude | 2200 Vpp  |
| Ion Source Type | ESI         | Capillary Exit        | 5 Spectra |
| Dry Temp (Set)  | 350 °C      | Skimmer               | 200000 µs |
| Nebulizer (Set) | 50.00 psi   | Oct 1 DC              | 30000     |
| Dry Gas (Set)   | 11.00 l/min | Oct 2 DC              | on        |

### Compound List:

| # | RT [min] | Range [min] | Height | Area | Area Frac % |
|---|----------|-------------|--------|------|-------------|
| 1 | 8.9      | 8.8 - 9.0   | 1      | 7    | 6.4         |
| 2 | 9.9      | 9.7 - 10.1  | 15     | 98   | 93.6        |

### Chromatograms:

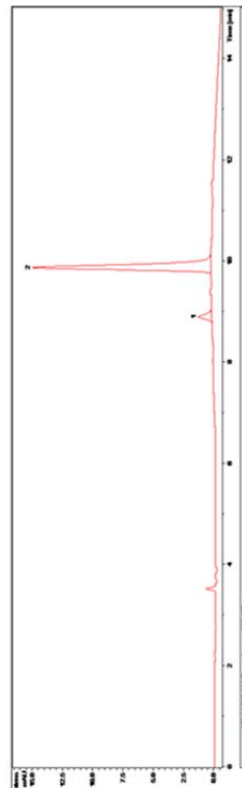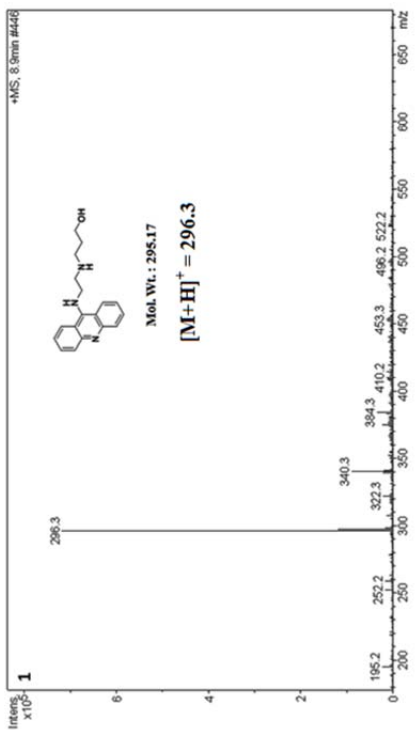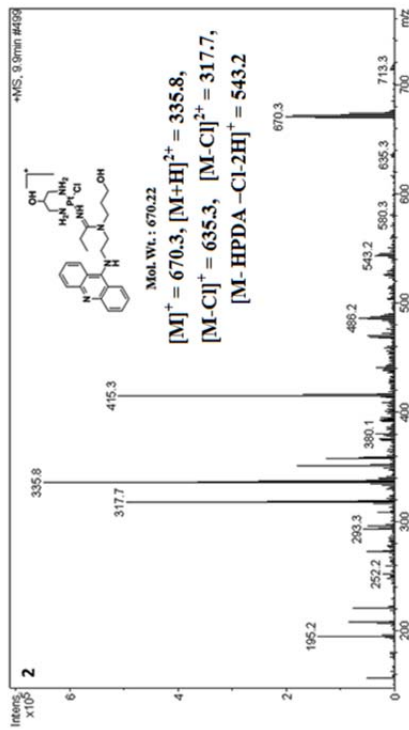

Figure S1.44. LC-ESMS analysis of reaction P5 + A4.



### The Reaction Scheme Of P5-A5

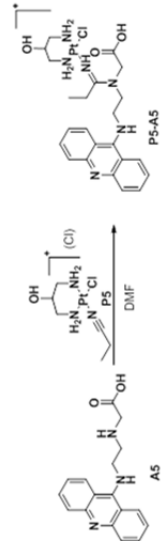

### The LC-MS Analysis Of P5-A5

#### Compound Chromatogram Report - MS

**Analysis Name:** LIB12014.D **Instrument:** LC-MSD-Trip-SL **Print Date:** 06/08/2012 06:34:15 PM  
**Method:** SONG-L-1.M **Operator:** Administrator **Acq. Date:** 5/11/2012 10:29:06 PM  
**Sample Name:** 5-5-1  
**Analysis Info:**

#### Acquisition Parameter:

|                 |             |                       |            |                |           |
|-----------------|-------------|-----------------------|------------|----------------|-----------|
| Mass Range Mode | Std/Normal  | Trap Drive            | 52.5       | Scan Begin     | 150 m/z   |
| Ion Polarity    | Positive    | Octopole RF Amplitude | 200.0 Vpp  | Scan End       | 2200 m/z  |
| Ion Source Type | ESI         | Capillary Exit        | 135.7 Volt | Averages       | 5 Spectra |
| Dry Temp (Set)  | 350 °C      | Skimmer               | 40.0 Volt  | Max. Accu Time | 200000 µs |
| Nebulizer (Set) | 50.00 psi   | Oct 1 DC              | 12.00 Volt | ICC Target     | 30000     |
| Dry Gas (Set)   | 11.00 l/min | Oct 2 DC              | 1.73 Volt  | Charge Control | on        |

#### Compound List:

| # | RT [min] | Range [min] | Height | Area | Area Frac % |
|---|----------|-------------|--------|------|-------------|
| 1 | 9.7      | 9.6 - 9.9   | 8      | 49   | 44.5        |
| 2 | 10.4     | 10.2 - 10.6 | 8      | 61   | 55.5        |

#### Chromatograms:

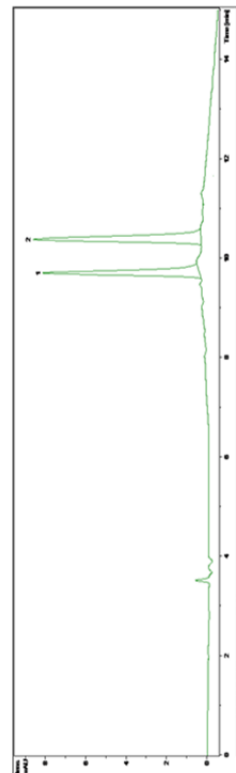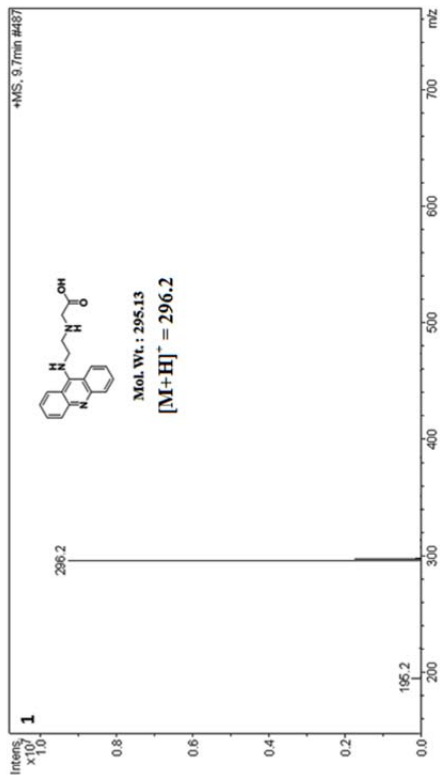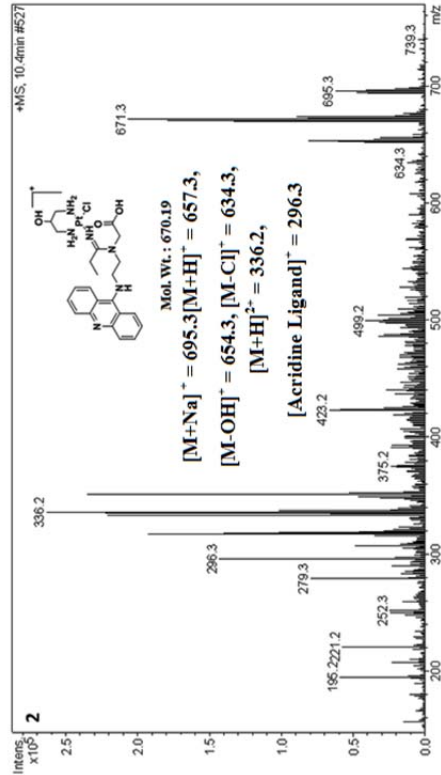

Figure S1.45. LC-ESMS analysis of reaction P5 + A5.

### The Reaction Scheme Of P5-A6

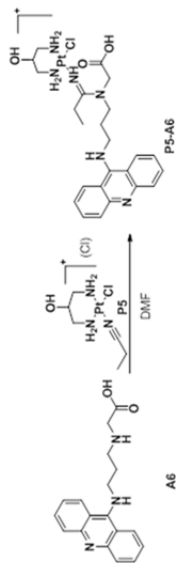

### The LC-MS Analysis Of P5-A6

#### Compound Chromatogram Report - MS

**Analysis Name:** LIB-6014.D **Instrument:** LC-MSD-Trip-SL **Print Date:** 06/08/2012 06:35:24 PM  
**Method:** SONG-L-1.M **Operator:** Administrator **Acq. Date:** 5/12/2012 12:40:14 AM  
**Sample Name:** 5-6

#### Acquisition Parameter:

|                 |             |                       |            |                |           |
|-----------------|-------------|-----------------------|------------|----------------|-----------|
| Mass Range Mode | Std/Normal  | Trap Drive            | 52.5       | Scan Begin     | 150 m/z   |
| Ion Polarity    | Positive    | Octopole RF Amplitude | 200.0 Vpp  | Scan End       | 2200 m/z  |
| Ion Source Type | ESI         | Capillary Exit        | 135.7 Volt | Averages       | 5 Spectra |
| Dry Temp (Set)  | 350 °C      | Skimmer               | 40.0 Volt  | Max. Accu Time | 200000 µs |
| Nebulizer (Set) | 50.00 psi   | Oct 1 DC              | 12.00 Volt | ICC Target     | 30000     |
| Dry Gas (Set)   | 11.00 l/min | Oct 2 DC              | 1.73 Volt  | Charge Control | on        |

#### Compound List:

| # | RT [min] | Range [min] | Height | Area | Area Frac % |
|---|----------|-------------|--------|------|-------------|
| 1 | 10.0     | 9.8 - 10.1  | 4      | 25   | 25.4        |
| 2 | 10.6     | 10.5 - 10.9 | 10     | 73   | 74.6        |

#### Chromatograms:

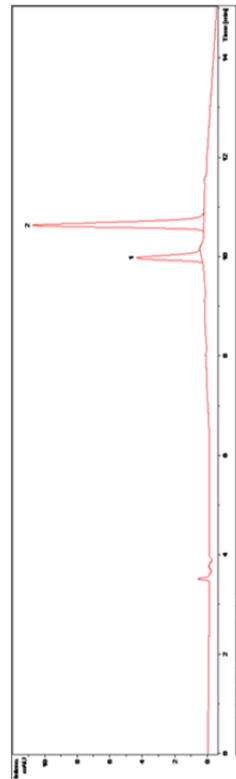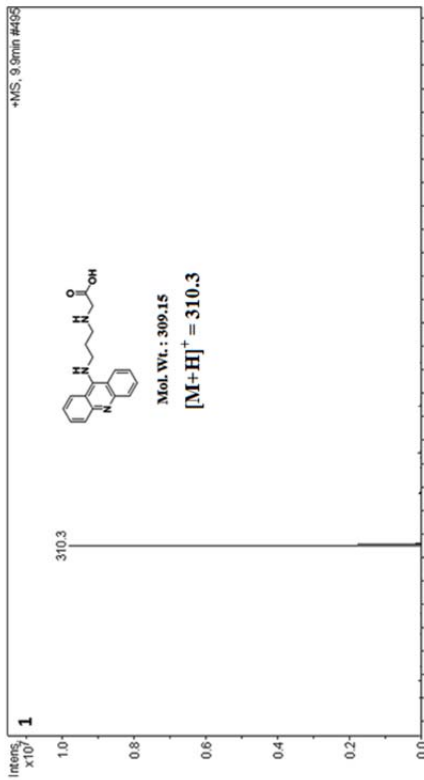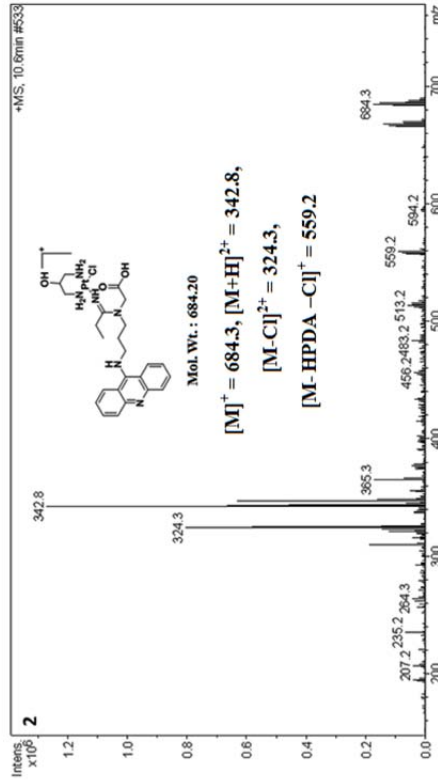

Figure S1.46. LC-ESMS analysis of reaction P5 + A6.

### The Reaction Scheme Of P5-A7

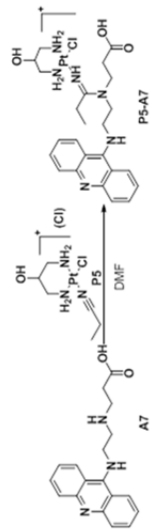

### The LC-MS Analysis Of P5-A7

## Compound Chromatogram Report - MS

**Analysis Name:** LIB-7011.D **Instrument:** LC-MSD-Trap-SL **Print Date:** 06/08/2012 06:36:29 PM  
**Method:** SONG-L~1.M **Operator:** Administrator **Acq. Date:** 5/12/2012 11:49:33 AM  
**Sample Name:** 5-7  
**Analysis Info:**

#### Acquisition Parameter:

|                 |             |                       |            |                |           |
|-----------------|-------------|-----------------------|------------|----------------|-----------|
| Mass Range Mode | Std/Normal  | Trap Drive            | 52.5       | Scan Begin     | 150 m/z   |
| Ion Polarity    | Positive    | Octopole RF Amplitude | 200.0 Vpp  | Scan End       | 2200 m/z  |
| Ion Source Type | ESI         | Capillary Exit        | 135.7 Volt | Averages       | 5 Spectra |
| Dry Temp (Set)  | 350 °C      | Skimmer               | 40.0 Volt  | Max. Accu Time | 200000 µs |
| Nebulizer (Set) | 50.00 psi   | Oct 1 DC              | 12.00 Volt | ICC Target     | 30000     |
| Dry Gas (Set)   | 11.00 l/min | Oct 2 DC              | 1.73 Volt  | Charge Control | on        |

#### Compound List:

| # | RT [min] | Range [min] | Height | Area | Area Frac % |
|---|----------|-------------|--------|------|-------------|
| 1 | 9.2      | 9.0 - 9.4   | 8      | 51   | 43.0        |
| 2 | 10.0     | 9.9 - 10.3  | 10     | 68   | 57.0        |

#### Chromatograms:

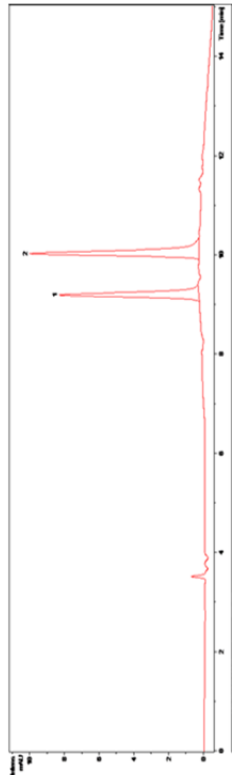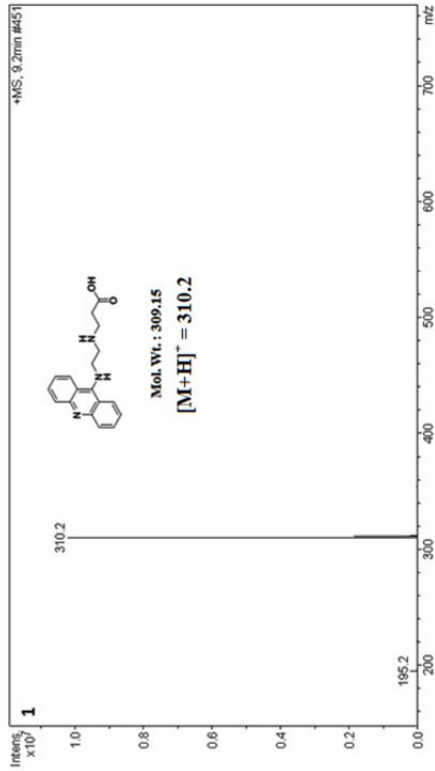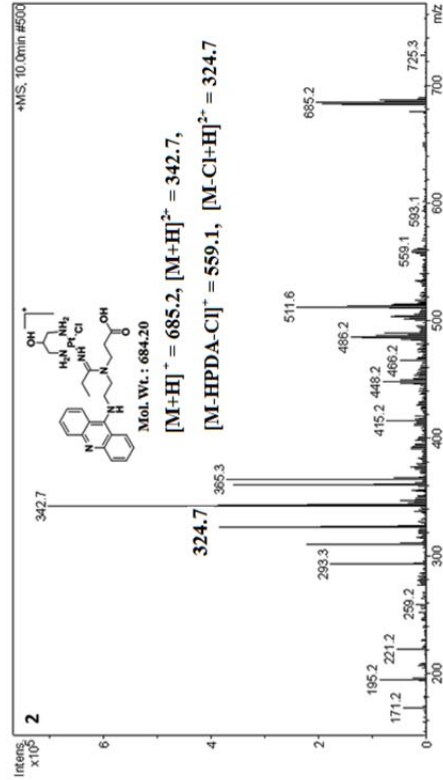

Figure S1.47. LC-ESMS analysis of reaction P5 + A7.

### The Reaction Scheme Of P5-A8

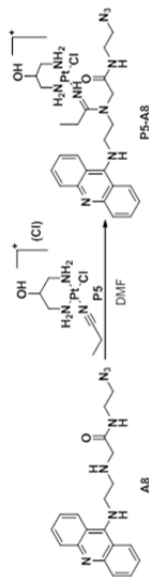

### The LC-MS Analysis Of P5-A8

#### Compound Chromatogram Report - MS

Analysis Name: LIB-1823.D Instrument: LC-MSD-Trap-SL Print Date: 06/08/2012 06:38:16 PM  
 Method: SONG-L-1.M Operator: Administrator Acq. Date: 5/12/2012 11:40:35 PM  
 Sample Name: 5-8

#### Acquisition Parameter:

|                 |             |                |                |
|-----------------|-------------|----------------|----------------|
| Mass Range Mode | Std/Normal  | Trap Drive     | 150 m/z        |
| Ion Polarity    | Positive    | Scan Begin     | 2200 m/z       |
| Ion Source Type | ESI         | Scan End       | 5 Spectra      |
| Dry Temp (Set)  | 350 °C      | Averages       | 200000 us      |
| Nebulizer (Set) | 50.00 psi   | Max. Accu Time | 30000          |
| Dry Gas (Set)   | 11.00 l/min | ICC Target     | Charge Control |
|                 |             | Charge Control | on             |

#### Compound List:

| # | RT [min] | Range [min] | Height | Area | Area Frac % |
|---|----------|-------------|--------|------|-------------|
| 1 | 9.7      | 9.6 - 9.8   | 5      | 29   | 42.4        |
| 2 | 10.7     | 10.5 - 11.0 | 5      | 40   | 57.6        |

#### Chromatograms:

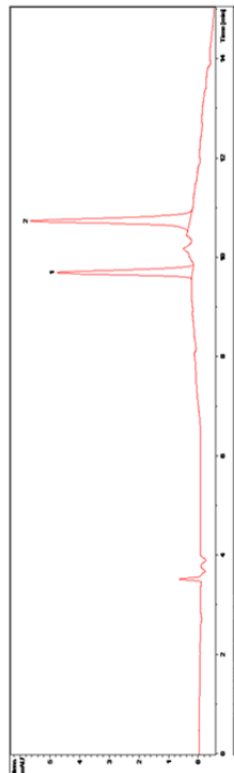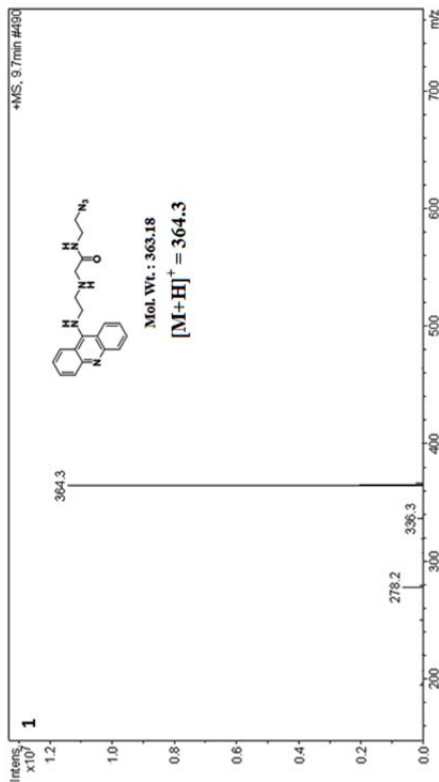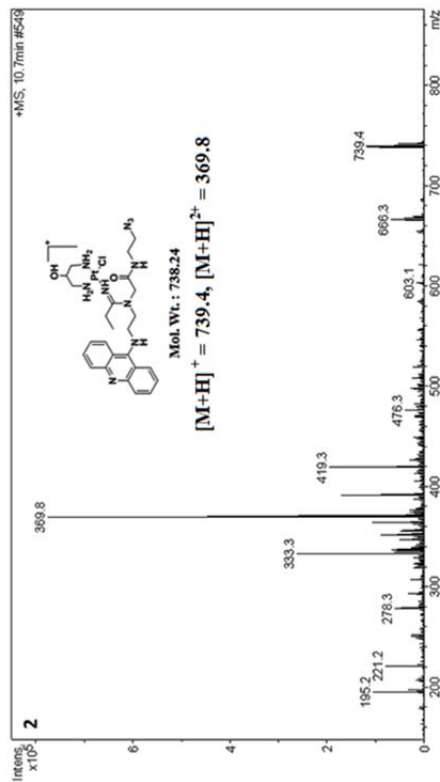

Figure S1.48. LC-ESMS analysis of reaction P5 + A8.

### The Reaction Scheme Of P5-A9

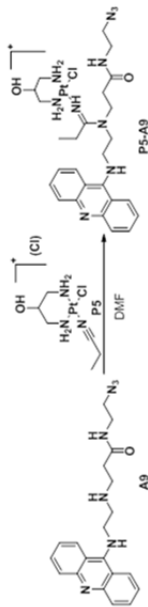

### The LC-MS Analysis Of P5-A9

### Compound Chromatogram Report - MS

**Analysis Name:** LIB91023.D **Instrument:** LC-MSD-Trip-SL **Print Date:** 06/08/2012 06:40:31 PM  
**Method:** SONG-L-1.M **Operator:** Administrator **Acq. Date:** 5/13/2012 2:14:57 PM  
**Sample Name:** 5-9

#### Acquisition Parameter:

|                 |             |                       |            |                |           |
|-----------------|-------------|-----------------------|------------|----------------|-----------|
| Mass Range Mode | Std/Normal  | Trap Drive            | 52.5       | Scan Begin     | 150 m/z   |
| Ion Polarity    | Positive    | Octopole RF Amplitude | 200.0 Vpp  | Scan End       | 2200 m/z  |
| Ion Source Type | ESI         | Capillary Exit        | 135.7 Volt | Averages       | 5 Spectra |
| Dry Temp (Set)  | 350 °C      | Skimmer               | 40.0 Volt  | Max. Accu Time | 200000 µs |
| Nebulizer (Set) | 50.00 psi   | Oct 1 DC              | 12.00 Volt | ICC Target     | 30000     |
| Dry Gas (Set)   | 11.00 l/min | Oct 2 DC              | 1.73 Volt  | Charge Control | on        |

#### Compound List:

| # | RT [min] | Range       | Height | Area | Area Frac % |
|---|----------|-------------|--------|------|-------------|
| 1 | 9.5      | 9.4 - 9.7   | 4      | 26   | 21.2        |
| 2 | 10.4     | 10.2 - 10.6 | 13     | 96   | 78.8        |

#### Chromatograms:

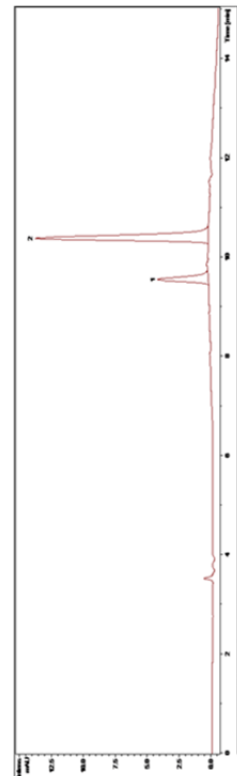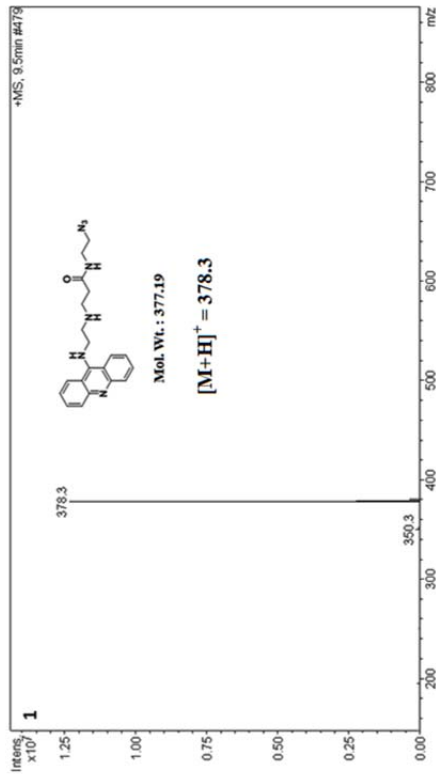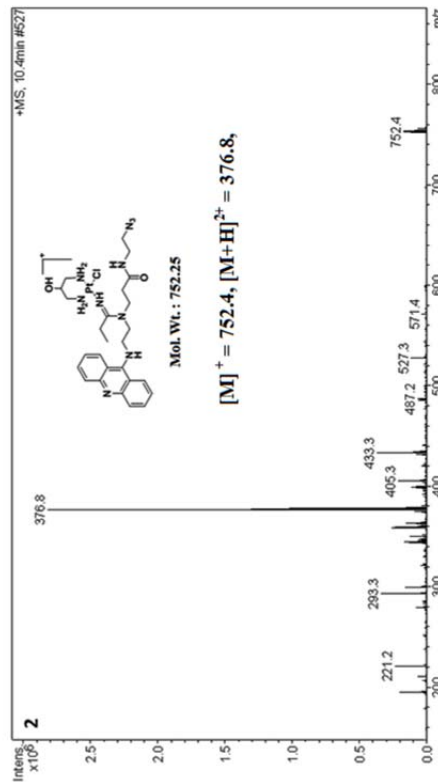

Figure S1.49. LC-ESMS analysis of reaction P5 + A9.

### The Reaction Scheme Of P5-A10

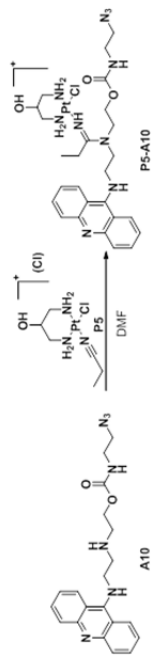

### The LC-MS Analysis Of P5-A10

#### Compound Chromatogram Report - MS

Analysis Name: LIB91029.D Instrument: LC-MSD-Trap-SL Print Date: 06/08/2012 06:42:21 PM  
 Method: SONG-L-1.M Operator: Administrator Acq. Date: 5/13/2012 4:27:30 PM  
 Sample Name: 5-10  
 Analysis Info:

Acquisition Parameters:

|                 |             |                       |            |
|-----------------|-------------|-----------------------|------------|
| Mass Range Mode | Std/Normal  | Trap Drive            | 150 m/z    |
| Ion Polarity    | Positive    | Octopole RF Amplitude | 2200 m/z   |
| Ion Source Type | ESI         | Capillary Exit        | 5 Spectra  |
| Dry Temp (Set)  | 350 °C      | Skimmer               | 40.0 Volt  |
| Nebulizer (Set) | 50.00 psi   | Oct 1 DC              | 12.00 Volt |
| Dry Gas (Set)   | 11.00 l/min | Oct 2 DC              | 1.73 Volt  |
|                 |             | Charge Control        | on         |

#### Compound List:

| # | RT [min] | Range [min] | Height | Area | Area Frac % |
|---|----------|-------------|--------|------|-------------|
| 1 | 9.5      | 9.4 - 9.7   | 3      | 22   | 25.7        |
| 2 | 10.4     | 10.2 - 10.7 | 9      | 63   | 74.3        |

#### Chromatograms:

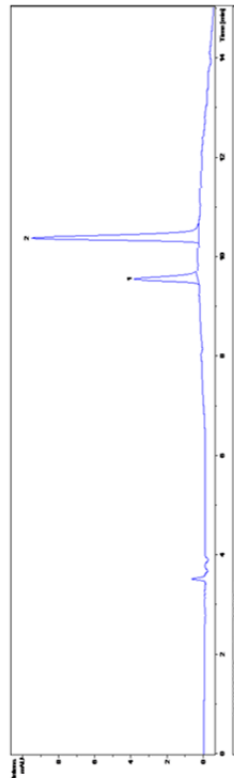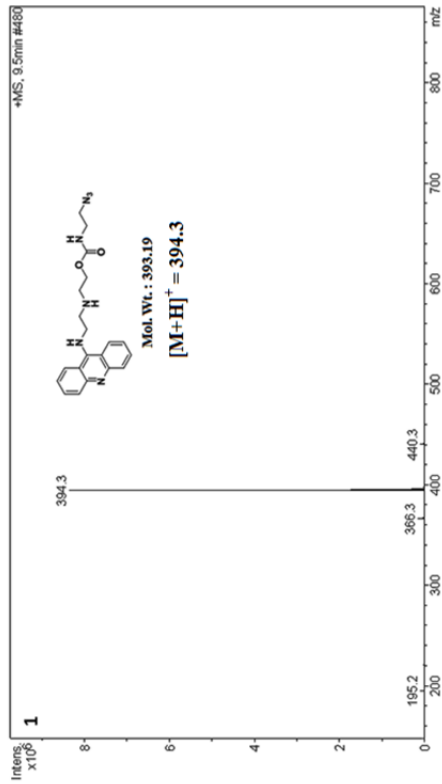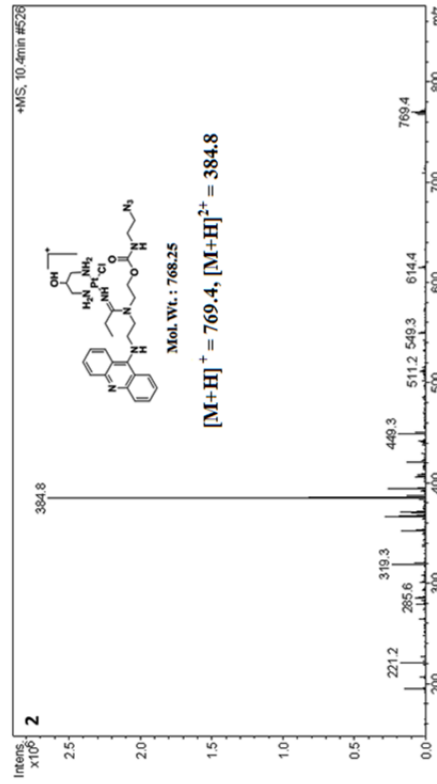

Figure S1.50. LC-ESMS analysis of reaction P5 + A10.

### The Reaction Scheme Of P6-A1

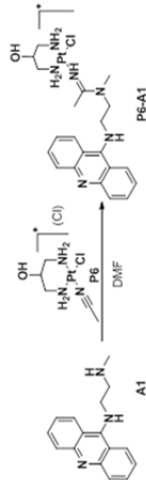

### The LC-MS Analysis Of P6-A1

### Compound Chromatogram Report - MS

**Analysis Name:** LIB05122.D **Instrument:** LC-MSD-Trap-SL **Print Date:** 06/08/2012 06:43:50 PM  
**Method:** SONG-L-1.M **Operator:** Administrator **Acq. Date:** 5/11/2012 5:13:49 PM  
**Sample Name:** 6-1-2

#### Analysis Info:

**Acquisition Parameter:**  
 Mass Range Mode: Std/Normal **Trap Drive:** 52.5 **Scan Begin:** 150 m/z  
 Ion Polarity: Positive **Octopole RF Amplitude:** 200.0 Vpp **Scan End:** 2200 m/z  
 Ion Source Type: ESI **Capillary Exit:** 135.7 Volt **Averages:** 5 Spectra  
 Dry Temp (Set): 350 °C **Skimmer:** 40.0 Volt **Max. Accu. Time:** 200000 µs  
 Nebulizer (Set): 50.00 psi **Oct 1 DC:** 12.00 Volt **ICC Target:** 30000  
 Dry Gas (Set): 11.00 l/min **Oct 2 DC:** 1.73 Volt **Charge Control:** on

#### Compound List:

| # | RT [min] | Range [min] | Height | Area | Area Frac % |
|---|----------|-------------|--------|------|-------------|
| 1 | 8.8      | 8.7 - 9.0   | 4      | 24   | 21.2        |
| 2 | 9.6      | 9.5 - 9.8   | 14     | 88   | 78.8        |

#### Chromatograms:

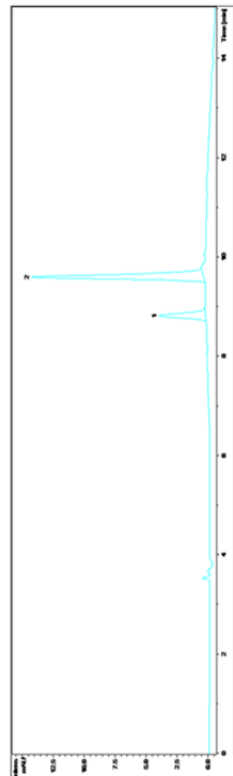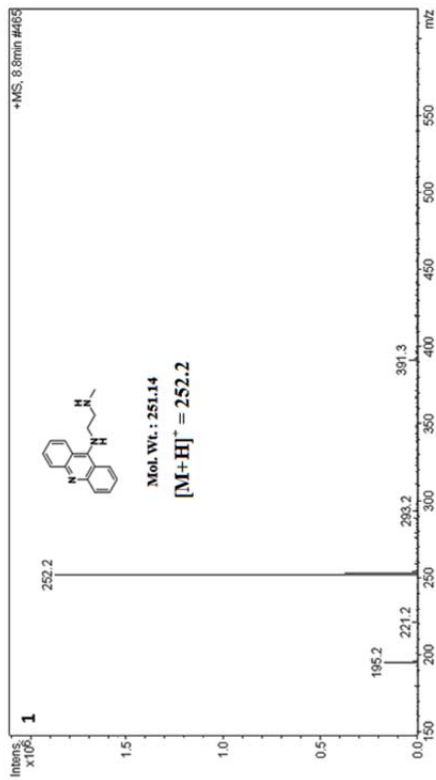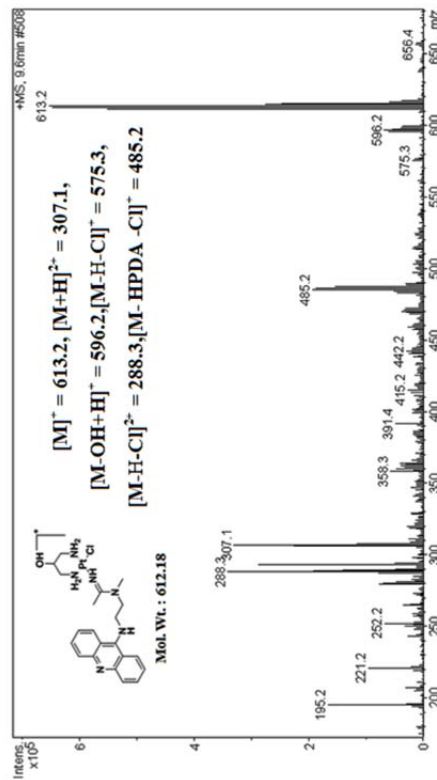

Figure S1.51. LC-ESMS analysis of reaction P6 + A1.

The Reaction Scheme Of P6-A2

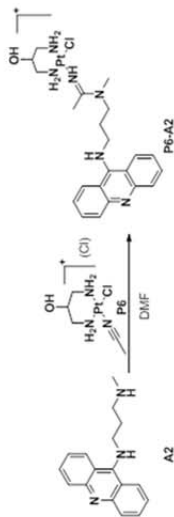

The LC-MS Analysis Of P6-A2

Compound Chromatogram Report - MS

Analysis Name: LIB05125-D Instrument: LC-MSD-Trap-SL Print Date: 06/08/2012 06:45:34 PM  
 Method: SONG-L-1.M Operator: Administrator Acq. Date: 5/11/2012 6:24:23 PM  
 Sample Name: 6-2-2  
 Analysis Info:

| Acquisition Parameter: |             | Trap Drive |                | Scan Begin |           |
|------------------------|-------------|------------|----------------|------------|-----------|
| Mass Range Mode        | Std/Normal  | 52.5       | 150 m/z        | Scan End   | 2200 m/z  |
| Ion Polarity           | Positive    | 200.0 Vpp  | 5 Spectra      | Averages   | 5 Spectra |
| Ion Source Type        | ESI         | 135.7 Volt | Max. Accu Time | ICC Target | 200000 µs |
| Dry Temp (Set)         | 350 °C      | 40.0 Volt  | Charge Control | on         |           |
| Nebulizer (Set)        | 50.00 psi   | 12.00 Volt |                |            |           |
| Dry Gas (Set)          | 11.00 l/min | 1.73 Volt  |                |            |           |

| Compound List: |          |             |      |             |
|----------------|----------|-------------|------|-------------|
| #              | RT [min] | Range [min] | Area | Area Frac % |
| 1              | 9.1      | 9.0 - 9.3   | 36   | 27.9        |
| 2              | 9.8      | 9.7 - 10.1  | 15   | 94          |

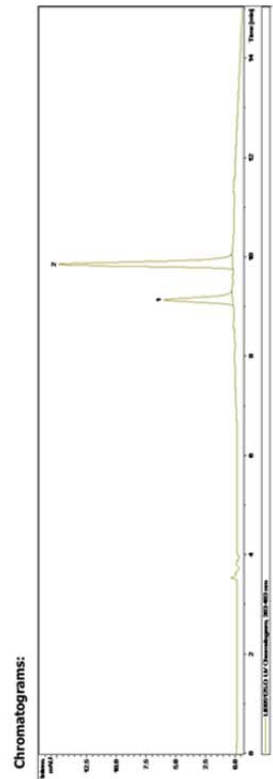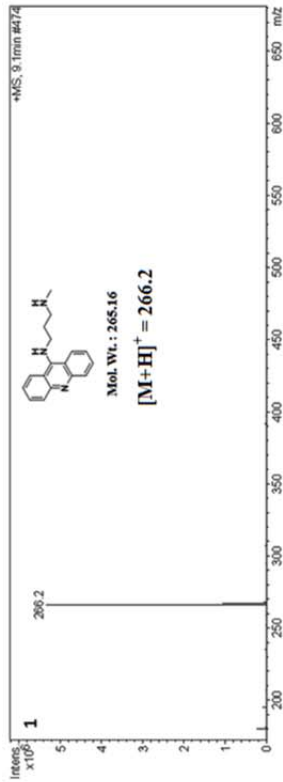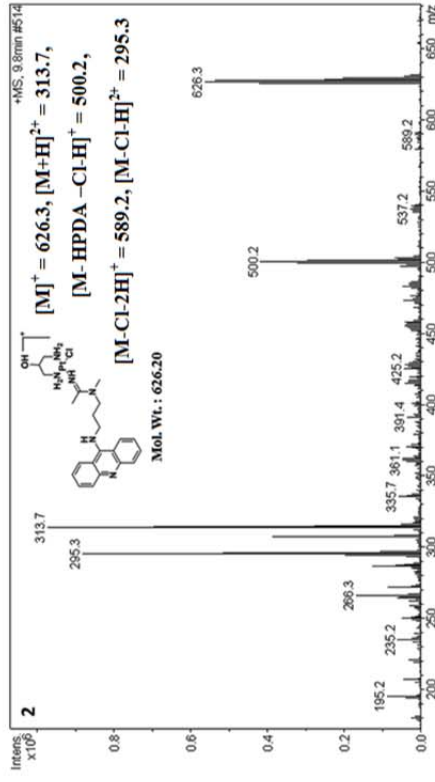

Figure S1.52. LC-ESMS analysis of reaction P6 + A2.



### The Reaction Scheme Of P6-A3

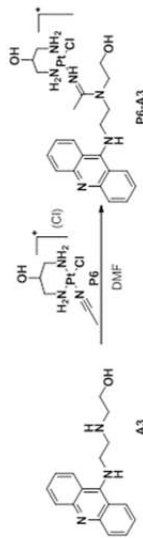

### The LC-MS Analysis Of P6-A3

### Compound Chromatogram Report - MS

Analysis Name: LIB-1315.D Instrument: LC-MSD-Trop-SL Print Date: 06/08/2012 06:47:25 PM  
 Method: SONG-L-1.M Operator: Administrator Acq. Date: 5/12/2012 2:28:54 PM  
 Sample Name: 6-3

#### Acquisition Parameter:

|                 |             |                       |            |                |           |
|-----------------|-------------|-----------------------|------------|----------------|-----------|
| Mass Range Mode | Std/Normal  | Trap Drive            | 52.5       | Scan Begin     | 150 m/z   |
| Ion Polarity    | Positive    | Octopole RF Amplitude | 200.0 Vpp  | Scan End       | 2200 m/z  |
| Ion Source Type | ESI         | Capillary Exit        | 135.7 Volt | Averages       | 5 Spectra |
| Dry Temp (Set)  | 350 °C      | Slimmer               | 40.0 Volt  | Max. Accu Time | 200000 µs |
| Nebulizer (Set) | 50.00 psi   | Oct 1 DC              | 12.00 Volt | ICC Target     | 30000     |
| Dry Gas (Set)   | 11.00 l/min | Oct 2 DC              | 1.73 Volt  | Charge Control | on        |

#### Compound List:

| # | RT [min] | Range [min] | Height | Area | Area Frac % |
|---|----------|-------------|--------|------|-------------|
| 1 | 8.9      | 8.7 - 9.0   | 3      | 19   | 18.1        |
| 2 | 9.6      | 9.4 - 9.8   | 13     | 87   | 81.9        |

#### Chromatograms:

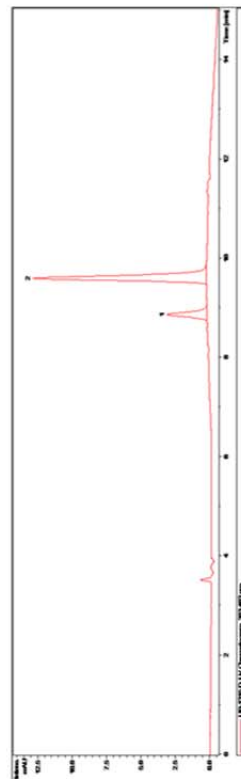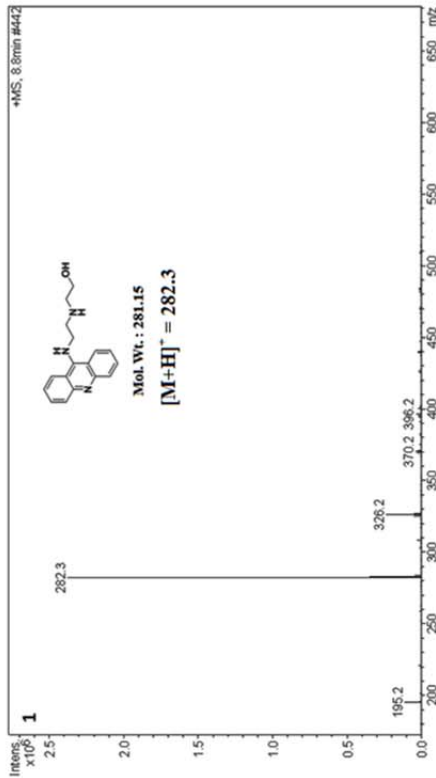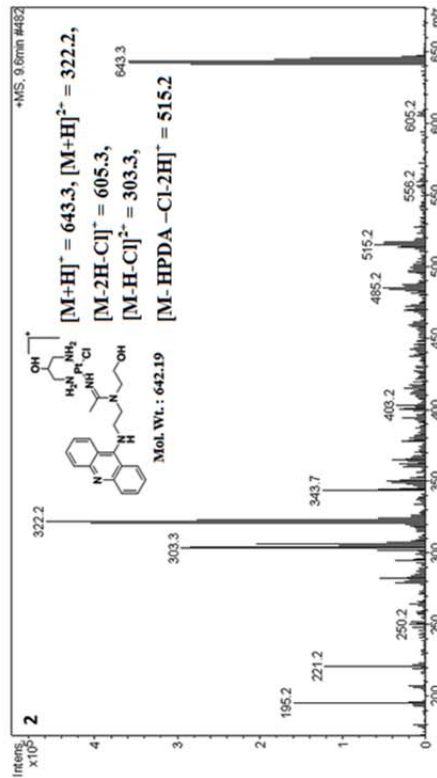

Figure S1.53. LC-ESMS analysis of reaction P6 + A3.

### The Reaction Scheme Of P6-A4

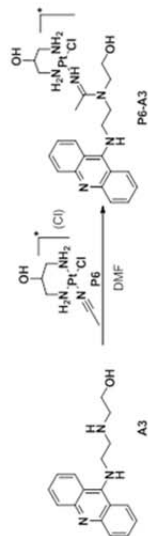

### The LC-MS Analysis Of P6-A4

### Compound Chromatogram Report - MS

**Analysis Name:** 05121251.D **Instrument:** LC-MSD-Trap-SL **Print Date:** 06/08/2012 06:49:23 PM  
**Method:** SONG-L-1.M **Operator:** Administrator **Acq. Date:** 5/11/2012 6:40:16 AM  
**Sample Name:** 6-4  
**Analysis Info:**

#### Acquisition Parameter:

|                 |             |                       |            |                |           |
|-----------------|-------------|-----------------------|------------|----------------|-----------|
| Mass Range Mode | Std/Normal  | Trap Drive            | 52.5       | Scan Begin     | 150 m/z   |
| Ion Polarity    | Positive    | Octopole RF Amplitude | 200.0 Vpp  | Scan End       | 2200 m/z  |
| Ion Source Type | ESI         | Capillary Exit        | 135.7 Volt | Averages       | 5 Spectra |
| Dry Temp (Set)  | 350 °C      | Skimmer               | 40.0 Volt  | Max. Accu Time | 200000 µs |
| Nebulizer (Set) | 50.00 psi   | Oct 1 DC              | 12.00 Volt | ICC Target     | 30000     |
| Dry Gas (Set)   | 11.00 l/min | Oct 2 DC              | 1.73 Volt  | Charge Control | on        |

#### Compound List:

| # | RT [min] | Range [min] | Height | Area | Area Frac % |
|---|----------|-------------|--------|------|-------------|
| 1 | 8.8      | 8.7 - 9.0   | 2      | 9    | 9.8         |
| 2 | 9.6      | 9.4 - 9.9   | 13     | 85   | 90.2        |

#### Chromatograms:

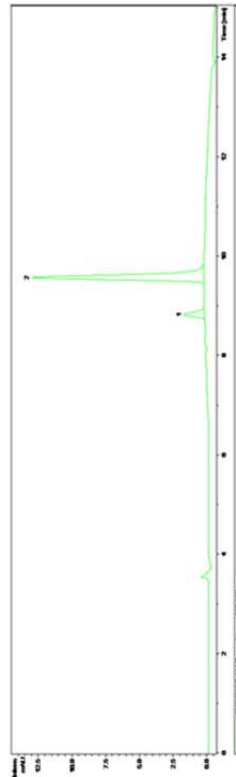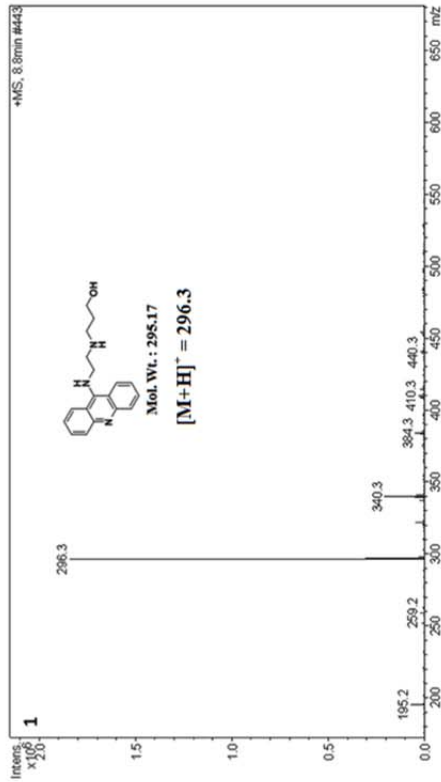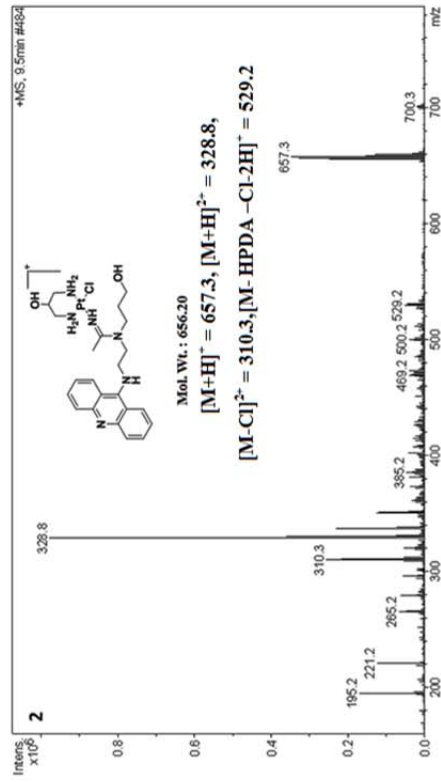

Figure S1.54. LC-ESMS analysis of reaction P6 + A4.

### The Reaction Scheme Of P6-A5

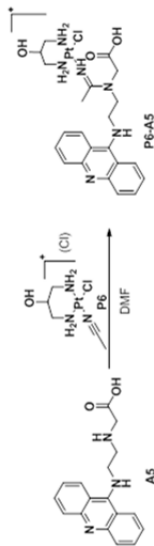

### The LC-MS Analysis Of P6-A5

### Compound Chromatogram Report - MS

Analysis Name: LIB12015.D Instrument: LC-MSD-Trip-SL Print Date: 06/08/2012 06:52:12 PM  
 Method: SONG-L-1.M Operator: Administrator Acq. Date: 5/11/2012 10:51:10 PM  
 Sample Name: 6-5-1  
 Analysis Info:

| Mass Range | Std/Normal  | Trap Drive | Scan Begin     | Scan End  |
|------------|-------------|------------|----------------|-----------|
| 9.5 - 9.9  | Positive    | 52.5       | 150 m/z        | 2200 m/z  |
| 9.9 - 10.3 | ESI         | 200.0 Vpp  | Averages       | 5 Spectra |
|            | 350 °C      | 135.7 Volt | Max. Accu Time | 200000 µs |
|            | 50.00 psi   | 40.0 Volt  | ICC Target     | 30000     |
|            | 11.00 l/min | 12.00 Volt | Charge Control | on        |

| Compound List: | RT [min] | Range [min] | Height | Area | Area Frac % |
|----------------|----------|-------------|--------|------|-------------|
| 1              | 9.7      | 9.5 - 9.9   | 9      | 59   | 53.1        |
| 2              | 10.1     | 9.9 - 10.3  | 7      | 53   | 46.9        |

### Chromatograms:

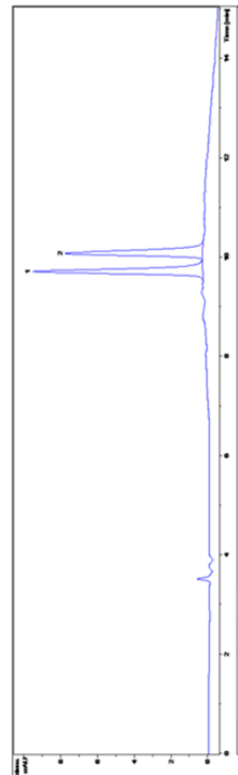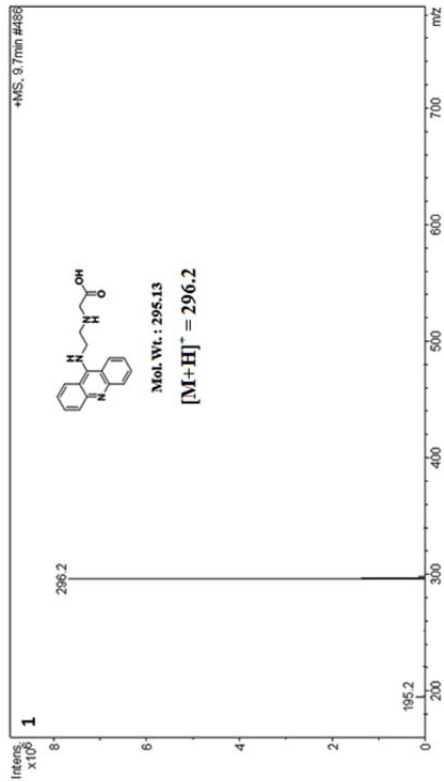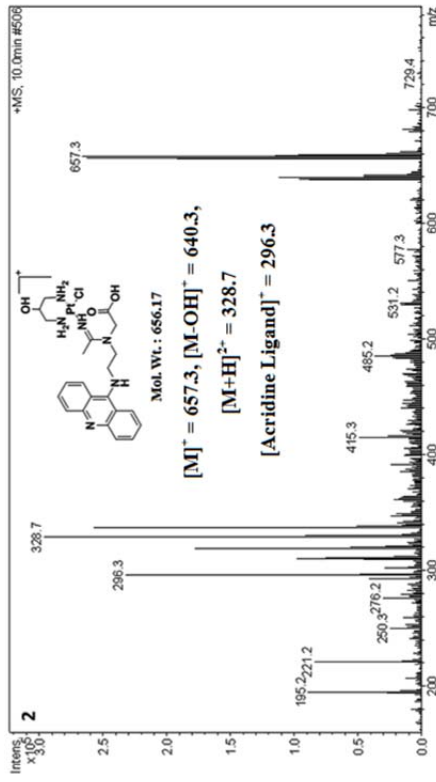

Figure S1.55. LC-ESMS analysis of reaction P6 + A5.

### The Reaction Scheme Of P6-A6

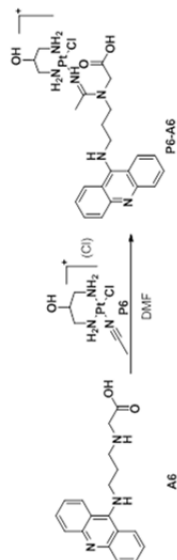

### The LC-MS Analysis Of P6-A6

### Compound Chromatogram Report - MS

**Analysis Name:** LIB-6015.D **Instrument:** LC-MSD-Trap-SL **Print Date:** 06/08/2012 06:53:34 PM  
**Method:** SONG-L-1.M **Operator:** Administrator **Acq. Date:** 5/12/2012 1:02:13 AM  
**Sample Name:** 6-6  
**Analysis Info:**

**Acquisition Parameter:**  
 Mass Range Mode: Std/Normal **Trap Drive:** 150 m/z  
 Ion Polarity: Positive **Scan End:** 2200 m/z  
 Ion Source Type: ESI **Octopole RF Amplitude:** 5 Spectra  
 Dry Temp (Set): 350 °C **Capillary Exit:** 40.0 Volt **Max. Accu. Time:** 200000 µs  
 Nebulizer (Set): 50.00 psi **Oct 1 DC:** 12.00 Volt **ICC Target:** 30000  
 Dry Gas (Set): 11.00 l/min **Oct 2 DC:** 1.73 Volt **Charge Control:** on

**Compound List:**

| # | RT [min] | Range [min] | Height | Area | Area Frac % |
|---|----------|-------------|--------|------|-------------|
| 1 | 10.0     | 9.9 - 10.2  | 6      | 39   | 36.4        |
| 2 | 10.3     | 10.2 - 10.6 | 10     | 68   | 63.6        |

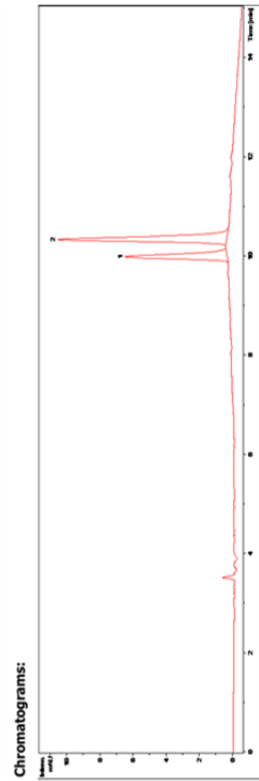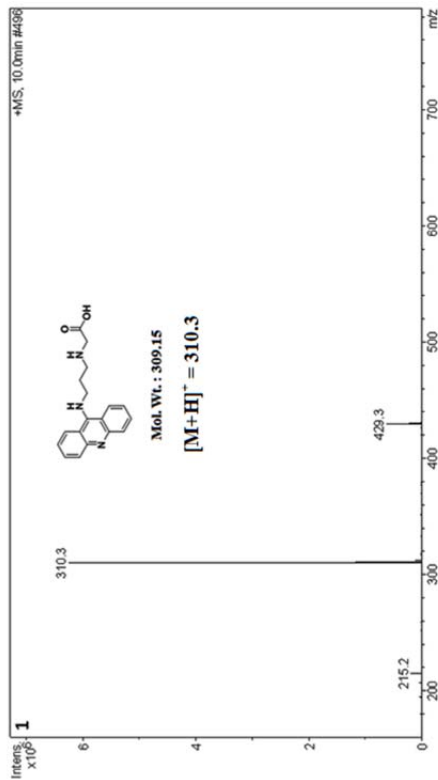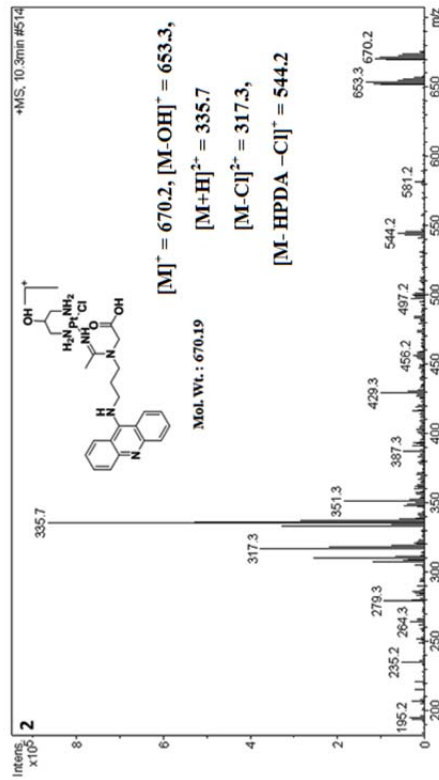

Figure S1.56. LC-ESMS analysis of reaction P6 + A6.

### The Reaction Scheme Of P6-A7

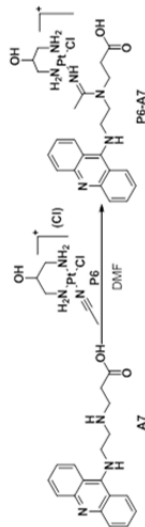

### The LC-MS Analysis Of P6-A7

#### Compound Chromatogram Report - MS

Analysis Name: LIB-7012.D Instrument: LC-MSD-Trap-SL Print Date: 06/08/2012 06:57:22 PM  
 Method: SONG-L-1.M Operator: Administrator Acq. Date: 5/12/2012 12:11:37 PM  
 Sample Name: 6-7  
 Analysis Info:

Acquisition Parameters:

|                 |             |                       |            |                |           |
|-----------------|-------------|-----------------------|------------|----------------|-----------|
| Mass Range Mode | Std/Normal  | Trap Drive            | 52.5       | Scan Begin     | 150 m/z   |
| Ion Polarity    | Positive    | Octopole RF Amplitude | 200.0 Vpp  | Scan End       | 2200 m/z  |
| Ion Source Type | ESI         | Capillary Exit        | 135.7 Volt | Averages       | 5 Spectra |
| Dry Temp (Set)  | 350 °C      | Skimmer               | 40.0 Volt  | Max. Accu Time | 200000 µs |
| Nebulizer (Set) | 50.00 psi   | Oct 1 DC              | 12.00 Volt | ICC Target     | 30000     |
| Dry Gas (Set)   | 11.00 l/min | Oct 2 DC              | 1.73 Volt  | Charge Control | on        |

#### Compound List:

| # | RT [min] | Range [min] | Height | Area | Area Frac % |
|---|----------|-------------|--------|------|-------------|
| 1 | 9.2      | 9.0 - 9.4   | 7      | 48   | 40.2        |
| 2 | 9.8      | 9.7 - 10.0  | 11     | 71   | 59.8        |

#### Chromatograms:

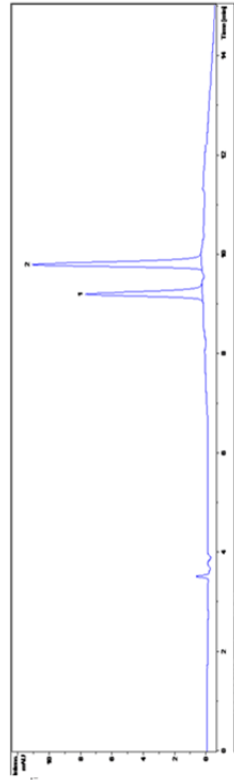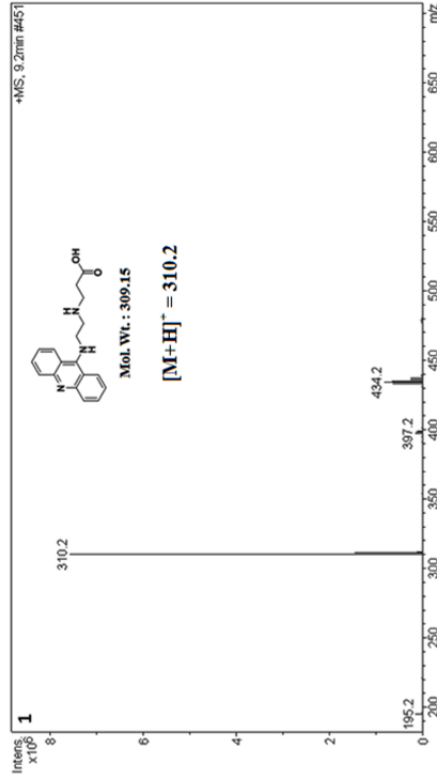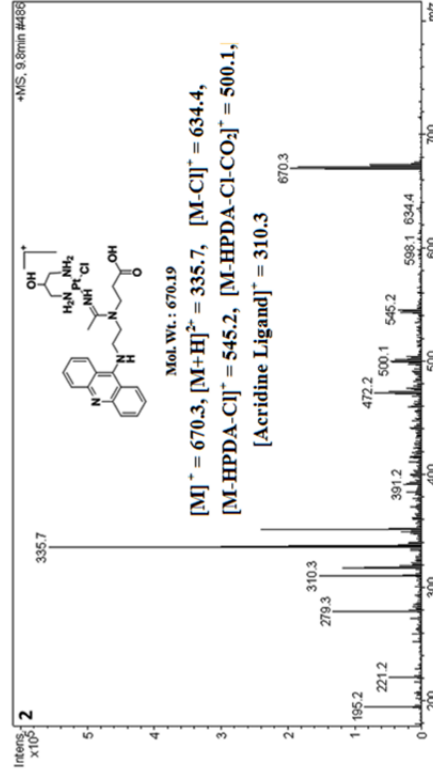

Figure S1.57. LC-ESMS analysis of reaction P6 + A7.

### The Reaction Scheme Of P6-A8

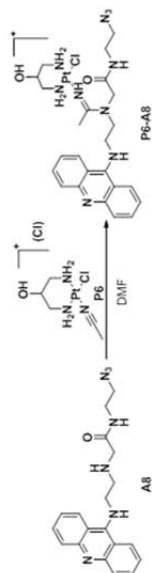

### The LC-MS Analysis Of P6-A8

#### Compound Chromatogram Report - MS

**Analysis Name:** LIB-1824-D **Instrument:** LC-MSD-Trap-SL **Print Date:** 06/08/2012 06:58:41 PM  
**Method:** SONG-L-1.M **Operator:** Administrator **Acq. Date:** 5/13/2012 12:02:35 AM  
**Sample Name:** 6-8

#### Analysis Info:

**Acquisition Parameter:**  
 Mass Range Mode: Std/Normal  
 Ion Polarity: Positive  
 Ion Source Type: ESI  
 Dry Temp (Set): 350 °C  
 Nebulizer (Set): 50.00 psi  
 Dry Gas (Set): 11.00 l/min  
 Trap Drive: 150 m/z  
 Octopole RF Amplitude: 2200 m/z  
 Capillary Exit: 5-Spectra  
 Skimmer: 2000000 µs  
 Oct 1 DC: 12.00 Volt  
 Oct 2 DC: 1.73 Volt  
 Charge Control: on

#### Compound List:

| # | RT [min] | Range [min] | Height | Area | Area Frac % |
|---|----------|-------------|--------|------|-------------|
| 1 | 9.7      | 9.6 - 9.8   | 4      | 26   | 29.1        |
| 2 | 10.4     | 10.2 - 10.6 | 9      | 63   | 70.9        |

#### Chromatograms:

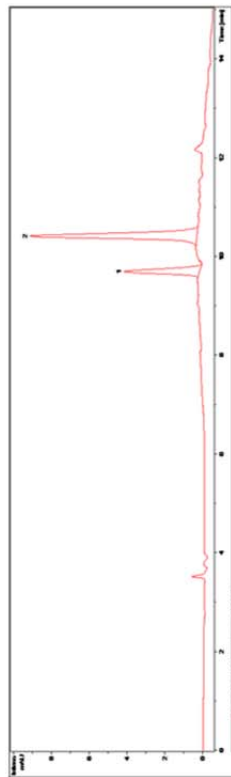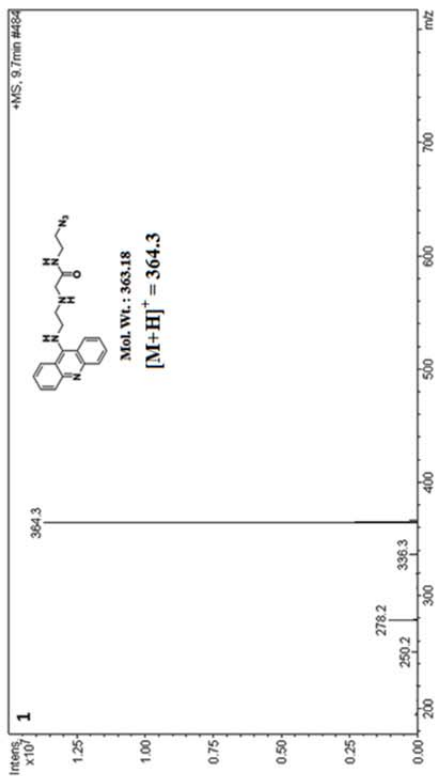

Mol. Wt.: 363.18  
 $[M+H]^+ = 364.3$

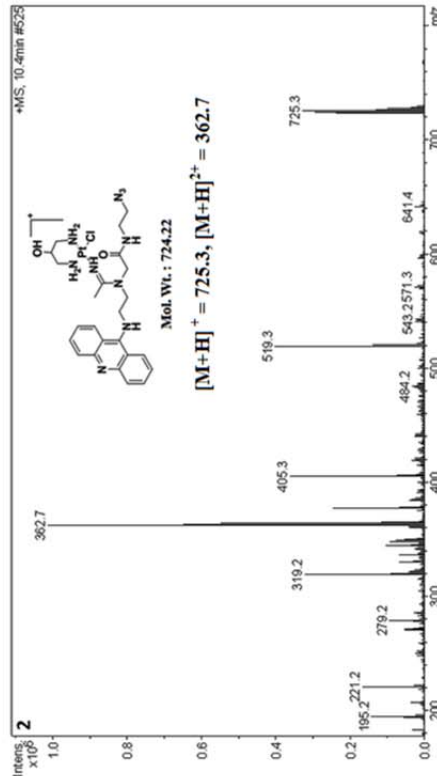

Mol. Wt.: 724.22  
 $[M+H]^+ = 725.3, [M+H]^{2+} = 362.7$

Figure S1.58. LC-ESMS analysis of reaction P6 + A8.

### The Reaction Scheme Of P6-A9

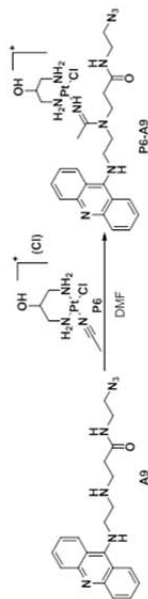

### The LC-MS Analysis Of P6-A9

### Compound Chromatogram Report - MS

**Analysis Name:** LIB91024.D **Instrument:** LC-MSD-Trip-SL **Print Date:** 06/08/2012 06:59:52 PM  
**Method:** SONG-L-1.M **Operator:** Administrator **Acq. Date:** 5/13/2012 2:36:57 PM  
**Sample Name:** 6-9  
**Analysis Info:**

#### Acquisition Parameter:

|                 |             |                       |            |                |           |
|-----------------|-------------|-----------------------|------------|----------------|-----------|
| Mass Range Mode | Std/Normal  | Trap Drive            | 52.5       | Scan Begin     | 150 m/z   |
| Ion Polarity    | Positive    | Octopole RF Amplitude | 200.0 Vpp  | Scan End       | 2200 m/z  |
| Ion Source Type | ESI         | Capillary Exit        | 135.7 Volt | Averages       | 5 Spectra |
| Dry Temp (Set)  | 350 °C      | Skimmer               | 40.0 Volt  | Max. Accu Time | 200000 µs |
| Nebulizer (Set) | 50.00 psi   | Oct 1 DC              | 12.00 Volt | ICC Target     | 30000     |
| Dry Gas (Set)   | 11.00 l/min | Oct 2 DC              | 1.73 Volt  | Charge Control | on        |

#### Compound List:

| # | RT [min] | Range [min] | Height | Area | Area Frac % |
|---|----------|-------------|--------|------|-------------|
| 1 | 9.5      | 9.4 - 9.7   | 4      | 24   | 18.9        |
| 2 | 10.1     | 10.0 - 10.4 | 15     | 101  | 81.1        |

#### Chromatograms:

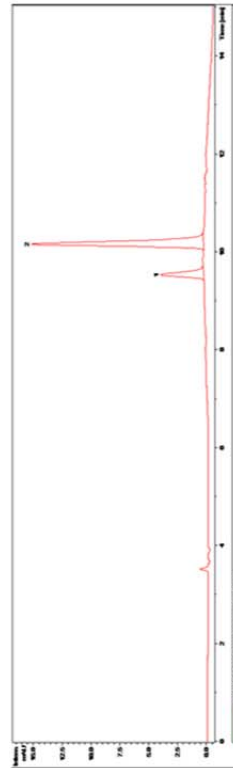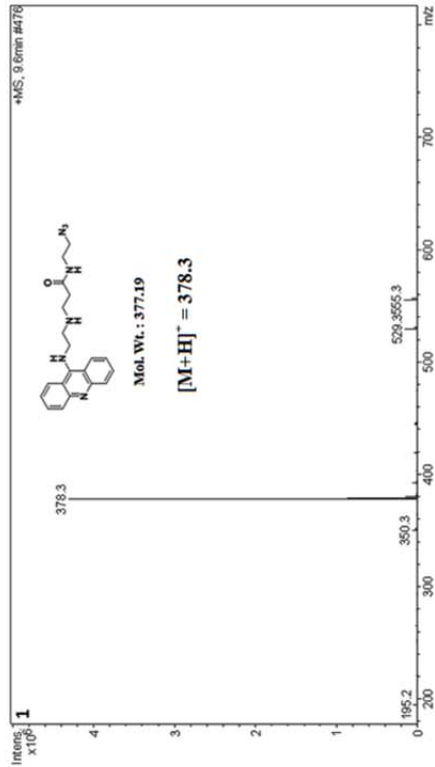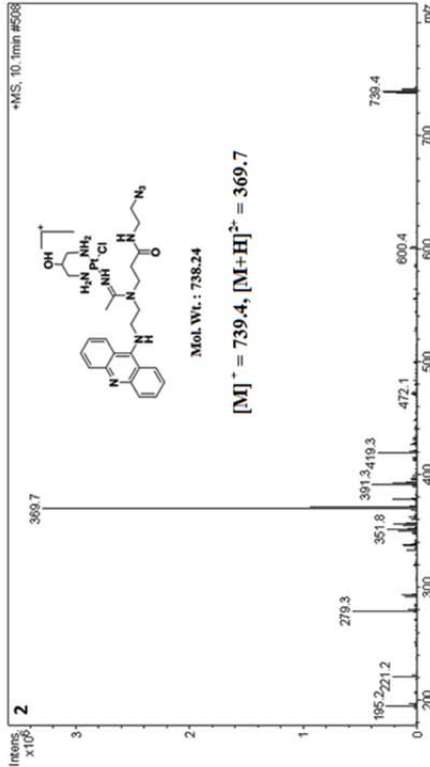

Figure S1.59. LC-ESMS analysis of reaction P6 + A9.

### The Reaction Scheme Of P6-A10

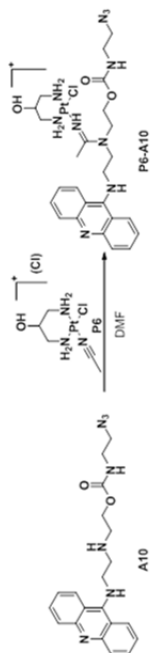

### The LC-MS Analysis Of P6-A10

#### Compound Chromatogram Report - MS

Analysis Name: LIB91030.D Instrument: LC-MSD-Trip-SL Print Date: 06/08/2012 07:00:58 PM  
 Method: SONG-L-1.M Operator: Administrator Acq. Date: 5/13/2012 4:49:34 PM  
 Sample Name: 6-10  
 Analysis Info:

Acquisition Parameter:

|                 |             |                       |           |
|-----------------|-------------|-----------------------|-----------|
| Mass Range Mode | Std/Normal  | Trap Drive            | 150 m/z   |
| Ion Polarity    | Positive    | Octopole RF Amplitude | 2200 m/z  |
| Ion Source Type | ESI         | Capillary Exit        | 5 Spectra |
| Dry Temp (Set)  | 350 °C      | Skimmer               | 200000 µs |
| Nebulizer (Set) | 50.00 psi   | Oct 1 DC              | 30000     |
| Dry Gas (Set)   | 11.00 l/min | Oct 2 DC              | on        |

#### Compound List:

| # | RT [min] | Range [min] | Height | Area | Area Frac % |
|---|----------|-------------|--------|------|-------------|
| 1 | 9.6      | 9.4 - 9.7   | 3      | 18   | 17.9        |
| 2 | 10.2     | 10.1 - 10.5 | 12     | 80   | 82.1        |

#### Chromatograms:

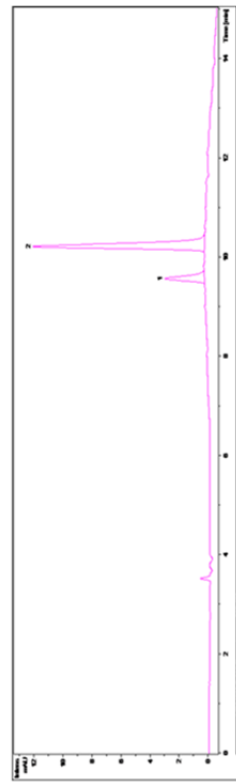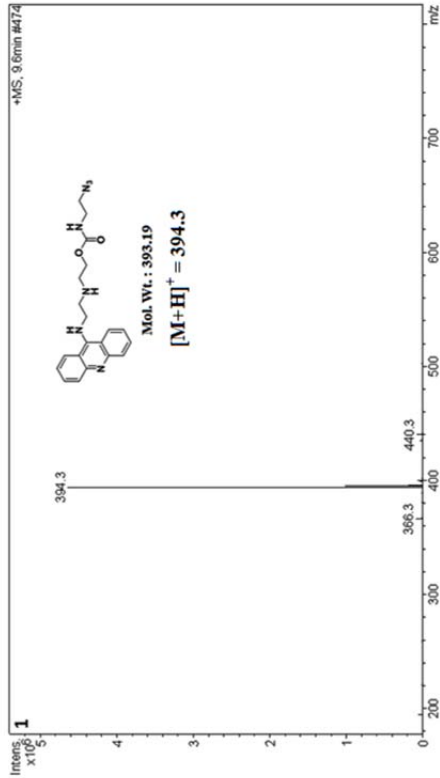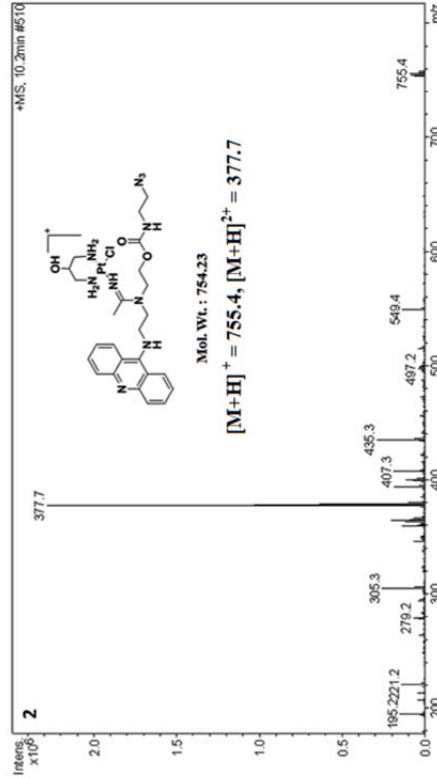

Figure S1.60. LC-ESMS analysis of reaction P6 + A10.



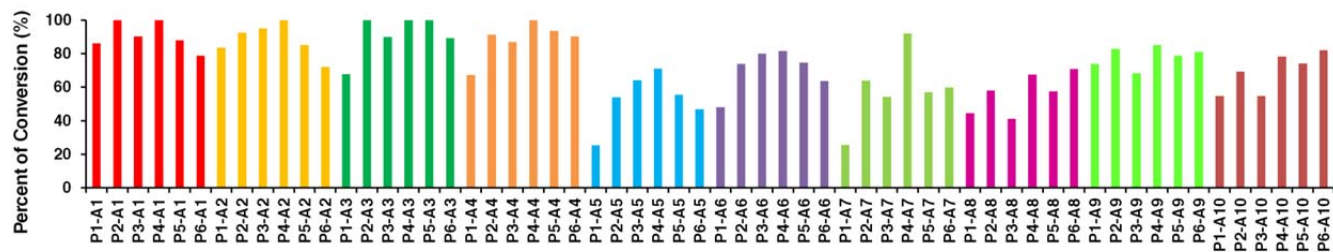

**Figure S1.61.** Percent conversion in ‘click’ reactions for platinum-acridines. Compounds are sorted and color-coded by common acridine moieties.

### 3. NMR spectra for purified compounds

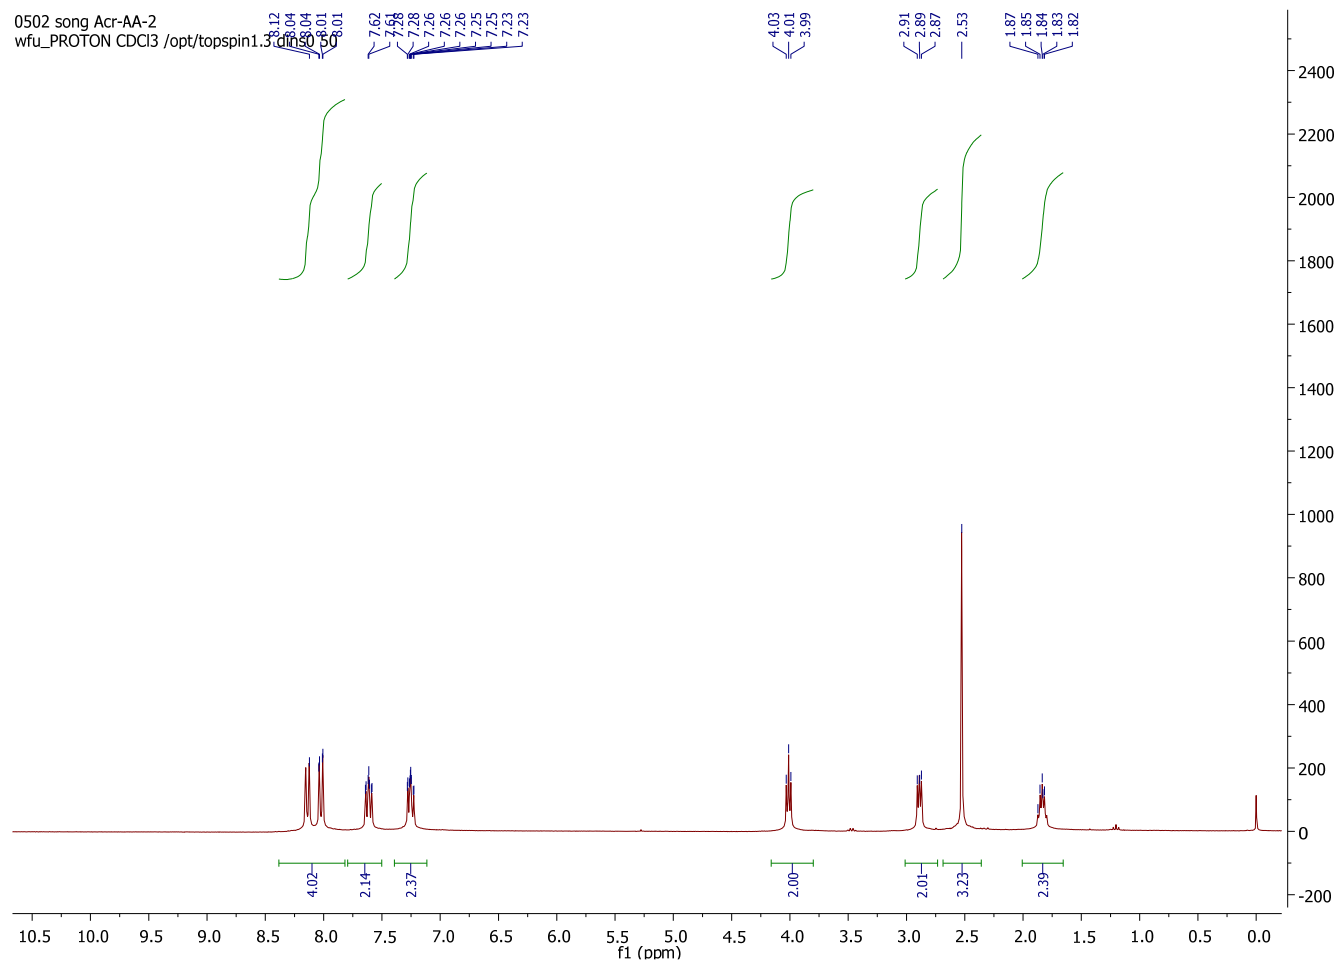

Figure S2.1.  $^1\text{H}$  NMR spectrum of compound A2.

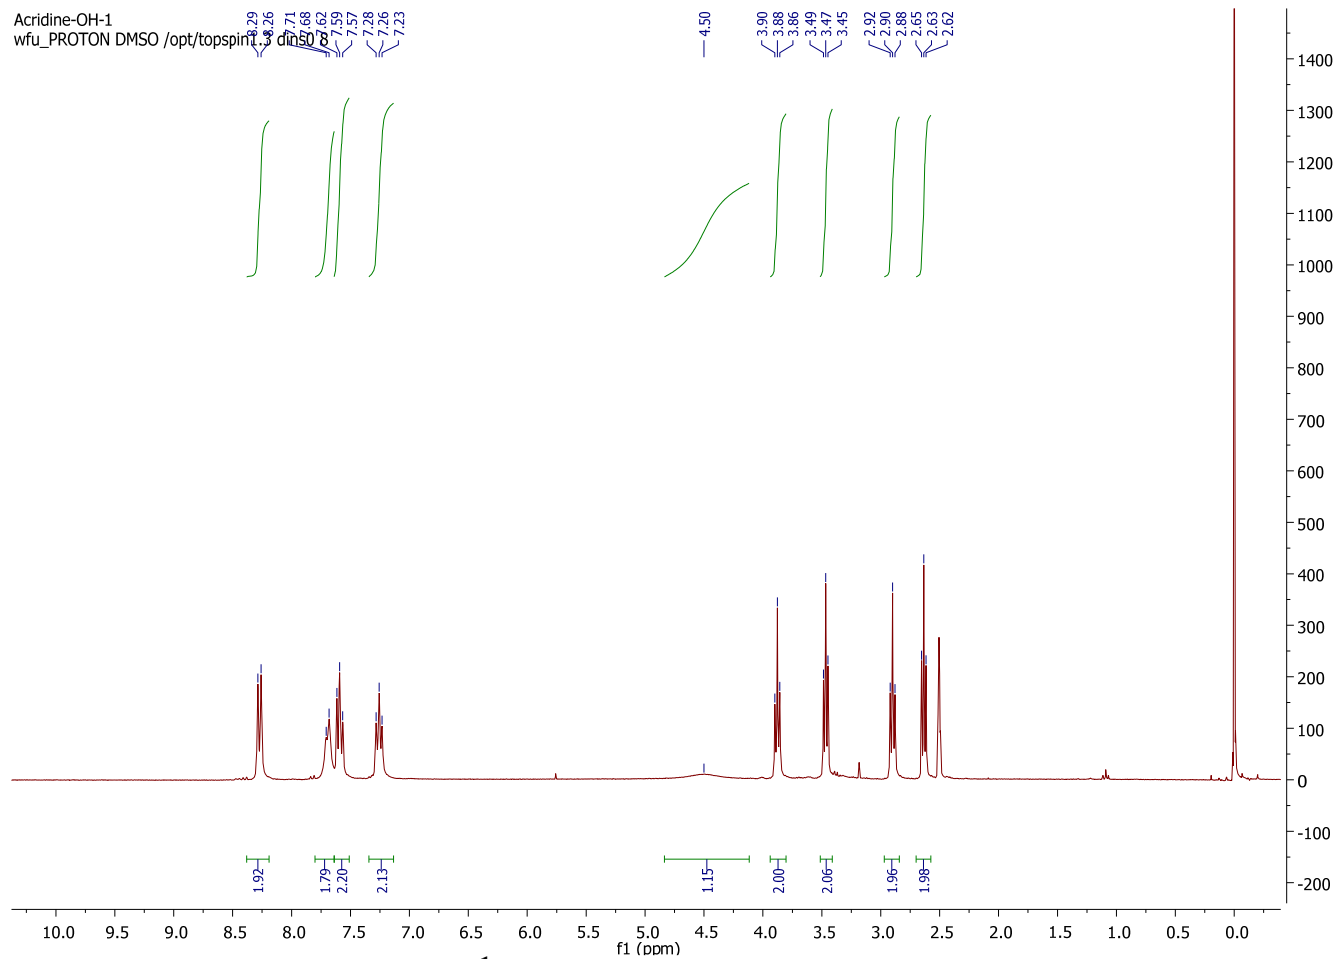

Figure S2.2.  $^1\text{H}$  NMR spectrum of compound A3.

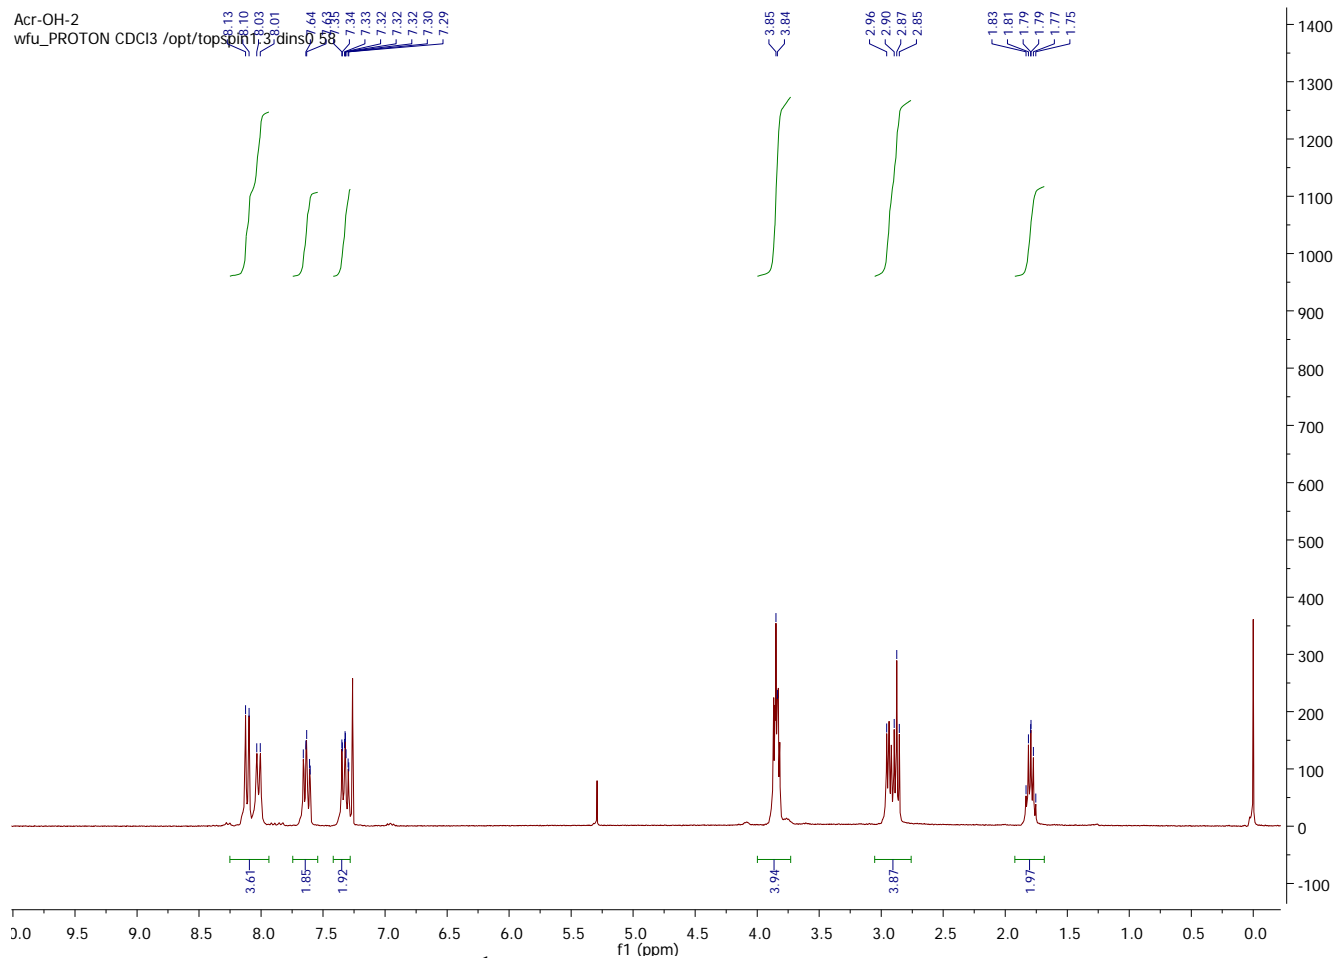

Figure S2.3.  $^1\text{H}$  NMR spectrum of compound A4.

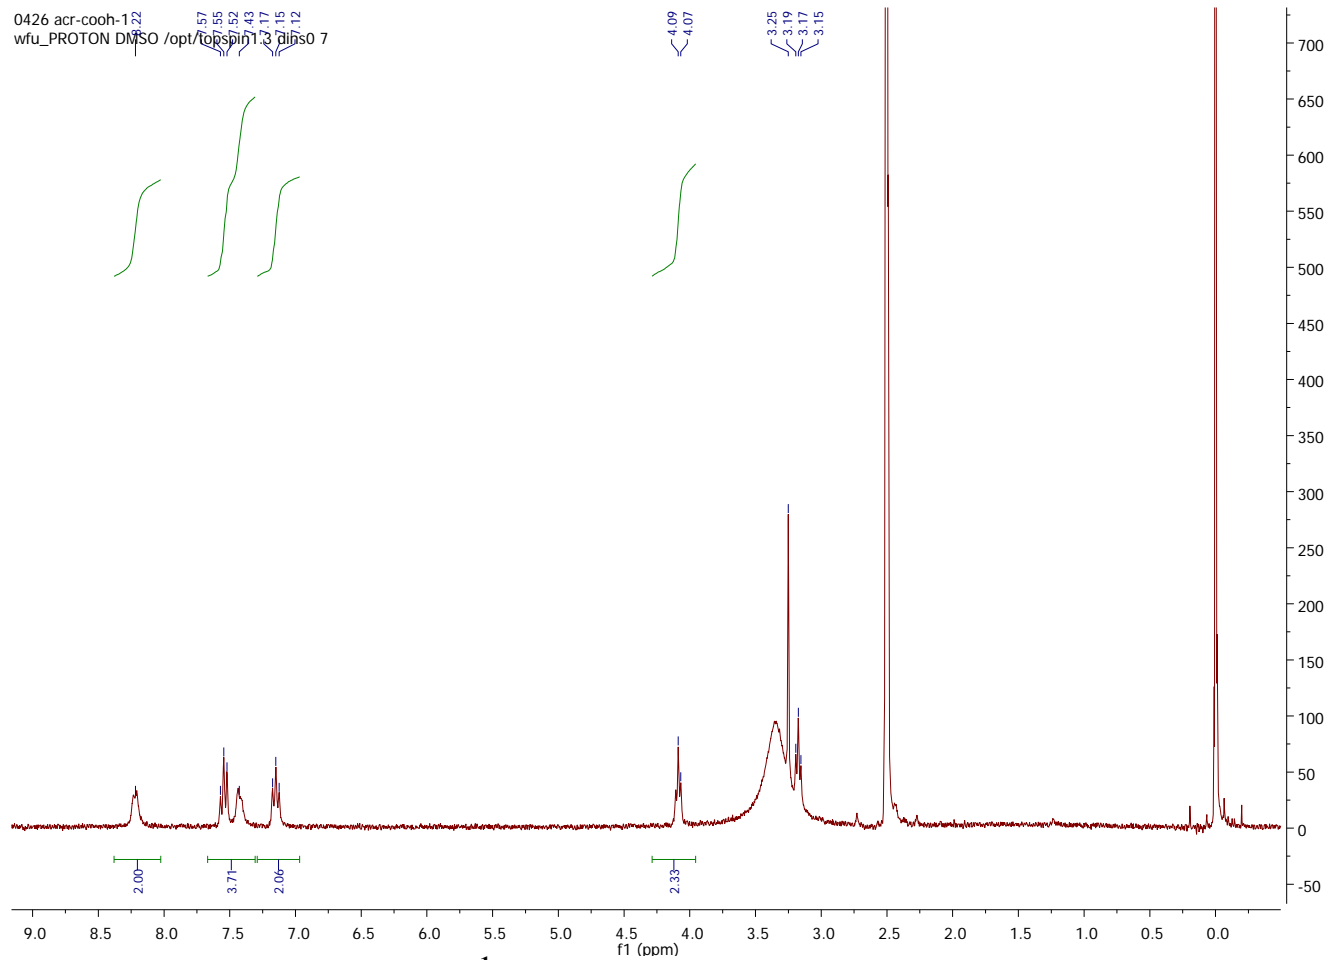

**Figure S2.4.**  $^1\text{H}$  NMR spectrum of compound A5.

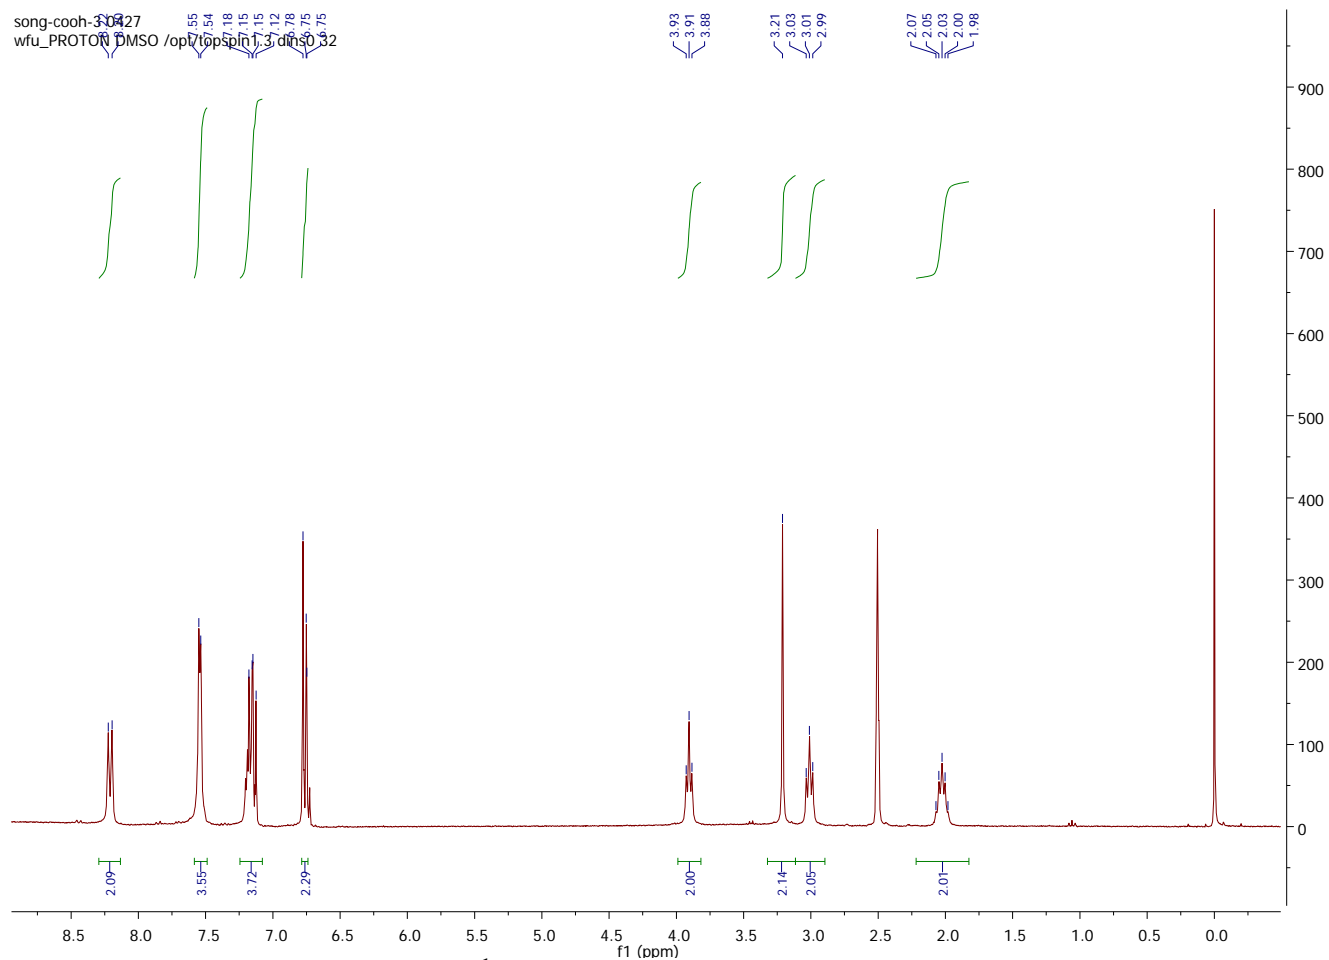

Figure S2.5.  $^1\text{H}$  NMR spectrum of compound A6.

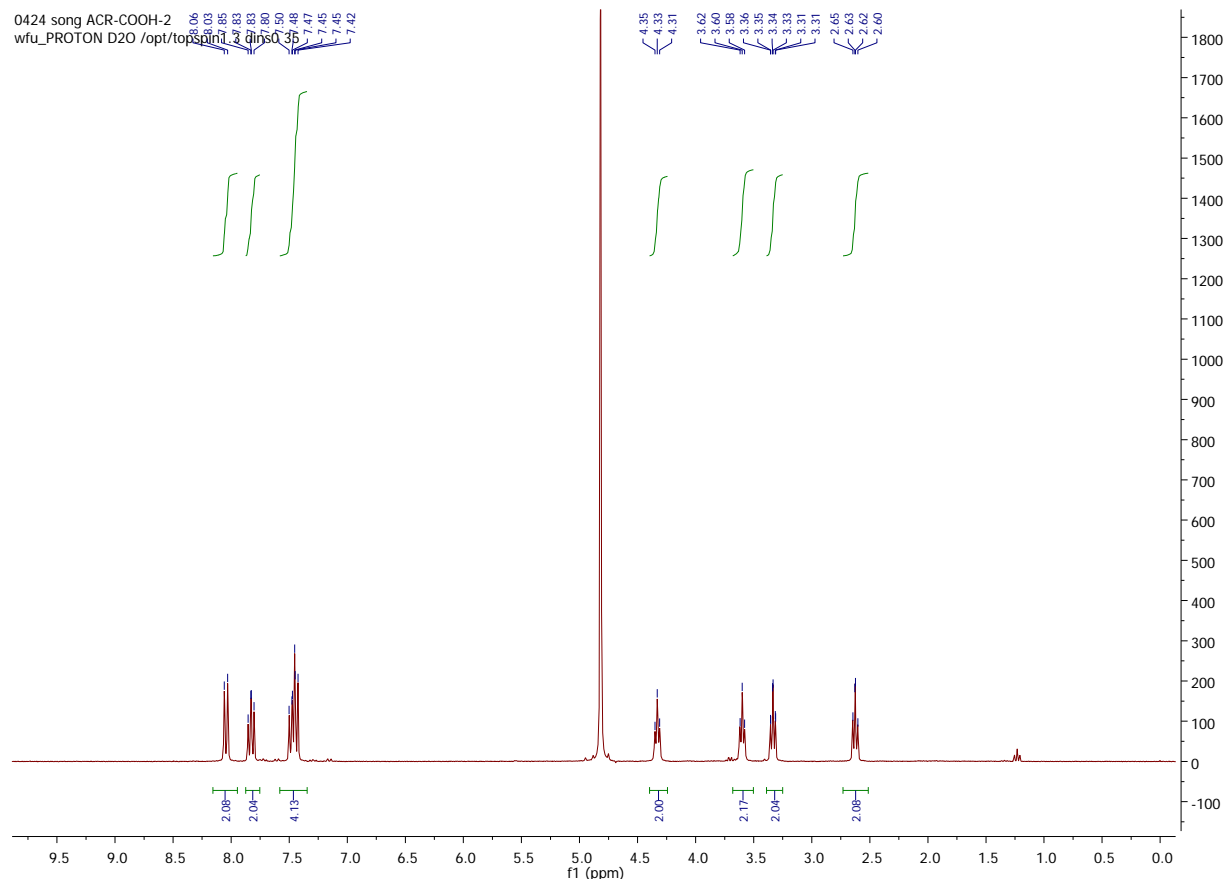

**Figure S2.6.  $^1\text{H}$  NMR spectrum of compound A7.**

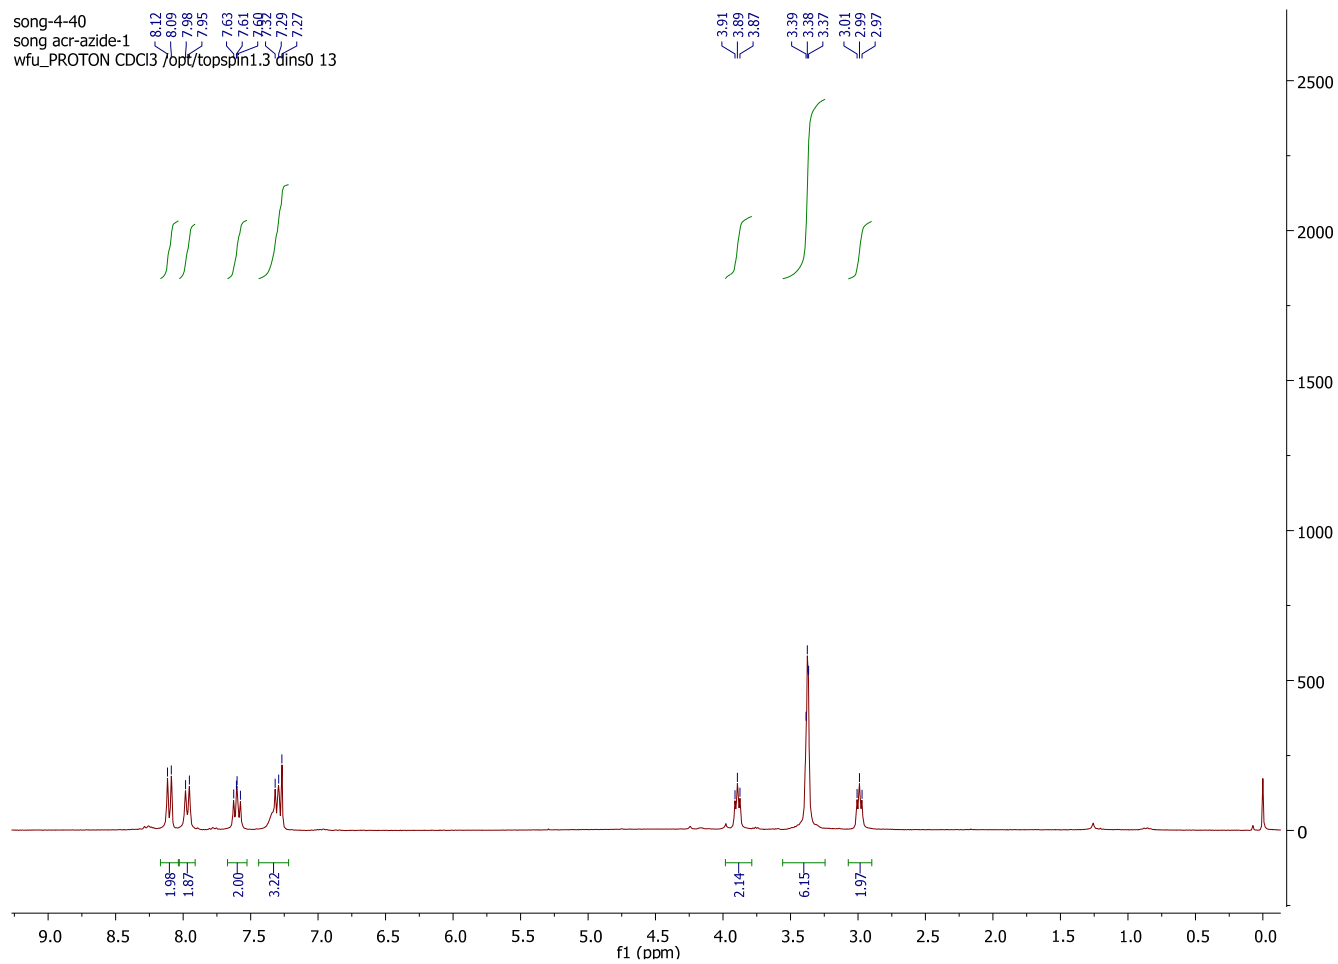

**Figure S2.7.**  $^1\text{H}$  NMR spectrum of compound A8.



0502 song Acr-Azide-2  
wfu\_PROTON CDCl3 /opt/topspin1.3

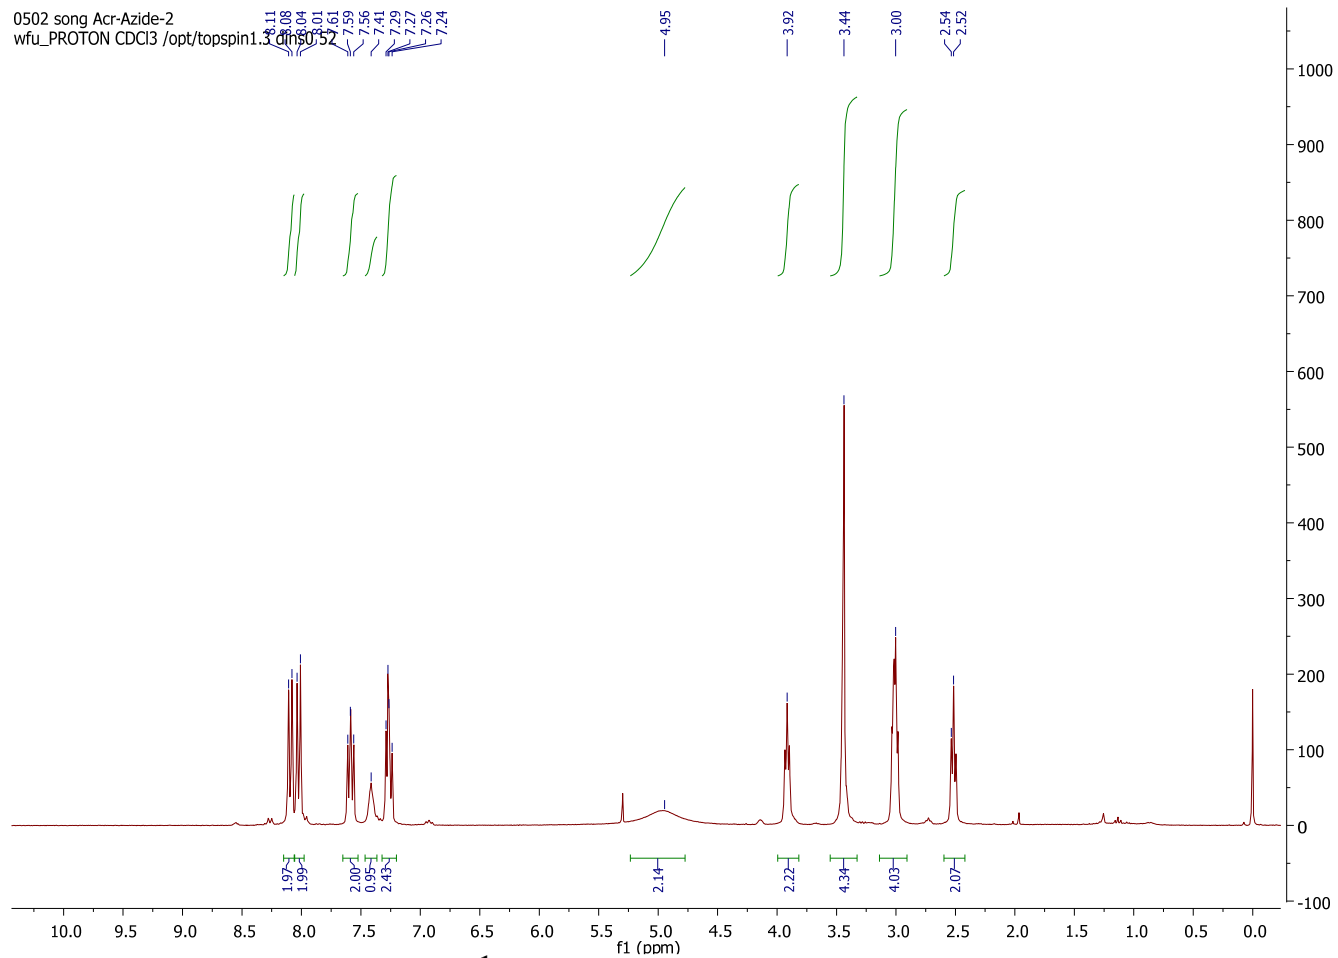

Figure S2.8. <sup>1</sup>H NMR spectrum of compound A9.

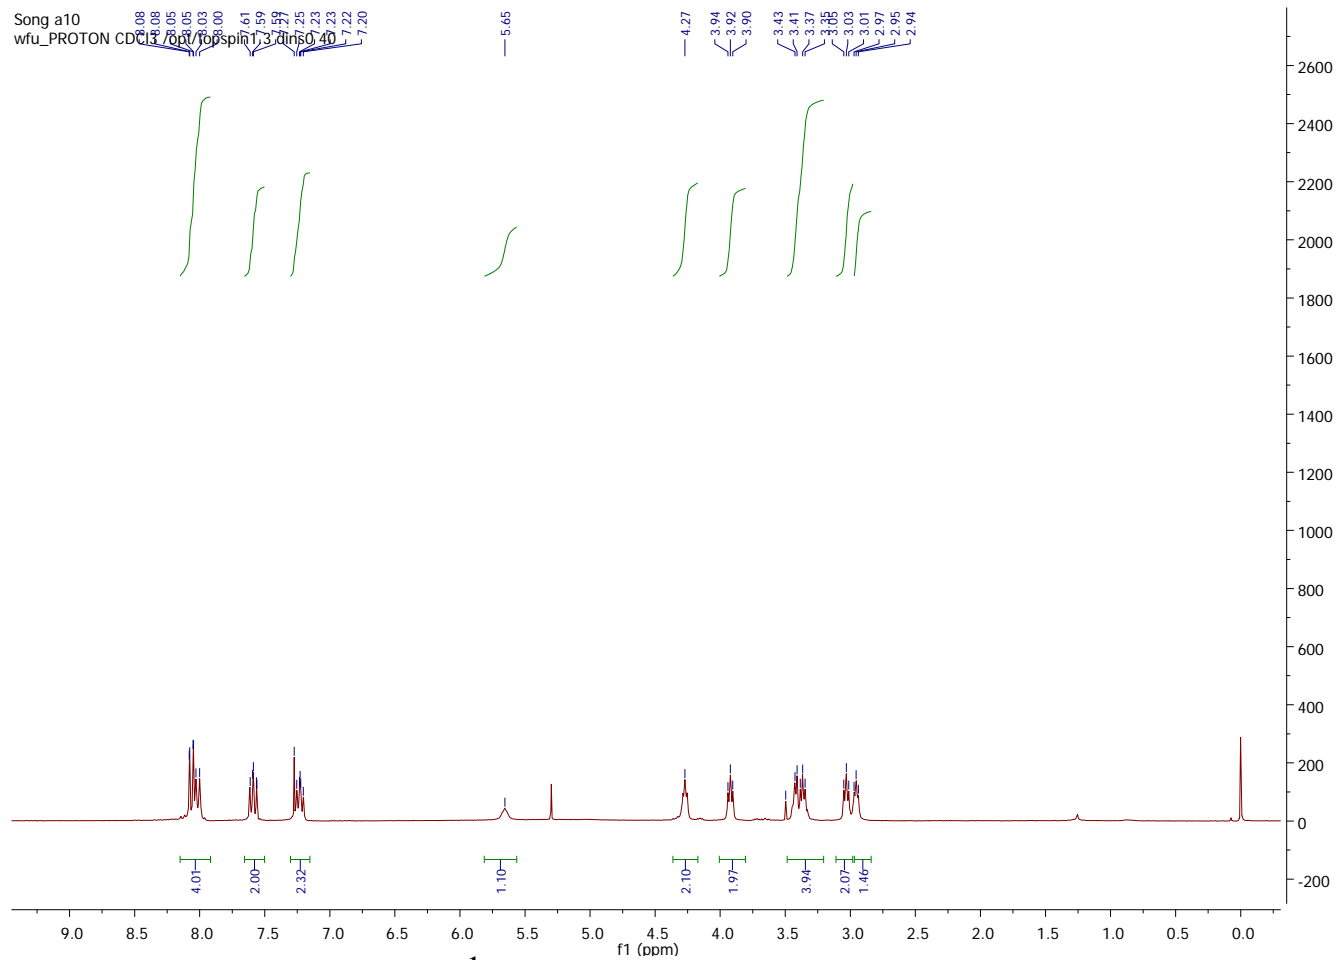

Figure S2.9. <sup>1</sup>H NMR spectrum of compound A10.

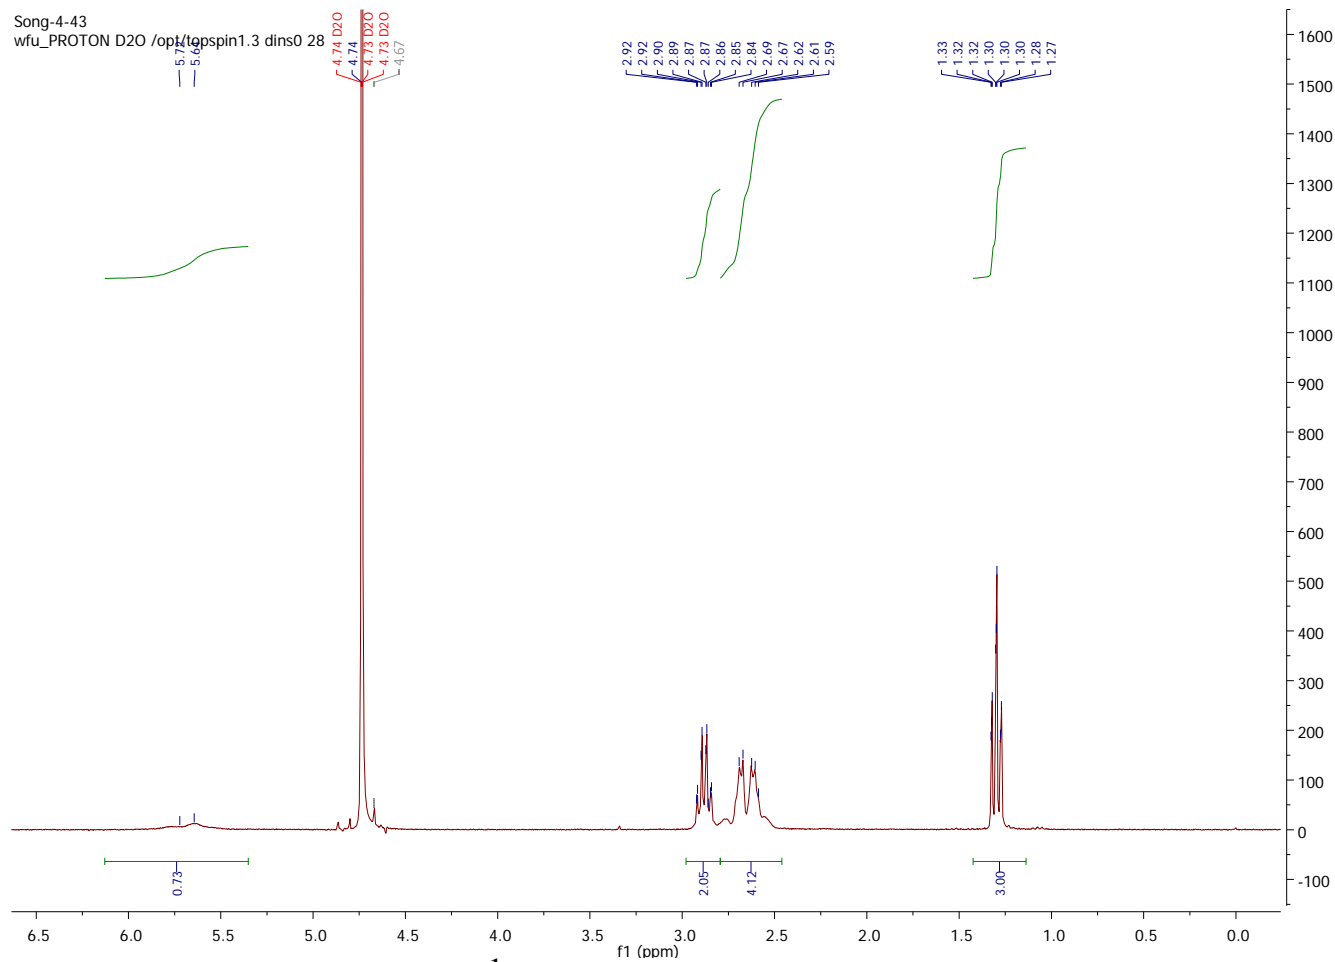

**Figure S2.10.**  $^1\text{H}$  NMR spectrum of compound P1.

050112 En-Pt-Me  
wfu\_PROTON D2O /opt/topspin1.3 d1fso 39

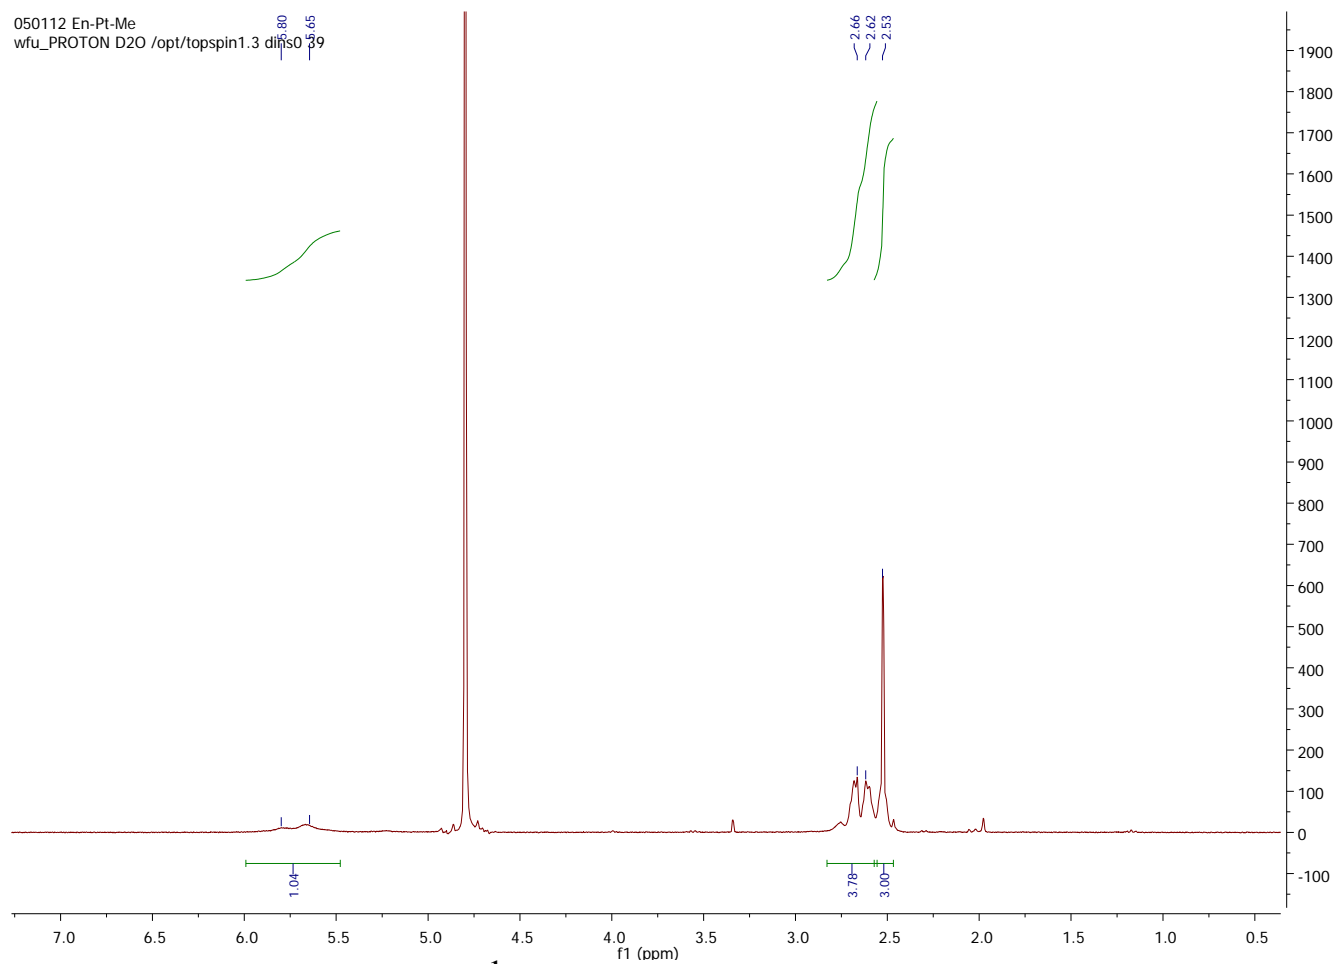

Figure S2.11. <sup>1</sup>H NMR spectrum of compound P2.

Song-4-48  
DIAMINE-Pt-Et  
wfu\_PROTON D2O /opt/topspin1.3 dins0 24

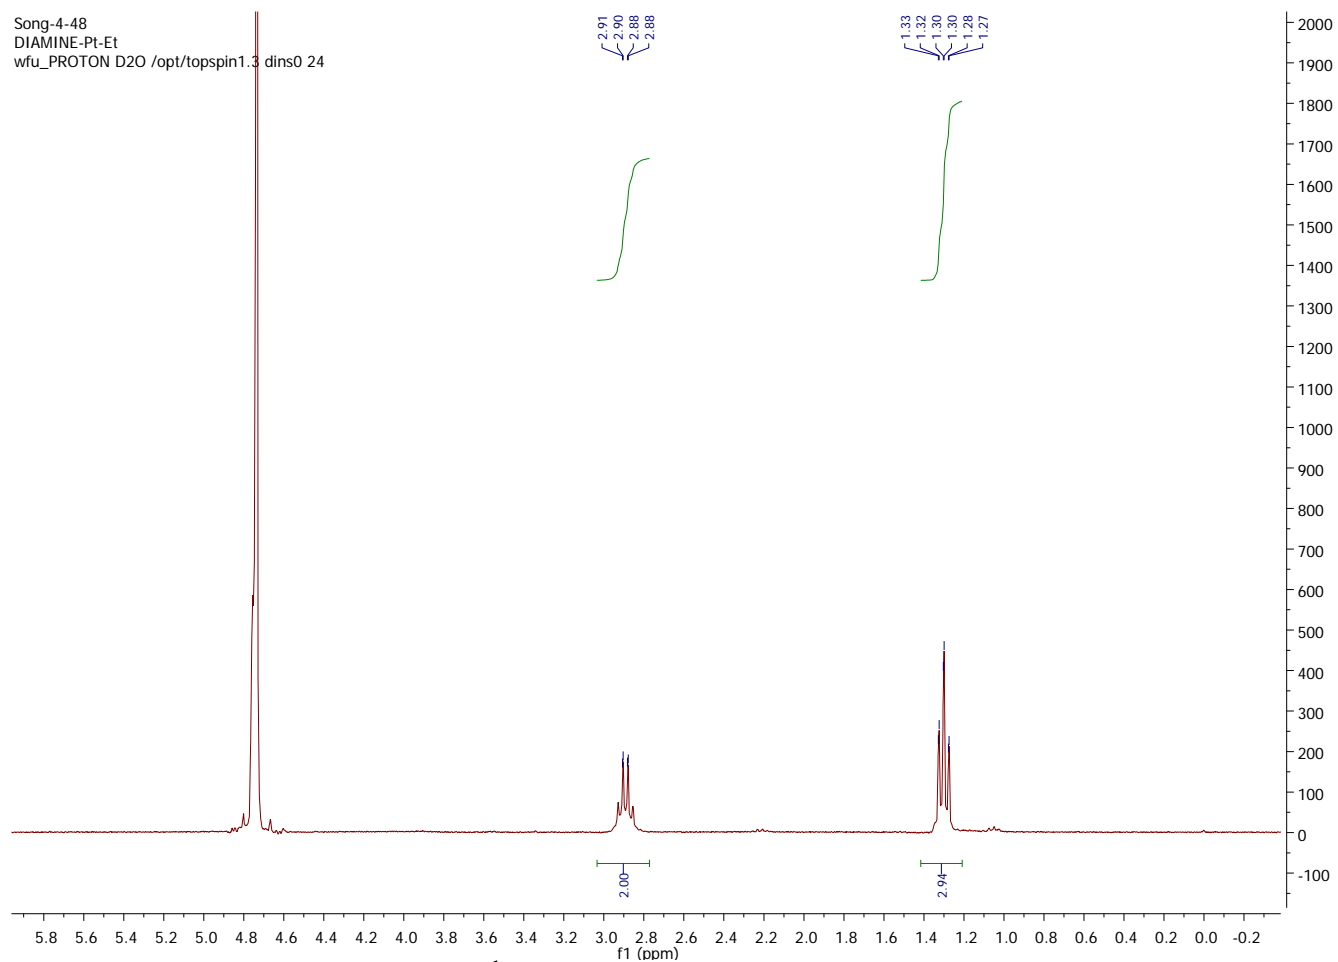

Figure S2.12.  $^1\text{H}$  NMR spectrum of compound P3.

DIAM-Pt-Me  
wfu\_PROTON D2O /opt/topspin1.3 dms0 60

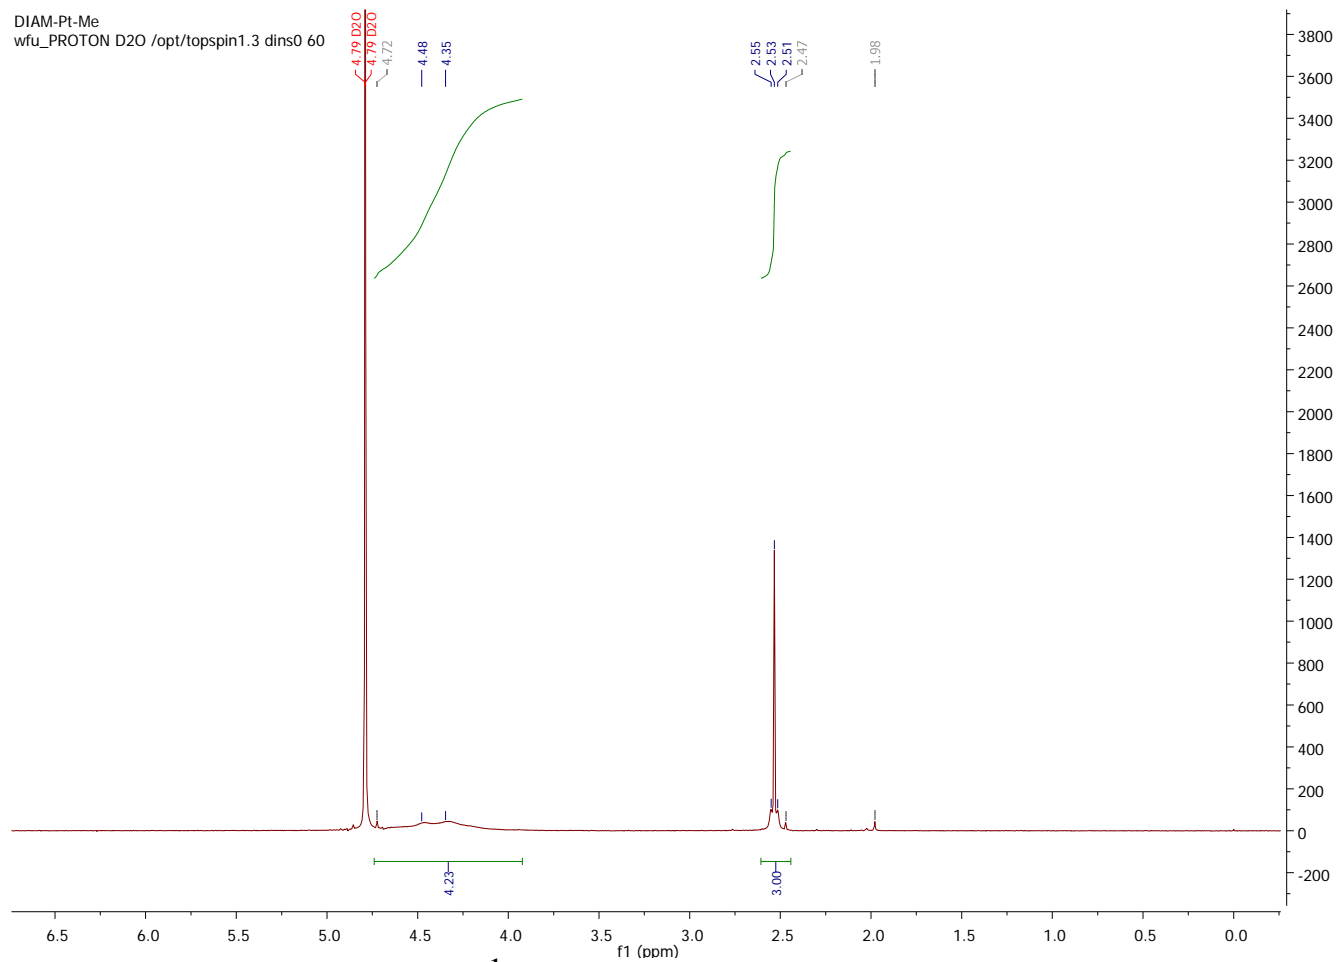

Figure S2.13. <sup>1</sup>H NMR spectrum of compound P4.

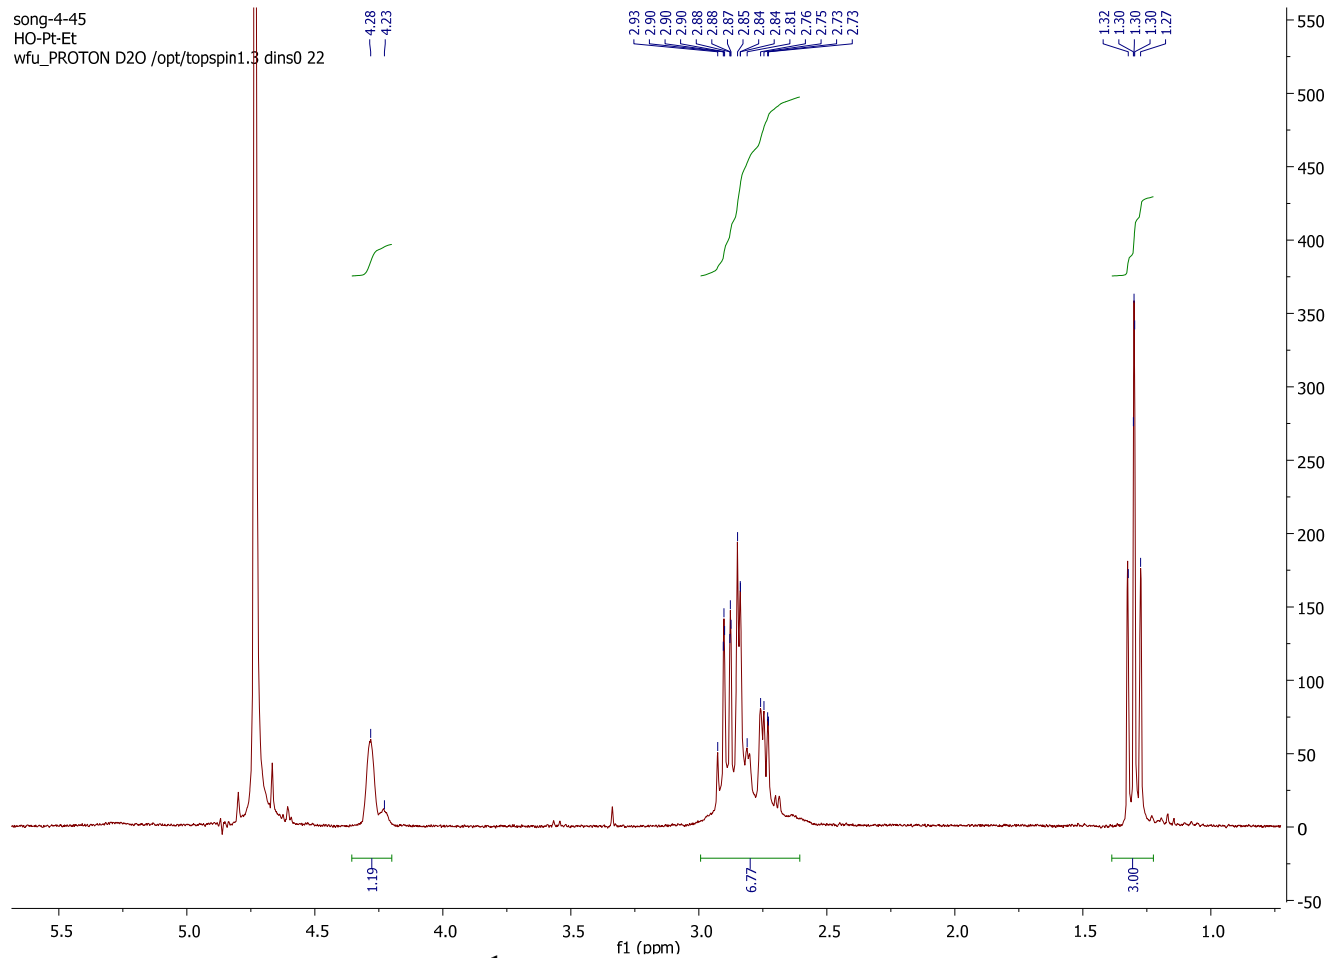

**Figure S2.14.**  $^1\text{H}$  NMR spectrum of compound P5.

0502 HO-Pt-Me  
wfu\_PROTON D2O /opt/topspin1.3 dins0 48

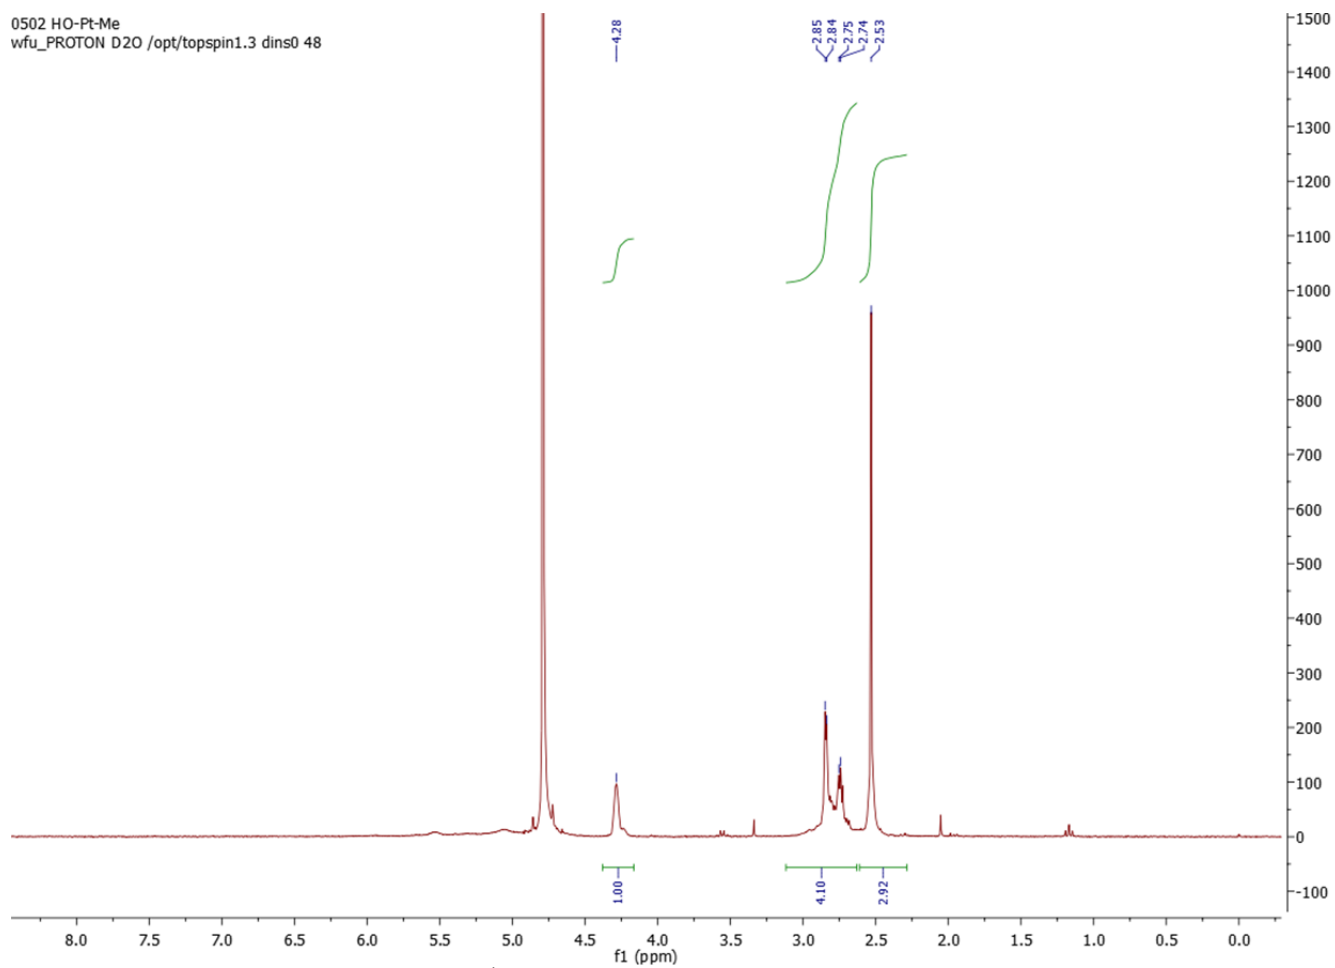

Figure S2.15.  $^1\text{H}$  NMR spectrum of compound P6.



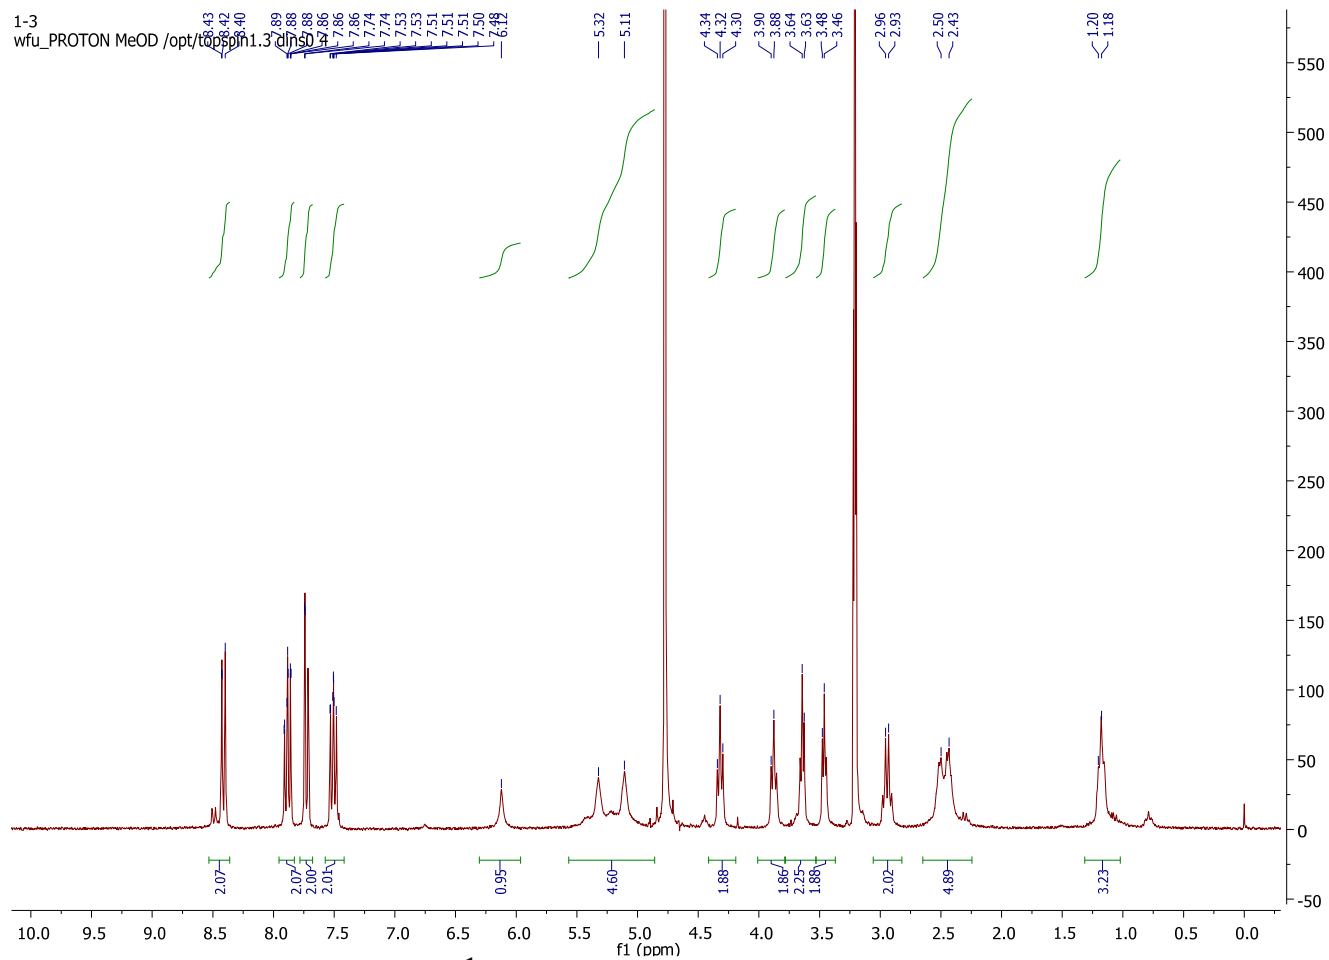

**Figure S2.16.**  $^1\text{H}$  NMR spectrum of compound P1-A3.

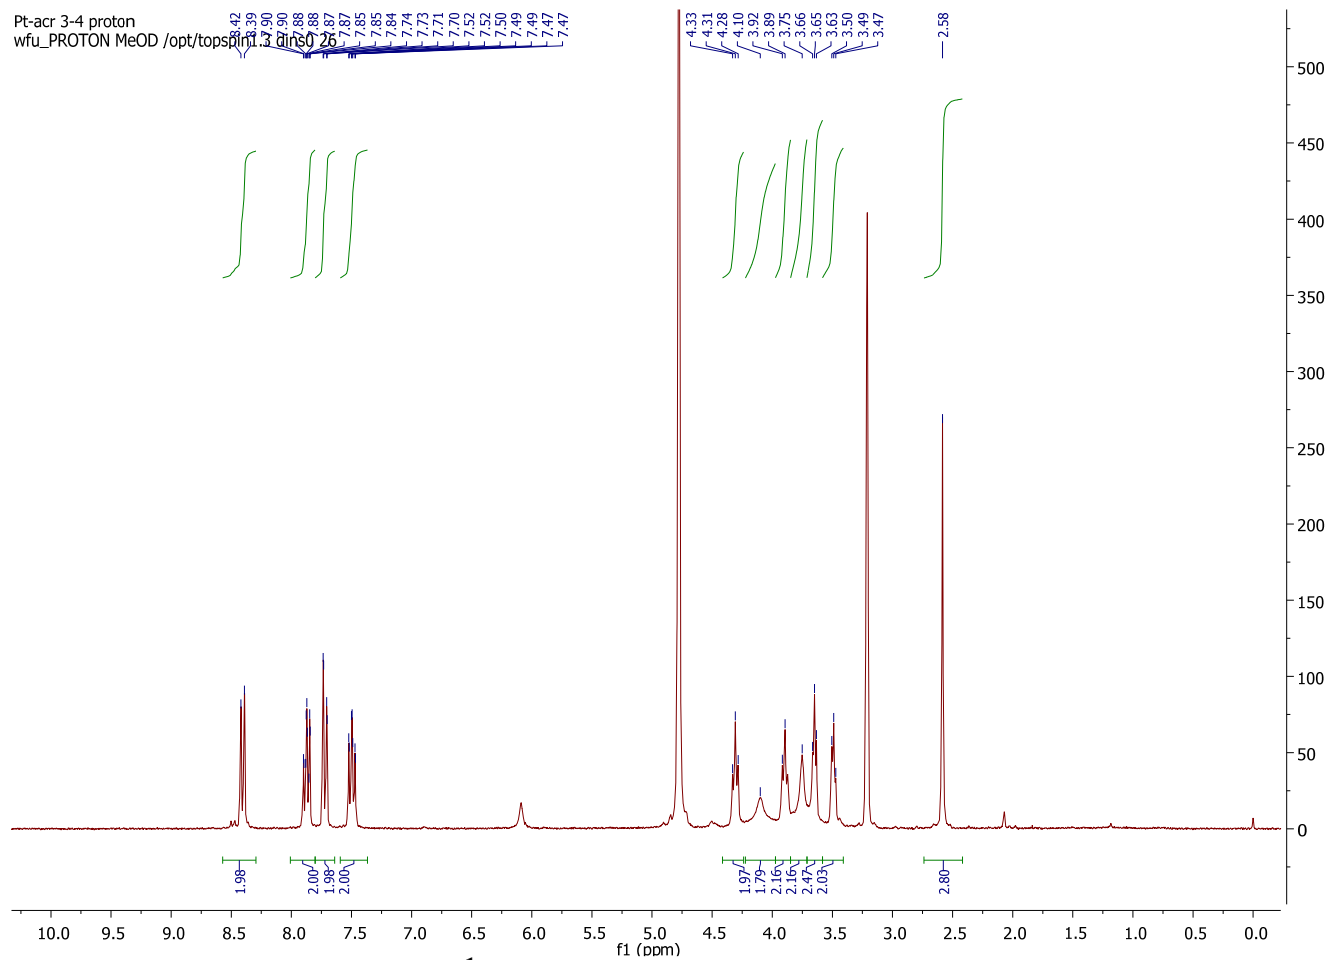

**Figure S2.17.  $^1\text{H}$  NMR spectrum of compound P4-A3.**

A-6 DMF/1  
wfu\_PROTON DMF /opt/topspin1.3 dms0 48

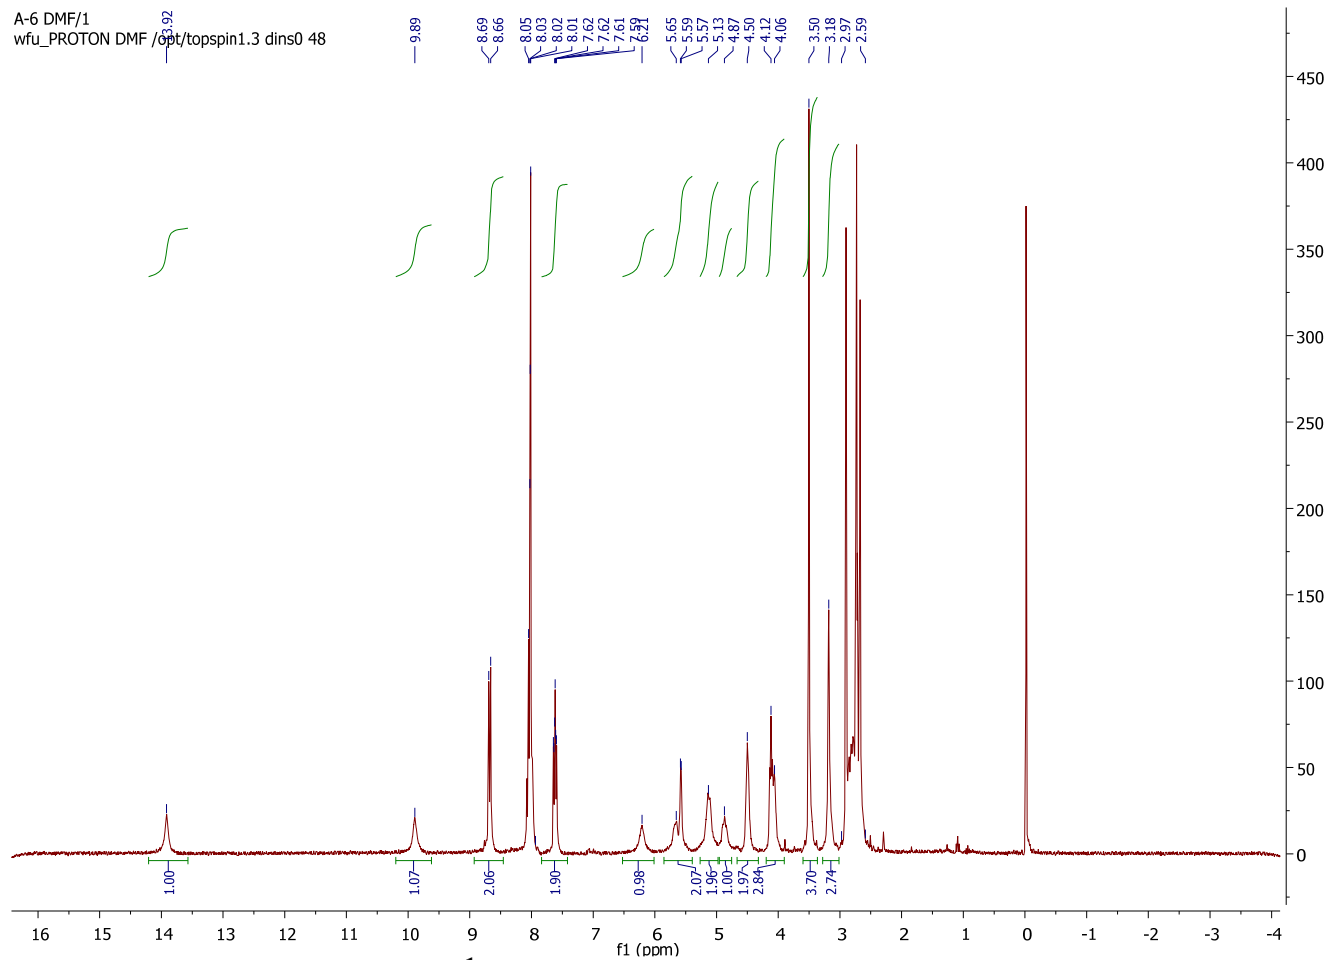

Figure S2.18.  $^1\text{H}$  NMR spectrum of compound P6-A1.

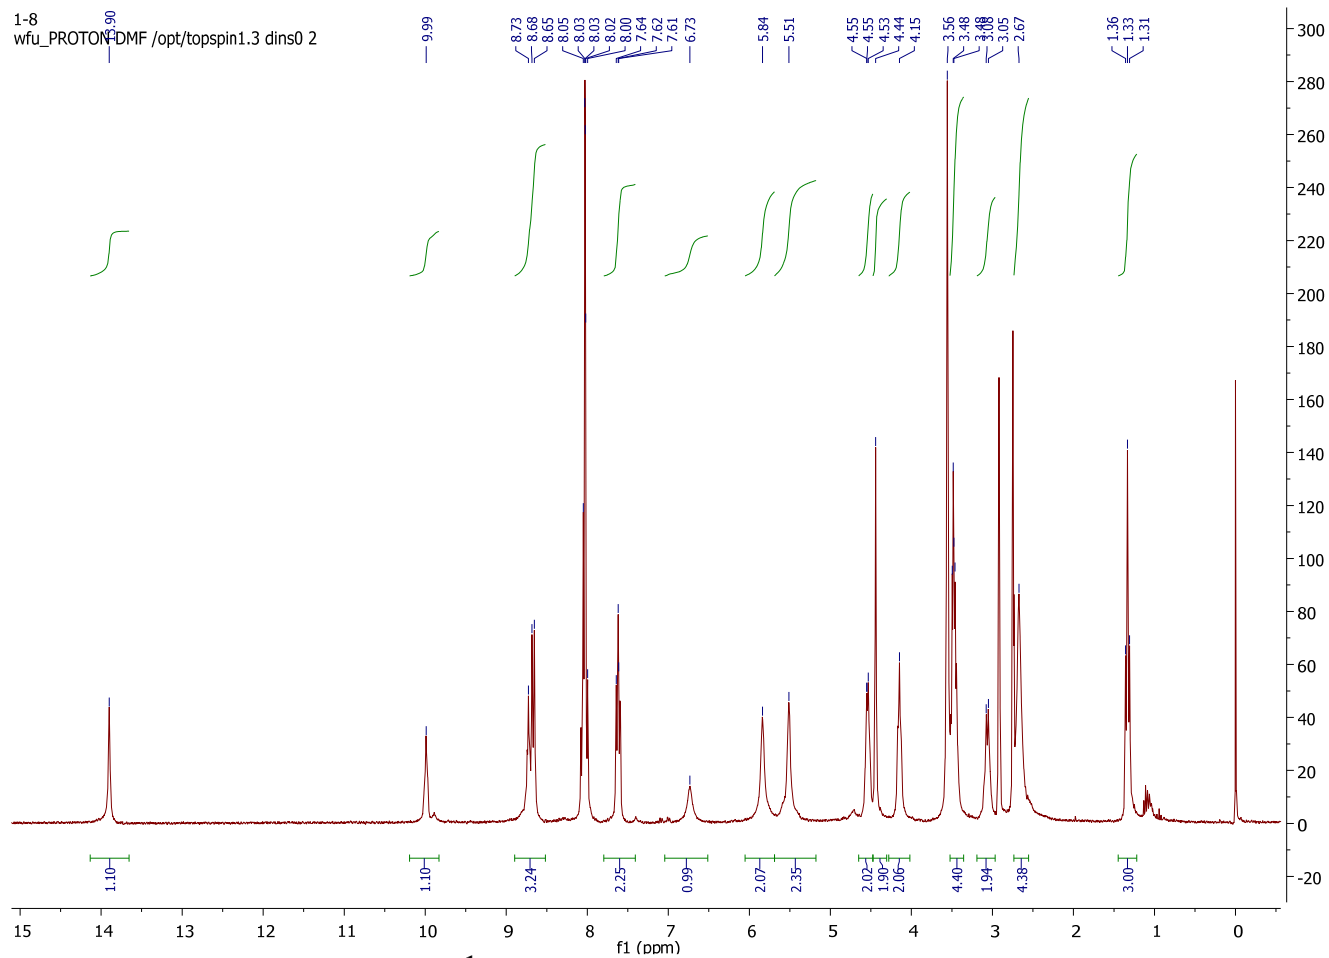

**Figure S2.19.**  $^1\text{H}$  NMR spectrum of compound P1-A8.

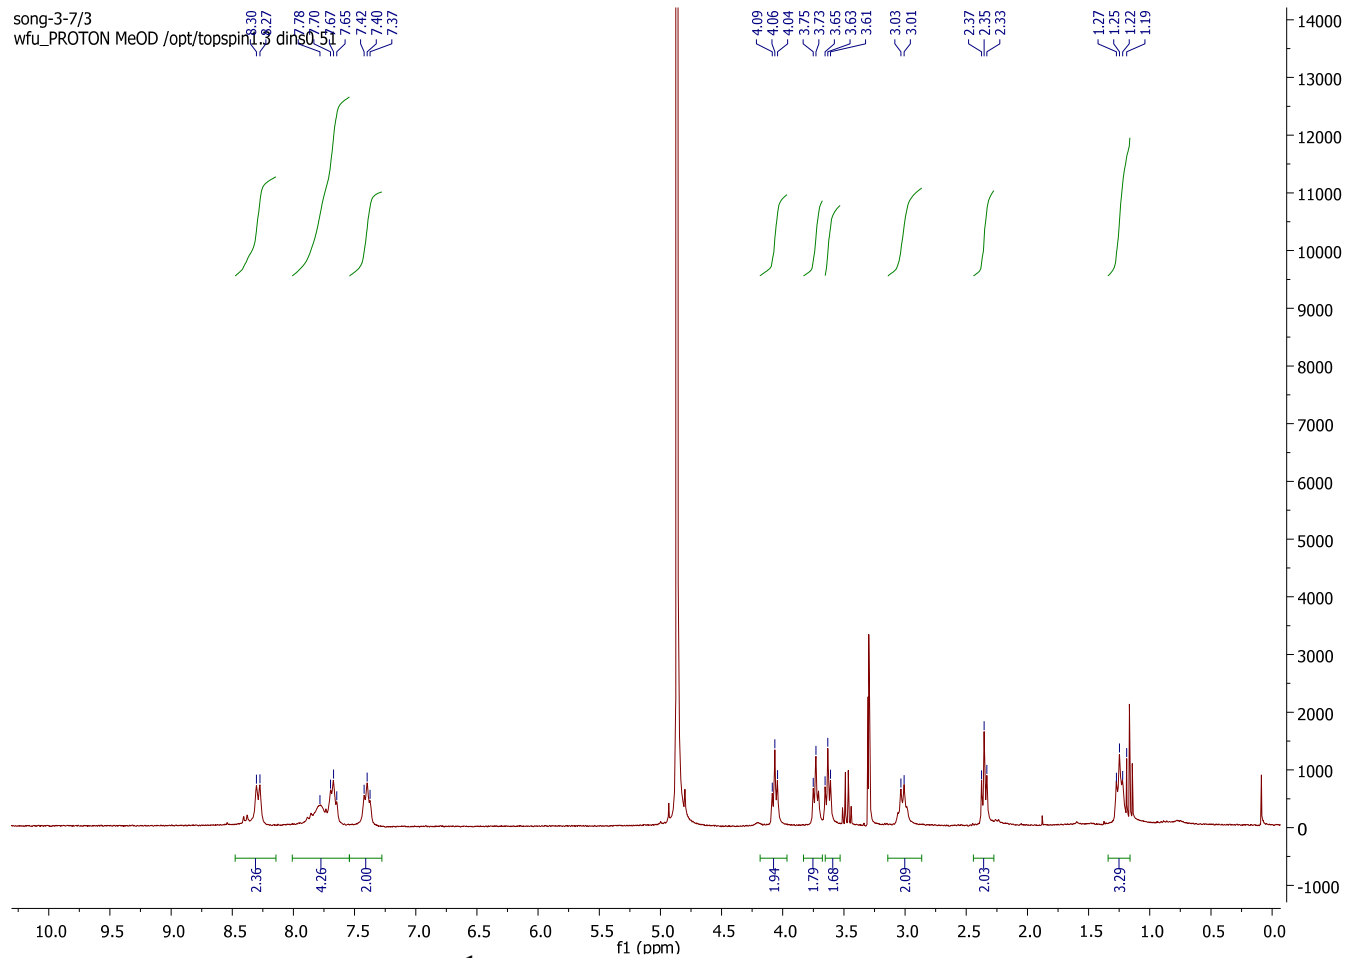

**Figure S2.20.**  $^1\text{H}$  NMR spectrum of compound P3-A7.

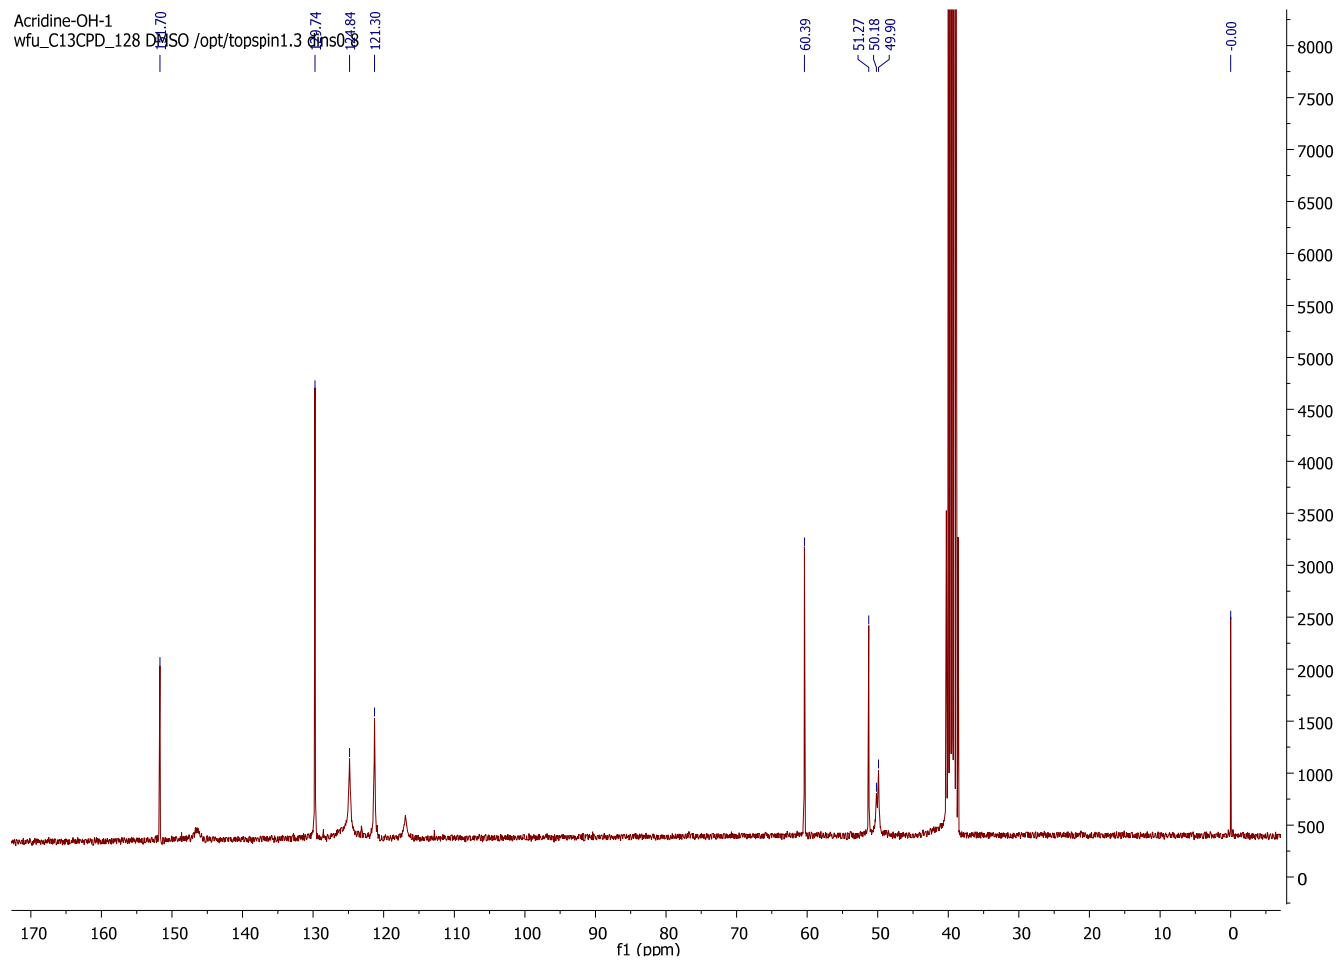

**Figure S3.1.**  $^{13}\text{C}$  NMR spectrum of compound A3.

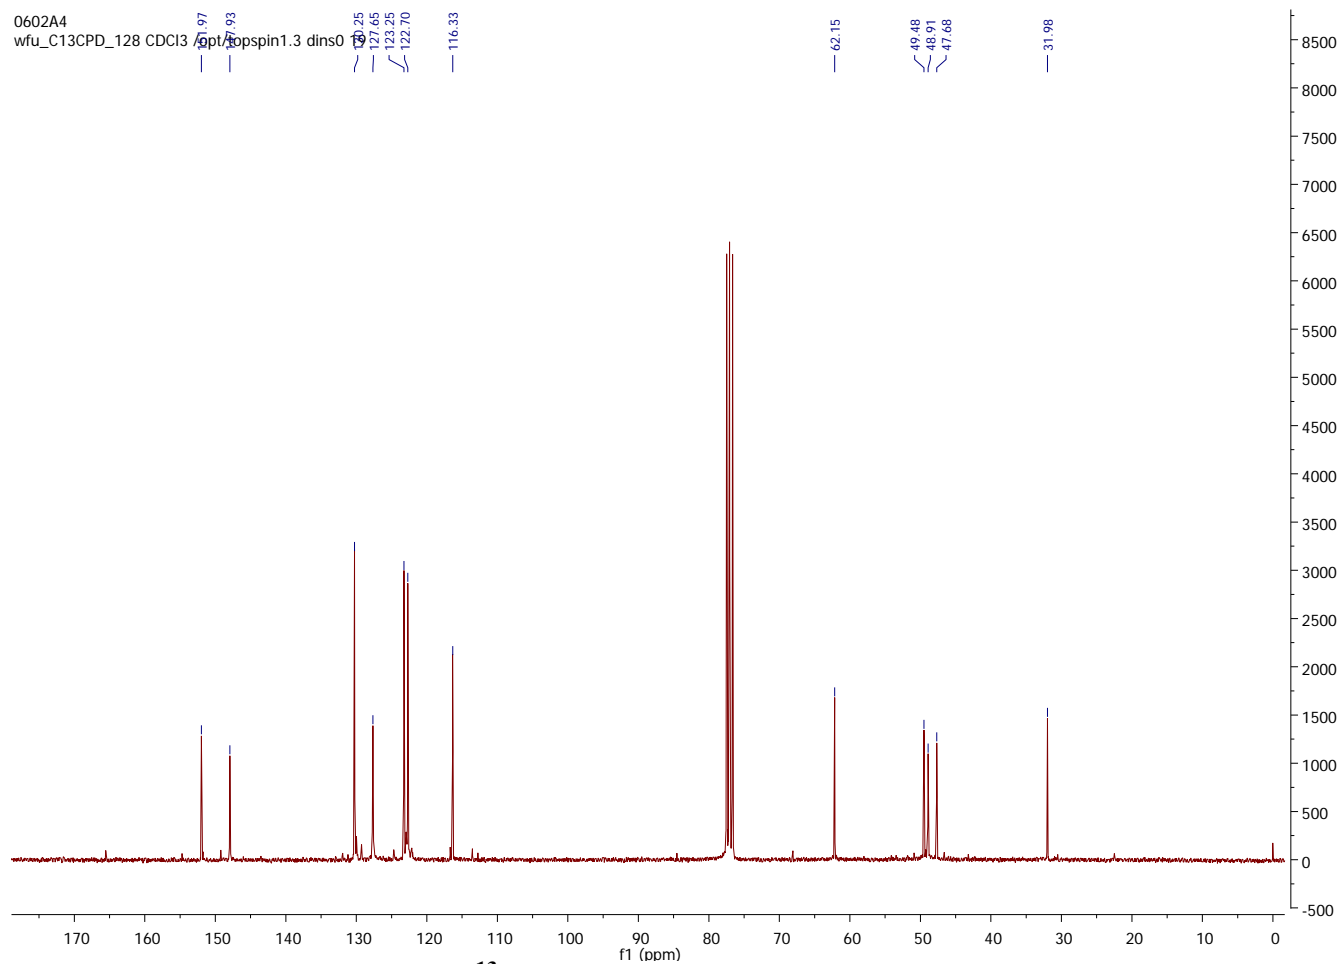

Figure S3.2.  $^{13}\text{C}$  NMR spectrum of compound A4.

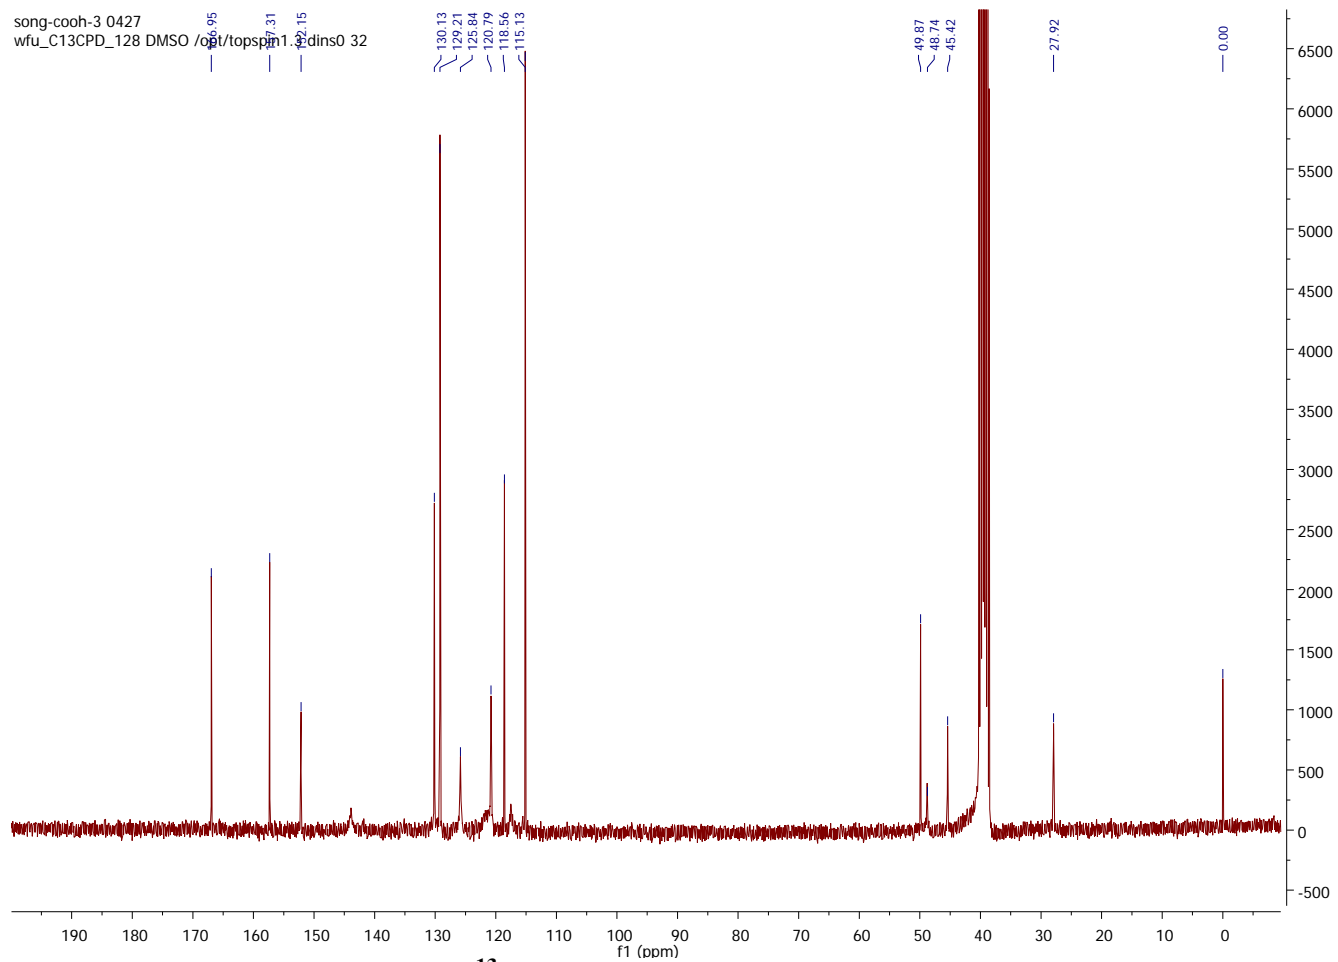

Figure S3.3.  $^{13}\text{C}$  NMR spectrum of compound A6.



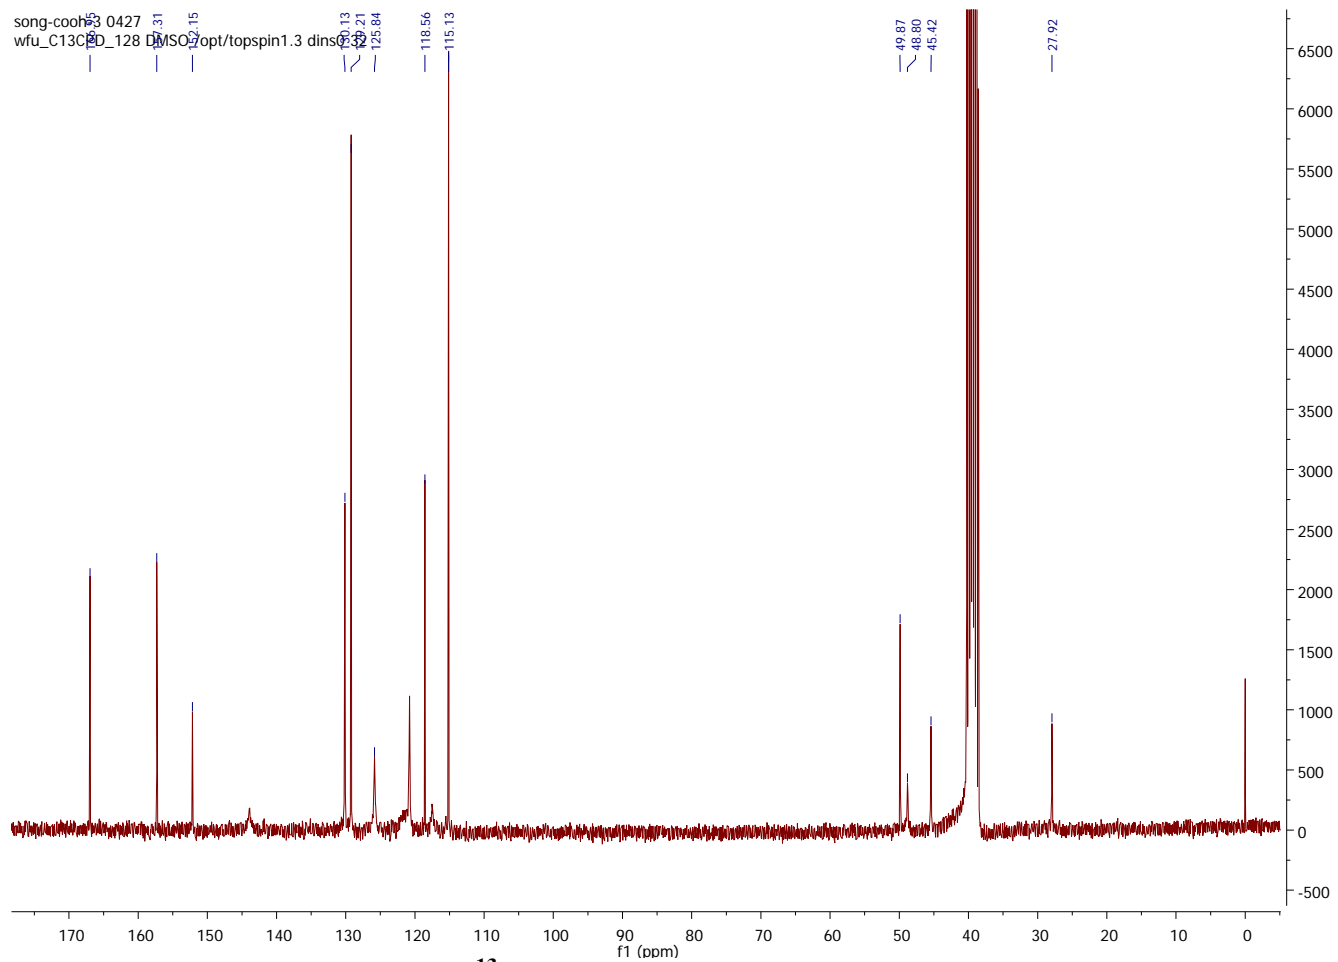

Figure S3.4.  $^{13}\text{C}$  NMR spectrum of compound A7.

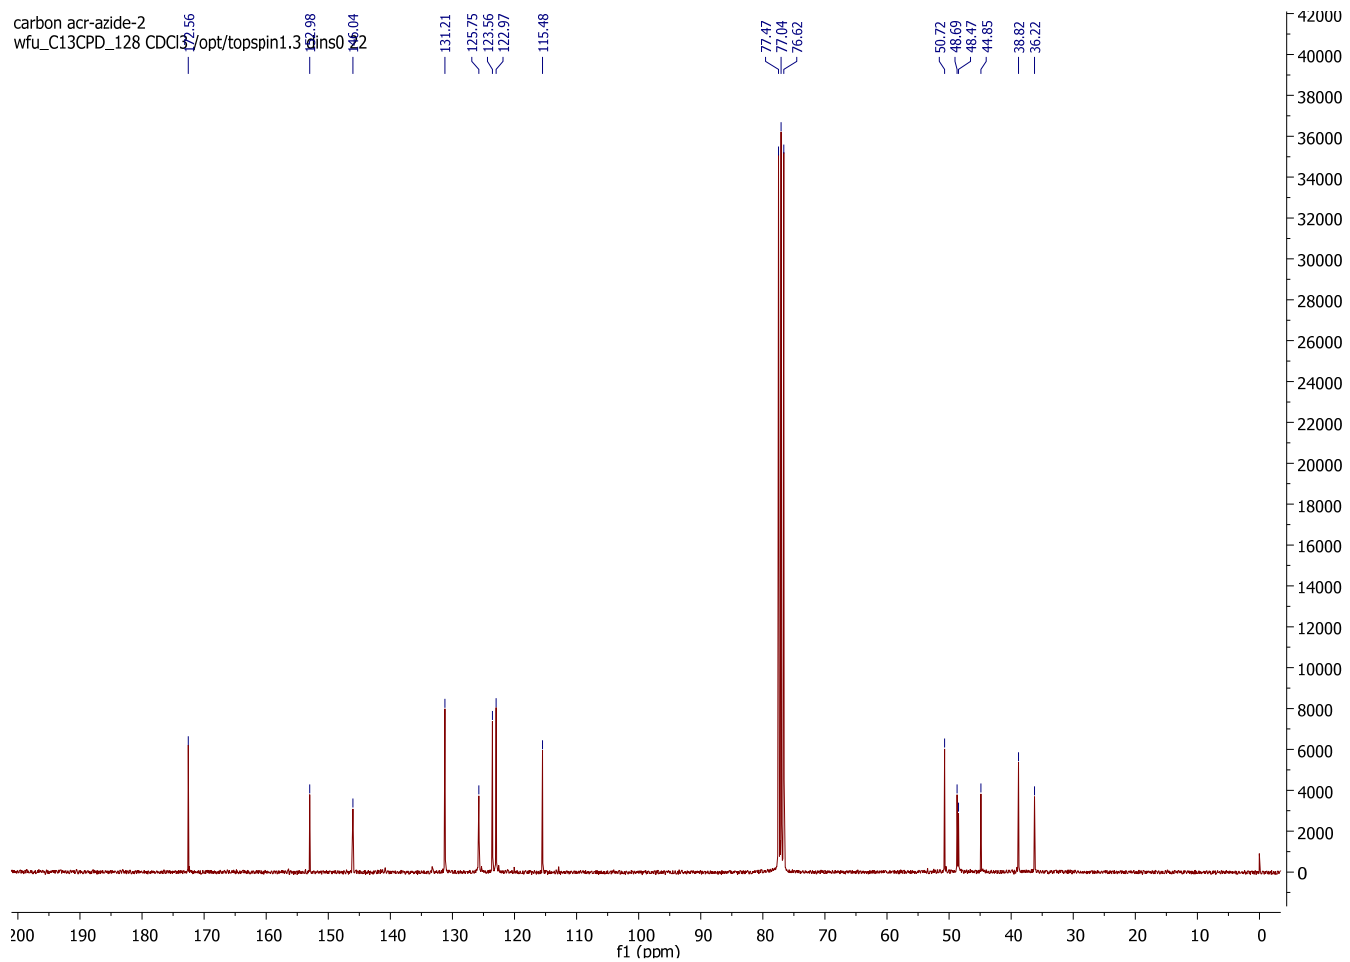

**Figure S3.5.**  $^{13}\text{C}$  NMR spectrum of compound A8.

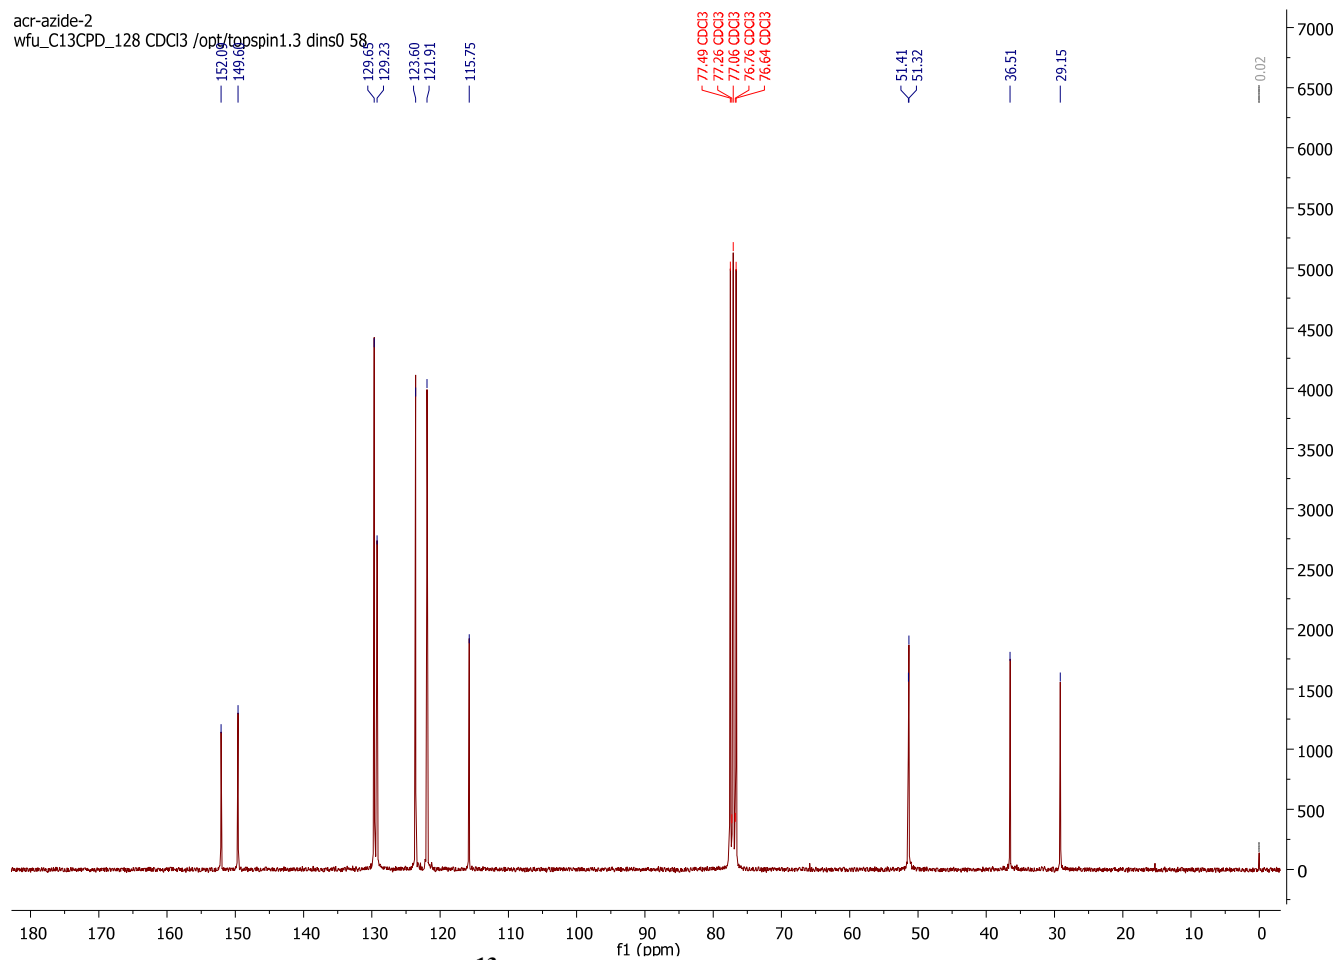

Figure S3.6.  $^{13}\text{C}$  NMR spectrum of compound A9.

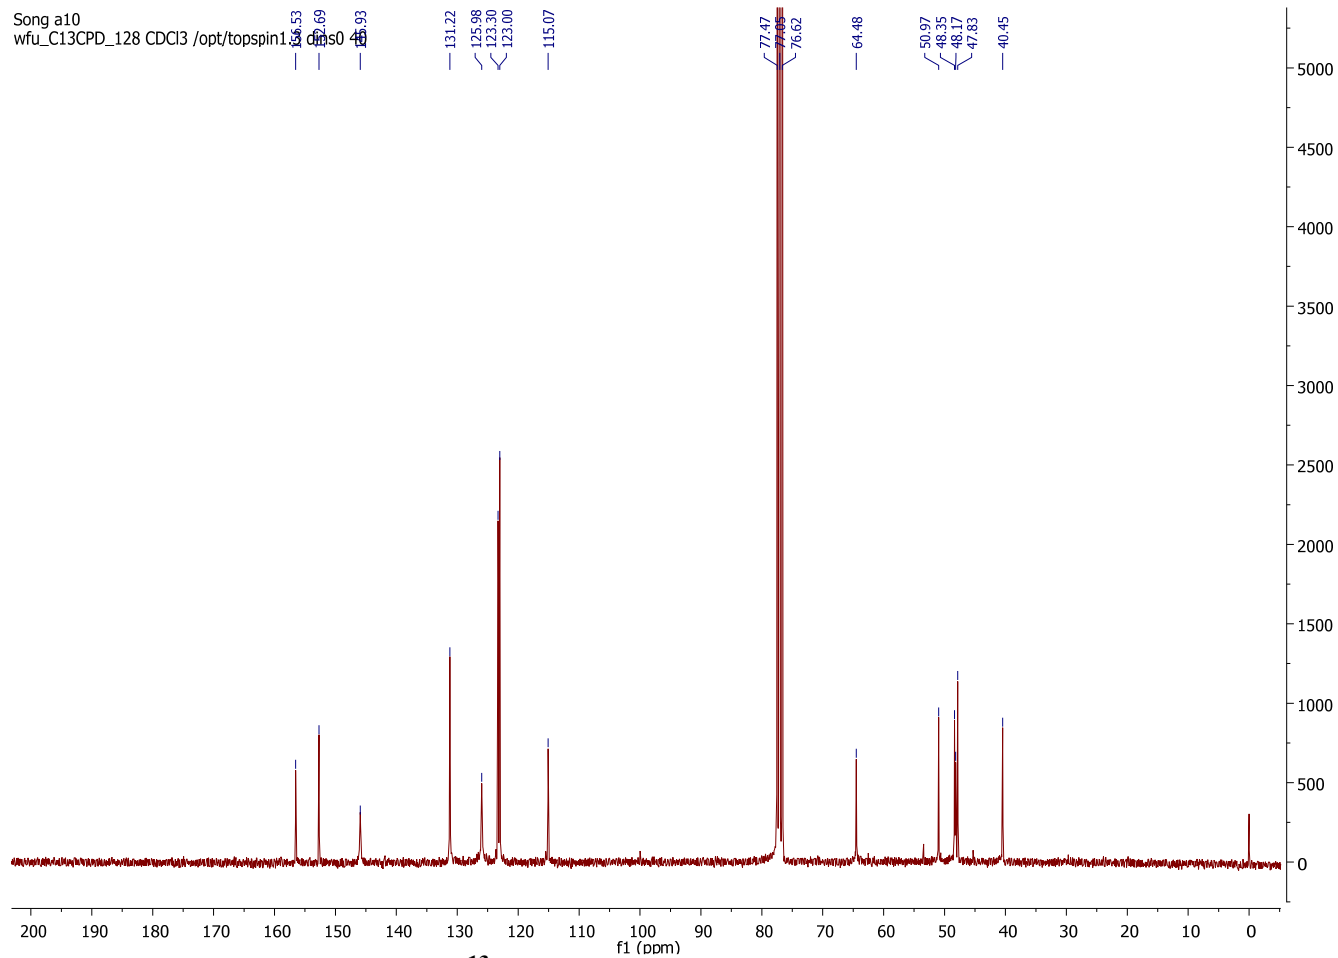

Figure S3.7.  $^{13}\text{C}$  NMR spectrum of compound A10.

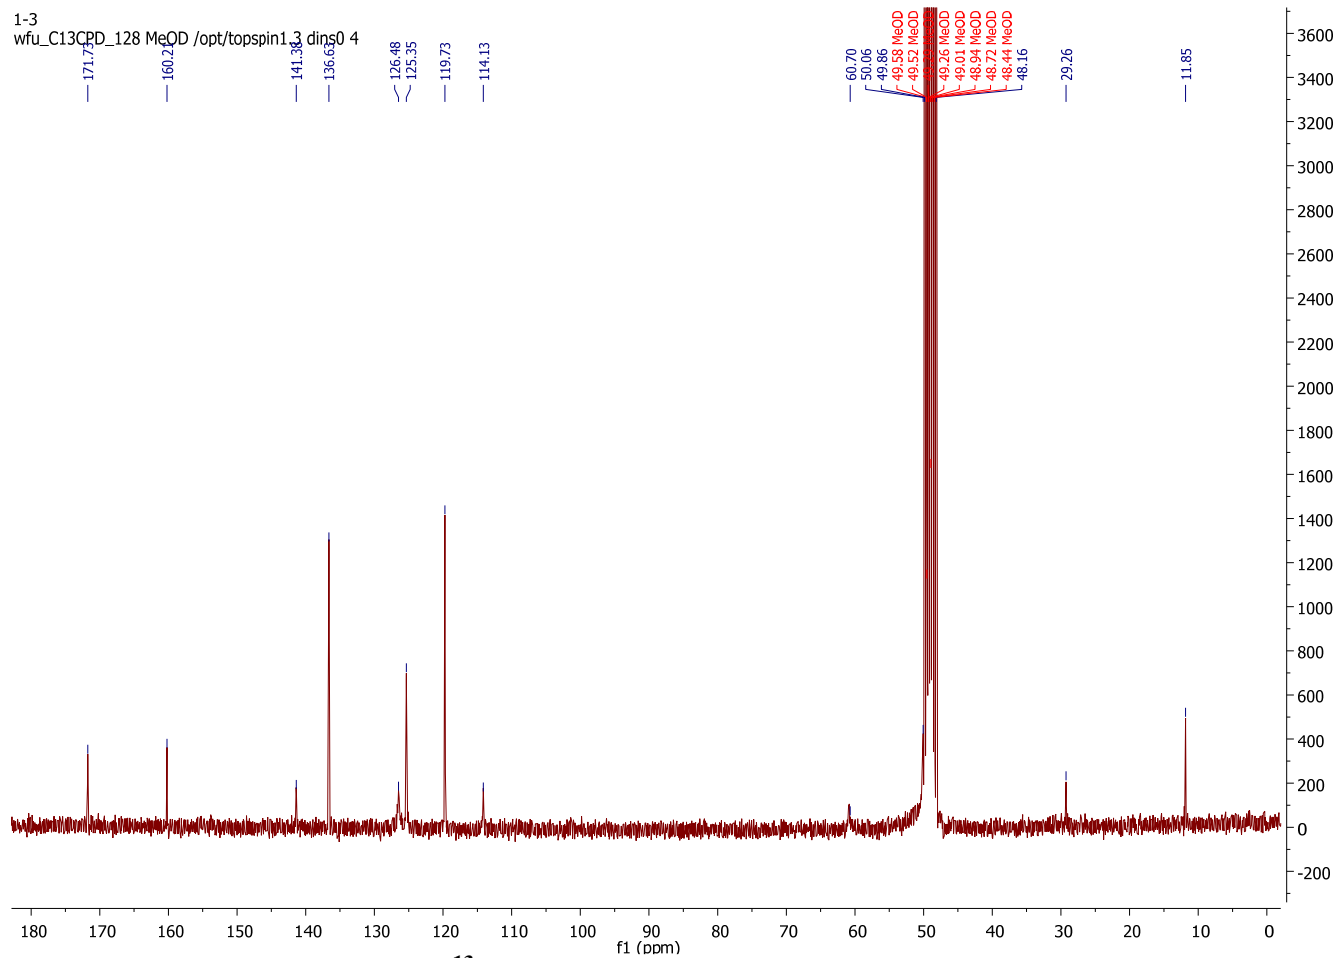

Figure S3.8.  $^{13}\text{C}$  NMR spectrum of compound P1-A3.

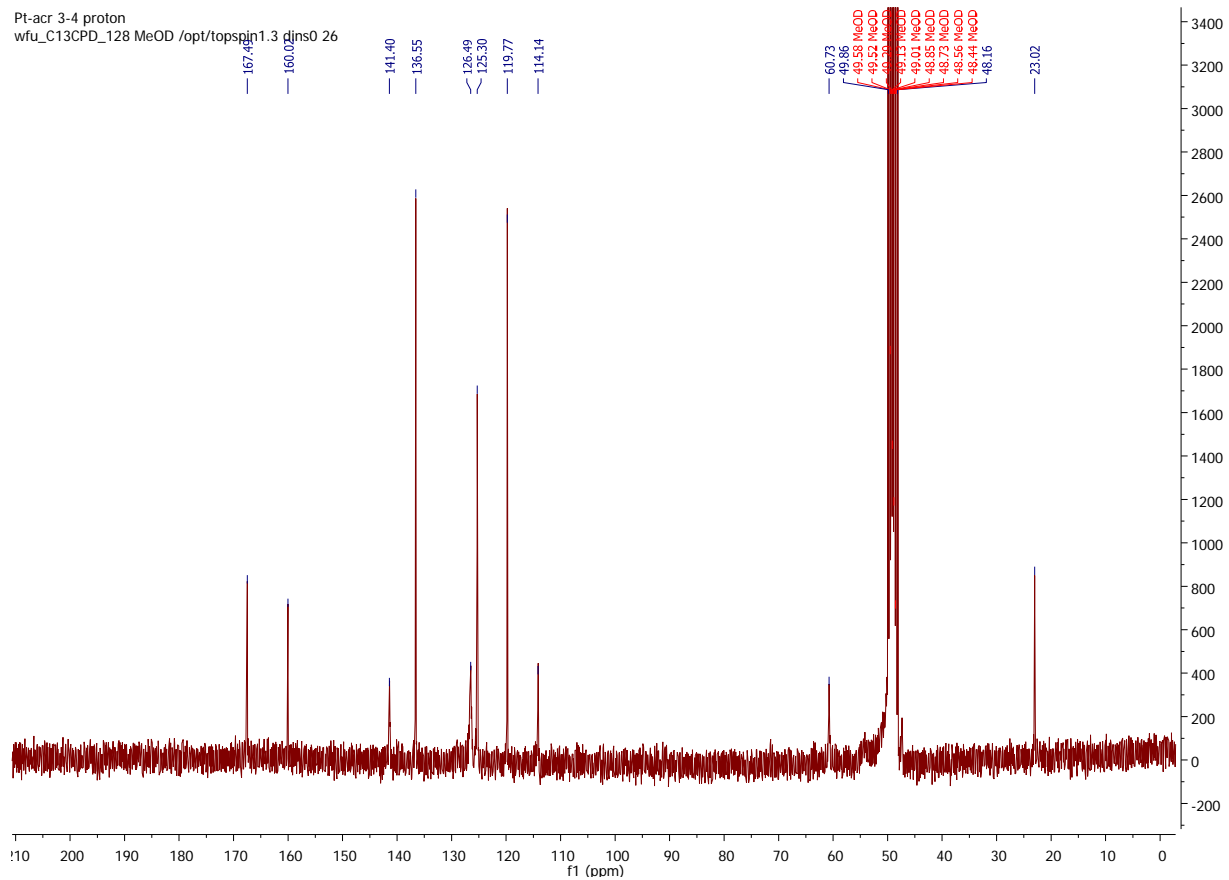

Figure S3.9.  $^{13}\text{C}$  NMR spectrum of compound P4-A3.

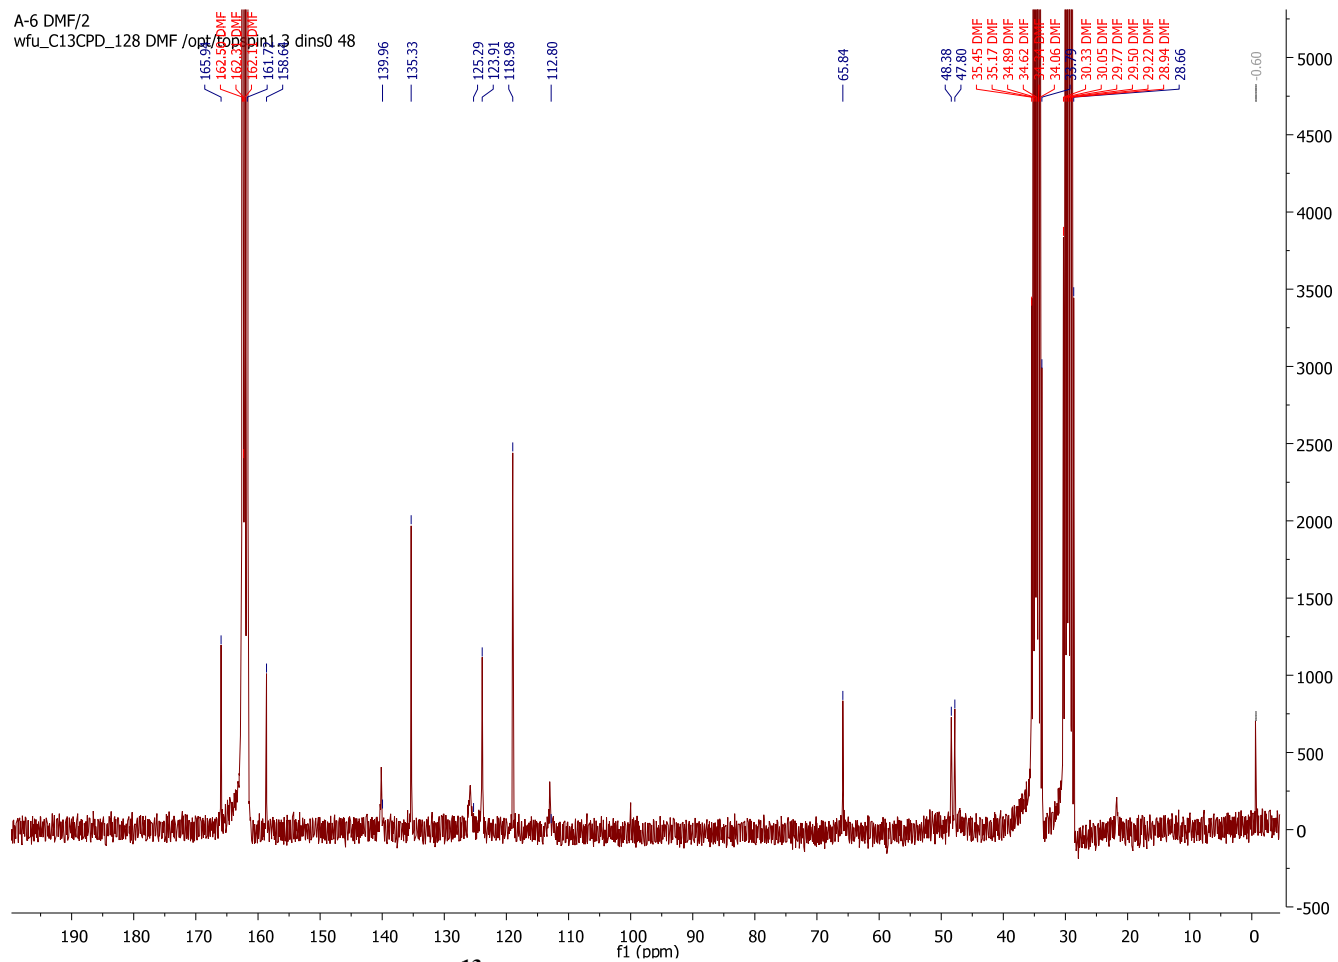

Figure S3.10.  $^{13}\text{C}$  NMR spectrum of compound P6-A1.

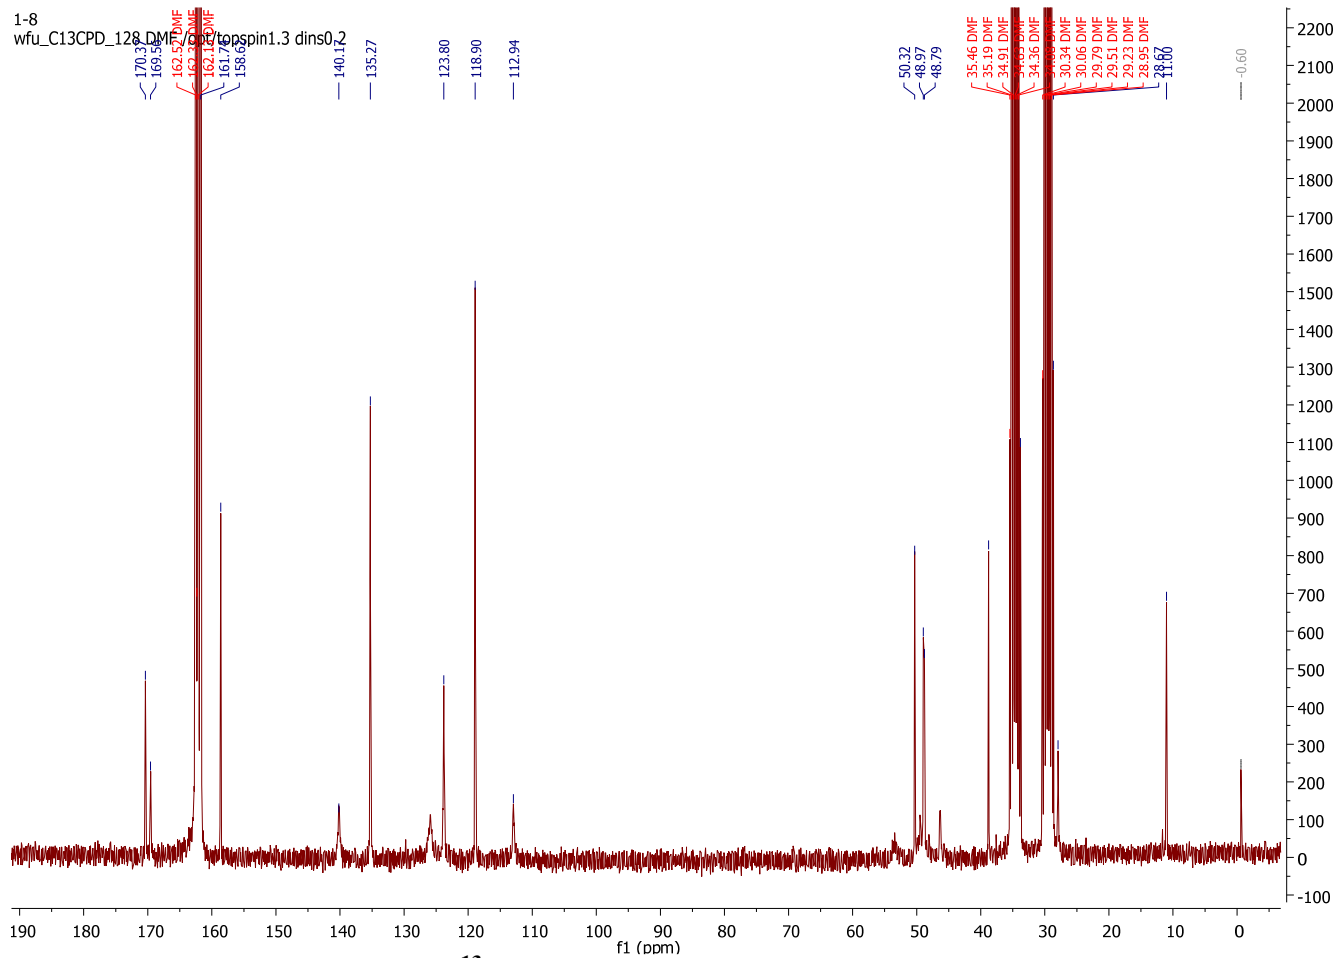

Figure S3.11.  $^{13}\text{C}$  NMR spectrum of compound P1-A8.



## 4. LC-MS analysis of purified compounds

### Compound Chromatogram Report - MS

**Analysis Name:** 04271219.D    **Instrument:** LC-MSD-Trap-SL    **Print Date:** 06/30/2012 11:13:15 PM  
**Method:** PTAMID~1.M    **Operator:** Administrator    **Acq. Date:** 4/28/2012 4:35:49 AM  
**Sample Name:** Acridine-aa  
**Analysis Info:** Free base

#### Acquisition Parameter:

|                 |             |                       |            |                |           |
|-----------------|-------------|-----------------------|------------|----------------|-----------|
| Mass Range Mode | Std/Normal  | Trap Drive            | 52.5       | Scan Begin     | 150 m/z   |
| Ion Polarity    | Positive    | Octopole RF Amplitude | 200.0 Vpp  | Scan End       | 2200 m/z  |
| Ion Source Type | ESI         | Capillary Exit        | 135.7 Volt | Averages       | 5 Spectra |
| Dry Temp (Set)  | 350 °C      | Skimmer               | 40.0 Volt  | Max. Accu Time | 200000 µs |
| Nebulizer (Set) | 50.00 psi   | Oct 1 DC              | 12.00 Volt | ICC Target     | 30000     |
| Dry Gas (Set)   | 11.00 l/min | Oct 2 DC              | 1.73 Volt  | Charge Control | on        |

#### Compound List:

| # | RT [min] | Range [min] | Height | Area | Area Frac % |
|---|----------|-------------|--------|------|-------------|
| 1 | 11.0     | 10.8 - 11.4 | 74     | 939  | 100.0       |

#### Chromatograms:

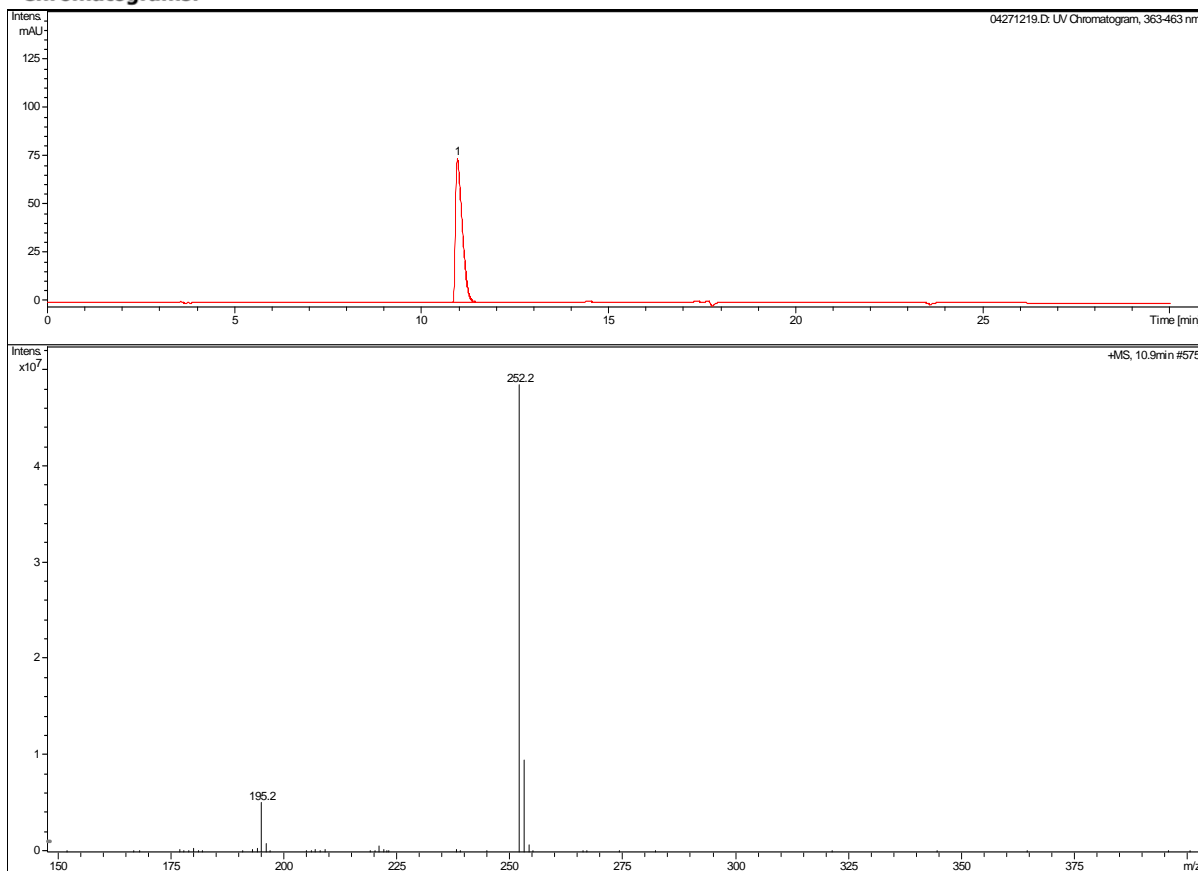

Figure S4.1. LC-MS analysis of compound A1.

# Compound Chromatogram Report - MS

**Analysis Name:** 05021201.D    **Instrument:** LC-MSD-Trap-SL    **Print Date:** 06/30/2012 11:33:52 PM  
**Method:** PTAMID~1.M    **Operator:** Administrator    **Acq. Date:** 5/2/2012 2:34:16 PM  
**Sample Name:** ACR-AA-2  
**Analysis Info:** FREE BASE

## Acquisition Parameter:

|                 |             |                       |            |                |           |
|-----------------|-------------|-----------------------|------------|----------------|-----------|
| Mass Range Mode | Std/Normal  | Trap Drive            | 52.5       | Scan Begin     | 150 m/z   |
| Ion Polarity    | Positive    | Octopole RF Amplitude | 200.0 Vpp  | Scan End       | 2200 m/z  |
| Ion Source Type | ESI         | Capillary Exit        | 135.7 Volt | Averages       | 5 Spectra |
| Dry Temp (Set)  | 350 °C      | Skimmer               | 40.0 Volt  | Max. Accu Time | 200000 µs |
| Nebulizer (Set) | 50.00 psi   | Oct 1 DC              | 12.00 Volt | ICC Target     | 30000     |
| Dry Gas (Set)   | 11.00 l/min | Oct 2 DC              | 1.73 Volt  | Charge Control | on        |

## Compound List:

| # | RT [min] | Range [min] | Height | Area | Area Frac % |
|---|----------|-------------|--------|------|-------------|
| 1 | 11.8     | 11.7 - 12.3 | 81     | 1161 | 100.0       |

## Chromatograms:

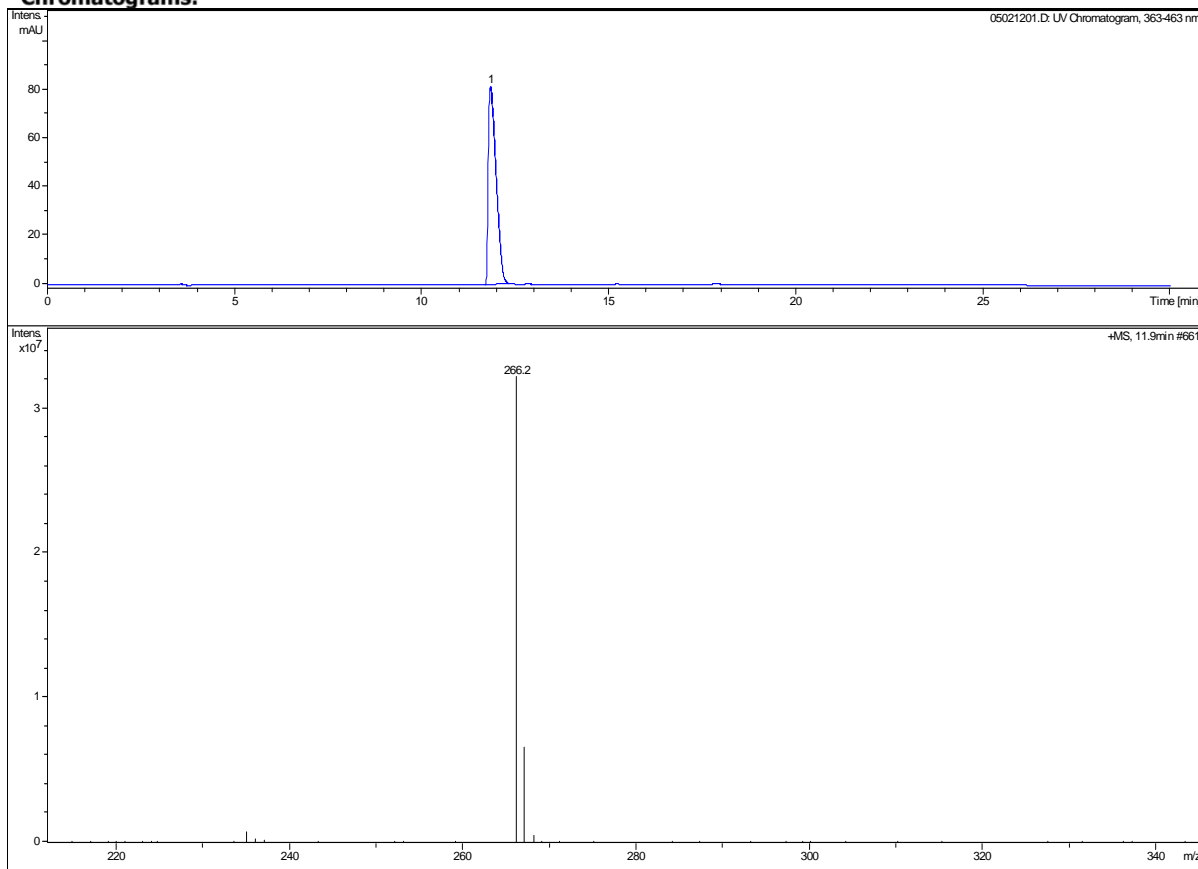

Figure S4.2. LC-MS analysis of compound A2.

# Compound Chromatogram Report - MS

**Analysis Name:** 04271212.D    **Instrument:** LC-MSD-Trap-SL    **Print Date:** 06/30/2012 11:16:46 PM  
**Method:** PTAMID~1.M    **Operator:** Administrator    **Acq. Date:** 4/27/2012 8:46:30 PM  
**Sample Name:** Acridine-OH-1  
**Analysis Info:** Free base

## Acquisition Parameter:

|                 |             |                       |            |                |           |
|-----------------|-------------|-----------------------|------------|----------------|-----------|
| Mass Range Mode | Std/Normal  | Trap Drive            | 52.5       | Scan Begin     | 150 m/z   |
| Ion Polarity    | Positive    | Octopole RF Amplitude | 200.0 Vpp  | Scan End       | 2200 m/z  |
| Ion Source Type | ESI         | Capillary Exit        | 135.7 Volt | Averages       | 5 Spectra |
| Dry Temp (Set)  | 350 °C      | Skimmer               | 40.0 Volt  | Max. Accu Time | 200000 µs |
| Nebulizer (Set) | 50.00 psi   | Oct 1 DC              | 12.00 Volt | ICC Target     | 30000     |
| Dry Gas (Set)   | 11.00 l/min | Oct 2 DC              | 1.73 Volt  | Charge Control | on        |

## Compound List:

| # | RT [min] | Range [min] | Height | Area | Area Frac % |
|---|----------|-------------|--------|------|-------------|
| 1 | 11.0     | 10.9 - 11.6 | 135    | 2190 | 100.0       |

## Chromatograms:

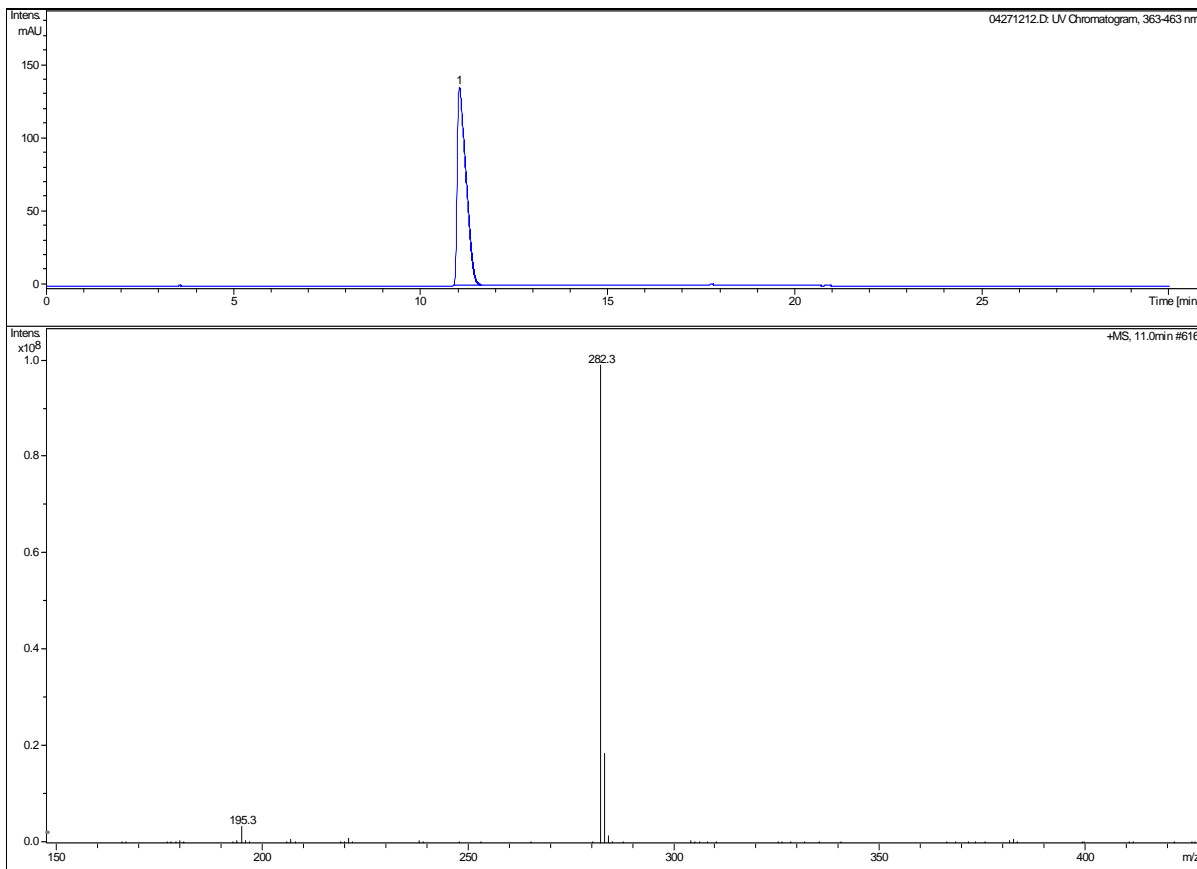

Figure S4.3. LC-MS analysis of compound A3.

# Compound Chromatogram Report - MS

**Analysis Name:** 04271213.D    **Instrument:** LC-MSD-Trap-SL    **Print Date:** 06/30/2012 11:18:32 PM  
**Method:** PTAMID~1.M    **Operator:** Administrator    **Acq. Date:** 4/27/2012 9:28:49 PM  
**Sample Name:** Acridine-OH-2  
**Analysis Info:** Free base

## Acquisition Parameter:

|                 |             |                       |            |                |           |
|-----------------|-------------|-----------------------|------------|----------------|-----------|
| Mass Range Mode | Std/Normal  | Trap Drive            | 52.5       | Scan Begin     | 150 m/z   |
| Ion Polarity    | Positive    | Octopole RF Amplitude | 200.0 Vpp  | Scan End       | 2200 m/z  |
| Ion Source Type | ESI         | Capillary Exit        | 135.7 Volt | Averages       | 5 Spectra |
| Dry Temp (Set)  | 350 °C      | Skimmer               | 40.0 Volt  | Max. Accu Time | 200000 µs |
| Nebulizer (Set) | 50.00 psi   | Oct 1 DC              | 12.00 Volt | ICC Target     | 30000     |
| Dry Gas (Set)   | 11.00 l/min | Oct 2 DC              | 1.73 Volt  | Charge Control | on        |

## Compound List:

| # | RT [min] | Range [min] | Height | Area | Area Frac % |
|---|----------|-------------|--------|------|-------------|
| 1 | 11.3     | 11.1 - 11.7 | 73     | 885  | 100.0       |

## Chromatograms:

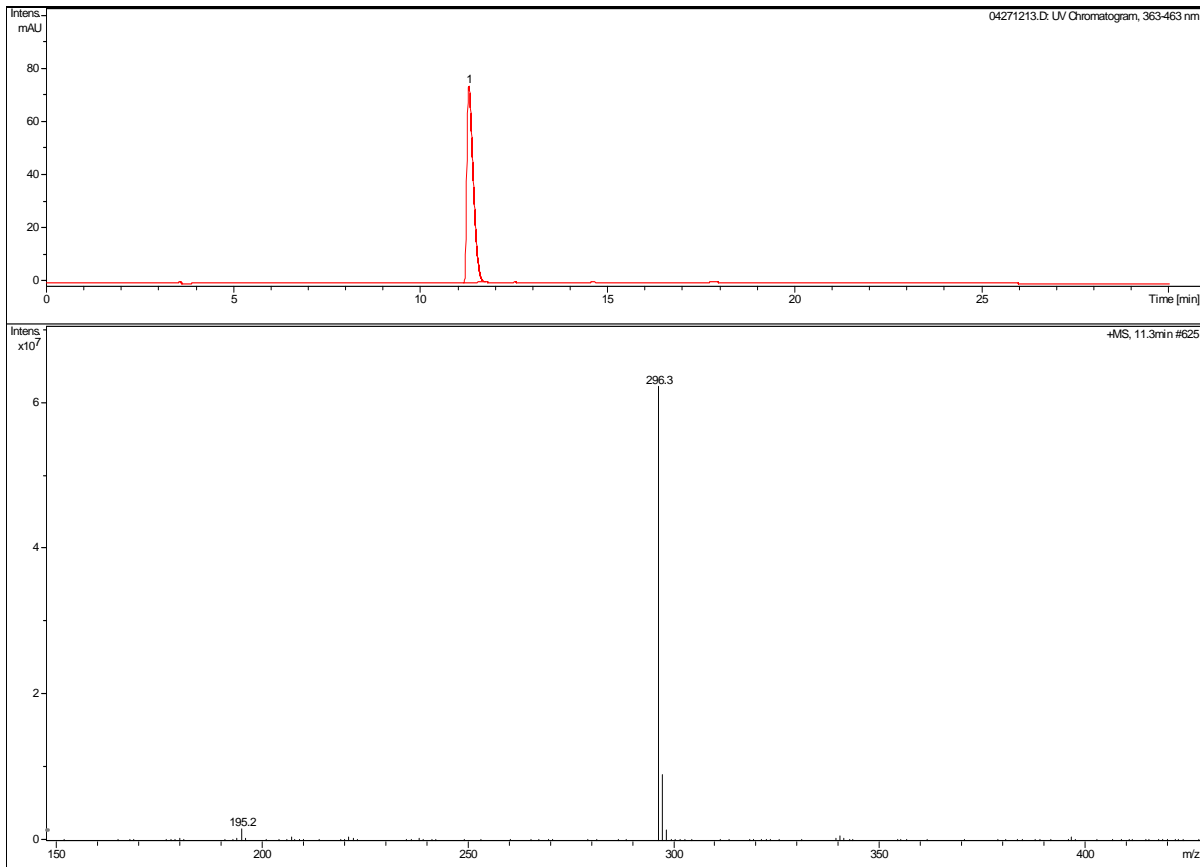

Figure S4.4. LC-MS analysis of compound A4.

# Compound Chromatogram Report - MS

**Analysis Name:** 04271214.D      **Instrument:** LC-MSD-Trap-SL      **Print Date:** 06/30/2012 11:20:01 PM  
**Method:** PTAMID~1.M      **Operator:** Administrator      **Acq. Date:** 4/27/2012 10:08:42 PM  
**Sample Name:** Acridine-COOH-1  
**Analysis Info:** Free base

## Acquisition Parameter:

|                 |             |                       |            |                |           |
|-----------------|-------------|-----------------------|------------|----------------|-----------|
| Mass Range Mode | Std/Normal  | Trap Drive            | 52.5       | Scan Begin     | 150 m/z   |
| Ion Polarity    | Positive    | Octopole RF Amplitude | 200.0 Vpp  | Scan End       | 2200 m/z  |
| Ion Source Type | ESI         | Capillary Exit        | 135.7 Volt | Averages       | 5 Spectra |
| Dry Temp (Set)  | 350 °C      | Skimmer               | 40.0 Volt  | Max. Accu Time | 200000 µs |
| Nebulizer (Set) | 50.00 psi   | Oct 1 DC              | 12.00 Volt | ICC Target     | 30000     |
| Dry Gas (Set)   | 11.00 l/min | Oct 2 DC              | 1.73 Volt  | Charge Control | on        |

## Compound List:

| # | RT [min] | Range [min] | Height | Area | Area Frac % |
|---|----------|-------------|--------|------|-------------|
| 1 | 13.3     | 13.1 - 13.6 | 41     | 387  | 100.0       |

## Chromatograms:

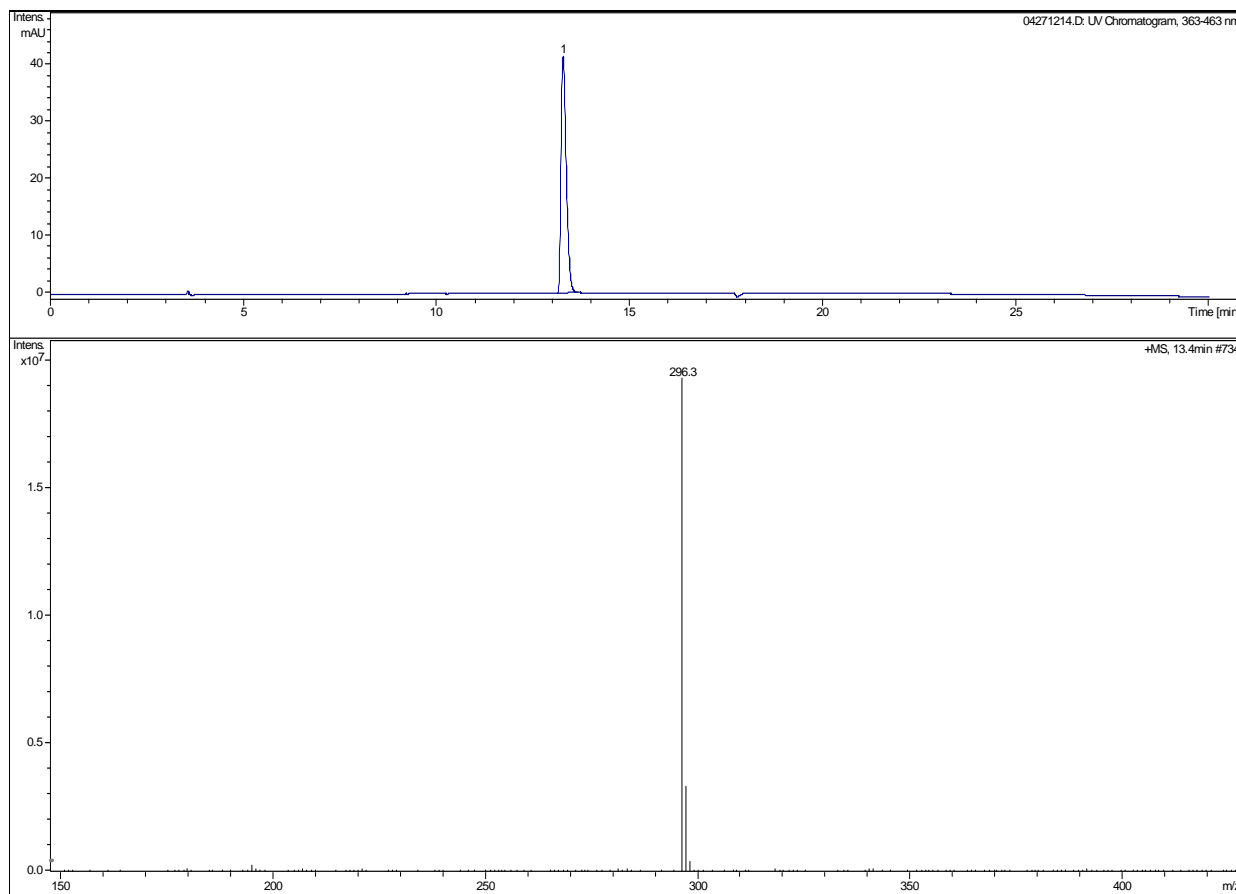

Figure S4.5. LC-MS analysis of compound A5.

# Compound Chromatogram Report - MS

**Analysis Name:** 04271221.D    **Instrument:** LC-MSD-Trap-SL    **Print Date:** 06/30/2012 11:23:43 PM  
**Method:** PTAMID~1.M    **Operator:** Administrator    **Acq. Date:** 4/28/2012 10:58:15 AM  
**Sample Name:** Acridine-COOH-2  
**Analysis Info:** Free base

## Acquisition Parameter:

|                 |             |                       |            |                |           |
|-----------------|-------------|-----------------------|------------|----------------|-----------|
| Mass Range Mode | Std/Normal  | Trap Drive            | 52.5       | Scan Begin     | 150 m/z   |
| Ion Polarity    | Positive    | Octopole RF Amplitude | 200.0 Vpp  | Scan End       | 2200 m/z  |
| Ion Source Type | ESI         | Capillary Exit        | 135.7 Volt | Averages       | 5 Spectra |
| Dry Temp (Set)  | 350 °C      | Skimmer               | 40.0 Volt  | Max. Accu Time | 200000 µs |
| Nebulizer (Set) | 50.00 psi   | Oct 1 DC              | 12.00 Volt | ICC Target     | 30000     |
| Dry Gas (Set)   | 11.00 l/min | Oct 2 DC              | 1.73 Volt  | Charge Control | on        |

## Compound List:

| # | RT [min] | Range [min] | Height | Area | Area Frac % |
|---|----------|-------------|--------|------|-------------|
| 1 | 11.9     | 11.8 - 12.3 | 23     | 208  | 100.0       |

## Chromatograms:

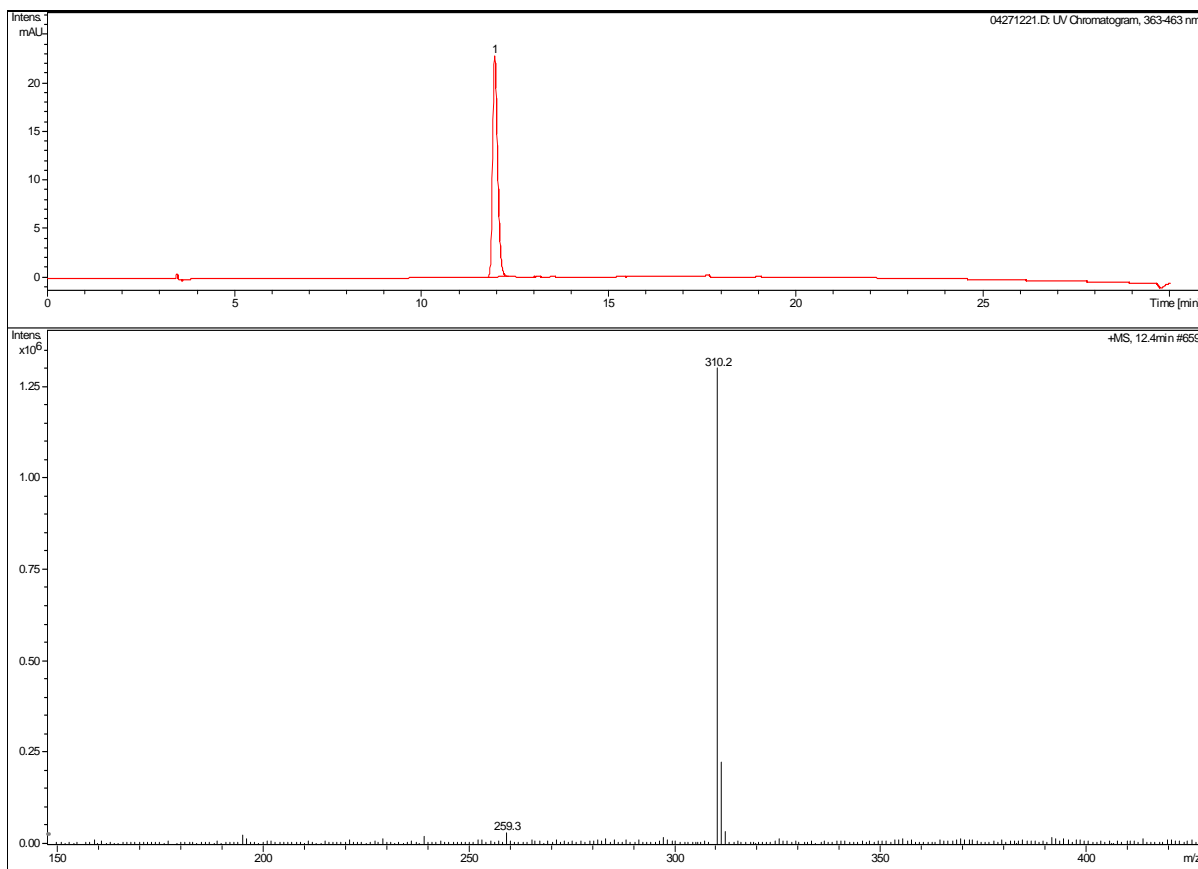

Figure S4.6. LC-MS analysis of compound A6.

# Compound Chromatogram Report - MS

**Analysis Name:** 04271216.D      **Instrument:** LC-MSD-Trap-SL      **Print Date:** 06/30/2012 11:25:38 PM  
**Method:** PTAMID~1.M      **Operator:** Administrator      **Acq. Date:** 4/27/2012 11:50:30 PM  
**Sample Name:** Acridine-COOH-3  
**Analysis Info:** Free base

## Acquisition Parameter:

|                 |             |                       |            |                |           |
|-----------------|-------------|-----------------------|------------|----------------|-----------|
| Mass Range Mode | Std/Normal  | Trap Drive            | 52.5       | Scan Begin     | 150 m/z   |
| Ion Polarity    | Positive    | Octopole RF Amplitude | 200.0 Vpp  | Scan End       | 2200 m/z  |
| Ion Source Type | ESI         | Capillary Exit        | 135.7 Volt | Averages       | 5 Spectra |
| Dry Temp (Set)  | 350 °C      | Skimmer               | 40.0 Volt  | Max. Accu Time | 200000 µs |
| Nebulizer (Set) | 50.00 psi   | Oct 1 DC              | 12.00 Volt | ICC Target     | 30000     |
| Dry Gas (Set)   | 11.00 l/min | Oct 2 DC              | 1.73 Volt  | Charge Control | on        |

## Compound List:

| # | RT [min] | Range [min] | Height | Area | Area Frac % |
|---|----------|-------------|--------|------|-------------|
| 1 | 14.0     | 13.9 - 14.4 | 19     | 165  | 100.0       |

## Chromatograms:

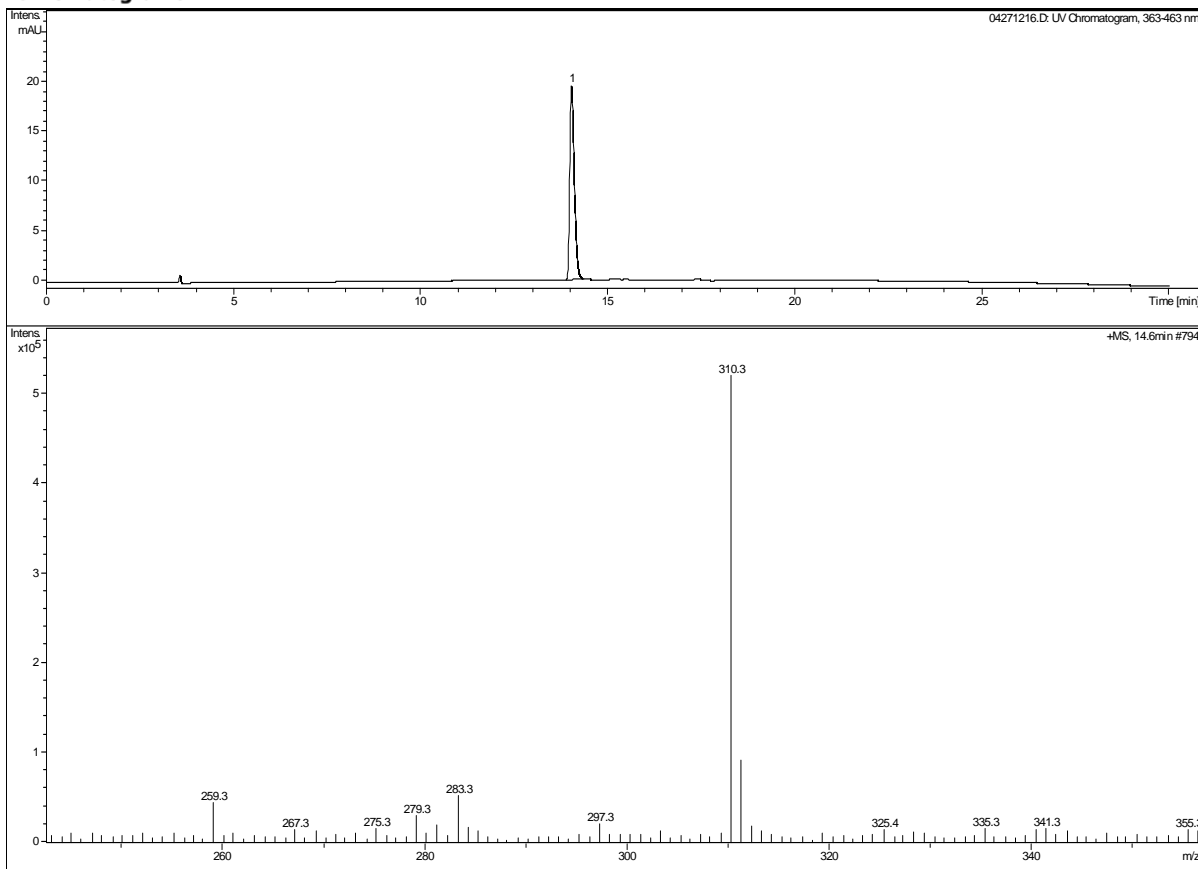

Figure S4.7. LC-MS analysis of compound A7.

# Compound Chromatogram Report - MS

**Analysis Name:** 04271217.D    **Instrument:** LC-MSD-Trap-SL    **Print Date:** 06/30/2012 11:29:19 PM  
**Method:** PTAMID~1.M    **Operator:** Administrator    **Acq. Date:** 4/28/2012 1:32:02 AM  
**Sample Name:** Acridine-azide-1  
**Analysis Info:** Free base

## Acquisition Parameter:

|                 |             |                       |            |                |           |
|-----------------|-------------|-----------------------|------------|----------------|-----------|
| Mass Range Mode | Std/Normal  | Trap Drive            | 52.5       | Scan Begin     | 150 m/z   |
| Ion Polarity    | Positive    | Octopole RF Amplitude | 200.0 Vpp  | Scan End       | 2200 m/z  |
| Ion Source Type | ESI         | Capillary Exit        | 135.7 Volt | Averages       | 5 Spectra |
| Dry Temp (Set)  | 350 °C      | Skimmer               | 40.0 Volt  | Max. Accu Time | 200000 µs |
| Nebulizer (Set) | 50.00 psi   | Oct 1 DC              | 12.00 Volt | ICC Target     | 30000     |
| Dry Gas (Set)   | 11.00 l/min | Oct 2 DC              | 1.73 Volt  | Charge Control | on        |

## Compound List:

| # | RT [min] | Range [min] | Height | Area | Area Frac % |
|---|----------|-------------|--------|------|-------------|
| 1 | 13.3     | 12.7 - 13.7 | 21     | 223  | 100.0       |

## Chromatograms:

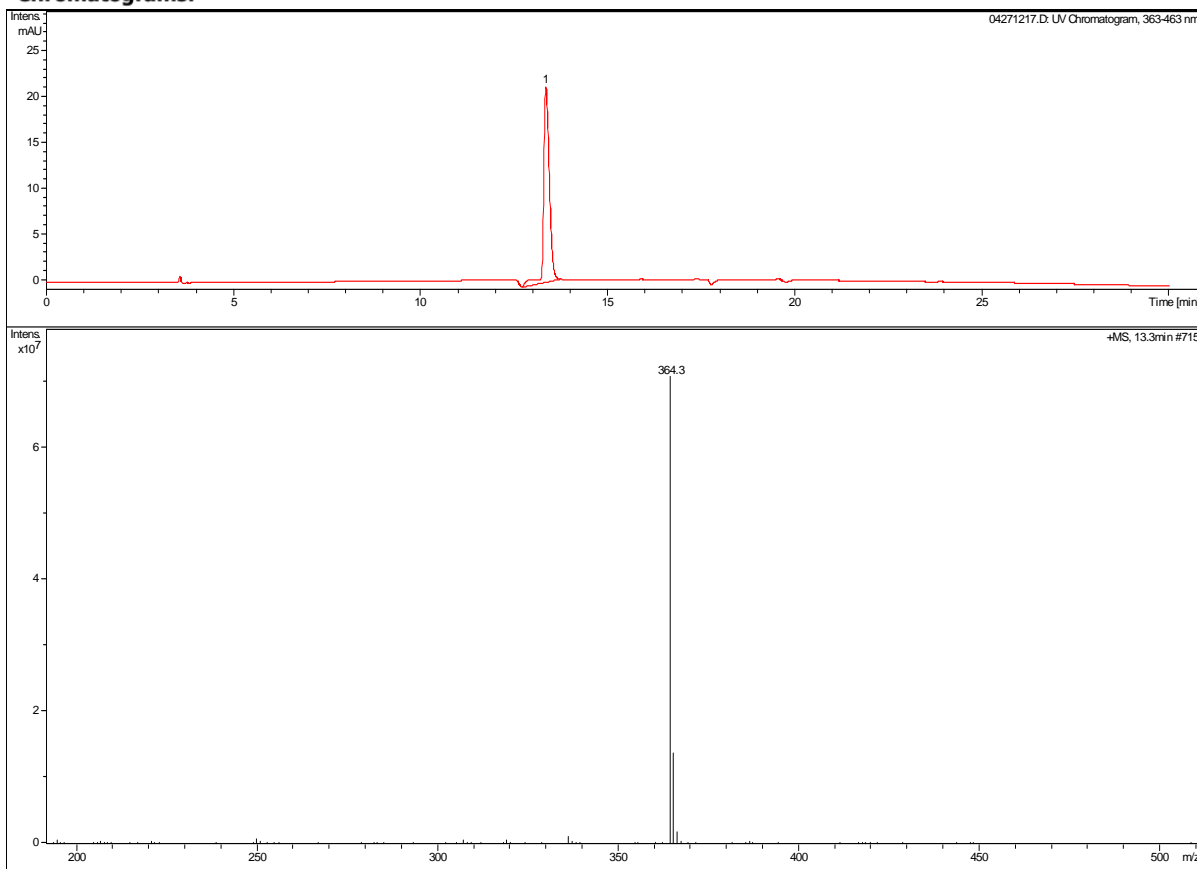

Figure S4.8. LC-MS analysis of compound A8.



# Compound Chromatogram Report - MS

**Analysis Name:** 05021202.D    **Instrument:** LC-MSD-Trap-SL    **Print Date:** 06/30/2012 11:32:07 PM  
**Method:** PTAMID~1.M    **Operator:** Administrator    **Acq. Date:** 5/2/2012 3:17:52 PM  
**Sample Name:** ACR-azide-2  
**Analysis Info:** FREE BASE

## Acquisition Parameter:

|                 |             |                       |            |                |           |
|-----------------|-------------|-----------------------|------------|----------------|-----------|
| Mass Range Mode | Std/Normal  | Trap Drive            | 52.5       | Scan Begin     | 150 m/z   |
| Ion Polarity    | Positive    | Octopole RF Amplitude | 200.0 Vpp  | Scan End       | 2200 m/z  |
| Ion Source Type | ESI         | Capillary Exit        | 135.7 Volt | Averages       | 5 Spectra |
| Dry Temp (Set)  | 350 °C      | Skimmer               | 40.0 Volt  | Max. Accu Time | 200000 µs |
| Nebulizer (Set) | 50.00 psi   | Oct 1 DC              | 12.00 Volt | ICC Target     | 30000     |
| Dry Gas (Set)   | 11.00 l/min | Oct 2 DC              | 1.73 Volt  | Charge Control | on        |

## Compound List:

| # | RT [min] | Range [min] | Height | Area | Area Frac % |
|---|----------|-------------|--------|------|-------------|
| 1 | 13.1     | 12.9 - 13.5 | 39     | 464  | 100.0       |

## Chromatograms:

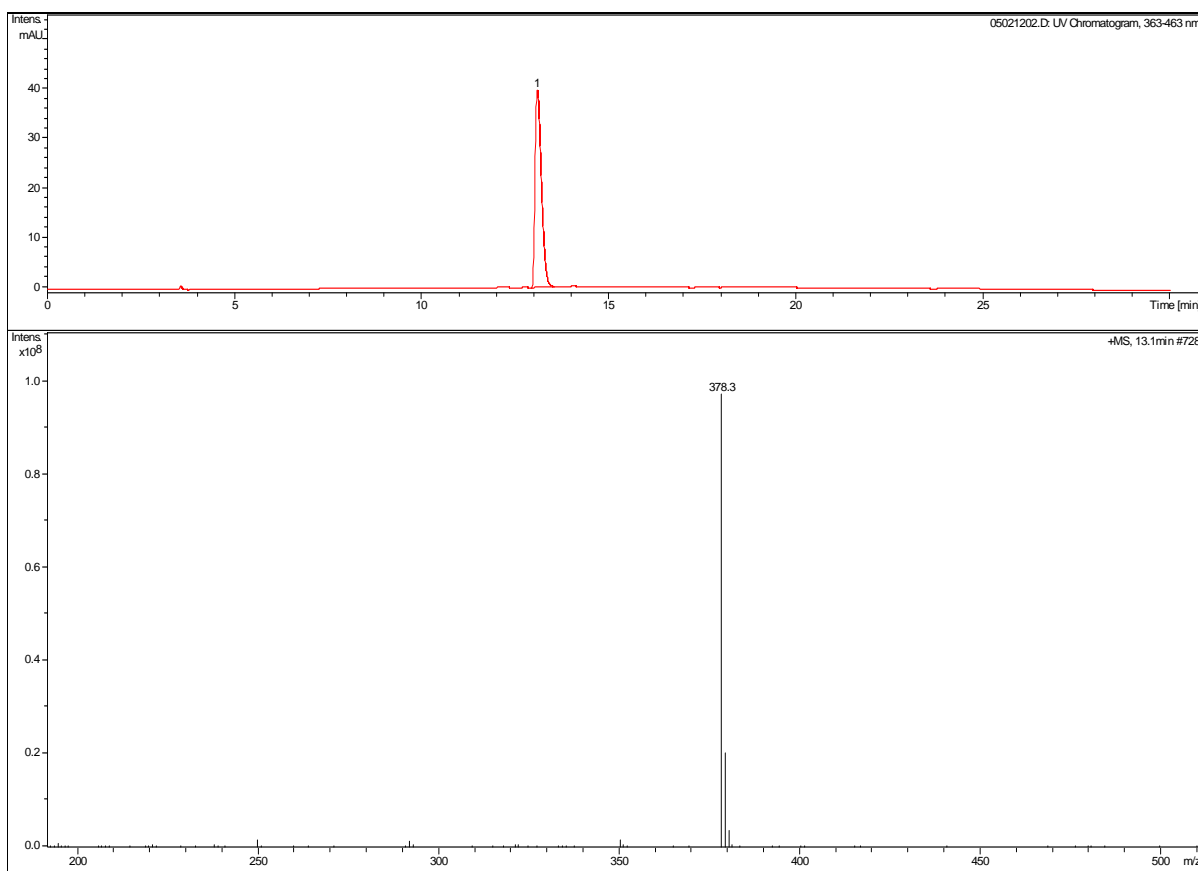

Figure S4.9. LC-MS analysis of compound A9.

# Compound Chromatogram Report - MS

**Analysis Name:** 04271222.D    **Instrument:** LC-MSD-Trap-SL    **Print Date:** 06/30/2012 11:15:22 PM  
**Method:** PTAMID~1.M    **Operator:** Administrator    **Acq. Date:** 4/28/2012 11:36:27 AM  
**Sample Name:** Acridine-Azide-3  
**Analysis Info:** Free base

## Acquisition Parameter:

|                 |             |                       |            |                |           |
|-----------------|-------------|-----------------------|------------|----------------|-----------|
| Mass Range Mode | Std/Normal  | Trap Drive            | 52.5       | Scan Begin     | 150 m/z   |
| Ion Polarity    | Positive    | Octopole RF Amplitude | 200.0 Vpp  | Scan End       | 2200 m/z  |
| Ion Source Type | ESI         | Capillary Exit        | 135.7 Volt | Averages       | 5 Spectra |
| Dry Temp (Set)  | 350 °C      | Skimmer               | 40.0 Volt  | Max. Accu Time | 200000 µs |
| Nebulizer (Set) | 50.00 psi   | Oct 1 DC              | 12.00 Volt | ICC Target     | 30000     |
| Dry Gas (Set)   | 11.00 l/min | Oct 2 DC              | 1.73 Volt  | Charge Control | on        |

## Compound List:

| # | RT [min] | Range [min] | Height | Area | Area Frac % |
|---|----------|-------------|--------|------|-------------|
| 1 | 13.0     | 12.8 - 13.5 | 58     | 773  | 100.0       |

## Chromatograms:

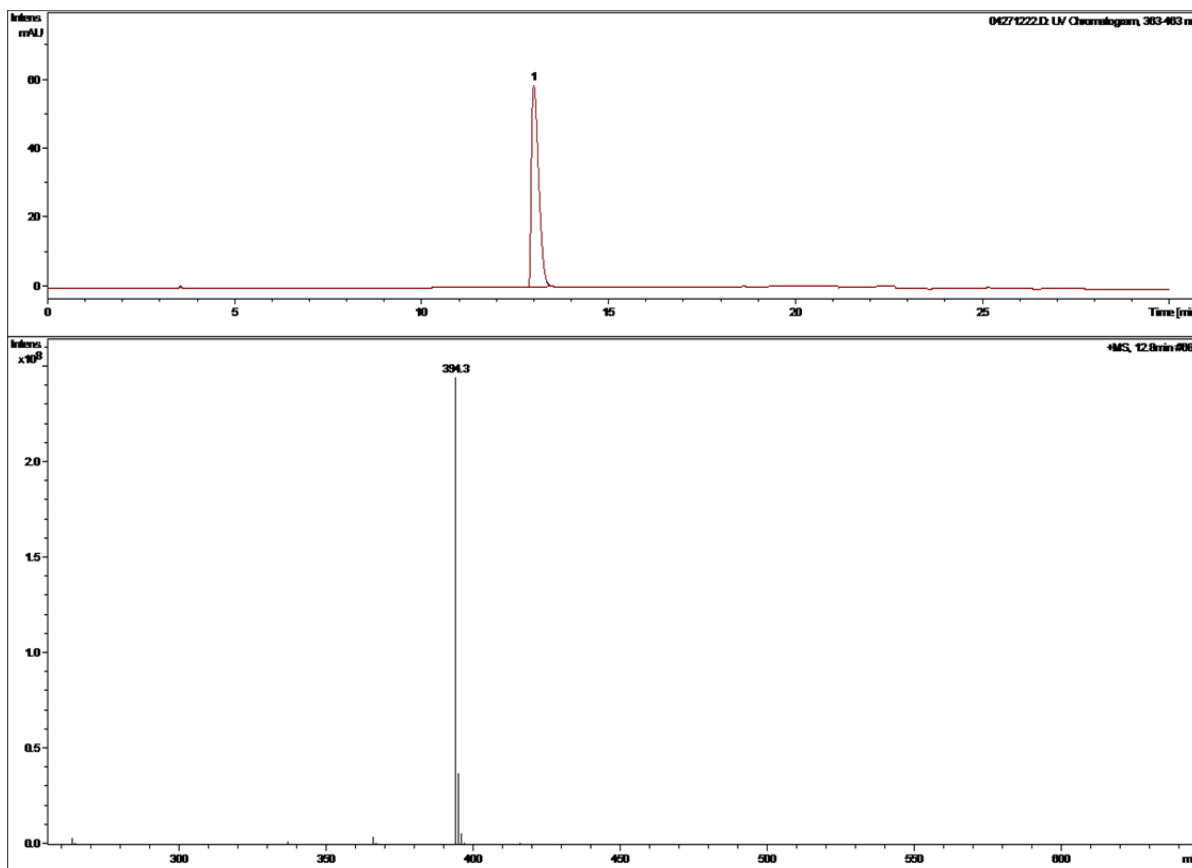

Figure S4.10. LC-MS analysis of compound A10.

# Compound Chromatogram Report - MS

**Analysis Name:** 05261207.D      **Instrument:** LC-MSD-Trap-SL      **Print Date:** 06/30/2012 11:38:50 PM  
**Method:** PTAMID~1.M      **Operator:** Administrator      **Acq. Date:** 5/28/2012 4:20:45 PM  
**Sample Name:** En-Pt-OH  
**Analysis Info:** 1-3 N=2,2+

## Acquisition Parameter:

|                 |             |                       |            |                |           |
|-----------------|-------------|-----------------------|------------|----------------|-----------|
| Mass Range Mode | Std/Normal  | Trap Drive            | 52.5       | Scan Begin     | 150 m/z   |
| Ion Polarity    | Positive    | Octopole RF Amplitude | 200.0 Vpp  | Scan End       | 2200 m/z  |
| Ion Source Type | ESI         | Capillary Exit        | 135.7 Volt | Averages       | 5 Spectra |
| Dry Temp (Set)  | 350 °C      | Skimmer               | 40.0 Volt  | Max. Accu Time | 200000 µs |
| Nebulizer (Set) | 50.00 psi   | Oct 1 DC              | 12.00 Volt | ICC Target     | 30000     |
| Dry Gas (Set)   | 11.00 l/min | Oct 2 DC              | 1.73 Volt  | Charge Control | on        |

## Compound List:

| # | RT [min] | Range [min] | Height | Area | Area Frac % |
|---|----------|-------------|--------|------|-------------|
| 1 | 14.0     | 13.8 - 14.4 | 15     | 149  | 100.0       |

## Chromatograms:

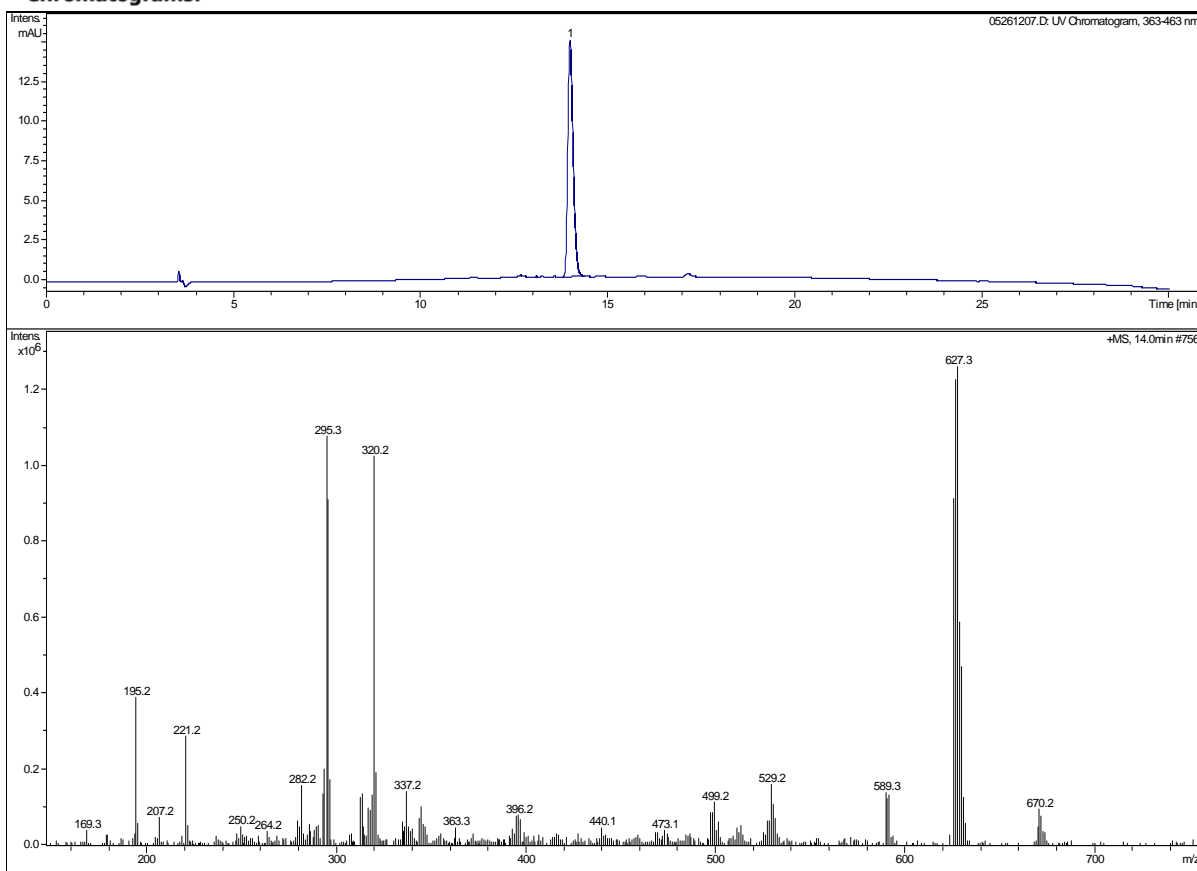

Figure S4.11. LC-MS analysis of compound P1-A3.

# Compound Chromatogram Report - MS

**Analysis Name:** 05261205.D    **Instrument:** LC-MSD-Trap-SL    **Print Date:** 06/30/2012 11:46:43 PM  
**Method:** PTAMID~1.M    **Operator:** Administrator    **Acq. Date:** 5/28/2012 2:58:04 PM  
**Sample Name:** diam-Pt-OH  
**Analysis Info:** N=2,2+

## Acquisition Parameter:

|                 |             |                       |            |                |           |
|-----------------|-------------|-----------------------|------------|----------------|-----------|
| Mass Range Mode | Std/Normal  | Trap Drive            | 52.5       | Scan Begin     | 150 m/z   |
| Ion Polarity    | Positive    | Octopole RF Amplitude | 200.0 Vpp  | Scan End       | 2200 m/z  |
| Ion Source Type | ESI         | Capillary Exit        | 135.7 Volt | Averages       | 5 Spectra |
| Dry Temp (Set)  | 350 °C      | Skimmer               | 40.0 Volt  | Max. Accu Time | 200000 µs |
| Nebulizer (Set) | 50.00 psi   | Oct 1 DC              | 12.00 Volt | ICC Target     | 30000     |
| Dry Gas (Set)   | 11.00 l/min | Oct 2 DC              | 1.73 Volt  | Charge Control | on        |

## Compound List:

| # | RT [min] | Range [min] | Height | Area | Area Frac % |
|---|----------|-------------|--------|------|-------------|
| 1 | 10.0     | 9.8 - 10.2  | 19     | 141  | 100.0       |

## Chromatograms:

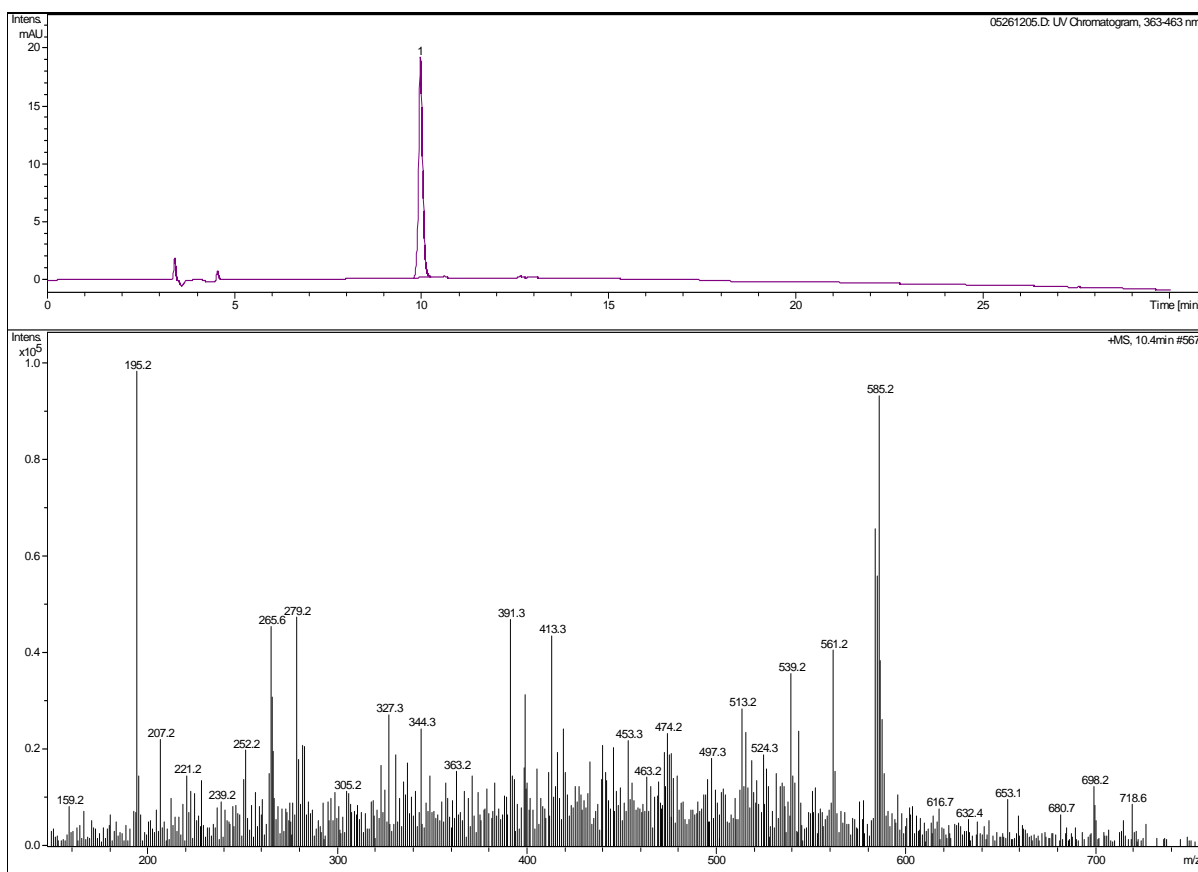

**Figure S4.12. LC-MS analysis of compound P4-A3.**

# Compound Chromatogram Report - MS

**Analysis Name:** 06011211.D      **Instrument:** LC-MSD-Trap-SL      **Print Date:** 06/30/2012 11:47:38 PM  
**Method:** PTAMID~1.M      **Operator:** Administrator      **Acq. Date:** 6/1/2012 11:37:28 AM  
**Sample Name:** 6-1  
**Analysis Info:**

## Acquisition Parameter:

|                 |             |                       |            |                |           |
|-----------------|-------------|-----------------------|------------|----------------|-----------|
| Mass Range Mode | Std/Normal  | Trap Drive            | 52.5       | Scan Begin     | 150 m/z   |
| Ion Polarity    | Positive    | Octopole RF Amplitude | 200.0 Vpp  | Scan End       | 2200 m/z  |
| Ion Source Type | ESI         | Capillary Exit        | 135.7 Volt | Averages       | 5 Spectra |
| Dry Temp (Set)  | 350 °C      | Skimmer               | 40.0 Volt  | Max. Accu Time | 200000 µs |
| Nebulizer (Set) | 50.00 psi   | Oct 1 DC              | 12.00 Volt | ICC Target     | 30000     |
| Dry Gas (Set)   | 11.00 l/min | Oct 2 DC              | 1.73 Volt  | Charge Control | on        |

## Compound List:

| # | RT [min] | Range [min] | Height | Area | Area Frac % |
|---|----------|-------------|--------|------|-------------|
| 1 | 13.3     | 13.1 - 13.7 | 26     | 260  | 100.0       |

## Chromatograms:

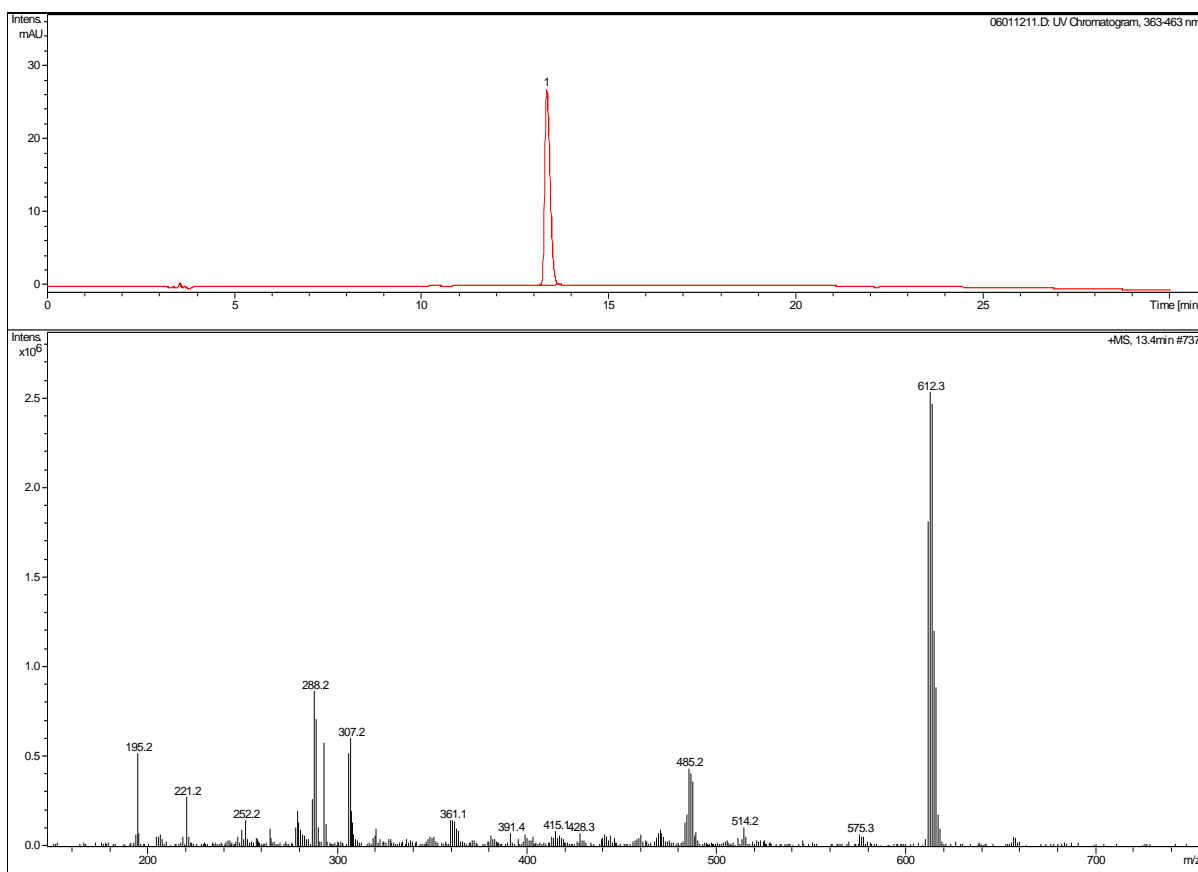

Figure S4.13. LC-MS analysis of compound P6-A1.

# Compound Chromatogram Report - MS

**Analysis Name:** 02091211.D    **Instrument:** LC-MSD-Trap-SL    **Print Date:** 06/30/2012 11:58:31 PM  
**Method:** PTAMID~1.M    **Operator:** Administrator    **Acq. Date:** 2/9/2012 4:31:15 PM  
**Sample Name:** pt-azide  
**Analysis Info:** n=1 2+

## Acquisition Parameter:

|                 |             |                       |            |                |           |
|-----------------|-------------|-----------------------|------------|----------------|-----------|
| Mass Range Mode | Std/Normal  | Trap Drive            | 52.5       | Scan Begin     | 150 m/z   |
| Ion Polarity    | Positive    | Octopole RF Amplitude | 200.0 Vpp  | Scan End       | 2200 m/z  |
| Ion Source Type | ESI         | Capillary Exit        | 135.7 Volt | Averages       | 5 Spectra |
| Dry Temp (Set)  | 350 °C      | Skimmer               | 40.0 Volt  | Max. Accu Time | 200000 µs |
| Nebulizer (Set) | 50.00 psi   | Oct 1 DC              | 12.00 Volt | ICC Target     | 30000     |
| Dry Gas (Set)   | 11.00 l/min | Oct 2 DC              | 1.73 Volt  | Charge Control | on        |

## Compound List:

| # | RT [min] | Range [min] | Height | Area | Area Frac % |
|---|----------|-------------|--------|------|-------------|
| 1 | 16.6     | 15.9 - 16.9 | 10     | 120  | 100.0       |

## Chromatograms:

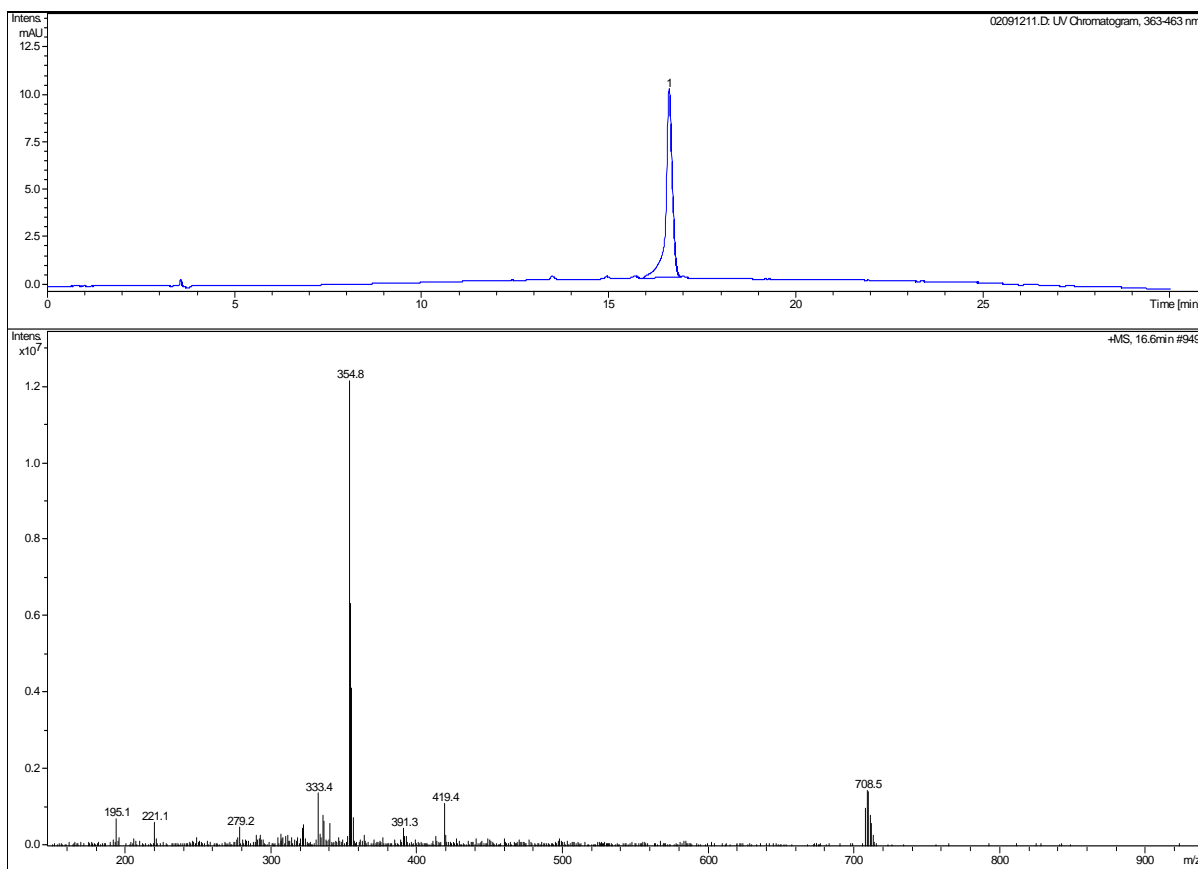

Figure S4.14. LC-MS analysis of compound P1-A8.

# Compound Chromatogram Report - MS

**Analysis Name:** 06121202.D    **Instrument:** LC-MSD-Trap-SL    **Print Date:** 06/12/2012 11:43:54 AM  
**Method:** PTAMID~1.M    **Operator:** Administrator    **Acq. Date:** 6/12/2012 10:35:00 AM  
**Sample Name:** 3-7  
**Analysis Info:**

## Acquisition Parameter:

|                 |             |                       |            |                |           |
|-----------------|-------------|-----------------------|------------|----------------|-----------|
| Mass Range Mode | Std/Normal  | Trap Drive            | 52.5       | Scan Begin     | 150 m/z   |
| Ion Polarity    | Positive    | Octopole RF Amplitude | 200.0 Vpp  | Scan End       | 2200 m/z  |
| Ion Source Type | ESI         | Capillary Exit        | 135.7 Volt | Averages       | 5 Spectra |
| Dry Temp (Set)  | 350 °C      | Skimmer               | 40.0 Volt  | Max. Accu Time | 200000 µs |
| Nebulizer (Set) | 50.00 psi   | Oct 1 DC              | 12.00 Volt | ICC Target     | 30000     |
| Dry Gas (Set)   | 11.00 l/min | Oct 2 DC              | 1.73 Volt  | Charge Control | on        |

## Compound List:

| # | RT [min] | Range [min] | Height | Area | Area Frac % |
|---|----------|-------------|--------|------|-------------|
| 1 | 14.4     | 14.2 - 14.8 | 30     | 341  | 100.0       |

## Chromatograms:

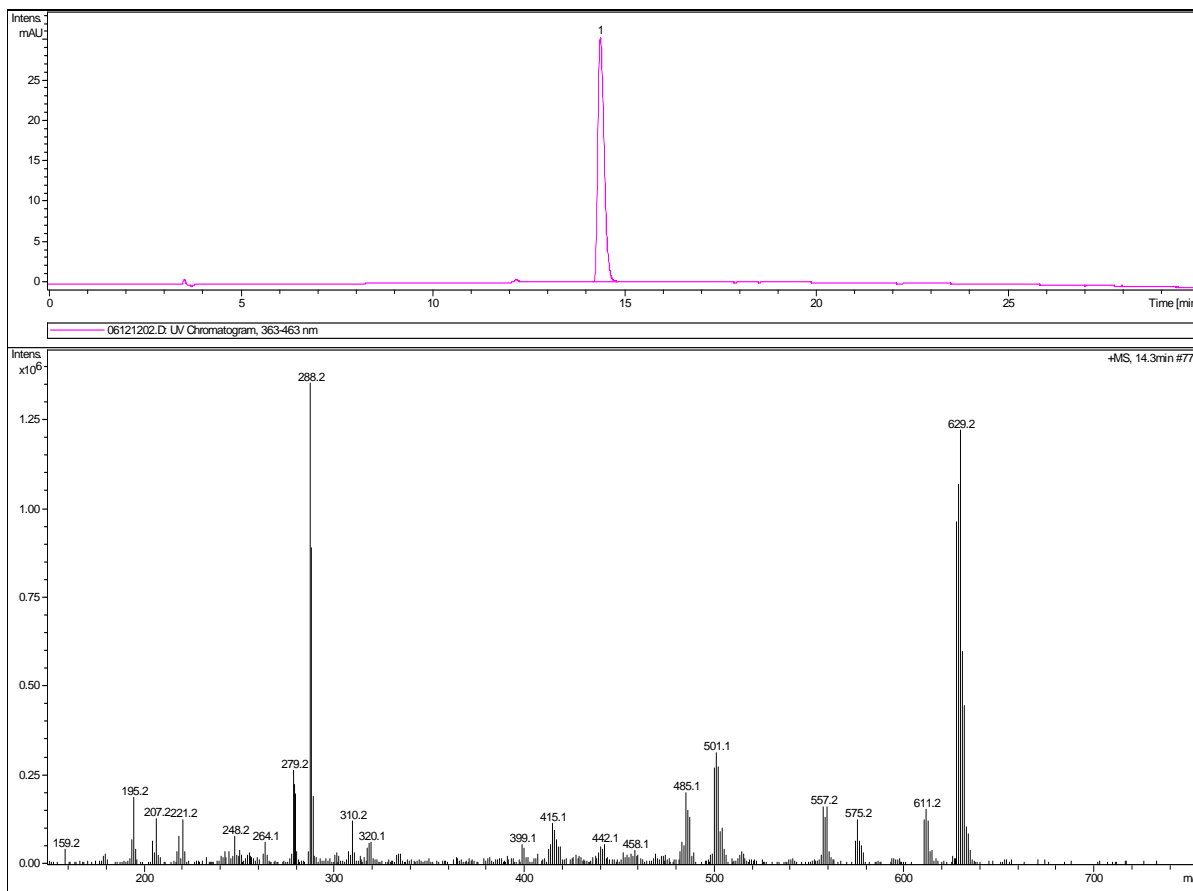

Figure S4.15. LC-MS analysis of compound P3-A7.

## 5. Cell proliferation assays

**Cell culture.** The human non-small cell lung cancer cell line, NCI-H460, was obtained from the American Type Culture Collection (Rockville, MD, USA) and was cultured in RPMI-1640 media (HyClone) containing 4.5 g/L glucose, 1.5 g/L sodium bicarbonate, 10 mM HEPES, and 110 mg/L sodium pyruvate supplemented with 10% fetal bovine serum (FBS), 10% penstrep (P&S), and 10% L-glutamine. Cells were incubated at a constant temperature at 37 °C in a humidified atmosphere containing 5% CO<sub>2</sub> and were subcultured every 2 to 3 days in order to maintain cells in logarithmic growth.

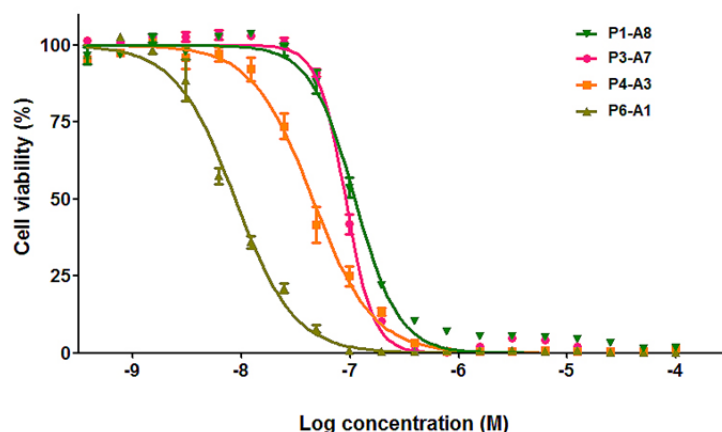

**Figure S5.1.** Drug-response curves for cell proliferation assays in NCI-H460 cells treated with selected compounds. Error bars indicate  $\pm$  standard deviations from the mean for two independent experiments performed in triplicate.

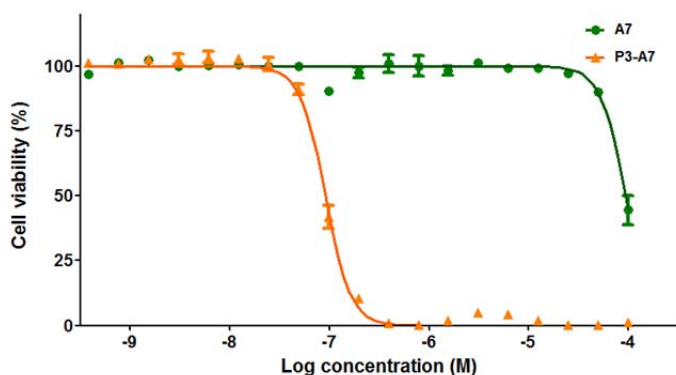

**Figure S5.2.** Drug-response curves for cell proliferation assays in NCI-H460 cells treated with **P3-A7** and the corresponding acridine ligand **A7**. Error bars indicate  $\pm$  standard deviations from the mean for two independent experiments performed in triplicate.



## 6. References

- [1] S. C. Dhara, *Indian Journal of Chemistry* **1970**, *8*, 193-194.
- [2] E. T. Martins, H. Baruah, J. Kramarczyk, G. Saluta, C. S. Day, G. L. Kucera and U. Bierbach, *Journal of Medicinal Chemistry* **2001**, *44*, 4492-4496.
- [3] T. M. Augustus, J. Anderson, S. M. Hess and U. Bierbach, *Bioorganic & Medicinal Chemistry Letters* **2003**, *13*, 855-858.
- [4] Z. Ma, J. R. Choudhury, M. W. Wright, C. S. Day, G. Saluta, G. L. Kucera and U. Bierbach, *Journal of Medicinal Chemistry* **2008**, *51*, 7574-7580.
- [5] L. A. Graham, G. M. Wilson, T. K. West, C. S. Day, G. L. Kucera and U. Bierbach, *ACS Medicinal Chemistry Letters* **2011**, *2*, 687-691.
